# Supplementary material for: Chitosan oligosaccharide as a plant immune inducer on the Passiflora spp. (passion fruit) CMV disease
Source: Front Plant Sci. 2023 Feb 6;14:1131766. doi: 10.3389/fpls.2023.1131766 (PMC9939820; doi:10.3389/fpls.2023.1131766)
Supplement: Supplementary file 1 [file Table_1.xlsx]

## Sheet: Sheet1
Gene_ID	Trans_ID	GO_Term	log2FC	regulation	significant
TRINITY_DN16426_c1_g3	TRINITY_DN16426_c1_g3_i1;TRINITY_DN16426_c1_g3_i2	GO:0005515(protein binding)	10.8322	up	yes
TRINITY_DN16337_c2_g1	TRINITY_DN16337_c2_g1_i1;TRINITY_DN16337_c2_g1_i2	GO:0005515(protein binding)	10.6369	up	yes
TRINITY_DN11716_c0_g4	TRINITY_DN11716_c0_g4_i1	-	8.50237	up	yes
TRINITY_DN11055_c0_g5	TRINITY_DN11055_c0_g5_i1;TRINITY_DN11055_c0_g5_i2	-	6.71969	up	yes
TRINITY_DN16504_c1_g3	TRINITY_DN16504_c1_g3_i1;TRINITY_DN16504_c1_g3_i2	GO:0008234(cysteine-type peptidase activity)	4.48607	up	yes
TRINITY_DN12988_c0_g1	TRINITY_DN12988_c0_g1_i1;TRINITY_DN12988_c0_g1_i2;TRINITY_DN12988_c0_g1_i3;TRINITY_DN12988_c0_g1_i4	GO:0004650(polygalacturonase activity);GO:0005576(extracellular region);GO:0005975(carbohydrate metabolic process)	4.02056	up	yes
TRINITY_DN15650_c0_g2	TRINITY_DN15650_c0_g2_i1;TRINITY_DN15650_c0_g2_i2;TRINITY_DN15650_c0_g2_i3;TRINITY_DN15650_c0_g2_i4;TRINITY_DN15650_c0_g2_i5	GO:0006949(syncytium formation);GO:0009506(plasmodesma)	3.77856	up	yes
TRINITY_DN9739_c0_g1	TRINITY_DN9739_c0_g1_i1;TRINITY_DN9739_c0_g1_i2;TRINITY_DN9739_c0_g1_i3;TRINITY_DN9739_c0_g1_i4;TRINITY_DN9739_c0_g1_i5;TRINITY_DN9739_c0_g1_i6;TRINITY_DN9739_c0_g1_i7	-	3.49683	up	yes
TRINITY_DN9779_c0_g1	TRINITY_DN9779_c0_g1_i1;TRINITY_DN9779_c0_g1_i2;TRINITY_DN9779_c0_g1_i3;TRINITY_DN9779_c0_g1_i4	GO:0010052(guard cell differentiation)	3.46584	up	yes
TRINITY_DN16193_c0_g12	TRINITY_DN16193_c0_g12_i1	-	3.46219	up	yes
TRINITY_DN10514_c0_g2	TRINITY_DN10514_c0_g2_i1;TRINITY_DN10514_c0_g2_i2;TRINITY_DN10514_c0_g2_i3;TRINITY_DN10514_c0_g2_i4;TRINITY_DN10514_c0_g2_i5;TRINITY_DN10514_c0_g2_i6	GO:0005576(extracellular region);GO:0009739(response to gibberellin);GO:0009740(gibberellic acid mediated signaling pathway)	3.35854	up	yes
TRINITY_DN14318_c0_g2	TRINITY_DN14318_c0_g2_i1	GO:0004190(aspartic-type endopeptidase activity);GO:0006508(proteolysis);GO:0030163(protein catabolic process)	3.28966	up	yes
TRINITY_DN12492_c0_g1	TRINITY_DN12492_c0_g1_i1;TRINITY_DN12492_c0_g1_i2	GO:0003723(RNA binding);GO:0005737(cytoplasm);GO:0006351(transcription, DNA-templated);GO:0006355(regulation of transcription, DNA-templated);GO:0010050(vegetative phase change);GO:0010267(production of ta-siRNAs involved in RNA interference);GO:0010599(production of lsiRNA involved in RNA interference);GO:0016246(RNA interference);GO:0035195(gene silencing by miRNA);GO:0035196(production of miRN…	3.18877	up	yes
TRINITY_DN11074_c0_g10	TRINITY_DN11074_c0_g10_i1	-	3.18321	up	yes
TRINITY_DN14146_c0_g6	TRINITY_DN14146_c0_g6_i1;TRINITY_DN14146_c0_g6_i2;TRINITY_DN14146_c0_g6_i3;TRINITY_DN14146_c0_g6_i4	GO:0004805(trehalose-phosphatase activity);GO:0005737(cytoplasm);GO:0005992(trehalose biosynthetic process)	3.05694	up	yes
TRINITY_DN11926_c0_g7	TRINITY_DN11926_c0_g7_i1	-	3.02944	up	yes
TRINITY_DN10320_c0_g1	TRINITY_DN10320_c0_g1_i1;TRINITY_DN10320_c0_g1_i2	-	2.99061	up	yes
TRINITY_DN10047_c0_g1	TRINITY_DN10047_c0_g1_i1	GO:0004190(aspartic-type endopeptidase activity);GO:0006508(proteolysis);GO:0030163(protein catabolic process)	2.97967	up	yes
TRINITY_DN10995_c0_g5	TRINITY_DN10995_c0_g5_i1;TRINITY_DN10995_c0_g5_i2	GO:0008150(biological_process);GO:0031225(anchored component of membrane)	2.91108	up	yes
TRINITY_DN10822_c0_g8	TRINITY_DN10822_c0_g8_i1	GO:0003676(nucleic acid binding);GO:0005575(cellular_component);GO:0015074(DNA integration)	2.74838	up	yes
TRINITY_DN13013_c0_g5	TRINITY_DN13013_c0_g5_i1;TRINITY_DN13013_c0_g5_i2	GO:0016298(lipase activity)	2.748	up	yes
TRINITY_DN14948_c0_g8	TRINITY_DN14948_c0_g8_i1;TRINITY_DN14948_c0_g8_i2	GO:0005576(extracellular region);GO:0016829(lyase activity);GO:0030570(pectate lyase activity);GO:0045490(pectin catabolic process);GO:0046872(metal ion binding)	2.7384	up	yes
TRINITY_DN14513_c0_g6	TRINITY_DN14513_c0_g6_i1;TRINITY_DN14513_c0_g6_i2;TRINITY_DN14513_c0_g6_i3	GO:0000079(regulation of cyclin-dependent protein serine/threonine kinase activity);GO:0004693(cyclin-dependent protein serine/threonine kinase activity);GO:0005515(protein binding);GO:0007049(cell cycle);GO:0019901(protein kinase binding);GO:0051301(cell division);GO:0051726(regulation of cell cycle)	2.73446	up	yes
TRINITY_DN14064_c0_g2	TRINITY_DN14064_c0_g2_i1;TRINITY_DN14064_c0_g2_i2;TRINITY_DN14064_c0_g2_i3;TRINITY_DN14064_c0_g2_i4;TRINITY_DN14064_c0_g2_i5;TRINITY_DN14064_c0_g2_i6;TRINITY_DN14064_c0_g2_i7;TRINITY_DN14064_c0_g2_i8;TRINITY_DN14064_c0_g2_i9	GO:0008422(beta-glucosidase activity);GO:0009651(response to salt stress);GO:0009725(response to hormone);GO:0019762(glucosinolate catabolic process)	2.72335	up	yes
TRINITY_DN14617_c0_g7	TRINITY_DN14617_c0_g7_i1	GO:0004857(enzyme inhibitor activity)	2.65648	up	yes
TRINITY_DN12952_c0_g4	TRINITY_DN12952_c0_g4_i1	GO:0009416(response to light stimulus);GO:0009535(chloroplast thylakoid membrane);GO:0009768(photosynthesis, light harvesting in photosystem I);GO:0009941(chloroplast envelope);GO:0010287(plastoglobule);GO:0016168(chlorophyll binding);GO:0031409(pigment binding)	2.63943	up	yes
TRINITY_DN13610_c0_g7	TRINITY_DN13610_c0_g7_i1;TRINITY_DN13610_c0_g7_i2	GO:0000977(RNA polymerase II regulatory region sequence-specific DNA binding);GO:0003700(DNA binding transcription factor activity);GO:0006357(regulation of transcription by RNA polymerase II);GO:0090575(RNA polymerase II transcription factor complex)	2.59222	up	yes
TRINITY_DN10469_c0_g6	TRINITY_DN10469_c0_g6_i1	GO:0005634(nucleus)	2.59143	up	yes
TRINITY_DN14654_c0_g2	TRINITY_DN14654_c0_g2_i1;TRINITY_DN14654_c0_g2_i2	GO:0004028(3-chloroallyl aldehyde dehydrogenase activity);GO:0004029(aldehyde dehydrogenase (NAD) activity)	2.58147	up	yes
TRINITY_DN13542_c0_g1	TRINITY_DN13542_c0_g1_i1	GO:0005515(protein binding);GO:0005634(nucleus);GO:0006351(transcription, DNA-templated);GO:0045892(negative regulation of transcription, DNA-templated)	2.56108	up	yes
TRINITY_DN16098_c0_g7	TRINITY_DN16098_c0_g7_i1	GO:0009813(flavonoid biosynthetic process);GO:0043231(intracellular membrane-bounded organelle);GO:0052696(flavonoid glucuronidation);GO:0080043(quercetin 3-O-glucosyltransferase activity);GO:0080044(quercetin 7-O-glucosyltransferase activity)	2.52923	up	yes
TRINITY_DN13305_c0_g2	TRINITY_DN13305_c0_g2_i1;TRINITY_DN13305_c0_g2_i2;TRINITY_DN13305_c0_g2_i3;TRINITY_DN13305_c0_g2_i4;TRINITY_DN13305_c0_g2_i5	GO:0004674(protein serine/threonine kinase activity);GO:0005886(plasma membrane)	2.50207	up	yes
TRINITY_DN10075_c0_g2	TRINITY_DN10075_c0_g2_i1	GO:0004857(enzyme inhibitor activity)	2.47359	up	yes
TRINITY_DN11877_c0_g4	TRINITY_DN11877_c0_g4_i1;TRINITY_DN11877_c0_g4_i2	GO:0004857(enzyme inhibitor activity)	2.46898	up	yes
TRINITY_DN11536_c0_g5	TRINITY_DN11536_c0_g5_i1	GO:0003677(DNA binding);GO:0003700(DNA binding transcription factor activity);GO:0005634(nucleus);GO:0005829(cytosol);GO:0006351(transcription, DNA-templated);GO:0006355(regulation of transcription, DNA-templated);GO:0099402(plant organ development)	2.46182	up	yes
TRINITY_DN12756_c0_g8	TRINITY_DN12756_c0_g8_i1	GO:0005515(protein binding)	2.43931	up	yes
TRINITY_DN8987_c0_g1	TRINITY_DN8987_c0_g1_i1;TRINITY_DN8987_c0_g1_i2;TRINITY_DN8987_c0_g1_i3	GO:0003674(molecular_function);GO:0005575(cellular_component);GO:0008150(biological_process)	2.4204	up	yes
TRINITY_DN11324_c1_g7	TRINITY_DN11324_c1_g7_i1	GO:0005618(cell wall);GO:0033609(oxalate metabolic process);GO:0046564(oxalate decarboxylase activity)	2.41295	up	yes
TRINITY_DN11442_c1_g2	TRINITY_DN11442_c1_g2_i1;TRINITY_DN11442_c1_g2_i2;TRINITY_DN11442_c1_g2_i3;TRINITY_DN11442_c1_g2_i4;TRINITY_DN11442_c1_g2_i5	GO:0005794(Golgi apparatus);GO:0016413(O-acetyltransferase activity);GO:0071554(cell wall organization or biogenesis)	2.36804	up	yes
TRINITY_DN12812_c0_g1	TRINITY_DN12812_c0_g1_i1;TRINITY_DN12812_c0_g1_i2;TRINITY_DN12812_c0_g1_i3	GO:0005576(extracellular region);GO:0007267(cell-cell signaling);GO:0009553(embryo sac development);GO:0010430(fatty acid omega-oxidation);GO:0016614(oxidoreductase activity, acting on CH-OH group of donors);GO:0016832(aldehyde-lyase activity);GO:0046593(mandelonitrile lyase activity);GO:0050660(flavin adenine dinucleotide binding);GO:0055114(oxidation-reduction process)	2.35436	up	yes
TRINITY_DN11516_c0_g3	TRINITY_DN11516_c0_g3_i1;TRINITY_DN11516_c0_g3_i2	GO:0003677(DNA binding);GO:0003700(DNA binding transcription factor activity);GO:0005634(nucleus);GO:0006351(transcription, DNA-templated);GO:0006355(regulation of transcription, DNA-templated);GO:0009873(ethylene-activated signaling pathway)	2.34782	up	yes
TRINITY_DN15160_c0_g1	TRINITY_DN15160_c0_g1_i1	GO:0003680(AT DNA binding);GO:0003700(DNA binding transcription factor activity);GO:0005634(nucleus);GO:0006351(transcription, DNA-templated);GO:0006355(regulation of transcription, DNA-templated)	2.32658	up	yes
TRINITY_DN12841_c2_g2	TRINITY_DN12841_c2_g2_i1;TRINITY_DN12841_c2_g2_i2;TRINITY_DN12841_c2_g2_i3;TRINITY_DN12841_c2_g2_i4;TRINITY_DN12841_c2_g2_i5	GO:0005576(extracellular region);GO:0016042(lipid catabolic process);GO:0016788(hydrolase activity, acting on ester bonds);GO:0042335(cuticle development);GO:0052689(carboxylic ester hydrolase activity)	2.30448	up	yes
TRINITY_DN15291_c0_g1	TRINITY_DN15291_c0_g1_i1	GO:0005737(cytoplasm)	2.29427	up	yes
TRINITY_DN13884_c1_g2	TRINITY_DN13884_c1_g2_i1	GO:0005886(plasma membrane);GO:0016301(kinase activity);GO:0016310(phosphorylation)	2.27943	up	yes
TRINITY_DN11009_c0_g4	TRINITY_DN11009_c0_g4_i1	GO:0005634(nucleus);GO:0005886(plasma membrane);GO:0016301(kinase activity);GO:0016310(phosphorylation)	2.26066	up	yes
TRINITY_DN10088_c0_g1	TRINITY_DN10088_c0_g1_i1	-	2.256	up	yes
TRINITY_DN13046_c0_g1	TRINITY_DN13046_c0_g1_i1	GO:0000166(nucleotide binding);GO:0005886(plasma membrane);GO:0006281(DNA repair);GO:0007165(signal transduction);GO:0009411(response to UV);GO:0009507(chloroplast);GO:0009650(UV protection);GO:0042493(response to drug)	2.25574	up	yes
TRINITY_DN12996_c0_g9	TRINITY_DN12996_c0_g9_i1	GO:0003674(molecular_function);GO:0005794(Golgi apparatus);GO:0005886(plasma membrane);GO:0009505(plant-type cell wall);GO:0009506(plasmodesma);GO:0031225(anchored component of membrane);GO:0046658(anchored component of plasma membrane)	2.24113	up	yes
TRINITY_DN15711_c0_g5	TRINITY_DN15711_c0_g5_i1;TRINITY_DN15711_c0_g5_i2	GO:0003674(molecular_function);GO:0005576(extracellular region);GO:0008150(biological_process)	2.23167	up	yes
TRINITY_DN10500_c0_g3	TRINITY_DN10500_c0_g3_i1;TRINITY_DN10500_c0_g3_i2;TRINITY_DN10500_c0_g3_i3	GO:0004553(hydrolase activity, hydrolyzing O-glycosyl compounds);GO:0005576(extracellular region);GO:0005618(cell wall);GO:0010411(xyloglucan metabolic process);GO:0016762(xyloglucan:xyloglucosyl transferase activity);GO:0016798(hydrolase activity, acting on glycosyl bonds);GO:0042546(cell wall biogenesis);GO:0048046(apoplast);GO:0071555(cell wall organization)	2.23065	up	yes
TRINITY_DN15930_c0_g4	TRINITY_DN15930_c0_g4_i1;TRINITY_DN15930_c0_g4_i2	GO:0006820(anion transport);GO:0016021(integral component of membrane);GO:0022857(transmembrane transporter activity);GO:0055085(transmembrane transport)	2.23052	up	yes
TRINITY_DN14617_c0_g1	TRINITY_DN14617_c0_g1_i1	GO:0004857(enzyme inhibitor activity)	2.23048	up	yes
TRINITY_DN11521_c0_g2	TRINITY_DN11521_c0_g2_i1	GO:0009809(lignin biosynthetic process);GO:0016020(membrane);GO:0016709(oxidoreductase activity, acting on paired donors, with incorporation or reduction of molecular oxygen, NAD(P)H as one donor, and incorporation of one atom of oxygen)	2.21796	up	yes
TRINITY_DN11823_c0_g3	TRINITY_DN11823_c0_g3_i1;TRINITY_DN11823_c0_g3_i2;TRINITY_DN11823_c0_g3_i3	GO:0005576(extracellular region);GO:0016042(lipid catabolic process);GO:0016788(hydrolase activity, acting on ester bonds);GO:0052689(carboxylic ester hydrolase activity)	2.21008	up	yes
TRINITY_DN10622_c2_g3	TRINITY_DN10622_c2_g3_i1	-	2.19173	up	yes
TRINITY_DN11415_c1_g3	TRINITY_DN11415_c1_g3_i1;TRINITY_DN11415_c1_g3_i2;TRINITY_DN11415_c1_g3_i3	GO:0005507(copper ion binding);GO:0005509(calcium ion binding);GO:0005515(protein binding);GO:0005516(calmodulin binding);GO:0005546(phosphatidylinositol-4,5-bisphosphate binding);GO:0005547(phosphatidylinositol-3,4,5-trisphosphate binding);GO:0005773(vacuole);GO:0005881(cytoplasmic microtubule);GO:0005886(plasma membrane);GO:0006499(N-terminal protein myristoylation);GO:0008017(microtubule bindi…	2.18873	up	yes
TRINITY_DN12024_c0_g2	TRINITY_DN12024_c0_g2_i1;TRINITY_DN12024_c0_g2_i2	GO:0015079(potassium ion transmembrane transporter activity);GO:0016020(membrane)	2.18359	up	yes
TRINITY_DN14948_c0_g6	TRINITY_DN14948_c0_g6_i1	-	2.16658	up	yes
TRINITY_DN9584_c0_g2	TRINITY_DN9584_c0_g2_i1	GO:0005739(mitochondrion)	2.14536	up	yes
TRINITY_DN16211_c0_g7	TRINITY_DN16211_c0_g7_i1	GO:0004565(beta-galactosidase activity);GO:0005618(cell wall);GO:0005773(vacuole)	2.12676	up	yes
TRINITY_DN15227_c0_g1	TRINITY_DN15227_c0_g1_i1;TRINITY_DN15227_c0_g1_i2;TRINITY_DN15227_c0_g1_i3;TRINITY_DN15227_c0_g1_i4	GO:0003824(catalytic activity);GO:0004467(long-chain fatty acid-CoA ligase activity);GO:0005524(ATP binding);GO:0005634(nucleus);GO:0005783(endoplasmic reticulum);GO:0006631(fatty acid metabolic process);GO:0006633(fatty acid biosynthetic process);GO:0008152(metabolic process);GO:0009506(plasmodesma);GO:0010025(wax biosynthetic process);GO:0010143(cutin biosynthetic process);GO:0010311(lateral ro…	2.12339	up	yes
TRINITY_DN3917_c0_g1	TRINITY_DN3917_c0_g1_i1	GO:0005774(vacuolar membrane);GO:0005886(plasma membrane);GO:0009507(chloroplast);GO:0009620(response to fungus);GO:0009651(response to salt stress);GO:0009695(jasmonic acid biosynthetic process);GO:0016020(membrane);GO:0046423(allene-oxide cyclase activity)	2.11376	up	yes
TRINITY_DN14437_c0_g2	TRINITY_DN14437_c0_g2_i1;TRINITY_DN14437_c0_g2_i2;TRINITY_DN14437_c0_g2_i3	GO:0005576(extracellular region);GO:0016042(lipid catabolic process);GO:0016788(hydrolase activity, acting on ester bonds);GO:0052689(carboxylic ester hydrolase activity)	2.11061	up	yes
TRINITY_DN11410_c0_g7	TRINITY_DN11410_c0_g7_i1;TRINITY_DN11410_c0_g7_i2;TRINITY_DN11410_c0_g7_i3	GO:0003677(DNA binding);GO:0003700(DNA binding transcription factor activity);GO:0005515(protein binding);GO:0005634(nucleus);GO:0007275(multicellular organism development);GO:0009909(regulation of flower development);GO:0009933(meristem structural organization);GO:0009944(polarity specification of adaxial/abaxial axis);GO:0010093(specification of floral organ identity);GO:0010154(fruit developme…	2.091	up	yes
TRINITY_DN8375_c0_g1	TRINITY_DN8375_c0_g1_i1	GO:0003700(DNA binding transcription factor activity);GO:0005634(nucleus);GO:0006351(transcription, DNA-templated);GO:0006355(regulation of transcription, DNA-templated);GO:0010228(vegetative to reproductive phase transition of meristem);GO:0045893(positive regulation of transcription, DNA-templated);GO:1990837(sequence-specific double-stranded DNA binding)	2.08731	up	yes
TRINITY_DN15791_c1_g4	TRINITY_DN15791_c1_g4_i1;TRINITY_DN15791_c1_g4_i2;TRINITY_DN15791_c1_g4_i3;TRINITY_DN15791_c1_g4_i4	GO:0004674(protein serine/threonine kinase activity);GO:0005829(cytosol);GO:0006468(protein phosphorylation);GO:0035556(intracellular signal transduction)	2.0865	up	yes
TRINITY_DN13236_c0_g1	TRINITY_DN13236_c0_g1_i1	GO:0004601(peroxidase activity);GO:0005515(protein binding);GO:0005576(extracellular region);GO:0006979(response to oxidative stress);GO:0009651(response to salt stress);GO:0020037(heme binding);GO:0042744(hydrogen peroxide catabolic process);GO:0046872(metal ion binding);GO:0055114(oxidation-reduction process)	2.08055	up	yes
TRINITY_DN9458_c0_g1	TRINITY_DN9458_c0_g1_i1	GO:0003674(molecular_function);GO:0008150(biological_process)	2.07203	up	yes
TRINITY_DN9471_c0_g1	TRINITY_DN9471_c0_g1_i1	GO:0003993(acid phosphatase activity);GO:0016311(dephosphorylation)	2.06754	up	yes
TRINITY_DN14362_c1_g4	TRINITY_DN14362_c1_g4_i1	GO:0003674(molecular_function);GO:0005886(plasma membrane);GO:0008150(biological_process);GO:0016021(integral component of membrane)	2.06226	up	yes
TRINITY_DN10801_c0_g2	TRINITY_DN10801_c0_g2_i1;TRINITY_DN10801_c0_g2_i2	GO:0005515(protein binding);GO:0005576(extracellular region);GO:0009751(response to salicylic acid);GO:0010226(response to lithium ion);GO:0016042(lipid catabolic process);GO:0016788(hydrolase activity, acting on ester bonds);GO:0042538(hyperosmotic salinity response);GO:0052689(carboxylic ester hydrolase activity)	2.05376	up	yes
TRINITY_DN11527_c0_g3	TRINITY_DN11527_c0_g3_i1	-	2.05376	up	yes
TRINITY_DN14553_c0_g6	TRINITY_DN14553_c0_g6_i1	GO:0005576(extracellular region);GO:0007165(signal transduction)	2.04982	up	yes
TRINITY_DN10937_c0_g1	TRINITY_DN10937_c0_g1_i1;TRINITY_DN10937_c0_g1_i2;TRINITY_DN10937_c0_g1_i3;TRINITY_DN10937_c0_g1_i4;TRINITY_DN10937_c0_g1_i5	GO:0005524(ATP binding);GO:0008152(metabolic process);GO:0009411(response to UV);GO:0009611(response to wounding);GO:0009698(phenylpropanoid metabolic process);GO:0010584(pollen exine formation);GO:0016021(integral component of membrane);GO:0016207(4-coumarate-CoA ligase activity);GO:0016874(ligase activity);GO:0050832(defense response to fungus)	2.04409	up	yes
TRINITY_DN15059_c1_g4	TRINITY_DN15059_c1_g4_i1	GO:0004367(glycerol-3-phosphate dehydrogenase [NAD+] activity);GO:0005737(cytoplasm);GO:0005829(cytosol);GO:0005975(carbohydrate metabolic process);GO:0006072(glycerol-3-phosphate metabolic process);GO:0009331(glycerol-3-phosphate dehydrogenase complex);GO:0046168(glycerol-3-phosphate catabolic process);GO:0051287(NAD binding);GO:0055114(oxidation-reduction process)	2.03675	up	yes
TRINITY_DN12153_c1_g2	TRINITY_DN12153_c1_g2_i1;TRINITY_DN12153_c1_g2_i2;TRINITY_DN12153_c1_g2_i3;TRINITY_DN12153_c1_g2_i4;TRINITY_DN12153_c1_g2_i5;TRINITY_DN12153_c1_g2_i6	GO:0006869(lipid transport);GO:0008289(lipid binding);GO:0009506(plasmodesma);GO:0009507(chloroplast);GO:0009535(chloroplast thylakoid membrane);GO:0016020(membrane);GO:0048046(apoplast)	2.02806	up	yes
TRINITY_DN16376_c0_g5	TRINITY_DN16376_c0_g5_i1;TRINITY_DN16376_c0_g5_i2	GO:0005768(endosome);GO:0005774(vacuolar membrane);GO:0005802(trans-Golgi network);GO:0008757(S-adenosylmethionine-dependent methyltransferase activity);GO:0032259(methylation)	2.02077	up	yes
TRINITY_DN12329_c0_g1	TRINITY_DN12329_c0_g1_i1;TRINITY_DN12329_c0_g1_i2;TRINITY_DN12329_c0_g1_i3;TRINITY_DN12329_c0_g1_i4	GO:0003700(DNA binding transcription factor activity);GO:0005515(protein binding);GO:0005634(nucleus);GO:0006351(transcription, DNA-templated);GO:0006355(regulation of transcription, DNA-templated);GO:0009733(response to auxin);GO:0009734(auxin-activated signaling pathway)	2.02002	up	yes
TRINITY_DN10865_c0_g2	TRINITY_DN10865_c0_g2_i1	GO:0005506(iron ion binding);GO:0005515(protein binding);GO:0005576(extracellular region);GO:0006631(fatty acid metabolic process);GO:0006952(defense response);GO:0016021(integral component of membrane);GO:0018685(alkane 1-monooxygenase activity);GO:0019825(oxygen binding);GO:0020037(heme binding);GO:0055114(oxidation-reduction process);GO:0070330(aromatase activity)	2.01686	up	yes
TRINITY_DN12023_c0_g2	TRINITY_DN12023_c0_g2_i1;TRINITY_DN12023_c0_g2_i2;TRINITY_DN12023_c0_g2_i3	GO:0003714(transcription corepressor activity);GO:0005634(nucleus);GO:0009611(response to wounding);GO:0031347(regulation of defense response);GO:1903507(negative regulation of nucleic acid-templated transcription);GO:2000022(regulation of jasmonic acid mediated signaling pathway)	2.01421	up	yes
TRINITY_DN11656_c0_g1	TRINITY_DN11656_c0_g1_i1;TRINITY_DN11656_c0_g1_i2;TRINITY_DN11656_c0_g1_i3;TRINITY_DN11656_c0_g1_i4;TRINITY_DN11656_c0_g1_i5	GO:0000977(RNA polymerase II regulatory region sequence-specific DNA binding);GO:0003677(DNA binding);GO:0003700(DNA binding transcription factor activity);GO:0005515(protein binding);GO:0005634(nucleus);GO:0006351(transcription, DNA-templated);GO:0006355(regulation of transcription, DNA-templated);GO:0045893(positive regulation of transcription, DNA-templated)	1.99941	up	yes
TRINITY_DN10333_c0_g1	TRINITY_DN10333_c0_g1_i1	GO:0003674(molecular_function);GO:0005576(extracellular region);GO:0005618(cell wall);GO:0008150(biological_process);GO:0009505(plant-type cell wall)	1.99647	up	yes
TRINITY_DN16411_c1_g1	TRINITY_DN16411_c1_g1_i1;TRINITY_DN16411_c1_g1_i2;TRINITY_DN16411_c1_g1_i3;TRINITY_DN16411_c1_g1_i4;TRINITY_DN16411_c1_g1_i5;TRINITY_DN16411_c1_g1_i6;TRINITY_DN16411_c1_g1_i7;TRINITY_DN16411_c1_g1_i8	-	1.99191	up	yes
TRINITY_DN13130_c0_g2	TRINITY_DN13130_c0_g2_i1;TRINITY_DN13130_c0_g2_i2;TRINITY_DN13130_c0_g2_i3;TRINITY_DN13130_c0_g2_i4;TRINITY_DN13130_c0_g2_i5;TRINITY_DN13130_c0_g2_i6;TRINITY_DN13130_c0_g2_i7;TRINITY_DN13130_c0_g2_i8	GO:0003674(molecular_function);GO:0005634(nucleus);GO:0008150(biological_process)	1.99008	up	yes
TRINITY_DN13991_c0_g2	TRINITY_DN13991_c0_g2_i1;TRINITY_DN13991_c0_g2_i2	GO:0005576(extracellular region);GO:0016829(lyase activity);GO:0030570(pectate lyase activity);GO:0045490(pectin catabolic process);GO:0046872(metal ion binding)	1.98498	up	yes
TRINITY_DN13666_c0_g3	TRINITY_DN13666_c0_g3_i1;TRINITY_DN13666_c0_g3_i2;TRINITY_DN13666_c0_g3_i3	GO:0000139(Golgi membrane);GO:0005794(Golgi apparatus);GO:0009294(DNA mediated transformation);GO:0009617(response to bacterium);GO:0016021(integral component of membrane);GO:0016757(transferase activity, transferring glycosyl groups);GO:0047259(glucomannan 4-beta-mannosyltransferase activity);GO:0051753(mannan synthase activity);GO:0071555(cell wall organization)	1.97935	up	yes
TRINITY_DN10761_c0_g2	TRINITY_DN10761_c0_g2_i1;TRINITY_DN10761_c0_g2_i2;TRINITY_DN10761_c0_g2_i3	GO:0003700(DNA binding transcription factor activity);GO:0005634(nucleus);GO:0006355(regulation of transcription, DNA-templated);GO:0009793(embryo development ending in seed dormancy)	1.97792	up	yes
TRINITY_DN10622_c1_g2	TRINITY_DN10622_c1_g2_i1;TRINITY_DN10622_c1_g2_i2	GO:0005576(extracellular region);GO:0005618(cell wall)	1.97722	up	yes
TRINITY_DN11820_c0_g2	TRINITY_DN11820_c0_g2_i1;TRINITY_DN11820_c0_g2_i2	GO:0003714(transcription corepressor activity);GO:0005634(nucleus);GO:0009611(response to wounding);GO:0031347(regulation of defense response);GO:1903507(negative regulation of nucleic acid-templated transcription);GO:2000022(regulation of jasmonic acid mediated signaling pathway)	1.97226	up	yes
TRINITY_DN11437_c0_g8	TRINITY_DN11437_c0_g8_i1	GO:0007165(signal transduction)	1.96314	up	yes
TRINITY_DN12682_c0_g2	TRINITY_DN12682_c0_g2_i1;TRINITY_DN12682_c0_g2_i2	GO:0004805(trehalose-phosphatase activity);GO:0005992(trehalose biosynthetic process)	1.96075	up	yes
TRINITY_DN14088_c0_g1	TRINITY_DN14088_c0_g1_i1;TRINITY_DN14088_c0_g1_i2;TRINITY_DN14088_c0_g1_i3;TRINITY_DN14088_c0_g1_i4;TRINITY_DN14088_c0_g1_i5;TRINITY_DN14088_c0_g1_i6;TRINITY_DN14088_c0_g1_i7	-	1.96061	up	yes
TRINITY_DN13864_c1_g7	TRINITY_DN13864_c1_g7_i1;TRINITY_DN13864_c1_g7_i2	GO:0005576(extracellular region);GO:0005618(cell wall);GO:0009664(plant-type cell wall organization);GO:0009826(unidimensional cell growth);GO:0009828(plant-type cell wall loosening);GO:0009831(plant-type cell wall modification involved in multidimensional cell growth);GO:0016020(membrane);GO:0080022(primary root development)	1.95172	up	yes
TRINITY_DN16057_c0_g7	TRINITY_DN16057_c0_g7_i1	GO:0005634(nucleus);GO:0005737(cytoplasm);GO:0006351(transcription, DNA-templated);GO:0006355(regulation of transcription, DNA-templated);GO:0009416(response to light stimulus);GO:0040008(regulation of growth);GO:0046983(protein dimerization activity)	1.94235	up	yes
TRINITY_DN15227_c0_g2	TRINITY_DN15227_c0_g2_i1;TRINITY_DN15227_c0_g2_i2;TRINITY_DN15227_c0_g2_i3;TRINITY_DN15227_c0_g2_i4	GO:0003824(catalytic activity);GO:0004467(long-chain fatty acid-CoA ligase activity);GO:0005524(ATP binding);GO:0005634(nucleus);GO:0005783(endoplasmic reticulum);GO:0006631(fatty acid metabolic process);GO:0006633(fatty acid biosynthetic process);GO:0008152(metabolic process);GO:0009506(plasmodesma);GO:0010025(wax biosynthetic process);GO:0010143(cutin biosynthetic process);GO:0010311(lateral ro…	1.92862	up	yes
TRINITY_DN12822_c0_g3	TRINITY_DN12822_c0_g3_i1	GO:0004674(protein serine/threonine kinase activity);GO:0005524(ATP binding);GO:0005886(plasma membrane);GO:0006468(protein phosphorylation);GO:0007169(transmembrane receptor protein tyrosine kinase signaling pathway);GO:0010082(regulation of root meristem growth);GO:0016301(kinase activity)	1.92833	up	yes
TRINITY_DN13718_c0_g3	TRINITY_DN13718_c0_g3_i1;TRINITY_DN13718_c0_g3_i2;TRINITY_DN13718_c0_g3_i3	GO:0005215(transporter activity);GO:0005886(plasma membrane);GO:0006857(oligopeptide transport);GO:0015706(nitrate transport);GO:0016020(membrane);GO:0016021(integral component of membrane);GO:0022857(transmembrane transporter activity);GO:0042938(dipeptide transport);GO:0055085(transmembrane transport)	1.92673	up	yes
TRINITY_DN11520_c0_g3	TRINITY_DN11520_c0_g3_i1	GO:0003700(DNA binding transcription factor activity);GO:0005634(nucleus);GO:0006355(regulation of transcription, DNA-templated);GO:0008356(asymmetric cell division);GO:0009630(gravitropism);GO:0009956(radial pattern formation);GO:0043565(sequence-specific DNA binding);GO:0048366(leaf development);GO:0051457(maintenance of protein location in nucleus);GO:0090610(bundle sheath cell fate specificat…	1.92602	up	yes
TRINITY_DN8524_c0_g1	TRINITY_DN8524_c0_g1_i1	GO:0005634(nucleus);GO:0006351(transcription, DNA-templated);GO:0006355(regulation of transcription, DNA-templated);GO:0007623(circadian rhythm);GO:0009641(shade avoidance);GO:0009742(brassinosteroid mediated signaling pathway);GO:0032502(developmental process);GO:0040008(regulation of growth);GO:0046983(protein dimerization activity)	1.9259	up	yes
TRINITY_DN12347_c0_g2	TRINITY_DN12347_c0_g2_i1;TRINITY_DN12347_c0_g2_i2	GO:0003674(molecular_function);GO:0005634(nucleus)	1.9127	up	yes
TRINITY_DN13220_c0_g6	TRINITY_DN13220_c0_g6_i1;TRINITY_DN13220_c0_g6_i2	GO:0003674(molecular_function);GO:0008150(biological_process);GO:0009507(chloroplast)	1.90602	up	yes
TRINITY_DN13757_c0_g1	TRINITY_DN13757_c0_g1_i1;TRINITY_DN13757_c0_g1_i2;TRINITY_DN13757_c0_g1_i3;TRINITY_DN13757_c0_g1_i4;TRINITY_DN13757_c0_g1_i5;TRINITY_DN13757_c0_g1_i6;TRINITY_DN13757_c0_g1_i7;TRINITY_DN13757_c0_g1_i8;TRINITY_DN13757_c0_g1_i9	GO:0004046(aminoacylase activity);GO:0005737(cytoplasm);GO:0005773(vacuole);GO:0005783(endoplasmic reticulum);GO:0005794(Golgi apparatus);GO:0010043(response to zinc ion)	1.90467	up	yes
TRINITY_DN14106_c0_g2	TRINITY_DN14106_c0_g2_i1;TRINITY_DN14106_c0_g2_i2	GO:0004806(triglyceride lipase activity);GO:0006629(lipid metabolic process);GO:0009534(chloroplast thylakoid);GO:0015908(fatty acid transport);GO:0019432(triglyceride biosynthetic process);GO:0052739(phosphatidylserine 1-acylhydrolase activity)	1.8922	up	yes
TRINITY_DN16051_c1_g2	TRINITY_DN16051_c1_g2_i1;TRINITY_DN16051_c1_g2_i2;TRINITY_DN16051_c1_g2_i3;TRINITY_DN16051_c1_g2_i4	GO:0005886(plasma membrane);GO:0016021(integral component of membrane);GO:0042626(ATPase activity, coupled to transmembrane movement of substances)	1.88423	up	yes
TRINITY_DN16418_c1_g3	TRINITY_DN16418_c1_g3_i1	GO:0005737(cytoplasm);GO:0008270(zinc ion binding);GO:0009617(response to bacterium);GO:0009626(plant-type hypersensitive response);GO:0009809(lignin biosynthetic process);GO:0045551(cinnamyl-alcohol dehydrogenase activity);GO:0046029(mannitol dehydrogenase activity);GO:0047681(aryl-alcohol dehydrogenase (NADP+) activity);GO:0052747(sinapyl alcohol dehydrogenase activity);GO:0055114(oxidation-red…	1.88219	up	yes
TRINITY_DN13854_c0_g5	TRINITY_DN13854_c0_g5_i1	-	1.88192	up	yes
TRINITY_DN12992_c0_g3	TRINITY_DN12992_c0_g3_i1	-	1.87826	up	yes
TRINITY_DN13036_c0_g6	TRINITY_DN13036_c0_g6_i1;TRINITY_DN13036_c0_g6_i2	-	1.86486	up	yes
TRINITY_DN16253_c0_g7	TRINITY_DN16253_c0_g7_i1;TRINITY_DN16253_c0_g7_i2;TRINITY_DN16253_c0_g7_i3	-	1.8579	up	yes
TRINITY_DN9948_c0_g1	TRINITY_DN9948_c0_g1_i1	GO:0005534(galactose binding);GO:0005575(cellular_component);GO:0017148(negative regulation of translation);GO:0030598(rRNA N-glycosylase activity);GO:0045807(positive regulation of endocytosis)	1.85231	up	yes
TRINITY_DN9688_c0_g1	TRINITY_DN9688_c0_g1_i1	GO:0005576(extracellular region);GO:0010374(stomatal complex development)	1.84614	up	yes
TRINITY_DN15313_c0_g1	TRINITY_DN15313_c0_g1_i1;TRINITY_DN15313_c0_g1_i2	GO:0005737(cytoplasm);GO:0005829(cytosol);GO:0009793(embryo development ending in seed dormancy);GO:0010090(trichome morphogenesis);GO:0010143(cutin biosynthetic process);GO:0016740(transferase activity);GO:0016747(transferase activity, transferring acyl groups other than amino-acyl groups);GO:0051179(localization);GO:0090626(plant epidermis morphogenesis)	1.84236	up	yes
TRINITY_DN13301_c0_g4	TRINITY_DN13301_c0_g4_i1;TRINITY_DN13301_c0_g4_i2	GO:0010143(cutin biosynthetic process);GO:0016020(membrane);GO:0016311(dephosphorylation);GO:0016791(phosphatase activity);GO:0090447(glycerol-3-phosphate 2-O-acyltransferase activity)	1.83851	up	yes
TRINITY_DN16560_c0_g5	TRINITY_DN16560_c0_g5_i1	-	1.831	up	yes
TRINITY_DN15544_c0_g3	TRINITY_DN15544_c0_g3_i1;TRINITY_DN15544_c0_g3_i2;TRINITY_DN15544_c0_g3_i3;TRINITY_DN15544_c0_g3_i4	GO:0003723(RNA binding);GO:0003725(double-stranded RNA binding);GO:0005515(protein binding);GO:0008150(biological_process)	1.831	up	yes
TRINITY_DN9893_c0_g1	TRINITY_DN9893_c0_g1_i1	GO:0003674(molecular_function);GO:0008150(biological_process);GO:0016021(integral component of membrane)	1.82754	up	yes
TRINITY_DN13441_c1_g1	TRINITY_DN13441_c1_g1_i1	-	1.82517	up	yes
TRINITY_DN12199_c0_g1	TRINITY_DN12199_c0_g1_i1;TRINITY_DN12199_c0_g1_i2;TRINITY_DN12199_c0_g1_i3;TRINITY_DN12199_c0_g1_i4;TRINITY_DN12199_c0_g1_i5;TRINITY_DN12199_c0_g1_i6;TRINITY_DN12199_c0_g1_i7;TRINITY_DN12199_c0_g1_i8	GO:0004565(beta-galactosidase activity);GO:0005618(cell wall);GO:0005773(vacuole)	1.82293	up	yes
TRINITY_DN12091_c0_g1	TRINITY_DN12091_c0_g1_i1;TRINITY_DN12091_c0_g1_i2;TRINITY_DN12091_c0_g1_i3;TRINITY_DN12091_c0_g1_i4;TRINITY_DN12091_c0_g1_i5	GO:0005634(nucleus);GO:0052689(carboxylic ester hydrolase activity)	1.81963	up	yes
TRINITY_DN16147_c0_g6	TRINITY_DN16147_c0_g6_i1;TRINITY_DN16147_c0_g6_i2	GO:0005634(nucleus);GO:0008150(biological_process);GO:0046872(metal ion binding)	1.81737	up	yes
TRINITY_DN10865_c0_g6	TRINITY_DN10865_c0_g6_i1	GO:0016709(oxidoreductase activity, acting on paired donors, with incorporation or reduction of molecular oxygen, NAD(P)H as one donor, and incorporation of one atom of oxygen);GO:0035336(long-chain fatty-acyl-CoA metabolic process)	1.8094	up	yes
TRINITY_DN14769_c0_g2	TRINITY_DN14769_c0_g2_i1	GO:0005887(integral component of plasma membrane);GO:0008519(ammonium transmembrane transporter activity);GO:0015695(organic cation transport);GO:0019740(nitrogen utilization);GO:0072488(ammonium transmembrane transport)	1.80639	up	yes
TRINITY_DN10746_c1_g1	TRINITY_DN10746_c1_g1_i1	GO:0005199(structural constituent of cell wall);GO:0005576(extracellular region);GO:0005618(cell wall);GO:0006949(syncytium formation);GO:0009505(plant-type cell wall);GO:0009664(plant-type cell wall organization);GO:0009826(unidimensional cell growth);GO:0009828(plant-type cell wall loosening);GO:0009831(plant-type cell wall modification involved in multidimensional cell growth);GO:0016020(membr…	1.80236	up	yes
TRINITY_DN14804_c0_g2	TRINITY_DN14804_c0_g2_i1;TRINITY_DN14804_c0_g2_i10;TRINITY_DN14804_c0_g2_i11;TRINITY_DN14804_c0_g2_i12;TRINITY_DN14804_c0_g2_i13;TRINITY_DN14804_c0_g2_i2;TRINITY_DN14804_c0_g2_i3;TRINITY_DN14804_c0_g2_i4;TRINITY_DN14804_c0_g2_i5;TRINITY_DN14804_c0_g2_i6;TRINITY_DN14804_c0_g2_i7;TRINITY_DN14804_c0_g2_i8;TRINITY_DN14804_c0_g2_i9	-	1.80169	up	yes
TRINITY_DN13950_c0_g3	TRINITY_DN13950_c0_g3_i1	GO:0004674(protein serine/threonine kinase activity);GO:0005886(plasma membrane);GO:0006468(protein phosphorylation);GO:0006952(defense response);GO:0009506(plasmodesma)	1.79592	up	yes
TRINITY_DN14485_c0_g1	TRINITY_DN14485_c0_g1_i1;TRINITY_DN14485_c0_g1_i2	GO:0005576(extracellular region);GO:0006631(fatty acid metabolic process);GO:0008126(acetylesterase activity);GO:0016042(lipid catabolic process);GO:0052689(carboxylic ester hydrolase activity)	1.78889	up	yes
TRINITY_DN10976_c0_g5	TRINITY_DN10976_c0_g5_i1;TRINITY_DN10976_c0_g5_i2;TRINITY_DN10976_c0_g5_i3;TRINITY_DN10976_c0_g5_i4;TRINITY_DN10976_c0_g5_i5;TRINITY_DN10976_c0_g5_i6	GO:0006810(transport);GO:0030288(outer membrane-bounded periplasmic space);GO:0036094(small molecule binding)	1.78502	up	yes
TRINITY_DN16190_c0_g2	TRINITY_DN16190_c0_g2_i1;TRINITY_DN16190_c0_g2_i2;TRINITY_DN16190_c0_g2_i3;TRINITY_DN16190_c0_g2_i4	GO:0005576(extracellular region);GO:0005618(cell wall)	1.78222	up	yes
TRINITY_DN11435_c0_g2	TRINITY_DN11435_c0_g2_i1;TRINITY_DN11435_c0_g2_i2	GO:0004190(aspartic-type endopeptidase activity);GO:0006508(proteolysis);GO:0030163(protein catabolic process)	1.78144	up	yes
TRINITY_DN12894_c0_g4	TRINITY_DN12894_c0_g4_i1;TRINITY_DN12894_c0_g4_i2	GO:0004046(aminoacylase activity);GO:0005737(cytoplasm);GO:0005773(vacuole);GO:0005783(endoplasmic reticulum);GO:0005794(Golgi apparatus);GO:0010043(response to zinc ion)	1.77991	up	yes
TRINITY_DN15077_c0_g5	TRINITY_DN15077_c0_g5_i1	-	1.77616	up	yes
TRINITY_DN15838_c0_g1	TRINITY_DN15838_c0_g1_i1;TRINITY_DN15838_c0_g1_i2	GO:0009507(chloroplast);GO:0016020(membrane)	1.77616	up	yes
TRINITY_DN10679_c0_g2	TRINITY_DN10679_c0_g2_i1	GO:0016787(hydrolase activity)	1.77549	up	yes
TRINITY_DN11498_c0_g2	TRINITY_DN11498_c0_g2_i1;TRINITY_DN11498_c0_g2_i2	-	1.77432	up	yes
TRINITY_DN12030_c0_g3	TRINITY_DN12030_c0_g3_i1;TRINITY_DN12030_c0_g3_i2	GO:0005737(cytoplasm);GO:0009733(response to auxin);GO:0009941(chloroplast envelope);GO:0016874(ligase activity)	1.77134	up	yes
TRINITY_DN11170_c0_g1	TRINITY_DN11170_c0_g1_i1;TRINITY_DN11170_c0_g1_i2	GO:0000079(regulation of cyclin-dependent protein serine/threonine kinase activity);GO:0004693(cyclin-dependent protein serine/threonine kinase activity);GO:0005737(cytoplasm);GO:0007049(cell cycle);GO:0019901(protein kinase binding);GO:0051301(cell division);GO:0051726(regulation of cell cycle)	1.77102	up	yes
TRINITY_DN11270_c0_g1	TRINITY_DN11270_c0_g1_i1	GO:0004190(aspartic-type endopeptidase activity);GO:0006508(proteolysis);GO:0030163(protein catabolic process)	1.75666	up	yes
TRINITY_DN16438_c1_g5	TRINITY_DN16438_c1_g5_i1;TRINITY_DN16438_c1_g5_i2	-	1.75613	up	yes
TRINITY_DN13461_c0_g3	TRINITY_DN13461_c0_g3_i1;TRINITY_DN13461_c0_g3_i2;TRINITY_DN13461_c0_g3_i3	GO:0003723(RNA binding);GO:0004519(endonuclease activity);GO:0005515(protein binding);GO:0005739(mitochondrion);GO:0009451(RNA modification);GO:0009507(chloroplast)	1.75598	up	yes
TRINITY_DN13478_c1_g8	TRINITY_DN13478_c1_g8_i1	GO:0005887(integral component of plasma membrane);GO:0008509(anion transmembrane transporter activity);GO:0051453(regulation of intracellular pH);GO:0098656(anion transmembrane transport)	1.75034	up	yes
TRINITY_DN10975_c0_g2	TRINITY_DN10975_c0_g2_i1	GO:0002237(response to molecule of bacterial origin);GO:0003700(DNA binding transcription factor activity);GO:0005515(protein binding);GO:0005634(nucleus);GO:0006351(transcription, DNA-templated);GO:0006355(regulation of transcription, DNA-templated);GO:0009611(response to wounding);GO:0009751(response to salicylic acid);GO:0010200(response to chitin);GO:0031347(regulation of defense response);GO…	1.73942	up	yes
TRINITY_DN13018_c0_g1	TRINITY_DN13018_c0_g1_i1	GO:0005516(calmodulin binding);GO:0005634(nucleus);GO:0008150(biological_process)	1.73856	up	yes
TRINITY_DN10843_c0_g1	TRINITY_DN10843_c0_g1_i1;TRINITY_DN10843_c0_g1_i2	GO:0030599(pectinesterase activity);GO:0046910(pectinesterase inhibitor activity);GO:0071944(cell periphery)	1.73853	up	yes
TRINITY_DN13181_c0_g1	TRINITY_DN13181_c0_g1_i1;TRINITY_DN13181_c0_g1_i2	GO:0004521(endoribonuclease activity);GO:0005739(mitochondrion);GO:0005773(vacuole);GO:0009082(branched-chain amino acid biosynthetic process);GO:0009097(isoleucine biosynthetic process);GO:0009507(chloroplast);GO:0009536(plastid);GO:0009570(chloroplast stroma);GO:0009579(thylakoid);GO:0009636(response to toxic substance);GO:0009941(chloroplast envelope);GO:0016021(integral component of membrane)…	1.72815	up	yes
TRINITY_DN12897_c0_g5	TRINITY_DN12897_c0_g5_i1	GO:0003674(molecular_function);GO:0005739(mitochondrion);GO:0009733(response to auxin);GO:0009734(auxin-activated signaling pathway);GO:0040008(regulation of growth)	1.72285	up	yes
TRINITY_DN12903_c0_g1	TRINITY_DN12903_c0_g1_i1;TRINITY_DN12903_c0_g1_i10;TRINITY_DN12903_c0_g1_i11;TRINITY_DN12903_c0_g1_i12;TRINITY_DN12903_c0_g1_i13;TRINITY_DN12903_c0_g1_i14;TRINITY_DN12903_c0_g1_i15;TRINITY_DN12903_c0_g1_i16;TRINITY_DN12903_c0_g1_i2;TRINITY_DN12903_c0_g1_i3;TRINITY_DN12903_c0_g1_i4;TRINITY_DN12903_c0_g1_i5;TRINITY_DN12903_c0_g1_i6;TRINITY_DN12903_c0_g1_i7;TRINITY_DN12903_c0_g1_i8;TRINITY_DN12903_c…	GO:0005516(calmodulin binding);GO:0005634(nucleus);GO:0005886(plasma membrane);GO:0008150(biological_process)	1.71598	up	yes
TRINITY_DN12570_c0_g10	TRINITY_DN12570_c0_g10_i1	GO:0009699(phenylpropanoid biosynthetic process);GO:0042349(guiding stereospecific synthesis activity)	1.715	up	yes
TRINITY_DN6654_c0_g1	TRINITY_DN6654_c0_g1_i1	GO:0003677(DNA binding);GO:0003700(DNA binding transcription factor activity);GO:0005515(protein binding);GO:0005634(nucleus);GO:0006351(transcription, DNA-templated);GO:0006355(regulation of transcription, DNA-templated);GO:0009640(photomorphogenesis);GO:0009740(gibberellic acid mediated signaling pathway);GO:0009741(response to brassinosteroid);GO:0009742(brassinosteroid mediated signaling path…	1.71019	up	yes
TRINITY_DN11202_c0_g1	TRINITY_DN11202_c0_g1_i1;TRINITY_DN11202_c0_g1_i2;TRINITY_DN11202_c0_g1_i3;TRINITY_DN11202_c0_g1_i4	GO:0005739(mitochondrion);GO:0046474(glycerophospholipid biosynthetic process)	1.70968	up	yes
TRINITY_DN11331_c1_g4	TRINITY_DN11331_c1_g4_i1	GO:0004674(protein serine/threonine kinase activity);GO:0005524(ATP binding);GO:0005886(plasma membrane);GO:0016021(integral component of membrane);GO:0016301(kinase activity);GO:0046777(protein autophosphorylation)	1.69591	up	yes
TRINITY_DN14086_c1_g2	TRINITY_DN14086_c1_g2_i1	GO:0004672(protein kinase activity);GO:0005524(ATP binding);GO:0005576(extracellular region);GO:0005618(cell wall);GO:0006468(protein phosphorylation);GO:0009505(plant-type cell wall);GO:0009737(response to abscisic acid);GO:0009739(response to gibberellin);GO:0009740(gibberellic acid mediated signaling pathway);GO:0009741(response to brassinosteroid);GO:0009826(unidimensional cell growth);GO:001…	1.68186	up	yes
TRINITY_DN11783_c0_g1	TRINITY_DN11783_c0_g1_i1;TRINITY_DN11783_c0_g1_i2;TRINITY_DN11783_c0_g1_i3	GO:0000156(phosphorelay response regulator activity);GO:0000160(phosphorelay signal transduction system);GO:0005515(protein binding);GO:0005634(nucleus);GO:0005737(cytoplasm);GO:0006351(transcription, DNA-templated);GO:0006355(regulation of transcription, DNA-templated);GO:0007623(circadian rhythm);GO:0009735(response to cytokinin);GO:0009736(cytokinin-activated signaling pathway);GO:0010114(resp…	1.67961	up	yes
TRINITY_DN12000_c0_g1	TRINITY_DN12000_c0_g1_i1;TRINITY_DN12000_c0_g1_i2;TRINITY_DN12000_c0_g1_i3;TRINITY_DN12000_c0_g1_i4	-	1.67863	up	yes
TRINITY_DN16382_c1_g1	TRINITY_DN16382_c1_g1_i1;TRINITY_DN16382_c1_g1_i10;TRINITY_DN16382_c1_g1_i11;TRINITY_DN16382_c1_g1_i12;TRINITY_DN16382_c1_g1_i13;TRINITY_DN16382_c1_g1_i14;TRINITY_DN16382_c1_g1_i15;TRINITY_DN16382_c1_g1_i2;TRINITY_DN16382_c1_g1_i3;TRINITY_DN16382_c1_g1_i4;TRINITY_DN16382_c1_g1_i5;TRINITY_DN16382_c1_g1_i6;TRINITY_DN16382_c1_g1_i7;TRINITY_DN16382_c1_g1_i8;TRINITY_DN16382_c1_g1_i9	GO:0005576(extracellular region);GO:0016614(oxidoreductase activity, acting on CH-OH group of donors);GO:0016832(aldehyde-lyase activity);GO:0050660(flavin adenine dinucleotide binding);GO:0055114(oxidation-reduction process)	1.6785	up	yes
TRINITY_DN9408_c0_g1	TRINITY_DN9408_c0_g1_i1;TRINITY_DN9408_c0_g1_i2	-	1.67449	up	yes
TRINITY_DN15153_c0_g4	TRINITY_DN15153_c0_g4_i1;TRINITY_DN15153_c0_g4_i2	GO:0004672(protein kinase activity);GO:0004674(protein serine/threonine kinase activity);GO:0005524(ATP binding);GO:0005886(plasma membrane);GO:0006468(protein phosphorylation);GO:0007169(transmembrane receptor protein tyrosine kinase signaling pathway);GO:0016021(integral component of membrane);GO:0016301(kinase activity);GO:0016310(phosphorylation)	1.67077	up	yes
TRINITY_DN16203_c0_g3	TRINITY_DN16203_c0_g3_i1;TRINITY_DN16203_c0_g3_i2	GO:0005576(extracellular region)	1.6693	up	yes
TRINITY_DN13075_c1_g3	TRINITY_DN13075_c1_g3_i1	GO:0003674(molecular_function);GO:0005739(mitochondrion);GO:0005886(plasma membrane);GO:0008150(biological_process);GO:0016021(integral component of membrane)	1.66679	up	yes
TRINITY_DN11775_c0_g4	TRINITY_DN11775_c0_g4_i1;TRINITY_DN11775_c0_g4_i2	GO:0000156(phosphorelay response regulator activity);GO:0000160(phosphorelay signal transduction system);GO:0005515(protein binding);GO:0005634(nucleus);GO:0006351(transcription, DNA-templated);GO:0006355(regulation of transcription, DNA-templated);GO:0007623(circadian rhythm);GO:0009735(response to cytokinin);GO:0009736(cytokinin-activated signaling pathway)	1.66385	up	yes
TRINITY_DN12174_c0_g5	TRINITY_DN12174_c0_g5_i1;TRINITY_DN12174_c0_g5_i2	GO:0004527(exonuclease activity);GO:0005634(nucleus);GO:0008150(biological_process);GO:0016021(integral component of membrane)	1.66385	up	yes
TRINITY_DN11228_c0_g4	TRINITY_DN11228_c0_g4_i1;TRINITY_DN11228_c0_g4_i2	GO:0051213(dioxygenase activity)	1.66237	up	yes
TRINITY_DN12914_c0_g10	TRINITY_DN12914_c0_g10_i1;TRINITY_DN12914_c0_g10_i2	GO:0003824(catalytic activity);GO:0003962(cystathionine gamma-synthase activity);GO:0004123(cystathionine gamma-lyase activity);GO:0005737(cytoplasm);GO:0005829(cytosol);GO:0006520(cellular amino acid metabolic process);GO:0009970(cellular response to sulfate starvation);GO:0018826(methionine gamma-lyase activity);GO:0019343(cysteine biosynthetic process via cystathionine);GO:0019346(transsulfura…	1.65926	up	yes
TRINITY_DN16125_c1_g6	TRINITY_DN16125_c1_g6_i1	GO:0009507(chloroplast);GO:0016491(oxidoreductase activity);GO:0055114(oxidation-reduction process)	1.65437	up	yes
TRINITY_DN10865_c0_g4	TRINITY_DN10865_c0_g4_i1	GO:0016709(oxidoreductase activity, acting on paired donors, with incorporation or reduction of molecular oxygen, NAD(P)H as one donor, and incorporation of one atom of oxygen);GO:0035336(long-chain fatty-acyl-CoA metabolic process)	1.65338	up	yes
TRINITY_DN10426_c0_g1	TRINITY_DN10426_c0_g1_i1;TRINITY_DN10426_c0_g1_i10;TRINITY_DN10426_c0_g1_i2;TRINITY_DN10426_c0_g1_i3;TRINITY_DN10426_c0_g1_i4;TRINITY_DN10426_c0_g1_i5;TRINITY_DN10426_c0_g1_i6;TRINITY_DN10426_c0_g1_i7;TRINITY_DN10426_c0_g1_i8;TRINITY_DN10426_c0_g1_i9	-	1.65303	up	yes
TRINITY_DN13702_c0_g5	TRINITY_DN13702_c0_g5_i1;TRINITY_DN13702_c0_g5_i2	GO:0004674(protein serine/threonine kinase activity);GO:0005829(cytosol);GO:0006468(protein phosphorylation);GO:0035556(intracellular signal transduction)	1.65087	up	yes
TRINITY_DN12091_c0_g2	TRINITY_DN12091_c0_g2_i1	GO:0005634(nucleus);GO:0052689(carboxylic ester hydrolase activity)	1.65042	up	yes
TRINITY_DN14758_c0_g2	TRINITY_DN14758_c0_g2_i1;TRINITY_DN14758_c0_g2_i2	GO:0030599(pectinesterase activity);GO:0046910(pectinesterase inhibitor activity);GO:0071944(cell periphery)	1.64781	up	yes
TRINITY_DN14607_c0_g1	TRINITY_DN14607_c0_g1_i1;TRINITY_DN14607_c0_g1_i2;TRINITY_DN14607_c0_g1_i3;TRINITY_DN14607_c0_g1_i4	GO:0004066(asparagine synthase (glutamine-hydrolyzing) activity);GO:0005829(cytosol);GO:0006529(asparagine biosynthetic process);GO:0006541(glutamine metabolic process);GO:0009646(response to absence of light);GO:0042803(protein homodimerization activity)	1.64214	up	yes
TRINITY_DN14354_c1_g3	TRINITY_DN14354_c1_g3_i1;TRINITY_DN14354_c1_g3_i2;TRINITY_DN14354_c1_g3_i3	GO:0005634(nucleus);GO:0008757(S-adenosylmethionine-dependent methyltransferase activity);GO:0032259(methylation)	1.63953	up	yes
TRINITY_DN12253_c0_g10	TRINITY_DN12253_c0_g10_i1	GO:0005634(nucleus);GO:0006952(defense response);GO:0007165(signal transduction);GO:0016021(integral component of membrane);GO:0043531(ADP binding)	1.63953	up	yes
TRINITY_DN12622_c0_g1	TRINITY_DN12622_c0_g1_i1;TRINITY_DN12622_c0_g1_i2;TRINITY_DN12622_c0_g1_i3;TRINITY_DN12622_c0_g1_i4	GO:0000103(sulfate assimilation);GO:0005737(cytoplasm);GO:0006457(protein folding);GO:0015035(protein disulfide oxidoreductase activity);GO:0016671(oxidoreductase activity, acting on a sulfur group of donors, disulfide as acceptor);GO:0034599(cellular response to oxidative stress);GO:0045454(cell redox homeostasis);GO:0055114(oxidation-reduction process)	1.63633	up	yes
TRINITY_DN14213_c0_g6	TRINITY_DN14213_c0_g6_i1;TRINITY_DN14213_c0_g6_i2	GO:0003674(molecular_function);GO:0005634(nucleus);GO:0008150(biological_process)	1.63604	up	yes
TRINITY_DN14380_c0_g4	TRINITY_DN14380_c0_g4_i1	-	1.63572	up	yes
TRINITY_DN11657_c0_g6	TRINITY_DN11657_c0_g6_i1	GO:0003674(molecular_function);GO:0005634(nucleus);GO:0008150(biological_process)	1.63512	up	yes
TRINITY_DN15726_c0_g4	TRINITY_DN15726_c0_g4_i1;TRINITY_DN15726_c0_g4_i2	GO:0000981(RNA polymerase II transcription factor activity, sequence-specific DNA binding);GO:0003677(DNA binding);GO:0003700(DNA binding transcription factor activity);GO:0005634(nucleus);GO:0006351(transcription, DNA-templated);GO:0006355(regulation of transcription, DNA-templated);GO:0007275(multicellular organism development);GO:0009414(response to water deprivation);GO:0009651(response to sa…	1.6351	up	yes
TRINITY_DN14612_c0_g4	TRINITY_DN14612_c0_g4_i1	GO:0005576(extracellular region);GO:0016829(lyase activity);GO:0030570(pectate lyase activity);GO:0045490(pectin catabolic process);GO:0046872(metal ion binding)	1.63392	up	yes
TRINITY_DN13991_c0_g3	TRINITY_DN13991_c0_g3_i1	GO:0005576(extracellular region);GO:0016829(lyase activity);GO:0030570(pectate lyase activity);GO:0045490(pectin catabolic process);GO:0046872(metal ion binding)	1.62682	up	yes
TRINITY_DN16224_c1_g3	TRINITY_DN16224_c1_g3_i1;TRINITY_DN16224_c1_g3_i2	GO:0004675(transmembrane receptor protein serine/threonine kinase activity);GO:0005524(ATP binding);GO:0005768(endosome);GO:0005886(plasma membrane);GO:0006468(protein phosphorylation);GO:0007166(cell surface receptor signaling pathway);GO:0010008(endosome membrane);GO:0010089(xylem development);GO:0012505(endomembrane system);GO:0016021(integral component of membrane);GO:0016301(kinase activity)…	1.62656	up	yes
TRINITY_DN12603_c0_g4	TRINITY_DN12603_c0_g4_i1;TRINITY_DN12603_c0_g4_i2;TRINITY_DN12603_c0_g4_i3	GO:0005887(integral component of plasma membrane);GO:0009705(plant-type vacuole membrane);GO:0009992(cellular water homeostasis);GO:0015250(water channel activity);GO:0015254(glycerol channel activity);GO:0034220(ion transmembrane transport);GO:0042807(central vacuole)	1.62572	up	yes
TRINITY_DN13443_c0_g5	TRINITY_DN13443_c0_g5_i1;TRINITY_DN13443_c0_g5_i2;TRINITY_DN13443_c0_g5_i3;TRINITY_DN13443_c0_g5_i4;TRINITY_DN13443_c0_g5_i5	GO:0005737(cytoplasm);GO:0009143(nucleoside triphosphate catabolic process);GO:0046872(metal ion binding);GO:0047429(nucleoside-triphosphate diphosphatase activity)	1.621	up	yes
TRINITY_DN15077_c0_g8	TRINITY_DN15077_c0_g8_i1	-	1.6192	up	yes
TRINITY_DN15969_c0_g3	TRINITY_DN15969_c0_g3_i1	GO:0016020(membrane);GO:0016709(oxidoreductase activity, acting on paired donors, with incorporation or reduction of molecular oxygen, NAD(P)H as one donor, and incorporation of one atom of oxygen);GO:0044550(secondary metabolite biosynthetic process)	1.60701	up	yes
TRINITY_DN12962_c0_g1	TRINITY_DN12962_c0_g1_i1;TRINITY_DN12962_c0_g1_i2;TRINITY_DN12962_c0_g1_i3;TRINITY_DN12962_c0_g1_i4;TRINITY_DN12962_c0_g1_i5;TRINITY_DN12962_c0_g1_i6	GO:0004364(glutathione transferase activity);GO:0005737(cytoplasm);GO:0006749(glutathione metabolic process);GO:0009407(toxin catabolic process)	1.60602	up	yes
TRINITY_DN15791_c1_g2	TRINITY_DN15791_c1_g2_i1;TRINITY_DN15791_c1_g2_i2;TRINITY_DN15791_c1_g2_i3;TRINITY_DN15791_c1_g2_i4	GO:0004674(protein serine/threonine kinase activity);GO:0005829(cytosol);GO:0006468(protein phosphorylation);GO:0035556(intracellular signal transduction)	1.60504	up	yes
TRINITY_DN14598_c0_g4	TRINITY_DN14598_c0_g4_i1	GO:0000977(RNA polymerase II regulatory region sequence-specific DNA binding);GO:0001085(RNA polymerase II transcription factor binding);GO:0001228(transcriptional activator activity, RNA polymerase II transcription regulatory region sequence-specific DNA binding);GO:0003682(chromatin binding);GO:0005634(nucleus);GO:0005667(transcription factor complex);GO:0030154(cell differentiation)	1.60461	up	yes
TRINITY_DN9768_c0_g1	TRINITY_DN9768_c0_g1_i1;TRINITY_DN9768_c0_g1_i2	GO:0005576(extracellular region);GO:0005886(plasma membrane);GO:0006869(lipid transport);GO:0008289(lipid binding)	1.60268	up	yes
TRINITY_DN15228_c2_g5	TRINITY_DN15228_c2_g5_i1	GO:0004672(protein kinase activity);GO:0004674(protein serine/threonine kinase activity);GO:0005524(ATP binding);GO:0005829(cytosol);GO:0005886(plasma membrane);GO:0006468(protein phosphorylation);GO:0007169(transmembrane receptor protein tyrosine kinase signaling pathway);GO:0016021(integral component of membrane)	1.60141	up	yes
TRINITY_DN15550_c1_g4	TRINITY_DN15550_c1_g4_i1	GO:0004674(protein serine/threonine kinase activity);GO:0005524(ATP binding);GO:0005886(plasma membrane);GO:0016301(kinase activity);GO:0016787(hydrolase activity);GO:0046777(protein autophosphorylation)	1.5995	up	yes
TRINITY_DN12846_c0_g7	TRINITY_DN12846_c0_g7_i1	GO:0005215(transporter activity);GO:0005886(plasma membrane);GO:0006857(oligopeptide transport);GO:0010336(gibberellic acid homeostasis);GO:0016020(membrane);GO:0016021(integral component of membrane);GO:0022857(transmembrane transporter activity);GO:0042128(nitrate assimilation);GO:0055085(transmembrane transport);GO:0097708(intracellular vesicle)	1.5921	up	yes
TRINITY_DN13727_c0_g2	TRINITY_DN13727_c0_g2_i1	GO:0005618(cell wall);GO:0033609(oxalate metabolic process);GO:0046564(oxalate decarboxylase activity)	1.58898	up	yes
TRINITY_DN14090_c0_g1	TRINITY_DN14090_c0_g1_i1;TRINITY_DN14090_c0_g1_i2	GO:0001558(regulation of cell growth);GO:0005524(ATP binding);GO:0005576(extracellular region);GO:0005739(mitochondrion);GO:0005886(plasma membrane);GO:0006468(protein phosphorylation);GO:0009664(plant-type cell wall organization);GO:0009944(polarity specification of adaxial/abaxial axis);GO:0009965(leaf morphogenesis);GO:0010087(phloem or xylem histogenesis);GO:0010103(stomatal complex morphogen…	1.58321	up	yes
TRINITY_DN11953_c0_g5	TRINITY_DN11953_c0_g5_i1;TRINITY_DN11953_c0_g5_i2	-	1.58081	up	yes
TRINITY_DN10229_c0_g1	TRINITY_DN10229_c0_g1_i1;TRINITY_DN10229_c0_g1_i2	GO:0005576(extracellular region);GO:0016042(lipid catabolic process);GO:0016298(lipase activity);GO:0016746(transferase activity, transferring acyl groups);GO:0019953(sexual reproduction);GO:0052689(carboxylic ester hydrolase activity)	1.58071	up	yes
TRINITY_DN12263_c0_g1	TRINITY_DN12263_c0_g1_i1;TRINITY_DN12263_c0_g1_i2	GO:0003674(molecular_function);GO:0005634(nucleus)	1.57919	up	yes
TRINITY_DN12212_c0_g5	TRINITY_DN12212_c0_g5_i1;TRINITY_DN12212_c0_g5_i2	-	1.5781	up	yes
TRINITY_DN15872_c0_g3	TRINITY_DN15872_c0_g3_i1;TRINITY_DN15872_c0_g3_i2;TRINITY_DN15872_c0_g3_i3	GO:0003674(molecular_function);GO:0005575(cellular_component);GO:0008150(biological_process)	1.57767	up	yes
TRINITY_DN14353_c2_g3	TRINITY_DN14353_c2_g3_i1	-	1.5708	up	yes
TRINITY_DN15151_c0_g2	TRINITY_DN15151_c0_g2_i1	GO:0005737(cytoplasm);GO:0006607(NLS-bearing protein import into nucleus);GO:0006610(ribosomal protein import into nucleus);GO:0008139(nuclear localization sequence binding);GO:0031965(nuclear membrane);GO:0034399(nuclear periphery)	1.56845	up	yes
TRINITY_DN13779_c0_g5	TRINITY_DN13779_c0_g5_i1;TRINITY_DN13779_c0_g5_i2	GO:0004497(monooxygenase activity);GO:0055114(oxidation-reduction process)	1.56363	up	yes
TRINITY_DN11243_c0_g7	TRINITY_DN11243_c0_g7_i1;TRINITY_DN11243_c0_g7_i2	GO:0003674(molecular_function);GO:0005634(nucleus);GO:0005737(cytoplasm);GO:0009860(pollen tube growth);GO:0040008(regulation of growth)	1.56342	up	yes
TRINITY_DN9031_c0_g1	TRINITY_DN9031_c0_g1_i1	GO:0004867(serine-type endopeptidase inhibitor activity);GO:0005576(extracellular region);GO:0005618(cell wall);GO:0006508(proteolysis);GO:0008233(peptidase activity);GO:0009611(response to wounding);GO:0050832(defense response to fungus)	1.55296	up	yes
TRINITY_DN11822_c0_g7	TRINITY_DN11822_c0_g7_i1;TRINITY_DN11822_c0_g7_i2	GO:0016104(triterpenoid biosynthetic process);GO:0042300(beta-amyrin synthase activity)	1.55057	up	yes
TRINITY_DN16399_c1_g1	TRINITY_DN16399_c1_g1_i1;TRINITY_DN16399_c1_g1_i2;TRINITY_DN16399_c1_g1_i3	-	1.54913	up	yes
TRINITY_DN12002_c0_g4	TRINITY_DN12002_c0_g4_i1	-	1.54902	up	yes
TRINITY_DN11507_c0_g4	TRINITY_DN11507_c0_g4_i1	GO:0000159(protein phosphatase type 2A complex);GO:0005737(cytoplasm);GO:0007165(signal transduction);GO:0019888(protein phosphatase regulator activity)	1.54341	up	yes
TRINITY_DN13666_c0_g2	TRINITY_DN13666_c0_g2_i1;TRINITY_DN13666_c0_g2_i2;TRINITY_DN13666_c0_g2_i3	-	1.53899	up	yes
TRINITY_DN13441_c0_g1	TRINITY_DN13441_c0_g1_i1;TRINITY_DN13441_c0_g1_i10;TRINITY_DN13441_c0_g1_i2;TRINITY_DN13441_c0_g1_i3;TRINITY_DN13441_c0_g1_i4;TRINITY_DN13441_c0_g1_i5;TRINITY_DN13441_c0_g1_i6;TRINITY_DN13441_c0_g1_i7;TRINITY_DN13441_c0_g1_i8;TRINITY_DN13441_c0_g1_i9	-	1.52809	up	yes
TRINITY_DN15457_c0_g5	TRINITY_DN15457_c0_g5_i1;TRINITY_DN15457_c0_g5_i2	GO:0004526(ribonuclease P activity);GO:0005655(nucleolar ribonuclease P complex);GO:0090502(RNA phosphodiester bond hydrolysis, endonucleolytic)	1.52681	up	yes
TRINITY_DN13632_c0_g1	TRINITY_DN13632_c0_g1_i1	GO:0004672(protein kinase activity);GO:0004674(protein serine/threonine kinase activity);GO:0005524(ATP binding);GO:0005886(plasma membrane);GO:0006468(protein phosphorylation);GO:0007169(transmembrane receptor protein tyrosine kinase signaling pathway);GO:0016021(integral component of membrane)	1.52569	up	yes
TRINITY_DN10250_c0_g1	TRINITY_DN10250_c0_g1_i1;TRINITY_DN10250_c0_g1_i2;TRINITY_DN10250_c0_g1_i3	GO:0003674(molecular_function);GO:0005739(mitochondrion);GO:0008150(biological_process);GO:0016021(integral component of membrane)	1.51415	up	yes
TRINITY_DN12526_c1_g2	TRINITY_DN12526_c1_g2_i1;TRINITY_DN12526_c1_g2_i2	GO:0005886(plasma membrane);GO:0016301(kinase activity);GO:0016310(phosphorylation)	1.51393	up	yes
TRINITY_DN11865_c0_g2	TRINITY_DN11865_c0_g2_i1;TRINITY_DN11865_c0_g2_i2;TRINITY_DN11865_c0_g2_i3;TRINITY_DN11865_c0_g2_i4	GO:0003674(molecular_function);GO:0005634(nucleus);GO:0051513(regulation of monopolar cell growth)	1.51353	up	yes
TRINITY_DN13295_c0_g1	TRINITY_DN13295_c0_g1_i1;TRINITY_DN13295_c0_g1_i2	GO:0004857(enzyme inhibitor activity)	1.50967	up	yes
TRINITY_DN11969_c1_g4	TRINITY_DN11969_c1_g4_i1	-	1.50744	up	yes
TRINITY_DN13006_c1_g3	TRINITY_DN13006_c1_g3_i1;TRINITY_DN13006_c1_g3_i2	GO:0003674(molecular_function);GO:0005634(nucleus);GO:0008150(biological_process)	1.50744	up	yes
TRINITY_DN16620_c1_g2	TRINITY_DN16620_c1_g2_i1;TRINITY_DN16620_c1_g2_i2;TRINITY_DN16620_c1_g2_i3	GO:0001709(cell fate determination);GO:0005576(extracellular region);GO:0016757(transferase activity, transferring glycosyl groups)	1.50413	up	yes
TRINITY_DN10230_c0_g1	TRINITY_DN10230_c0_g1_i1;TRINITY_DN10230_c0_g1_i2;TRINITY_DN10230_c0_g1_i3;TRINITY_DN10230_c0_g1_i4	GO:0000981(RNA polymerase II transcription factor activity, sequence-specific DNA binding);GO:0003677(DNA binding);GO:0003700(DNA binding transcription factor activity);GO:0005634(nucleus);GO:0006351(transcription, DNA-templated);GO:0006355(regulation of transcription, DNA-templated);GO:0007275(multicellular organism development);GO:0009414(response to water deprivation);GO:0009651(response to sa…	1.4949	up	yes
TRINITY_DN16552_c0_g8	TRINITY_DN16552_c0_g8_i1	GO:0005634(nucleus);GO:0005737(cytoplasm);GO:0005739(mitochondrion);GO:0016787(hydrolase activity);GO:0016818(hydrolase activity, acting on acid anhydrides, in phosphorus-containing anhydrides);GO:0046872(metal ion binding)	1.49373	up	yes
TRINITY_DN13586_c1_g3	TRINITY_DN13586_c1_g3_i1;TRINITY_DN13586_c1_g3_i2	GO:0005576(extracellular region);GO:0005618(cell wall);GO:0006949(syncytium formation);GO:0009664(plant-type cell wall organization);GO:0009826(unidimensional cell growth);GO:0009828(plant-type cell wall loosening);GO:0009831(plant-type cell wall modification involved in multidimensional cell growth);GO:0016020(membrane)	1.4917	up	yes
TRINITY_DN13428_c0_g1	TRINITY_DN13428_c0_g1_i1;TRINITY_DN13428_c0_g1_i10;TRINITY_DN13428_c0_g1_i11;TRINITY_DN13428_c0_g1_i12;TRINITY_DN13428_c0_g1_i13;TRINITY_DN13428_c0_g1_i14;TRINITY_DN13428_c0_g1_i2;TRINITY_DN13428_c0_g1_i3;TRINITY_DN13428_c0_g1_i4;TRINITY_DN13428_c0_g1_i5;TRINITY_DN13428_c0_g1_i6;TRINITY_DN13428_c0_g1_i7;TRINITY_DN13428_c0_g1_i8;TRINITY_DN13428_c0_g1_i9	GO:0003700(DNA binding transcription factor activity);GO:0005634(nucleus);GO:0006952(defense response);GO:0009685(gibberellin metabolic process)	1.48938	up	yes
TRINITY_DN12259_c1_g8	TRINITY_DN12259_c1_g8_i1	GO:0004553(hydrolase activity, hydrolyzing O-glycosyl compounds);GO:0005576(extracellular region);GO:0005886(plasma membrane);GO:0008810(cellulase activity);GO:0030245(cellulose catabolic process);GO:0071555(cell wall organization)	1.48794	up	yes
TRINITY_DN14868_c0_g2	TRINITY_DN14868_c0_g2_i1	GO:0003674(molecular_function);GO:0005615(extracellular space);GO:0005618(cell wall);GO:0005794(Golgi apparatus);GO:0005829(cytosol);GO:0008150(biological_process);GO:0009505(plant-type cell wall);GO:0009506(plasmodesma);GO:0009507(chloroplast);GO:0048046(apoplast)	1.48085	up	yes
TRINITY_DN14121_c0_g7	TRINITY_DN14121_c0_g7_i1	GO:0003674(molecular_function);GO:0005576(extracellular region);GO:0005773(vacuole);GO:0007155(cell adhesion)	1.47977	up	yes
TRINITY_DN12678_c1_g4	TRINITY_DN12678_c1_g4_i1;TRINITY_DN12678_c1_g4_i10;TRINITY_DN12678_c1_g4_i11;TRINITY_DN12678_c1_g4_i12;TRINITY_DN12678_c1_g4_i13;TRINITY_DN12678_c1_g4_i14;TRINITY_DN12678_c1_g4_i15;TRINITY_DN12678_c1_g4_i16;TRINITY_DN12678_c1_g4_i2;TRINITY_DN12678_c1_g4_i3;TRINITY_DN12678_c1_g4_i4;TRINITY_DN12678_c1_g4_i5;TRINITY_DN12678_c1_g4_i6;TRINITY_DN12678_c1_g4_i7;TRINITY_DN12678_c1_g4_i8;TRINITY_DN12678_c…	GO:0005576(extracellular region);GO:0016042(lipid catabolic process);GO:0016788(hydrolase activity, acting on ester bonds);GO:0052689(carboxylic ester hydrolase activity)	1.47493	up	yes
TRINITY_DN16201_c1_g1	TRINITY_DN16201_c1_g1_i1	-	1.47255	up	yes
TRINITY_DN13746_c0_g1	TRINITY_DN13746_c0_g1_i1	GO:0005515(protein binding);GO:0008661(1-deoxy-D-xylulose-5-phosphate synthase activity);GO:0009228(thiamine biosynthetic process);GO:0009507(chloroplast);GO:0009570(chloroplast stroma);GO:0015995(chlorophyll biosynthetic process);GO:0016114(terpenoid biosynthetic process);GO:0019288(isopentenyl diphosphate biosynthetic process, methylerythritol 4-phosphate pathway);GO:0046872(metal ion binding);…	1.47232	up	yes
TRINITY_DN15318_c1_g4	TRINITY_DN15318_c1_g4_i1	GO:0006952(defense response);GO:0016042(lipid catabolic process);GO:0016787(hydrolase activity);GO:0045735(nutrient reservoir activity)	1.46807	up	yes
TRINITY_DN9096_c0_g1	TRINITY_DN9096_c0_g1_i1	GO:0016021(integral component of membrane)	1.46538	up	yes
TRINITY_DN7563_c0_g1	TRINITY_DN7563_c0_g1_i1	-	1.46522	up	yes
TRINITY_DN15102_c1_g2	TRINITY_DN15102_c1_g2_i1;TRINITY_DN15102_c1_g2_i2;TRINITY_DN15102_c1_g2_i3	-	1.46136	up	yes
TRINITY_DN13538_c1_g6	TRINITY_DN13538_c1_g6_i1	GO:0005634(nucleus);GO:0005774(vacuolar membrane);GO:0005886(plasma membrane);GO:0009507(chloroplast);GO:0016020(membrane)	1.46065	up	yes
TRINITY_DN11625_c1_g2	TRINITY_DN11625_c1_g2_i1;TRINITY_DN11625_c1_g2_i2;TRINITY_DN11625_c1_g2_i3	GO:0005737(cytoplasm);GO:0008757(S-adenosylmethionine-dependent methyltransferase activity);GO:0032259(methylation)	1.4601	up	yes
TRINITY_DN13955_c0_g5	TRINITY_DN13955_c0_g5_i1;TRINITY_DN13955_c0_g5_i2	GO:0004693(cyclin-dependent protein serine/threonine kinase activity);GO:0005515(protein binding);GO:0005634(nucleus);GO:0007049(cell cycle);GO:0010444(guard mother cell differentiation);GO:0042127(regulation of cell proliferation);GO:0048316(seed development);GO:0051301(cell division);GO:0051726(regulation of cell cycle)	1.45647	up	yes
TRINITY_DN14539_c0_g3	TRINITY_DN14539_c0_g3_i1	GO:0010200(response to chitin);GO:0043161(proteasome-mediated ubiquitin-dependent protein catabolic process);GO:0061630(ubiquitin protein ligase activity)	1.45474	up	yes
TRINITY_DN15130_c1_g2	TRINITY_DN15130_c1_g2_i1;TRINITY_DN15130_c1_g2_i2;TRINITY_DN15130_c1_g2_i3;TRINITY_DN15130_c1_g2_i4;TRINITY_DN15130_c1_g2_i5;TRINITY_DN15130_c1_g2_i6	-	1.45072	up	yes
TRINITY_DN12363_c0_g3	TRINITY_DN12363_c0_g3_i1	GO:0004672(protein kinase activity);GO:0004674(protein serine/threonine kinase activity);GO:0005524(ATP binding);GO:0005886(plasma membrane);GO:0006468(protein phosphorylation);GO:0007169(transmembrane receptor protein tyrosine kinase signaling pathway);GO:0016021(integral component of membrane)	1.45046	up	yes
TRINITY_DN14391_c0_g3	TRINITY_DN14391_c0_g3_i1;TRINITY_DN14391_c0_g3_i2;TRINITY_DN14391_c0_g3_i3	GO:0010143(cutin biosynthetic process);GO:0016020(membrane);GO:0016311(dephosphorylation);GO:0016791(phosphatase activity);GO:0090447(glycerol-3-phosphate 2-O-acyltransferase activity)	1.43947	up	yes
TRINITY_DN9661_c0_g1	TRINITY_DN9661_c0_g1_i1	GO:0005737(cytoplasm);GO:0008757(S-adenosylmethionine-dependent methyltransferase activity);GO:0032259(methylation)	1.43867	up	yes
TRINITY_DN16203_c0_g4	TRINITY_DN16203_c0_g4_i1	GO:0005576(extracellular region);GO:0019825(oxygen binding)	1.43387	up	yes
TRINITY_DN13663_c0_g6	TRINITY_DN13663_c0_g6_i1	-	1.43367	up	yes
TRINITY_DN13877_c0_g1	TRINITY_DN13877_c0_g1_i1;TRINITY_DN13877_c0_g1_i2;TRINITY_DN13877_c0_g1_i3;TRINITY_DN13877_c0_g1_i4;TRINITY_DN13877_c0_g1_i5;TRINITY_DN13877_c0_g1_i6	GO:0005737(cytoplasm);GO:0008150(biological_process)	1.42853	up	yes
TRINITY_DN10312_c0_g1	TRINITY_DN10312_c0_g1_i1	GO:0005737(cytoplasm);GO:0008150(biological_process);GO:0016021(integral component of membrane);GO:0016740(transferase activity)	1.42401	up	yes
TRINITY_DN13337_c0_g2	TRINITY_DN13337_c0_g2_i1	GO:0005634(nucleus);GO:0046983(protein dimerization activity)	1.42239	up	yes
TRINITY_DN15797_c0_g4	TRINITY_DN15797_c0_g4_i1;TRINITY_DN15797_c0_g4_i2	GO:0005634(nucleus);GO:0016301(kinase activity);GO:0016310(phosphorylation)	1.42206	up	yes
TRINITY_DN11901_c0_g2	TRINITY_DN11901_c0_g2_i1;TRINITY_DN11901_c0_g2_i2	GO:0004190(aspartic-type endopeptidase activity);GO:0006508(proteolysis);GO:0030163(protein catabolic process)	1.42127	up	yes
TRINITY_DN12248_c0_g2	TRINITY_DN12248_c0_g2_i1;TRINITY_DN12248_c0_g2_i2;TRINITY_DN12248_c0_g2_i3;TRINITY_DN12248_c0_g2_i4;TRINITY_DN12248_c0_g2_i5	-	1.41643	up	yes
TRINITY_DN15177_c0_g2	TRINITY_DN15177_c0_g2_i1	GO:0009507(chloroplast);GO:0016301(kinase activity);GO:0016310(phosphorylation)	1.41575	up	yes
TRINITY_DN12718_c0_g5	TRINITY_DN12718_c0_g5_i1	-	1.41568	up	yes
TRINITY_DN5368_c0_g2	TRINITY_DN5368_c0_g2_i1	GO:0000166(nucleotide binding);GO:0000287(magnesium ion binding);GO:0001889(liver development);GO:0003824(catalytic activity);GO:0004743(pyruvate kinase activity);GO:0005515(protein binding);GO:0005524(ATP binding);GO:0005634(nucleus);GO:0005737(cytoplasm);GO:0005739(mitochondrion);GO:0005829(cytosol);GO:0005929(cilium);GO:0006006(glucose metabolic process);GO:0006096(glycolytic process);GO:00067…	1.41447	up	yes
TRINITY_DN13586_c1_g7	TRINITY_DN13586_c1_g7_i1	GO:0005199(structural constituent of cell wall);GO:0005576(extracellular region);GO:0005618(cell wall);GO:0006949(syncytium formation);GO:0009505(plant-type cell wall);GO:0009664(plant-type cell wall organization);GO:0009826(unidimensional cell growth);GO:0009828(plant-type cell wall loosening);GO:0009831(plant-type cell wall modification involved in multidimensional cell growth);GO:0016020(membr…	1.41235	up	yes
TRINITY_DN10896_c0_g4	TRINITY_DN10896_c0_g4_i1;TRINITY_DN10896_c0_g4_i2;TRINITY_DN10896_c0_g4_i3	GO:0000502(proteasome complex);GO:0004298(threonine-type endopeptidase activity);GO:0005634(nucleus);GO:0005737(cytoplasm);GO:0005773(vacuole);GO:0005839(proteasome core complex);GO:0006511(ubiquitin-dependent protein catabolic process);GO:0008233(peptidase activity);GO:0009507(chloroplast);GO:0019773(proteasome core complex, alpha-subunit complex)	1.41124	up	yes
TRINITY_DN13922_c0_g1	TRINITY_DN13922_c0_g1_i1;TRINITY_DN13922_c0_g1_i2;TRINITY_DN13922_c0_g1_i3;TRINITY_DN13922_c0_g1_i4;TRINITY_DN13922_c0_g1_i5	GO:0005178(integrin binding);GO:0005509(calcium ion binding);GO:0005544(calcium-dependent phospholipid binding);GO:0005635(nuclear envelope);GO:0005789(endoplasmic reticulum membrane);GO:0005829(cytosol);GO:0005886(plasma membrane);GO:0006874(cellular calcium ion homeostasis);GO:0006914(autophagy);GO:0007599(hemostasis);GO:0008283(cell proliferation);GO:0008360(regulation of cell shape);GO:000965…	1.41001	up	yes
TRINITY_DN8995_c0_g1	TRINITY_DN8995_c0_g1_i1;TRINITY_DN8995_c0_g1_i2	-	1.40967	up	yes
TRINITY_DN12002_c0_g5	TRINITY_DN12002_c0_g5_i1;TRINITY_DN12002_c0_g5_i2	-	1.40589	up	yes
TRINITY_DN12244_c0_g1	TRINITY_DN12244_c0_g1_i1;TRINITY_DN12244_c0_g1_i2	GO:0003674(molecular_function);GO:0005886(plasma membrane);GO:0008150(biological_process);GO:0031225(anchored component of membrane)	1.40472	up	yes
TRINITY_DN13501_c0_g1	TRINITY_DN13501_c0_g1_i1	GO:0005516(calmodulin binding);GO:0005634(nucleus);GO:0005886(plasma membrane);GO:0008150(biological_process)	1.40308	up	yes
TRINITY_DN16161_c0_g8	TRINITY_DN16161_c0_g8_i1	GO:0005516(calmodulin binding);GO:0005634(nucleus);GO:0005886(plasma membrane);GO:0008150(biological_process)	1.40033	up	yes
TRINITY_DN14538_c0_g4	TRINITY_DN14538_c0_g4_i1	GO:0003676(nucleic acid binding);GO:0003700(DNA binding transcription factor activity);GO:0005634(nucleus);GO:0006355(regulation of transcription, DNA-templated)	1.39732	up	yes
TRINITY_DN15208_c0_g6	TRINITY_DN15208_c0_g6_i1	GO:0005886(plasma membrane);GO:0016020(membrane);GO:0031225(anchored component of membrane);GO:0046658(anchored component of plasma membrane)	1.39703	up	yes
TRINITY_DN11752_c0_g4	TRINITY_DN11752_c0_g4_i1;TRINITY_DN11752_c0_g4_i2	GO:0004674(protein serine/threonine kinase activity);GO:0005524(ATP binding);GO:0005886(plasma membrane);GO:0016021(integral component of membrane);GO:0016301(kinase activity);GO:0046777(protein autophosphorylation)	1.39663	up	yes
TRINITY_DN13644_c0_g4	TRINITY_DN13644_c0_g4_i1	GO:0005524(ATP binding);GO:0005978(glycogen biosynthetic process);GO:0008878(glucose-1-phosphate adenylyltransferase activity);GO:0009507(chloroplast);GO:0009570(chloroplast stroma);GO:0019252(starch biosynthetic process);GO:0030931(heterotetrameric ADPG pyrophosphorylase complex);GO:0048046(apoplast);GO:0048573(photoperiodism, flowering)	1.39311	up	yes
TRINITY_DN12996_c0_g3	TRINITY_DN12996_c0_g3_i1;TRINITY_DN12996_c0_g3_i2	GO:0006281(DNA repair);GO:0006284(base-excision repair);GO:0008725(DNA-3-methyladenine glycosylase activity)	1.39164	up	yes
TRINITY_DN13991_c0_g1	TRINITY_DN13991_c0_g1_i1	GO:0005576(extracellular region);GO:0016829(lyase activity);GO:0030570(pectate lyase activity);GO:0045490(pectin catabolic process);GO:0046872(metal ion binding)	1.38853	up	yes
TRINITY_DN10143_c0_g1	TRINITY_DN10143_c0_g1_i1;TRINITY_DN10143_c0_g1_i2	GO:0003674(molecular_function);GO:0008150(biological_process);GO:0016021(integral component of membrane)	1.38596	up	yes
TRINITY_DN14936_c0_g3	TRINITY_DN14936_c0_g3_i1;TRINITY_DN14936_c0_g3_i2	GO:0005886(plasma membrane);GO:0016301(kinase activity);GO:0016310(phosphorylation)	1.3851	up	yes
TRINITY_DN11198_c1_g1	TRINITY_DN11198_c1_g1_i1;TRINITY_DN11198_c1_g1_i2	GO:0005576(extracellular region);GO:0016042(lipid catabolic process);GO:0016788(hydrolase activity, acting on ester bonds);GO:0052689(carboxylic ester hydrolase activity)	1.38436	up	yes
TRINITY_DN10725_c0_g3	TRINITY_DN10725_c0_g3_i1;TRINITY_DN10725_c0_g3_i2	-	1.38285	up	yes
TRINITY_DN9055_c0_g1	TRINITY_DN9055_c0_g1_i1	GO:0003677(DNA binding);GO:0005634(nucleus);GO:0005886(plasma membrane);GO:0008150(biological_process)	1.38184	up	yes
TRINITY_DN11251_c0_g1	TRINITY_DN11251_c0_g1_i1;TRINITY_DN11251_c0_g1_i2;TRINITY_DN11251_c0_g1_i3;TRINITY_DN11251_c0_g1_i4;TRINITY_DN11251_c0_g1_i5	-	1.3797	up	yes
TRINITY_DN11861_c0_g4	TRINITY_DN11861_c0_g4_i1	GO:0003676(nucleic acid binding);GO:0003700(DNA binding transcription factor activity);GO:0005634(nucleus);GO:0006355(regulation of transcription, DNA-templated);GO:0008270(zinc ion binding)	1.3797	up	yes
TRINITY_DN12891_c1_g1	TRINITY_DN12891_c1_g1_i1;TRINITY_DN12891_c1_g1_i2;TRINITY_DN12891_c1_g1_i3	GO:0000272(polysaccharide catabolic process);GO:0005576(extracellular region);GO:0009507(chloroplast);GO:0016161(beta-amylase activity);GO:0102229(amylopectin maltohydrolase activity)	1.3771	up	yes
TRINITY_DN14543_c0_g2	TRINITY_DN14543_c0_g2_i1;TRINITY_DN14543_c0_g2_i2;TRINITY_DN14543_c0_g2_i3;TRINITY_DN14543_c0_g2_i4	GO:0000139(Golgi membrane);GO:0005794(Golgi apparatus);GO:0009506(plasmodesma);GO:0016021(integral component of membrane);GO:0016757(transferase activity, transferring glycosyl groups);GO:0016759(cellulose synthase activity);GO:0071555(cell wall organization)	1.37619	up	yes
TRINITY_DN13984_c0_g4	TRINITY_DN13984_c0_g4_i1	GO:0009055(electron transfer activity);GO:0015035(protein disulfide oxidoreductase activity);GO:0045454(cell redox homeostasis)	1.37493	up	yes
TRINITY_DN14612_c0_g1	TRINITY_DN14612_c0_g1_i1;TRINITY_DN14612_c0_g1_i2;TRINITY_DN14612_c0_g1_i3	GO:0005576(extracellular region);GO:0016829(lyase activity);GO:0030570(pectate lyase activity);GO:0045490(pectin catabolic process);GO:0046872(metal ion binding)	1.37218	up	yes
TRINITY_DN16084_c0_g2	TRINITY_DN16084_c0_g2_i1;TRINITY_DN16084_c0_g2_i2;TRINITY_DN16084_c0_g2_i3;TRINITY_DN16084_c0_g2_i4;TRINITY_DN16084_c0_g2_i5	GO:0003674(molecular_function);GO:0005634(nucleus);GO:0009506(plasmodesma);GO:0051513(regulation of monopolar cell growth)	1.37172	up	yes
TRINITY_DN14004_c0_g1	TRINITY_DN14004_c0_g1_i1	GO:0010143(cutin biosynthetic process);GO:0016020(membrane);GO:0016311(dephosphorylation);GO:0016791(phosphatase activity);GO:0090447(glycerol-3-phosphate 2-O-acyltransferase activity)	1.37148	up	yes
TRINITY_DN16406_c1_g1	TRINITY_DN16406_c1_g1_i1;TRINITY_DN16406_c1_g1_i2;TRINITY_DN16406_c1_g1_i3;TRINITY_DN16406_c1_g1_i4;TRINITY_DN16406_c1_g1_i5;TRINITY_DN16406_c1_g1_i6;TRINITY_DN16406_c1_g1_i7	GO:0005504(fatty acid binding);GO:0005783(endoplasmic reticulum);GO:0006631(fatty acid metabolic process);GO:0009507(chloroplast);GO:0009570(chloroplast stroma);GO:0009813(flavonoid biosynthetic process);GO:0045430(chalcone isomerase activity);GO:0080167(response to karrikin)	1.37027	up	yes
TRINITY_DN15294_c1_g2	TRINITY_DN15294_c1_g2_i1;TRINITY_DN15294_c1_g2_i2	GO:0003777(microtubule motor activity);GO:0005871(kinesin complex);GO:0007018(microtubule-based movement);GO:0016887(ATPase activity)	1.37014	up	yes
TRINITY_DN14997_c0_g11	TRINITY_DN14997_c0_g11_i1	GO:0004252(serine-type endopeptidase activity);GO:0005618(cell wall)	1.36983	up	yes
TRINITY_DN12220_c0_g3	TRINITY_DN12220_c0_g3_i1;TRINITY_DN12220_c0_g3_i2	GO:0003729(mRNA binding);GO:0004478(methionine adenosyltransferase activity);GO:0005524(ATP binding);GO:0005618(cell wall);GO:0005730(nucleolus);GO:0005737(cytoplasm);GO:0005829(cytosol);GO:0005886(plasma membrane);GO:0006555(methionine metabolic process);GO:0006556(S-adenosylmethionine biosynthetic process);GO:0006730(one-carbon metabolic process);GO:0009409(response to cold);GO:0009506(plasmode…	1.36878	up	yes
TRINITY_DN12243_c0_g1	TRINITY_DN12243_c0_g1_i1;TRINITY_DN12243_c0_g1_i2;TRINITY_DN12243_c0_g1_i3	GO:0005634(nucleus);GO:0006457(protein folding)	1.36669	up	yes
TRINITY_DN15829_c0_g1	TRINITY_DN15829_c0_g1_i1	GO:0005516(calmodulin binding);GO:0005575(cellular_component);GO:0009733(response to auxin)	1.36529	up	yes
TRINITY_DN15713_c1_g5	TRINITY_DN15713_c1_g5_i1	GO:0003674(molecular_function);GO:0008150(biological_process);GO:0016021(integral component of membrane);GO:0031225(anchored component of membrane)	1.36484	up	yes
TRINITY_DN11061_c1_g2	TRINITY_DN11061_c1_g2_i1;TRINITY_DN11061_c1_g2_i2;TRINITY_DN11061_c1_g2_i3	GO:0005524(ATP binding);GO:0005886(plasma membrane);GO:0016021(integral component of membrane);GO:0016301(kinase activity);GO:0016310(phosphorylation)	1.36484	up	yes
TRINITY_DN14324_c0_g4	TRINITY_DN14324_c0_g4_i1;TRINITY_DN14324_c0_g4_i2;TRINITY_DN14324_c0_g4_i3	GO:0009705(plant-type vacuole membrane);GO:0046786(viral replication complex formation and maintenance)	1.35952	up	yes
TRINITY_DN16520_c0_g17	TRINITY_DN16520_c0_g17_i1	-	1.35479	up	yes
TRINITY_DN1273_c0_g1	TRINITY_DN1273_c0_g1_i1	GO:0003674(molecular_function);GO:0005829(cytosol);GO:0005886(plasma membrane);GO:0006970(response to osmotic stress);GO:0009737(response to abscisic acid);GO:0009738(abscisic acid-activated signaling pathway);GO:0010116(positive regulation of abscisic acid biosynthetic process);GO:0016021(integral component of membrane);GO:1902074(response to salt)	1.35235	up	yes
TRINITY_DN14144_c0_g2	TRINITY_DN14144_c0_g2_i1;TRINITY_DN14144_c0_g2_i2	GO:0005886(plasma membrane);GO:0009416(response to light stimulus);GO:0016567(protein ubiquitination)	1.35153	up	yes
TRINITY_DN13046_c0_g3	TRINITY_DN13046_c0_g3_i1	GO:0000166(nucleotide binding);GO:0005886(plasma membrane);GO:0006281(DNA repair);GO:0007165(signal transduction);GO:0009411(response to UV);GO:0009507(chloroplast);GO:0009650(UV protection);GO:0042493(response to drug)	1.35132	up	yes
TRINITY_DN15844_c0_g4	TRINITY_DN15844_c0_g4_i1	GO:0016021(integral component of membrane);GO:0042626(ATPase activity, coupled to transmembrane movement of substances);GO:0055085(transmembrane transport)	1.34749	up	yes
TRINITY_DN15035_c0_g7	TRINITY_DN15035_c0_g7_i1	GO:0005794(Golgi apparatus);GO:0008417(fucosyltransferase activity);GO:0009832(plant-type cell wall biogenesis);GO:0009969(xyloglucan biosynthetic process)	1.347	up	yes
TRINITY_DN10444_c0_g2	TRINITY_DN10444_c0_g2_i1	GO:0005802(trans-Golgi network);GO:0032438(melanosome organization);GO:0042470(melanosome);GO:0072657(protein localization to membrane)	1.34437	up	yes
TRINITY_DN9013_c0_g1	TRINITY_DN9013_c0_g1_i1	GO:0046658(anchored component of plasma membrane)	1.34351	up	yes
TRINITY_DN12994_c0_g1	TRINITY_DN12994_c0_g1_i1;TRINITY_DN12994_c0_g1_i2	GO:0005509(calcium ion binding);GO:0005544(calcium-dependent phospholipid binding);GO:0005886(plasma membrane)	1.34189	up	yes
TRINITY_DN10908_c0_g1	TRINITY_DN10908_c0_g1_i1;TRINITY_DN10908_c0_g1_i2	GO:0001666(response to hypoxia);GO:0003674(molecular_function);GO:0005576(extracellular region);GO:0005615(extracellular space);GO:0005794(Golgi apparatus);GO:0009505(plant-type cell wall);GO:0040007(growth);GO:0048046(apoplast)	1.33879	up	yes
TRINITY_DN12480_c0_g2	TRINITY_DN12480_c0_g2_i1;TRINITY_DN12480_c0_g2_i2;TRINITY_DN12480_c0_g2_i3;TRINITY_DN12480_c0_g2_i4	GO:0003674(molecular_function);GO:0005634(nucleus);GO:0008150(biological_process)	1.33372	up	yes
TRINITY_DN9894_c0_g1	TRINITY_DN9894_c0_g1_i1	GO:0003674(molecular_function);GO:0008150(biological_process)	1.33101	up	yes
TRINITY_DN11885_c0_g8	TRINITY_DN11885_c0_g8_i1	GO:0004478(methionine adenosyltransferase activity);GO:0005829(cytosol)	1.33098	up	yes
TRINITY_DN14167_c0_g1	TRINITY_DN14167_c0_g1_i1;TRINITY_DN14167_c0_g1_i2;TRINITY_DN14167_c0_g1_i3;TRINITY_DN14167_c0_g1_i4	GO:0003689(DNA clamp loader activity);GO:0005663(DNA replication factor C complex);GO:0006261(DNA-dependent DNA replication)	1.33094	up	yes
TRINITY_DN14641_c0_g5	TRINITY_DN14641_c0_g5_i1	GO:0003700(DNA binding transcription factor activity);GO:0005634(nucleus);GO:0043565(sequence-specific DNA binding);GO:0044212(transcription regulatory region DNA binding)	1.32678	up	yes
TRINITY_DN11191_c0_g3	TRINITY_DN11191_c0_g3_i1	-	1.32571	up	yes
TRINITY_DN16485_c1_g10	TRINITY_DN16485_c1_g10_i1	GO:0004672(protein kinase activity);GO:0004675(transmembrane receptor protein serine/threonine kinase activity);GO:0005524(ATP binding);GO:0005886(plasma membrane);GO:0006468(protein phosphorylation);GO:0007166(cell surface receptor signaling pathway);GO:0009738(abscisic acid-activated signaling pathway);GO:0009845(seed germination);GO:0016021(integral component of membrane);GO:0019722(calcium-me…	1.32571	up	yes
TRINITY_DN9735_c0_g1	TRINITY_DN9735_c0_g1_i1	-	1.32115	up	yes
TRINITY_DN12595_c0_g4	TRINITY_DN12595_c0_g4_i1;TRINITY_DN12595_c0_g4_i2;TRINITY_DN12595_c0_g4_i3;TRINITY_DN12595_c0_g4_i4;TRINITY_DN12595_c0_g4_i5	GO:0008422(beta-glucosidase activity);GO:0009651(response to salt stress);GO:0009725(response to hormone);GO:0019762(glucosinolate catabolic process)	1.32057	up	yes
TRINITY_DN15836_c0_g2	TRINITY_DN15836_c0_g2_i1	GO:0005886(plasma membrane);GO:0006952(defense response)	1.31954	up	yes
TRINITY_DN10695_c0_g7	TRINITY_DN10695_c0_g7_i1	GO:0016301(kinase activity);GO:0016310(phosphorylation)	1.31934	up	yes
TRINITY_DN15255_c0_g7	TRINITY_DN15255_c0_g7_i1;TRINITY_DN15255_c0_g7_i2	GO:0004497(monooxygenase activity);GO:0007275(multicellular organism development);GO:0010268(brassinosteroid homeostasis);GO:0016125(sterol metabolic process);GO:0016132(brassinosteroid biosynthetic process)	1.31906	up	yes
TRINITY_DN7765_c0_g1	TRINITY_DN7765_c0_g1_i1	GO:0003700(DNA binding transcription factor activity);GO:0005634(nucleus);GO:0010200(response to chitin);GO:0043565(sequence-specific DNA binding);GO:0044212(transcription regulatory region DNA binding)	1.31703	up	yes
TRINITY_DN12537_c0_g3	TRINITY_DN12537_c0_g3_i1;TRINITY_DN12537_c0_g3_i10;TRINITY_DN12537_c0_g3_i2;TRINITY_DN12537_c0_g3_i3;TRINITY_DN12537_c0_g3_i4;TRINITY_DN12537_c0_g3_i5;TRINITY_DN12537_c0_g3_i6;TRINITY_DN12537_c0_g3_i7;TRINITY_DN12537_c0_g3_i8;TRINITY_DN12537_c0_g3_i9	GO:0051213(dioxygenase activity)	1.31502	up	yes
TRINITY_DN12120_c0_g1	TRINITY_DN12120_c0_g1_i1;TRINITY_DN12120_c0_g1_i10;TRINITY_DN12120_c0_g1_i11;TRINITY_DN12120_c0_g1_i12;TRINITY_DN12120_c0_g1_i13;TRINITY_DN12120_c0_g1_i14;TRINITY_DN12120_c0_g1_i15;TRINITY_DN12120_c0_g1_i2;TRINITY_DN12120_c0_g1_i3;TRINITY_DN12120_c0_g1_i4;TRINITY_DN12120_c0_g1_i5;TRINITY_DN12120_c0_g1_i6;TRINITY_DN12120_c0_g1_i7;TRINITY_DN12120_c0_g1_i8;TRINITY_DN12120_c0_g1_i9	GO:0016491(oxidoreductase activity);GO:0055114(oxidation-reduction process)	1.31381	up	yes
TRINITY_DN11464_c0_g1	TRINITY_DN11464_c0_g1_i1;TRINITY_DN11464_c0_g1_i2;TRINITY_DN11464_c0_g1_i3;TRINITY_DN11464_c0_g1_i4	GO:0003677(DNA binding);GO:0005096(GTPase activator activity);GO:0005634(nucleus);GO:0005829(cytosol);GO:0046872(metal ion binding)	1.31012	up	yes
TRINITY_DN11066_c0_g2	TRINITY_DN11066_c0_g2_i1;TRINITY_DN11066_c0_g2_i2	GO:0005515(protein binding)	1.30971	up	yes
TRINITY_DN17035_c0_g1	TRINITY_DN17035_c0_g1_i1	-	1.30885	up	yes
TRINITY_DN13859_c0_g4	TRINITY_DN13859_c0_g4_i1	GO:0003674(molecular_function);GO:0005634(nucleus);GO:0008150(biological_process)	1.30875	up	yes
TRINITY_DN11736_c1_g5	TRINITY_DN11736_c1_g5_i1	GO:0003674(molecular_function);GO:0005768(endosome);GO:0005794(Golgi apparatus);GO:0005802(trans-Golgi network);GO:0008150(biological_process)	1.30834	up	yes
TRINITY_DN13014_c0_g3	TRINITY_DN13014_c0_g3_i1	GO:0004553(hydrolase activity, hydrolyzing O-glycosyl compounds);GO:0005576(extracellular region);GO:0005618(cell wall);GO:0005794(Golgi apparatus);GO:0010411(xyloglucan metabolic process);GO:0016762(xyloglucan:xyloglucosyl transferase activity);GO:0016798(hydrolase activity, acting on glycosyl bonds);GO:0042546(cell wall biogenesis);GO:0048046(apoplast);GO:0071555(cell wall organization)	1.30419	up	yes
TRINITY_DN12741_c0_g6	TRINITY_DN12741_c0_g6_i1;TRINITY_DN12741_c0_g6_i2	GO:0005534(galactose binding);GO:0005575(cellular_component);GO:0017148(negative regulation of translation);GO:0030598(rRNA N-glycosylase activity);GO:0045807(positive regulation of endocytosis)	1.30356	up	yes
TRINITY_DN12555_c0_g2	TRINITY_DN12555_c0_g2_i1;TRINITY_DN12555_c0_g2_i2	GO:0005634(nucleus);GO:0008270(zinc ion binding);GO:0009737(response to abscisic acid);GO:0010200(response to chitin)	1.30256	up	yes
TRINITY_DN14758_c0_g3	TRINITY_DN14758_c0_g3_i1	GO:0005089(Rho guanyl-nucleotide exchange factor activity);GO:0005515(protein binding);GO:0005634(nucleus);GO:0005829(cytosol);GO:0009860(pollen tube growth);GO:0016324(apical plasma membrane);GO:0080092(regulation of pollen tube growth)	1.3013	up	yes
TRINITY_DN15348_c0_g2	TRINITY_DN15348_c0_g2_i1;TRINITY_DN15348_c0_g2_i2	GO:0005576(extracellular region);GO:0006949(syncytium formation);GO:0009505(plant-type cell wall);GO:0009664(plant-type cell wall organization);GO:0009826(unidimensional cell growth);GO:0009828(plant-type cell wall loosening);GO:0009831(plant-type cell wall modification involved in multidimensional cell growth);GO:0016020(membrane)	1.29927	up	yes
TRINITY_DN16192_c1_g5	TRINITY_DN16192_c1_g5_i1	GO:0004672(protein kinase activity);GO:0004674(protein serine/threonine kinase activity);GO:0005524(ATP binding);GO:0005886(plasma membrane);GO:0006468(protein phosphorylation);GO:0007169(transmembrane receptor protein tyrosine kinase signaling pathway);GO:0016021(integral component of membrane);GO:0016301(kinase activity)	1.2931	up	yes
TRINITY_DN10702_c0_g7	TRINITY_DN10702_c0_g7_i1	GO:0004672(protein kinase activity);GO:0004674(protein serine/threonine kinase activity);GO:0005515(protein binding);GO:0005524(ATP binding);GO:0005886(plasma membrane);GO:0006468(protein phosphorylation);GO:0007169(transmembrane receptor protein tyrosine kinase signaling pathway);GO:0009506(plasmodesma);GO:0016021(integral component of membrane);GO:0016301(kinase activity);GO:0046777(protein aut…	1.29109	up	yes
TRINITY_DN12854_c1_g3	TRINITY_DN12854_c1_g3_i1;TRINITY_DN12854_c1_g3_i2;TRINITY_DN12854_c1_g3_i3	GO:0005829(cytosol);GO:0008171(O-methyltransferase activity);GO:0008757(S-adenosylmethionine-dependent methyltransferase activity);GO:0019438(aromatic compound biosynthetic process)	1.29045	up	yes
TRINITY_DN10883_c0_g3	TRINITY_DN10883_c0_g3_i1	GO:0005576(extracellular region);GO:0009505(plant-type cell wall);GO:0009506(plasmodesma);GO:0016042(lipid catabolic process);GO:0016788(hydrolase activity, acting on ester bonds);GO:0052689(carboxylic ester hydrolase activity)	1.28818	up	yes
TRINITY_DN9789_c0_g2	TRINITY_DN9789_c0_g2_i1;TRINITY_DN9789_c0_g2_i2	GO:0003677(DNA binding);GO:0003700(DNA binding transcription factor activity);GO:0005634(nucleus);GO:0006351(transcription, DNA-templated);GO:0006355(regulation of transcription, DNA-templated);GO:0008284(positive regulation of cell proliferation);GO:0009733(response to auxin);GO:0009793(embryo development ending in seed dormancy);GO:0010116(positive regulation of abscisic acid biosynthetic proce…	1.28643	up	yes
TRINITY_DN13674_c0_g7	TRINITY_DN13674_c0_g7_i1	GO:0005634(nucleus)	1.28508	up	yes
TRINITY_DN13486_c0_g7	TRINITY_DN13486_c0_g7_i1	GO:0003674(molecular_function);GO:0005634(nucleus);GO:0008150(biological_process);GO:0009506(plasmodesma)	1.28508	up	yes
TRINITY_DN14943_c0_g4	TRINITY_DN14943_c0_g4_i1	GO:0003779(actin binding);GO:0005522(profilin binding);GO:0005886(plasma membrane);GO:0005911(cell-cell junction);GO:0009932(cell tip growth);GO:0016021(integral component of membrane);GO:0045010(actin nucleation);GO:0051015(actin filament binding)	1.28391	up	yes
TRINITY_DN14142_c1_g8	TRINITY_DN14142_c1_g8_i1	GO:0005886(plasma membrane);GO:0009705(plant-type vacuole membrane);GO:0016021(integral component of membrane);GO:0022821(potassium ion antiporter activity);GO:0090333(regulation of stomatal closure)	1.28241	up	yes
TRINITY_DN13282_c0_g3	TRINITY_DN13282_c0_g3_i1;TRINITY_DN13282_c0_g3_i2;TRINITY_DN13282_c0_g3_i3	GO:0009658(chloroplast organization);GO:0009707(chloroplast outer membrane)	1.28039	up	yes
TRINITY_DN9849_c0_g1	TRINITY_DN9849_c0_g1_i1	GO:0005515(protein binding);GO:0005634(nucleus);GO:0005737(cytoplasm);GO:0009055(electron transfer activity);GO:0009751(response to salicylic acid);GO:0009863(salicylic acid mediated signaling pathway);GO:0009867(jasmonic acid mediated signaling pathway);GO:0015035(protein disulfide oxidoreductase activity);GO:0045454(cell redox homeostasis)	1.27984	up	yes
TRINITY_DN10094_c0_g1	TRINITY_DN10094_c0_g1_i1;TRINITY_DN10094_c0_g1_i2;TRINITY_DN10094_c0_g1_i3	GO:0003735(structural constituent of ribosome);GO:0006412(translation)	1.27862	up	yes
TRINITY_DN13058_c0_g2	TRINITY_DN13058_c0_g2_i1	GO:0004721(phosphoprotein phosphatase activity);GO:0005654(nucleoplasm);GO:0005730(nucleolus);GO:0005737(cytoplasm);GO:0005977(glycogen metabolic process);GO:0006470(protein dephosphorylation);GO:0007049(cell cycle);GO:0016791(phosphatase activity);GO:0032922(circadian regulation of gene expression);GO:0042752(regulation of circadian rhythm);GO:0043153(entrainment of circadian clock by photoperio…	1.27718	up	yes
TRINITY_DN15862_c0_g1	TRINITY_DN15862_c0_g1_i1;TRINITY_DN15862_c0_g1_i2	GO:0003674(molecular_function);GO:0005576(extracellular region);GO:0008150(biological_process);GO:0016021(integral component of membrane)	1.27666	up	yes
TRINITY_DN16013_c1_g8	TRINITY_DN16013_c1_g8_i1	-	1.27459	up	yes
TRINITY_DN12745_c0_g5	TRINITY_DN12745_c0_g5_i1	GO:0003841(1-acylglycerol-3-phosphate O-acyltransferase activity);GO:0005739(mitochondrion);GO:0008152(metabolic process);GO:0016021(integral component of membrane);GO:0016024(CDP-diacylglycerol biosynthetic process);GO:0016746(transferase activity, transferring acyl groups)	1.27119	up	yes
TRINITY_DN11160_c0_g1	TRINITY_DN11160_c0_g1_i1;TRINITY_DN11160_c0_g1_i10;TRINITY_DN11160_c0_g1_i11;TRINITY_DN11160_c0_g1_i2;TRINITY_DN11160_c0_g1_i3;TRINITY_DN11160_c0_g1_i4;TRINITY_DN11160_c0_g1_i5;TRINITY_DN11160_c0_g1_i6;TRINITY_DN11160_c0_g1_i7;TRINITY_DN11160_c0_g1_i8;TRINITY_DN11160_c0_g1_i9	GO:0009505(plant-type cell wall)	1.27017	up	yes
TRINITY_DN11724_c0_g3	TRINITY_DN11724_c0_g3_i1;TRINITY_DN11724_c0_g3_i2;TRINITY_DN11724_c0_g3_i3;TRINITY_DN11724_c0_g3_i4;TRINITY_DN11724_c0_g3_i5	GO:0003674(molecular_function);GO:0005634(nucleus);GO:0008150(biological_process);GO:0009505(plant-type cell wall)	1.26997	up	yes
TRINITY_DN9834_c0_g1	TRINITY_DN9834_c0_g1_i1;TRINITY_DN9834_c0_g1_i2;TRINITY_DN9834_c0_g1_i3;TRINITY_DN9834_c0_g1_i4;TRINITY_DN9834_c0_g1_i5;TRINITY_DN9834_c0_g1_i6	GO:0004970(ionotropic glutamate receptor activity);GO:0005217(intracellular ligand-gated ion channel activity);GO:0006811(ion transport);GO:0006874(cellular calcium ion homeostasis);GO:0009416(response to light stimulus);GO:0016021(integral component of membrane)	1.26748	up	yes
TRINITY_DN13029_c0_g2	TRINITY_DN13029_c0_g2_i1	GO:0046658(anchored component of plasma membrane)	1.26716	up	yes
TRINITY_DN12537_c0_g1	TRINITY_DN12537_c0_g1_i1;TRINITY_DN12537_c0_g1_i2;TRINITY_DN12537_c0_g1_i3;TRINITY_DN12537_c0_g1_i4	GO:0051213(dioxygenase activity)	1.26679	up	yes
TRINITY_DN9715_c0_g1	TRINITY_DN9715_c0_g1_i1	GO:0003677(DNA binding);GO:0003700(DNA binding transcription factor activity);GO:0005634(nucleus);GO:0006351(transcription, DNA-templated);GO:0006355(regulation of transcription, DNA-templated);GO:0009506(plasmodesma);GO:0009734(auxin-activated signaling pathway)	1.26574	up	yes
TRINITY_DN11039_c0_g4	TRINITY_DN11039_c0_g4_i1	GO:0005886(plasma membrane);GO:0009507(chloroplast)	1.26571	up	yes
TRINITY_DN11895_c0_g4	TRINITY_DN11895_c0_g4_i1	GO:0005507(copper ion binding);GO:0009505(plant-type cell wall);GO:0009506(plasmodesma);GO:0016722(oxidoreductase activity, oxidizing metal ions);GO:0046658(anchored component of plasma membrane)	1.26411	up	yes
TRINITY_DN14136_c0_g1	TRINITY_DN14136_c0_g1_i1;TRINITY_DN14136_c0_g1_i2;TRINITY_DN14136_c0_g1_i3;TRINITY_DN14136_c0_g1_i4	GO:0016021(integral component of membrane);GO:0042626(ATPase activity, coupled to transmembrane movement of substances);GO:0055085(transmembrane transport)	1.25848	up	yes
TRINITY_DN16021_c0_g4	TRINITY_DN16021_c0_g4_i1	-	1.25749	up	yes
TRINITY_DN13634_c0_g2	TRINITY_DN13634_c0_g2_i1;TRINITY_DN13634_c0_g2_i2;TRINITY_DN13634_c0_g2_i3;TRINITY_DN13634_c0_g2_i4;TRINITY_DN13634_c0_g2_i5	GO:0005634(nucleus);GO:0006281(DNA repair);GO:0006284(base-excision repair);GO:0008725(DNA-3-methyladenine glycosylase activity)	1.25589	up	yes
TRINITY_DN10718_c0_g5	TRINITY_DN10718_c0_g5_i1;TRINITY_DN10718_c0_g5_i2;TRINITY_DN10718_c0_g5_i3	-	1.24955	up	yes
TRINITY_DN14428_c0_g1	TRINITY_DN14428_c0_g1_i1	GO:0004674(protein serine/threonine kinase activity);GO:0005524(ATP binding);GO:0005886(plasma membrane);GO:0006468(protein phosphorylation);GO:0016021(integral component of membrane);GO:0016301(kinase activity);GO:0016310(phosphorylation)	1.24699	up	yes
TRINITY_DN14494_c0_g1	TRINITY_DN14494_c0_g1_i1;TRINITY_DN14494_c0_g1_i10;TRINITY_DN14494_c0_g1_i11;TRINITY_DN14494_c0_g1_i12;TRINITY_DN14494_c0_g1_i2;TRINITY_DN14494_c0_g1_i3;TRINITY_DN14494_c0_g1_i4;TRINITY_DN14494_c0_g1_i5;TRINITY_DN14494_c0_g1_i6;TRINITY_DN14494_c0_g1_i7;TRINITY_DN14494_c0_g1_i8;TRINITY_DN14494_c0_g1_i9	GO:0003700(DNA binding transcription factor activity);GO:0005515(protein binding);GO:0005634(nucleus);GO:0006351(transcription, DNA-templated);GO:0006355(regulation of transcription, DNA-templated);GO:0009751(response to salicylic acid);GO:0009753(response to jasmonic acid);GO:0009862(systemic acquired resistance, salicylic acid mediated signaling pathway);GO:0009864(induced systemic resistance, …	1.24225	up	yes
TRINITY_DN16191_c0_g2	TRINITY_DN16191_c0_g2_i1;TRINITY_DN16191_c0_g2_i2;TRINITY_DN16191_c0_g2_i3	GO:0003777(microtubule motor activity);GO:0005871(kinesin complex);GO:0007018(microtubule-based movement);GO:0016887(ATPase activity)	1.24125	up	yes
TRINITY_DN10718_c0_g1	TRINITY_DN10718_c0_g1_i1;TRINITY_DN10718_c0_g1_i2;TRINITY_DN10718_c0_g1_i3;TRINITY_DN10718_c0_g1_i4	-	1.24027	up	yes
TRINITY_DN10826_c0_g8	TRINITY_DN10826_c0_g8_i1	GO:0009536(plastid)	1.239	up	yes
TRINITY_DN14554_c1_g1	TRINITY_DN14554_c1_g1_i1;TRINITY_DN14554_c1_g1_i2;TRINITY_DN14554_c1_g1_i3;TRINITY_DN14554_c1_g1_i4;TRINITY_DN14554_c1_g1_i5	GO:0005575(cellular_component);GO:0008150(biological_process);GO:0016829(lyase activity)	1.23835	up	yes
TRINITY_DN15433_c1_g2	TRINITY_DN15433_c1_g2_i1;TRINITY_DN15433_c1_g2_i2	-	1.23641	up	yes
TRINITY_DN13280_c0_g1	TRINITY_DN13280_c0_g1_i1	GO:0042803(protein homodimerization activity)	1.23479	up	yes
TRINITY_DN13440_c0_g5	TRINITY_DN13440_c0_g5_i1;TRINITY_DN13440_c0_g5_i2	GO:0005576(extracellular region);GO:0009506(plasmodesma);GO:0016021(integral component of membrane);GO:0016032(viral process)	1.22883	up	yes
TRINITY_DN14316_c0_g3	TRINITY_DN14316_c0_g3_i1	-	1.22785	up	yes
TRINITY_DN12168_c0_g3	TRINITY_DN12168_c0_g3_i1;TRINITY_DN12168_c0_g3_i2	GO:0004674(protein serine/threonine kinase activity);GO:0005524(ATP binding);GO:0005886(plasma membrane);GO:0006468(protein phosphorylation);GO:0007169(transmembrane receptor protein tyrosine kinase signaling pathway);GO:0010082(regulation of root meristem growth);GO:0016301(kinase activity)	1.22544	up	yes
TRINITY_DN15267_c0_g2	TRINITY_DN15267_c0_g2_i1;TRINITY_DN15267_c0_g2_i2	GO:0005249(voltage-gated potassium channel activity);GO:0005887(integral component of plasma membrane);GO:0042391(regulation of membrane potential)	1.22432	up	yes
TRINITY_DN13771_c0_g1	TRINITY_DN13771_c0_g1_i1;TRINITY_DN13771_c0_g1_i2	GO:0000036(acyl carrier activity);GO:0006633(fatty acid biosynthetic process);GO:0009507(chloroplast);GO:0009536(plastid);GO:0016297(acyl-[acyl-carrier-protein] hydrolase activity)	1.22184	up	yes
TRINITY_DN17034_c0_g1	TRINITY_DN17034_c0_g1_i1	-	1.22053	up	yes
TRINITY_DN13834_c0_g9	TRINITY_DN13834_c0_g9_i1	GO:0005739(mitochondrion);GO:0009507(chloroplast);GO:0009570(chloroplast stroma);GO:0009658(chloroplast organization);GO:0009941(chloroplast envelope);GO:0031425(chloroplast RNA processing)	1.21932	up	yes
TRINITY_DN12988_c0_g3	TRINITY_DN12988_c0_g3_i1;TRINITY_DN12988_c0_g3_i2;TRINITY_DN12988_c0_g3_i3;TRINITY_DN12988_c0_g3_i4	GO:0004650(polygalacturonase activity);GO:0005576(extracellular region);GO:0005975(carbohydrate metabolic process);GO:0016829(lyase activity);GO:0071555(cell wall organization)	1.21932	up	yes
TRINITY_DN15518_c1_g1	TRINITY_DN15518_c1_g1_i1	GO:0008373(sialyltransferase activity);GO:0008378(galactosyltransferase activity);GO:0009311(oligosaccharide metabolic process);GO:0018279(protein N-linked glycosylation via asparagine);GO:0097503(sialylation)	1.21901	up	yes
TRINITY_DN12077_c1_g4	TRINITY_DN12077_c1_g4_i1;TRINITY_DN12077_c1_g4_i10;TRINITY_DN12077_c1_g4_i11;TRINITY_DN12077_c1_g4_i12;TRINITY_DN12077_c1_g4_i13;TRINITY_DN12077_c1_g4_i2;TRINITY_DN12077_c1_g4_i3;TRINITY_DN12077_c1_g4_i4;TRINITY_DN12077_c1_g4_i5;TRINITY_DN12077_c1_g4_i6;TRINITY_DN12077_c1_g4_i7;TRINITY_DN12077_c1_g4_i8;TRINITY_DN12077_c1_g4_i9	GO:0005576(extracellular region);GO:0016491(oxidoreductase activity);GO:0055114(oxidation-reduction process)	1.21768	up	yes
TRINITY_DN13935_c0_g5	TRINITY_DN13935_c0_g5_i1	GO:0005634(nucleus);GO:0042752(regulation of circadian rhythm);GO:0043111(replication fork arrest)	1.21664	up	yes
TRINITY_DN4012_c0_g1	TRINITY_DN4012_c0_g1_i1	GO:0005739(mitochondrion);GO:0007165(signal transduction)	1.21439	up	yes
TRINITY_DN14937_c0_g7	TRINITY_DN14937_c0_g7_i1;TRINITY_DN14937_c0_g7_i2	GO:0003677(DNA binding);GO:0003700(DNA binding transcription factor activity);GO:0005634(nucleus);GO:0006355(regulation of transcription, DNA-templated)	1.21289	up	yes
TRINITY_DN15888_c0_g3	TRINITY_DN15888_c0_g3_i1	GO:0043161(proteasome-mediated ubiquitin-dependent protein catabolic process);GO:0061630(ubiquitin protein ligase activity)	1.21249	up	yes
TRINITY_DN11839_c0_g6	TRINITY_DN11839_c0_g6_i1	GO:0003674(molecular_function);GO:0005576(extracellular region);GO:0009506(plasmodesma);GO:0010497(plasmodesmata-mediated intercellular transport);GO:0016021(integral component of membrane);GO:0046739(transport of virus in multicellular host)	1.21216	up	yes
TRINITY_DN9500_c0_g1	TRINITY_DN9500_c0_g1_i1;TRINITY_DN9500_c0_g1_i2;TRINITY_DN9500_c0_g1_i3	GO:0003700(DNA binding transcription factor activity);GO:0005515(protein binding);GO:0005634(nucleus);GO:0006351(transcription, DNA-templated);GO:0006355(regulation of transcription, DNA-templated);GO:0009630(gravitropism);GO:0009638(phototropism);GO:0009733(response to auxin);GO:0009734(auxin-activated signaling pathway);GO:0080086(stamen filament development)	1.21119	up	yes
TRINITY_DN12773_c0_g2	TRINITY_DN12773_c0_g2_i1;TRINITY_DN12773_c0_g2_i2	-	1.21119	up	yes
TRINITY_DN14442_c0_g4	TRINITY_DN14442_c0_g4_i1;TRINITY_DN14442_c0_g4_i2	-	1.20561	up	yes
TRINITY_DN14585_c0_g7	TRINITY_DN14585_c0_g7_i1	-	1.20198	up	yes
TRINITY_DN10023_c0_g1	TRINITY_DN10023_c0_g1_i1	GO:0005886(plasma membrane);GO:0009506(plasmodesma)	1.20198	up	yes
TRINITY_DN11440_c0_g4	TRINITY_DN11440_c0_g4_i1	GO:0003333(amino acid transmembrane transport);GO:0005886(plasma membrane);GO:0015171(amino acid transmembrane transporter activity)	1.2	up	yes
TRINITY_DN13603_c0_g3	TRINITY_DN13603_c0_g3_i1	GO:0005634(nucleus);GO:0006351(transcription, DNA-templated);GO:0045892(negative regulation of transcription, DNA-templated)	1.1999	up	yes
TRINITY_DN14801_c0_g4	TRINITY_DN14801_c0_g4_i1;TRINITY_DN14801_c0_g4_i2	-	1.19309	up	yes
TRINITY_DN11146_c0_g1	TRINITY_DN11146_c0_g1_i1;TRINITY_DN11146_c0_g1_i2	-	1.19282	up	yes
TRINITY_DN16134_c0_g2	TRINITY_DN16134_c0_g2_i1	-	1.19211	up	yes
TRINITY_DN12984_c0_g3	TRINITY_DN12984_c0_g3_i1	-	1.19089	up	yes
TRINITY_DN13798_c0_g3	TRINITY_DN13798_c0_g3_i1	-	1.19052	up	yes
TRINITY_DN12192_c0_g11	TRINITY_DN12192_c0_g11_i1	GO:0000015(phosphopyruvate hydratase complex);GO:0000977(RNA polymerase II regulatory region sequence-specific DNA binding);GO:0001227(transcriptional repressor activity, RNA polymerase II transcription regulatory region sequence-specific DNA binding);GO:0001701(in utero embryonic development);GO:0003723(RNA binding);GO:0004634(phosphopyruvate hydratase activity);GO:0005737(cytoplasm);GO:0005829(…	1.18836	up	yes
TRINITY_DN11621_c0_g4	TRINITY_DN11621_c0_g4_i1;TRINITY_DN11621_c0_g4_i2;TRINITY_DN11621_c0_g4_i3	GO:0005886(plasma membrane);GO:0016021(integral component of membrane);GO:0042626(ATPase activity, coupled to transmembrane movement of substances)	1.18478	up	yes
TRINITY_DN11518_c1_g1	TRINITY_DN11518_c1_g1_i1;TRINITY_DN11518_c1_g1_i2;TRINITY_DN11518_c1_g1_i3	GO:0005773(vacuole);GO:0005887(integral component of plasma membrane);GO:0009506(plasmodesma);GO:0009992(cellular water homeostasis);GO:0015250(water channel activity);GO:0015254(glycerol channel activity);GO:0034220(ion transmembrane transport)	1.18396	up	yes
TRINITY_DN15537_c0_g3	TRINITY_DN15537_c0_g3_i1;TRINITY_DN15537_c0_g3_i2;TRINITY_DN15537_c0_g3_i3;TRINITY_DN15537_c0_g3_i4	GO:0005737(cytoplasm);GO:0010345(suberin biosynthetic process);GO:0016740(transferase activity);GO:0016747(transferase activity, transferring acyl groups other than amino-acyl groups);GO:0050734(hydroxycinnamoyltransferase activity);GO:0052325(cell wall pectin biosynthetic process);GO:0102406(omega-hydroxypalmitate O-sinapoyl transferase activity)	1.1817	up	yes
TRINITY_DN15202_c0_g5	TRINITY_DN15202_c0_g5_i1;TRINITY_DN15202_c0_g5_i2	GO:0005576(extracellular region);GO:0005773(vacuole)	1.17312	up	yes
TRINITY_DN13266_c0_g6	TRINITY_DN13266_c0_g6_i1	GO:0005575(cellular_component);GO:0008150(biological_process)	1.17252	up	yes
TRINITY_DN13402_c0_g1	TRINITY_DN13402_c0_g1_i1	-	1.17198	up	yes
TRINITY_DN15009_c0_g1	TRINITY_DN15009_c0_g1_i1;TRINITY_DN15009_c0_g1_i2;TRINITY_DN15009_c0_g1_i3;TRINITY_DN15009_c0_g1_i4;TRINITY_DN15009_c0_g1_i5;TRINITY_DN15009_c0_g1_i6;TRINITY_DN15009_c0_g1_i7;TRINITY_DN15009_c0_g1_i8	GO:0006629(lipid metabolic process);GO:0016020(membrane);GO:0016298(lipase activity)	1.17185	up	yes
TRINITY_DN9737_c0_g1	TRINITY_DN9737_c0_g1_i1	GO:0004142(diacylglycerol cholinephosphotransferase activity);GO:0016021(integral component of membrane);GO:0046470(phosphatidylcholine metabolic process)	1.17185	up	yes
TRINITY_DN13602_c0_g4	TRINITY_DN13602_c0_g4_i1;TRINITY_DN13602_c0_g4_i2	-	1.17171	up	yes
TRINITY_DN14123_c0_g1	TRINITY_DN14123_c0_g1_i1	GO:0004675(transmembrane receptor protein serine/threonine kinase activity);GO:0005515(protein binding);GO:0005524(ATP binding);GO:0005576(extracellular region);GO:0005886(plasma membrane);GO:0006468(protein phosphorylation);GO:0007165(signal transduction);GO:0016021(integral component of membrane)	1.16721	up	yes
TRINITY_DN10903_c0_g4	TRINITY_DN10903_c0_g4_i1	GO:0003674(molecular_function);GO:0005768(endosome);GO:0005794(Golgi apparatus);GO:0005802(trans-Golgi network);GO:0008150(biological_process);GO:0016021(integral component of membrane)	1.16693	up	yes
TRINITY_DN14274_c0_g6	TRINITY_DN14274_c0_g6_i1	GO:0005576(extracellular region);GO:0005634(nucleus);GO:0005737(cytoplasm);GO:0005774(vacuolar membrane)	1.16663	up	yes
TRINITY_DN11945_c0_g3	TRINITY_DN11945_c0_g3_i1;TRINITY_DN11945_c0_g3_i2;TRINITY_DN11945_c0_g3_i3;TRINITY_DN11945_c0_g3_i4	GO:0004553(hydrolase activity, hydrolyzing O-glycosyl compounds);GO:0005576(extracellular region);GO:0005618(cell wall);GO:0010411(xyloglucan metabolic process);GO:0016762(xyloglucan:xyloglucosyl transferase activity);GO:0016798(hydrolase activity, acting on glycosyl bonds);GO:0042546(cell wall biogenesis);GO:0048046(apoplast);GO:0071555(cell wall organization)	1.165	up	yes
TRINITY_DN14126_c0_g1	TRINITY_DN14126_c0_g1_i1;TRINITY_DN14126_c0_g1_i2	-	1.16396	up	yes
TRINITY_DN14678_c1_g5	TRINITY_DN14678_c1_g5_i1	GO:0003674(molecular_function);GO:0005739(mitochondrion);GO:0008150(biological_process)	1.16362	up	yes
TRINITY_DN10958_c0_g10	TRINITY_DN10958_c0_g10_i1	-	1.16163	up	yes
TRINITY_DN12755_c0_g2	TRINITY_DN12755_c0_g2_i1	GO:0003779(actin binding);GO:0005515(protein binding);GO:0005618(cell wall);GO:0005634(nucleus);GO:0005886(plasma membrane);GO:0016020(membrane);GO:0016021(integral component of membrane);GO:0030036(actin cytoskeleton organization);GO:0045010(actin nucleation);GO:0051015(actin filament binding);GO:0051016(barbed-end actin filament capping)	1.15961	up	yes
TRINITY_DN14911_c1_g4	TRINITY_DN14911_c1_g4_i1	GO:0003674(molecular_function);GO:0005576(extracellular region);GO:0005615(extracellular space);GO:0005618(cell wall);GO:0005794(Golgi apparatus);GO:0005829(cytosol);GO:0009505(plant-type cell wall);GO:0009741(response to brassinosteroid);GO:0048046(apoplast)	1.15961	up	yes
TRINITY_DN12559_c0_g1	TRINITY_DN12559_c0_g1_i1;TRINITY_DN12559_c0_g1_i2;TRINITY_DN12559_c0_g1_i3	-	1.15759	up	yes
TRINITY_DN11533_c0_g1	TRINITY_DN11533_c0_g1_i1;TRINITY_DN11533_c0_g1_i2;TRINITY_DN11533_c0_g1_i3;TRINITY_DN11533_c0_g1_i4	-	1.15677	up	yes
TRINITY_DN16368_c1_g4	TRINITY_DN16368_c1_g4_i1;TRINITY_DN16368_c1_g4_i2;TRINITY_DN16368_c1_g4_i3	GO:0003700(DNA binding transcription factor activity);GO:0005515(protein binding);GO:0005634(nucleus);GO:0006351(transcription, DNA-templated);GO:0006355(regulation of transcription, DNA-templated);GO:0009873(ethylene-activated signaling pathway);GO:0010200(response to chitin);GO:0016036(cellular response to phosphate starvation);GO:0043565(sequence-specific DNA binding);GO:0044212(transcription …	1.15643	up	yes
TRINITY_DN17083_c0_g1	TRINITY_DN17083_c0_g1_i1	GO:0005515(protein binding)	1.15601	up	yes
TRINITY_DN14372_c0_g6	TRINITY_DN14372_c0_g6_i1	GO:0003674(molecular_function);GO:0008150(biological_process);GO:0016021(integral component of membrane)	1.15433	up	yes
TRINITY_DN15310_c0_g4	TRINITY_DN15310_c0_g4_i1	GO:0005524(ATP binding);GO:0005634(nucleus);GO:0005737(cytoplasm);GO:0008152(metabolic process);GO:0009411(response to UV);GO:0009611(response to wounding);GO:0009620(response to fungus);GO:0009698(phenylpropanoid metabolic process);GO:0016207(4-coumarate-CoA ligase activity);GO:0016874(ligase activity)	1.15262	up	yes
TRINITY_DN13827_c0_g1	TRINITY_DN13827_c0_g1_i1;TRINITY_DN13827_c0_g1_i2;TRINITY_DN13827_c0_g1_i3;TRINITY_DN13827_c0_g1_i4;TRINITY_DN13827_c0_g1_i5;TRINITY_DN13827_c0_g1_i6;TRINITY_DN13827_c0_g1_i7;TRINITY_DN13827_c0_g1_i8	-	1.15256	up	yes
TRINITY_DN11896_c0_g3	TRINITY_DN11896_c0_g3_i1;TRINITY_DN11896_c0_g3_i2	GO:0005769(early endosome);GO:0005798(Golgi-associated vesicle);GO:0005886(plasma membrane);GO:0030100(regulation of endocytosis);GO:0043161(proteasome-mediated ubiquitin-dependent protein catabolic process);GO:0061630(ubiquitin protein ligase activity);GO:0071470(cellular response to osmotic stress);GO:1901000(regulation of response to salt stress)	1.15189	up	yes
TRINITY_DN10853_c0_g2	TRINITY_DN10853_c0_g2_i1	GO:0003985(acetyl-CoA C-acetyltransferase activity);GO:0005737(cytoplasm);GO:0005739(mitochondrion);GO:0005777(peroxisome);GO:0005829(cytosol);GO:0005886(plasma membrane);GO:0006635(fatty acid beta-oxidation);GO:0008299(isoprenoid biosynthetic process);GO:0009793(embryo development ending in seed dormancy);GO:0009846(pollen germination);GO:0009860(pollen tube growth);GO:0016125(sterol metabolic p…	1.15186	up	yes
TRINITY_DN15019_c0_g3	TRINITY_DN15019_c0_g3_i1	GO:0003677(DNA binding);GO:0003700(DNA binding transcription factor activity);GO:0005515(protein binding);GO:0005634(nucleus);GO:0006351(transcription, DNA-templated);GO:0006355(regulation of transcription, DNA-templated);GO:0046872(metal ion binding)	1.15166	up	yes
TRINITY_DN13533_c1_g7	TRINITY_DN13533_c1_g7_i1	-	1.14965	up	yes
TRINITY_DN13013_c0_g4	TRINITY_DN13013_c0_g4_i1;TRINITY_DN13013_c0_g4_i2	GO:0016298(lipase activity)	1.14902	up	yes
TRINITY_DN14738_c0_g1	TRINITY_DN14738_c0_g1_i1;TRINITY_DN14738_c0_g1_i2	GO:0005768(endosome);GO:0005774(vacuolar membrane);GO:0005802(trans-Golgi network);GO:0008757(S-adenosylmethionine-dependent methyltransferase activity);GO:0032259(methylation)	1.14842	up	yes
TRINITY_DN14279_c0_g3	TRINITY_DN14279_c0_g3_i1;TRINITY_DN14279_c0_g3_i2;TRINITY_DN14279_c0_g3_i3	-	1.14695	up	yes
TRINITY_DN10106_c0_g1	TRINITY_DN10106_c0_g1_i1;TRINITY_DN10106_c0_g1_i2	GO:0004478(methionine adenosyltransferase activity);GO:0005829(cytosol)	1.14667	up	yes
TRINITY_DN13525_c0_g2	TRINITY_DN13525_c0_g2_i1;TRINITY_DN13525_c0_g2_i2;TRINITY_DN13525_c0_g2_i3	GO:0005576(extracellular region);GO:0016042(lipid catabolic process);GO:0016788(hydrolase activity, acting on ester bonds);GO:0048046(apoplast);GO:0052689(carboxylic ester hydrolase activity)	1.14588	up	yes
TRINITY_DN14851_c0_g3	TRINITY_DN14851_c0_g3_i1	-	1.14551	up	yes
TRINITY_DN12481_c0_g3	TRINITY_DN12481_c0_g3_i1	GO:0003677(DNA binding);GO:0003700(DNA binding transcription factor activity);GO:0005515(protein binding);GO:0005634(nucleus);GO:0006351(transcription, DNA-templated);GO:0006355(regulation of transcription, DNA-templated);GO:0007165(signal transduction);GO:0009585(red, far-red light phototransduction);GO:0009639(response to red or far red light);GO:0009704(de-etiolation);GO:0009740(gibberellic ac…	1.14337	up	yes
TRINITY_DN14069_c1_g8	TRINITY_DN14069_c1_g8_i1	GO:0005524(ATP binding);GO:0005634(nucleus);GO:0006952(defense response);GO:0043130(ubiquitin binding);GO:0043531(ADP binding)	1.14227	up	yes
TRINITY_DN11959_c0_g5	TRINITY_DN11959_c0_g5_i1;TRINITY_DN11959_c0_g5_i2	GO:0003674(molecular_function);GO:0008150(biological_process)	1.14175	up	yes
TRINITY_DN16084_c0_g3	TRINITY_DN16084_c0_g3_i1;TRINITY_DN16084_c0_g3_i2;TRINITY_DN16084_c0_g3_i3;TRINITY_DN16084_c0_g3_i4	GO:0003674(molecular_function);GO:0005634(nucleus);GO:0009506(plasmodesma);GO:0051513(regulation of monopolar cell growth)	1.14153	up	yes
TRINITY_DN16049_c1_g1	TRINITY_DN16049_c1_g1_i1;TRINITY_DN16049_c1_g1_i2;TRINITY_DN16049_c1_g1_i3;TRINITY_DN16049_c1_g1_i4;TRINITY_DN16049_c1_g1_i5;TRINITY_DN16049_c1_g1_i6	GO:0005737(cytoplasm);GO:0005783(endoplasmic reticulum);GO:0005789(endoplasmic reticulum membrane);GO:0006629(lipid metabolic process);GO:0016021(integral component of membrane);GO:0016491(oxidoreductase activity);GO:0030148(sphingolipid biosynthetic process);GO:0046872(metal ion binding);GO:0052631(sphingolipid delta-8 desaturase activity);GO:0055114(oxidation-reduction process);GO:0070417(cellu…	1.14085	up	yes
TRINITY_DN15307_c0_g2	TRINITY_DN15307_c0_g2_i1;TRINITY_DN15307_c0_g2_i2;TRINITY_DN15307_c0_g2_i3;TRINITY_DN15307_c0_g2_i4;TRINITY_DN15307_c0_g2_i5;TRINITY_DN15307_c0_g2_i6;TRINITY_DN15307_c0_g2_i7	GO:0003674(molecular_function);GO:0008150(biological_process)	1.13642	up	yes
TRINITY_DN5554_c0_g1	TRINITY_DN5554_c0_g1_i1	-	1.1355	up	yes
TRINITY_DN16055_c0_g4	TRINITY_DN16055_c0_g4_i1	GO:0000139(Golgi membrane);GO:0005634(nucleus);GO:0005794(Golgi apparatus);GO:0016021(integral component of membrane);GO:0016757(transferase activity, transferring glycosyl groups);GO:0016759(cellulose synthase activity);GO:0071555(cell wall organization)	1.13531	up	yes
TRINITY_DN16241_c0_g1	TRINITY_DN16241_c0_g1_i1;TRINITY_DN16241_c0_g1_i10;TRINITY_DN16241_c0_g1_i11;TRINITY_DN16241_c0_g1_i2;TRINITY_DN16241_c0_g1_i3;TRINITY_DN16241_c0_g1_i4;TRINITY_DN16241_c0_g1_i5;TRINITY_DN16241_c0_g1_i6;TRINITY_DN16241_c0_g1_i7;TRINITY_DN16241_c0_g1_i8;TRINITY_DN16241_c0_g1_i9	GO:0008422(beta-glucosidase activity);GO:0009651(response to salt stress);GO:0009725(response to hormone);GO:0019762(glucosinolate catabolic process)	1.13443	up	yes
TRINITY_DN12741_c0_g2	TRINITY_DN12741_c0_g2_i1;TRINITY_DN12741_c0_g2_i2;TRINITY_DN12741_c0_g2_i3	GO:0003674(molecular_function);GO:0009639(response to red or far red light);GO:0009959(negative gravitropism)	1.13384	up	yes
TRINITY_DN13306_c0_g2	TRINITY_DN13306_c0_g2_i1;TRINITY_DN13306_c0_g2_i2;TRINITY_DN13306_c0_g2_i3;TRINITY_DN13306_c0_g2_i4;TRINITY_DN13306_c0_g2_i5	GO:0005576(extracellular region);GO:0016042(lipid catabolic process);GO:0016788(hydrolase activity, acting on ester bonds);GO:0052689(carboxylic ester hydrolase activity)	1.13202	up	yes
TRINITY_DN10148_c0_g1	TRINITY_DN10148_c0_g1_i1	GO:0003674(molecular_function);GO:0005634(nucleus);GO:0008150(biological_process)	1.12868	up	yes
TRINITY_DN14408_c1_g2	TRINITY_DN14408_c1_g2_i1;TRINITY_DN14408_c1_g2_i2	GO:0009536(plastid)	1.12782	up	yes
TRINITY_DN15467_c1_g2	TRINITY_DN15467_c1_g2_i1	GO:0005737(cytoplasm);GO:0005980(glycogen catabolic process);GO:0008184(glycogen phosphorylase activity);GO:0030170(pyridoxal phosphate binding)	1.12769	up	yes
TRINITY_DN11813_c1_g1	TRINITY_DN11813_c1_g1_i1;TRINITY_DN11813_c1_g1_i2;TRINITY_DN11813_c1_g1_i3;TRINITY_DN11813_c1_g1_i4	GO:0004675(transmembrane receptor protein serine/threonine kinase activity);GO:0005199(structural constituent of cell wall);GO:0005524(ATP binding);GO:0005886(plasma membrane);GO:0006468(protein phosphorylation);GO:0007166(cell surface receptor signaling pathway);GO:0016021(integral component of membrane);GO:0016301(kinase activity);GO:0019901(protein kinase binding)	1.12661	up	yes
TRINITY_DN12161_c1_g1	TRINITY_DN12161_c1_g1_i1;TRINITY_DN12161_c1_g1_i2;TRINITY_DN12161_c1_g1_i3;TRINITY_DN12161_c1_g1_i4	GO:0005768(endosome);GO:0005774(vacuolar membrane);GO:0005802(trans-Golgi network);GO:0008757(S-adenosylmethionine-dependent methyltransferase activity);GO:0032259(methylation)	1.12524	up	yes
TRINITY_DN16536_c0_g8	TRINITY_DN16536_c0_g8_i1	GO:0005576(extracellular region);GO:0005615(extracellular space);GO:0006953(acute-phase response);GO:0007252(I-kappaB phosphorylation);GO:0034364(high-density lipoprotein particle);GO:0035634(response to stilbenoid);GO:0035662(Toll-like receptor 4 binding);GO:0042056(chemoattractant activity);GO:0060326(cell chemotaxis);GO:0071347(cellular response to interleukin-1)	1.12329	up	yes
TRINITY_DN11385_c0_g8	TRINITY_DN11385_c0_g8_i1	GO:0008150(biological_process);GO:0009507(chloroplast);GO:0046872(metal ion binding)	1.1194	up	yes
TRINITY_DN13124_c0_g2	TRINITY_DN13124_c0_g2_i1	GO:0005515(protein binding);GO:0005634(nucleus);GO:0005794(Golgi apparatus);GO:0005886(plasma membrane);GO:0006351(transcription, DNA-templated);GO:0009416(response to light stimulus);GO:0009718(anthocyanin-containing compound biosynthetic process);GO:0015995(chlorophyll biosynthetic process);GO:0045893(positive regulation of transcription, DNA-templated)	1.1178	up	yes
TRINITY_DN14055_c0_g1	TRINITY_DN14055_c0_g1_i1;TRINITY_DN14055_c0_g1_i2;TRINITY_DN14055_c0_g1_i3	GO:0005634(nucleus);GO:0005829(cytosol);GO:0009691(cytokinin biosynthetic process);GO:0016799(hydrolase activity, hydrolyzing N-glycosyl compounds)	1.11643	up	yes
TRINITY_DN15494_c0_g1	TRINITY_DN15494_c0_g1_i1	GO:0005794(Golgi apparatus);GO:0016413(O-acetyltransferase activity);GO:0071554(cell wall organization or biogenesis)	1.11591	up	yes
TRINITY_DN9396_c0_g1	TRINITY_DN9396_c0_g1_i1;TRINITY_DN9396_c0_g1_i2;TRINITY_DN9396_c0_g1_i3	-	1.11461	up	yes
TRINITY_DN9740_c0_g1	TRINITY_DN9740_c0_g1_i1;TRINITY_DN9740_c0_g1_i2	GO:0005515(protein binding);GO:0005634(nucleus);GO:0005834(heterotrimeric G-protein complex);GO:0007049(cell cycle);GO:0007165(signal transduction);GO:0010997(anaphase-promoting complex binding);GO:0016567(protein ubiquitination);GO:0019900(kinase binding);GO:0033597(mitotic checkpoint complex);GO:0051301(cell division);GO:0097027(ubiquitin-protein transferase activator activity);GO:1904668(posit…	1.10953	up	yes
TRINITY_DN14747_c0_g8	TRINITY_DN14747_c0_g8_i1;TRINITY_DN14747_c0_g8_i2;TRINITY_DN14747_c0_g8_i3	GO:0003674(molecular_function);GO:0005739(mitochondrion);GO:0008150(biological_process);GO:0016021(integral component of membrane)	1.10866	up	yes
TRINITY_DN12790_c0_g1	TRINITY_DN12790_c0_g1_i1	GO:0005618(cell wall);GO:0033609(oxalate metabolic process);GO:0046564(oxalate decarboxylase activity)	1.10843	up	yes
TRINITY_DN15062_c1_g2	TRINITY_DN15062_c1_g2_i1	GO:0005634(nucleus);GO:0006633(fatty acid biosynthetic process);GO:0009409(response to cold);GO:0009416(response to light stimulus);GO:0016021(integral component of membrane);GO:0102336(3-oxo-arachidoyl-CoA synthase activity);GO:0102337(3-oxo-cerotoyl-CoA synthase activity);GO:0102338(3-oxo-lignoceronyl-CoA synthase activity);GO:0102756(very-long-chain 3-ketoacyl-CoA synthase activity)	1.10665	up	yes
TRINITY_DN10352_c0_g1	TRINITY_DN10352_c0_g1_i1;TRINITY_DN10352_c0_g1_i2	GO:0005634(nucleus);GO:0030246(carbohydrate binding)	1.10634	up	yes
TRINITY_DN14878_c0_g6	TRINITY_DN14878_c0_g6_i1	GO:0005739(mitochondrion);GO:0005777(peroxisome);GO:0016208(AMP binding)	1.10537	up	yes
TRINITY_DN12285_c0_g2	TRINITY_DN12285_c0_g2_i1	GO:0005829(cytosol);GO:0006094(gluconeogenesis);GO:0006096(glycolytic process);GO:0043456(regulation of pentose-phosphate shunt);GO:0046538(2,3-bisphosphoglycerate-dependent phosphoglycerate mutase activity)	1.10537	up	yes
TRINITY_DN13361_c0_g2	TRINITY_DN13361_c0_g2_i1;TRINITY_DN13361_c0_g2_i2;TRINITY_DN13361_c0_g2_i3;TRINITY_DN13361_c0_g2_i4	GO:0005634(nucleus);GO:0005737(cytoplasm);GO:0006457(protein folding)	1.10537	up	yes
TRINITY_DN12246_c1_g1	TRINITY_DN12246_c1_g1_i1;TRINITY_DN12246_c1_g1_i2;TRINITY_DN12246_c1_g1_i3;TRINITY_DN12246_c1_g1_i4;TRINITY_DN12246_c1_g1_i5;TRINITY_DN12246_c1_g1_i6;TRINITY_DN12246_c1_g1_i7;TRINITY_DN12246_c1_g1_i8;TRINITY_DN12246_c1_g1_i9	GO:0004674(protein serine/threonine kinase activity);GO:0004675(transmembrane receptor protein serine/threonine kinase activity);GO:0005524(ATP binding);GO:0005634(nucleus);GO:0006468(protein phosphorylation);GO:0016301(kinase activity);GO:0016310(phosphorylation)	1.1048	up	yes
TRINITY_DN10740_c0_g6	TRINITY_DN10740_c0_g6_i1;TRINITY_DN10740_c0_g6_i2	GO:0005886(plasma membrane)	1.10379	up	yes
TRINITY_DN9095_c0_g2	TRINITY_DN9095_c0_g2_i1	GO:0005794(Golgi apparatus);GO:0008150(biological_process);GO:0016757(transferase activity, transferring glycosyl groups)	1.10364	up	yes
TRINITY_DN5420_c0_g1	TRINITY_DN5420_c0_g1_i1	GO:0003824(catalytic activity);GO:0004457(lactate dehydrogenase activity);GO:0004459(L-lactate dehydrogenase activity);GO:0005515(protein binding);GO:0005737(cytoplasm);GO:0005739(mitochondrion);GO:0005829(cytosol);GO:0005975(carbohydrate metabolic process);GO:0016491(oxidoreductase activity);GO:0016616(oxidoreductase activity, acting on the CH-OH group of donors, NAD or NADP as acceptor);GO:0019…	1.10319	up	yes
TRINITY_DN15834_c0_g2	TRINITY_DN15834_c0_g2_i1;TRINITY_DN15834_c0_g2_i2;TRINITY_DN15834_c0_g2_i3	GO:0004497(monooxygenase activity);GO:0007275(multicellular organism development);GO:0010268(brassinosteroid homeostasis);GO:0016125(sterol metabolic process);GO:0016132(brassinosteroid biosynthetic process)	1.10298	up	yes
TRINITY_DN10319_c0_g1	TRINITY_DN10319_c0_g1_i1;TRINITY_DN10319_c0_g1_i2	-	1.10122	up	yes
TRINITY_DN10688_c0_g1	TRINITY_DN10688_c0_g1_i1;TRINITY_DN10688_c0_g1_i2;TRINITY_DN10688_c0_g1_i3	GO:0003700(DNA binding transcription factor activity);GO:0005515(protein binding);GO:0005634(nucleus);GO:0006351(transcription, DNA-templated);GO:0006355(regulation of transcription, DNA-templated);GO:0009751(response to salicylic acid);GO:0009753(response to jasmonic acid);GO:0009862(systemic acquired resistance, salicylic acid mediated signaling pathway);GO:0009864(induced systemic resistance, …	1.10115	up	yes
TRINITY_DN9765_c0_g1	TRINITY_DN9765_c0_g1_i1;TRINITY_DN9765_c0_g1_i2;TRINITY_DN9765_c0_g1_i3;TRINITY_DN9765_c0_g1_i4	-	1.0995	up	yes
TRINITY_DN14628_c0_g9	TRINITY_DN14628_c0_g9_i1	-	1.0994	up	yes
TRINITY_DN13992_c0_g1	TRINITY_DN13992_c0_g1_i1;TRINITY_DN13992_c0_g1_i2;TRINITY_DN13992_c0_g1_i3;TRINITY_DN13992_c0_g1_i4;TRINITY_DN13992_c0_g1_i5;TRINITY_DN13992_c0_g1_i6;TRINITY_DN13992_c0_g1_i7;TRINITY_DN13992_c0_g1_i8	GO:0005515(protein binding);GO:0005737(cytoplasm);GO:0016021(integral component of membrane);GO:0030154(cell differentiation);GO:0040008(regulation of growth);GO:2000012(regulation of auxin polar transport)	1.09916	up	yes
TRINITY_DN11993_c0_g3	TRINITY_DN11993_c0_g3_i1;TRINITY_DN11993_c0_g3_i2;TRINITY_DN11993_c0_g3_i3	GO:0003735(structural constituent of ribosome);GO:0006412(translation)	1.09863	up	yes
TRINITY_DN15287_c0_g3	TRINITY_DN15287_c0_g3_i1;TRINITY_DN15287_c0_g3_i2	GO:0005768(endosome)	1.09786	up	yes
TRINITY_DN15317_c0_g6	TRINITY_DN15317_c0_g6_i1	-	1.09786	up	yes
TRINITY_DN13054_c0_g5	TRINITY_DN13054_c0_g5_i1;TRINITY_DN13054_c0_g5_i2	GO:0009735(response to cytokinin)	1.09713	up	yes
TRINITY_DN16003_c0_g3	TRINITY_DN16003_c0_g3_i1;TRINITY_DN16003_c0_g3_i2;TRINITY_DN16003_c0_g3_i3;TRINITY_DN16003_c0_g3_i4;TRINITY_DN16003_c0_g3_i5;TRINITY_DN16003_c0_g3_i6;TRINITY_DN16003_c0_g3_i7	GO:0000139(Golgi membrane);GO:0005794(Golgi apparatus);GO:0010192(mucilage biosynthetic process);GO:0016021(integral component of membrane);GO:0016757(transferase activity, transferring glycosyl groups);GO:0047259(glucomannan 4-beta-mannosyltransferase activity);GO:0048359(mucilage metabolic process involved in seed coat development);GO:0051753(mannan synthase activity);GO:0071555(cell wall organ…	1.09685	up	yes
TRINITY_DN14754_c0_g2	TRINITY_DN14754_c0_g2_i1;TRINITY_DN14754_c0_g2_i2	GO:0005794(Golgi apparatus);GO:0005886(plasma membrane);GO:0016021(integral component of membrane);GO:0019706(protein-cysteine S-palmitoyltransferase activity);GO:0030659(cytoplasmic vesicle membrane)	1.09613	up	yes
TRINITY_DN16345_c0_g1	TRINITY_DN16345_c0_g1_i1;TRINITY_DN16345_c0_g1_i10;TRINITY_DN16345_c0_g1_i2;TRINITY_DN16345_c0_g1_i3;TRINITY_DN16345_c0_g1_i4;TRINITY_DN16345_c0_g1_i5;TRINITY_DN16345_c0_g1_i6;TRINITY_DN16345_c0_g1_i7;TRINITY_DN16345_c0_g1_i8;TRINITY_DN16345_c0_g1_i9	GO:0005515(protein binding)	1.09415	up	yes
TRINITY_DN11971_c0_g9	TRINITY_DN11971_c0_g9_i1	GO:0003677(DNA binding);GO:0003700(DNA binding transcription factor activity);GO:0005515(protein binding);GO:0005634(nucleus);GO:0006351(transcription, DNA-templated);GO:0006355(regulation of transcription, DNA-templated);GO:0008289(lipid binding);GO:0043565(sequence-specific DNA binding)	1.09282	up	yes
TRINITY_DN14550_c0_g4	TRINITY_DN14550_c0_g4_i1;TRINITY_DN14550_c0_g4_i2	-	1.09274	up	yes
TRINITY_DN14578_c1_g2	TRINITY_DN14578_c1_g2_i1;TRINITY_DN14578_c1_g2_i2	GO:0004190(aspartic-type endopeptidase activity);GO:0006508(proteolysis);GO:0030163(protein catabolic process)	1.08914	up	yes
TRINITY_DN13286_c0_g5	TRINITY_DN13286_c0_g5_i1;TRINITY_DN13286_c0_g5_i2	GO:0006679(glucosylceramide biosynthetic process);GO:0008120(ceramide glucosyltransferase activity);GO:0016020(membrane)	1.08887	up	yes
TRINITY_DN14335_c0_g1	TRINITY_DN14335_c0_g1_i1;TRINITY_DN14335_c0_g1_i2;TRINITY_DN14335_c0_g1_i3;TRINITY_DN14335_c0_g1_i4	GO:0004553(hydrolase activity, hydrolyzing O-glycosyl compounds);GO:0030247(polysaccharide binding);GO:0046658(anchored component of plasma membrane)	1.08829	up	yes
TRINITY_DN10965_c0_g3	TRINITY_DN10965_c0_g3_i1	GO:0003674(molecular_function);GO:0009639(response to red or far red light);GO:0009959(negative gravitropism)	1.08548	up	yes
TRINITY_DN14005_c0_g2	TRINITY_DN14005_c0_g2_i1;TRINITY_DN14005_c0_g2_i2;TRINITY_DN14005_c0_g2_i3;TRINITY_DN14005_c0_g2_i4;TRINITY_DN14005_c0_g2_i5;TRINITY_DN14005_c0_g2_i6	GO:0008150(biological_process);GO:0009507(chloroplast);GO:0009570(chloroplast stroma)	1.08516	up	yes
TRINITY_DN12192_c0_g1	TRINITY_DN12192_c0_g1_i1;TRINITY_DN12192_c0_g1_i2;TRINITY_DN12192_c0_g1_i3	GO:0042802(identical protein binding)	1.07961	up	yes
TRINITY_DN14219_c1_g3	TRINITY_DN14219_c1_g3_i1;TRINITY_DN14219_c1_g3_i2	GO:0005215(transporter activity);GO:0005515(protein binding);GO:0005886(plasma membrane);GO:0006820(anion transport);GO:0006873(cellular ion homeostasis);GO:0008308(voltage-gated anion channel activity);GO:0008509(anion transmembrane transporter activity);GO:0009270(response to humidity);GO:0009737(response to abscisic acid);GO:0009738(abscisic acid-activated signaling pathway);GO:0010037(respons…	1.07941	up	yes
TRINITY_DN12105_c0_g8	TRINITY_DN12105_c0_g8_i1;TRINITY_DN12105_c0_g8_i2	GO:0004864(protein phosphatase inhibitor activity);GO:0005634(nucleus);GO:0005737(cytoplasm);GO:0009738(abscisic acid-activated signaling pathway);GO:0010427(abscisic acid binding);GO:0080163(regulation of protein serine/threonine phosphatase activity)	1.07913	up	yes
TRINITY_DN13246_c1_g5	TRINITY_DN13246_c1_g5_i1	GO:0005737(cytoplasm);GO:0030001(metal ion transport);GO:0046914(transition metal ion binding);GO:0046916(cellular transition metal ion homeostasis)	1.07835	up	yes
TRINITY_DN10355_c0_g2	TRINITY_DN10355_c0_g2_i1;TRINITY_DN10355_c0_g2_i2;TRINITY_DN10355_c0_g2_i3	GO:0005737(cytoplasm);GO:0009733(response to auxin);GO:0016874(ligase activity)	1.07685	up	yes
TRINITY_DN12780_c0_g2	TRINITY_DN12780_c0_g2_i1;TRINITY_DN12780_c0_g2_i2;TRINITY_DN12780_c0_g2_i3;TRINITY_DN12780_c0_g2_i4;TRINITY_DN12780_c0_g2_i5;TRINITY_DN12780_c0_g2_i6	GO:0004674(protein serine/threonine kinase activity);GO:0004675(transmembrane receptor protein serine/threonine kinase activity);GO:0005515(protein binding);GO:0005524(ATP binding);GO:0005886(plasma membrane);GO:0006468(protein phosphorylation);GO:0007166(cell surface receptor signaling pathway);GO:0016301(kinase activity);GO:0042742(defense response to bacterium)	1.07626	up	yes
TRINITY_DN14139_c0_g1	TRINITY_DN14139_c0_g1_i1	-	1.07483	up	yes
TRINITY_DN7252_c0_g1	TRINITY_DN7252_c0_g1_i1	GO:0000166(nucleotide binding);GO:0002039(p53 binding);GO:0002244(hematopoietic progenitor cell differentiation);GO:0003723(RNA binding);GO:0003746(translation elongation factor activity);GO:0003924(GTPase activity);GO:0005515(protein binding);GO:0005525(GTP binding);GO:0005634(nucleus);GO:0005737(cytoplasm);GO:0005829(cytosol);GO:0005844(polysome);GO:0005886(plasma membrane);GO:0006412(translati…	1.07483	up	yes
TRINITY_DN14315_c0_g3	TRINITY_DN14315_c0_g3_i1;TRINITY_DN14315_c0_g3_i2;TRINITY_DN14315_c0_g3_i3	-	1.07389	up	yes
TRINITY_DN13473_c0_g5	TRINITY_DN13473_c0_g5_i1	GO:0000165(MAPK cascade);GO:0004707(MAP kinase activity);GO:0005515(protein binding);GO:0005524(ATP binding);GO:0005634(nucleus);GO:0005737(cytoplasm);GO:0006952(defense response);GO:0007165(signal transduction);GO:0007623(circadian rhythm);GO:0010468(regulation of gene expression);GO:0016301(kinase activity);GO:0042542(response to hydrogen peroxide)	1.07336	up	yes
TRINITY_DN12738_c0_g12	TRINITY_DN12738_c0_g12_i1;TRINITY_DN12738_c0_g12_i2	GO:0005576(extracellular region);GO:0009505(plant-type cell wall);GO:0009506(plasmodesma);GO:0016042(lipid catabolic process);GO:0016788(hydrolase activity, acting on ester bonds);GO:0052689(carboxylic ester hydrolase activity)	1.07286	up	yes
TRINITY_DN12849_c0_g3	TRINITY_DN12849_c0_g3_i1	GO:0005215(transporter activity);GO:0005524(ATP binding);GO:0005886(plasma membrane);GO:0006810(transport);GO:0015439(heme-transporting ATPase activity);GO:0016020(membrane);GO:0017004(cytochrome complex assembly);GO:0103115(protoheme IX ABC transporter activity)	1.07149	up	yes
TRINITY_DN16282_c0_g4	TRINITY_DN16282_c0_g4_i1;TRINITY_DN16282_c0_g4_i2	GO:0005634(nucleus)	1.07027	up	yes
TRINITY_DN11524_c0_g4	TRINITY_DN11524_c0_g4_i1;TRINITY_DN11524_c0_g4_i2	GO:0005794(Golgi apparatus);GO:0005886(plasma membrane);GO:0016021(integral component of membrane);GO:0019706(protein-cysteine S-palmitoyltransferase activity)	1.06892	up	yes
TRINITY_DN16313_c0_g2	TRINITY_DN16313_c0_g2_i1	GO:0005886(plasma membrane);GO:0010215(cellulose microfibril organization);GO:0016049(cell growth);GO:0031225(anchored component of membrane)	1.06892	up	yes
TRINITY_DN16064_c0_g1	TRINITY_DN16064_c0_g1_i1;TRINITY_DN16064_c0_g1_i10;TRINITY_DN16064_c0_g1_i11;TRINITY_DN16064_c0_g1_i12;TRINITY_DN16064_c0_g1_i13;TRINITY_DN16064_c0_g1_i14;TRINITY_DN16064_c0_g1_i15;TRINITY_DN16064_c0_g1_i16;TRINITY_DN16064_c0_g1_i17;TRINITY_DN16064_c0_g1_i18;TRINITY_DN16064_c0_g1_i19;TRINITY_DN16064_c0_g1_i2;TRINITY_DN16064_c0_g1_i20;TRINITY_DN16064_c0_g1_i21;TRINITY_DN16064_c0_g1_i22;TRINITY_DN1…	-	1.06857	up	yes
TRINITY_DN13370_c2_g2	TRINITY_DN13370_c2_g2_i1	GO:0005575(cellular_component);GO:0007275(multicellular organism development);GO:0016491(oxidoreductase activity);GO:0055114(oxidation-reduction process)	1.06754	up	yes
TRINITY_DN15717_c0_g1	TRINITY_DN15717_c0_g1_i1;TRINITY_DN15717_c0_g1_i2;TRINITY_DN15717_c0_g1_i3;TRINITY_DN15717_c0_g1_i4;TRINITY_DN15717_c0_g1_i5	GO:0009409(response to cold);GO:0009414(response to water deprivation);GO:0009534(chloroplast thylakoid);GO:0009651(response to salt stress);GO:0044183(protein binding involved in protein folding);GO:0061077(chaperone-mediated protein folding)	1.06651	up	yes
TRINITY_DN9625_c0_g1	TRINITY_DN9625_c0_g1_i1	GO:0005634(nucleus);GO:0005737(cytoplasm);GO:0006351(transcription, DNA-templated);GO:0006355(regulation of transcription, DNA-templated);GO:0009416(response to light stimulus);GO:0040008(regulation of growth);GO:0046983(protein dimerization activity)	1.06636	up	yes
TRINITY_DN11319_c0_g2	TRINITY_DN11319_c0_g2_i1;TRINITY_DN11319_c0_g2_i2	-	1.06444	up	yes
TRINITY_DN11921_c0_g2	TRINITY_DN11921_c0_g2_i1;TRINITY_DN11921_c0_g2_i2;TRINITY_DN11921_c0_g2_i3;TRINITY_DN11921_c0_g2_i4;TRINITY_DN11921_c0_g2_i5;TRINITY_DN11921_c0_g2_i6;TRINITY_DN11921_c0_g2_i7	GO:0005737(cytoplasm);GO:0006457(protein folding)	1.06346	up	yes
TRINITY_DN11741_c1_g3	TRINITY_DN11741_c1_g3_i1;TRINITY_DN11741_c1_g3_i10;TRINITY_DN11741_c1_g3_i2;TRINITY_DN11741_c1_g3_i3;TRINITY_DN11741_c1_g3_i4;TRINITY_DN11741_c1_g3_i5;TRINITY_DN11741_c1_g3_i6;TRINITY_DN11741_c1_g3_i7;TRINITY_DN11741_c1_g3_i8;TRINITY_DN11741_c1_g3_i9	GO:0001678(cellular glucose homeostasis);GO:0004340(glucokinase activity);GO:0005829(cytosol);GO:0006096(glycolytic process);GO:0008865(fructokinase activity);GO:0019158(mannokinase activity)	1.06339	up	yes
TRINITY_DN13756_c0_g4	TRINITY_DN13756_c0_g4_i1;TRINITY_DN13756_c0_g4_i2	GO:0004124(cysteine synthase activity);GO:0005737(cytoplasm);GO:0005739(mitochondrion);GO:0006535(cysteine biosynthetic process from serine);GO:0016740(transferase activity);GO:0019344(cysteine biosynthetic process);GO:0030170(pyridoxal phosphate binding);GO:0050017(L-3-cyanoalanine synthase activity)	1.06188	up	yes
TRINITY_DN14537_c2_g8	TRINITY_DN14537_c2_g8_i1	GO:0003674(molecular_function);GO:0005576(extracellular region);GO:0008150(biological_process);GO:0016021(integral component of membrane)	1.05941	up	yes
TRINITY_DN10679_c0_g1	TRINITY_DN10679_c0_g1_i1;TRINITY_DN10679_c0_g1_i2;TRINITY_DN10679_c0_g1_i3;TRINITY_DN10679_c0_g1_i4	GO:0016787(hydrolase activity)	1.05885	up	yes
TRINITY_DN13726_c0_g2	TRINITY_DN13726_c0_g2_i1;TRINITY_DN13726_c0_g2_i2	GO:0005737(cytoplasm);GO:0006596(polyamine biosynthetic process);GO:0010487(thermospermine synthase activity)	1.05827	up	yes
TRINITY_DN15284_c1_g4	TRINITY_DN15284_c1_g4_i1;TRINITY_DN15284_c1_g4_i2;TRINITY_DN15284_c1_g4_i3;TRINITY_DN15284_c1_g4_i4;TRINITY_DN15284_c1_g4_i5;TRINITY_DN15284_c1_g4_i6;TRINITY_DN15284_c1_g4_i7;TRINITY_DN15284_c1_g4_i8;TRINITY_DN15284_c1_g4_i9	GO:0003700(DNA binding transcription factor activity);GO:0005634(nucleus);GO:0006351(transcription, DNA-templated);GO:0006355(regulation of transcription, DNA-templated);GO:0040008(regulation of growth);GO:0043565(sequence-specific DNA binding);GO:0046983(protein dimerization activity)	1.0577	up	yes
TRINITY_DN13702_c0_g4	TRINITY_DN13702_c0_g4_i1;TRINITY_DN13702_c0_g4_i2	GO:0004672(protein kinase activity);GO:0004674(protein serine/threonine kinase activity);GO:0004675(transmembrane receptor protein serine/threonine kinase activity);GO:0005524(ATP binding);GO:0005576(extracellular region);GO:0005886(plasma membrane);GO:0006468(protein phosphorylation);GO:0007166(cell surface receptor signaling pathway);GO:0007169(transmembrane receptor protein tyrosine kinase sig…	1.05735	up	yes
TRINITY_DN13075_c1_g4	TRINITY_DN13075_c1_g4_i1	GO:0003674(molecular_function);GO:0005739(mitochondrion);GO:0005886(plasma membrane);GO:0008150(biological_process);GO:0016021(integral component of membrane)	1.05518	up	yes
TRINITY_DN11214_c0_g1	TRINITY_DN11214_c0_g1_i1;TRINITY_DN11214_c0_g1_i2;TRINITY_DN11214_c0_g1_i3;TRINITY_DN11214_c0_g1_i4;TRINITY_DN11214_c0_g1_i5;TRINITY_DN11214_c0_g1_i6	GO:0007275(multicellular organism development);GO:0009687(abscisic acid metabolic process);GO:0010268(brassinosteroid homeostasis);GO:0016125(sterol metabolic process);GO:0016132(brassinosteroid biosynthetic process);GO:0016709(oxidoreductase activity, acting on paired donors, with incorporation or reduction of molecular oxygen, NAD(P)H as one donor, and incorporation of one atom of oxygen)	1.05395	up	yes
TRINITY_DN12066_c0_g3	TRINITY_DN12066_c0_g3_i1;TRINITY_DN12066_c0_g3_i2	GO:0003700(DNA binding transcription factor activity);GO:0005634(nucleus);GO:0006351(transcription, DNA-templated);GO:0007275(multicellular organism development);GO:0043565(sequence-specific DNA binding);GO:0044212(transcription regulatory region DNA binding);GO:0045893(positive regulation of transcription, DNA-templated);GO:2000652(regulation of secondary cell wall biogenesis)	1.05099	up	yes
TRINITY_DN8835_c0_g1	TRINITY_DN8835_c0_g1_i1;TRINITY_DN8835_c0_g1_i2;TRINITY_DN8835_c0_g1_i3	-	1.04721	up	yes
TRINITY_DN11539_c0_g7	TRINITY_DN11539_c0_g7_i1	GO:0005634(nucleus);GO:0005737(cytoplasm)	1.04493	up	yes
TRINITY_DN11100_c1_g4	TRINITY_DN11100_c1_g4_i1;TRINITY_DN11100_c1_g4_i2	GO:0005575(cellular_component);GO:0006950(response to stress);GO:0016787(hydrolase activity)	1.04389	up	yes
TRINITY_DN12964_c0_g4	TRINITY_DN12964_c0_g4_i1;TRINITY_DN12964_c0_g4_i2	GO:0016787(hydrolase activity)	1.04123	up	yes
TRINITY_DN10824_c0_g3	TRINITY_DN10824_c0_g3_i1;TRINITY_DN10824_c0_g3_i2	GO:0008483(transaminase activity);GO:0009058(biosynthetic process);GO:0009507(chloroplast);GO:0009862(systemic acquired resistance, salicylic acid mediated signaling pathway);GO:0010150(leaf senescence);GO:0030170(pyridoxal phosphate binding);GO:0042742(defense response to bacterium)	1.04117	up	yes
TRINITY_DN11864_c0_g2	TRINITY_DN11864_c0_g2_i1	GO:0004672(protein kinase activity);GO:0004674(protein serine/threonine kinase activity);GO:0004675(transmembrane receptor protein serine/threonine kinase activity);GO:0005524(ATP binding);GO:0005576(extracellular region);GO:0005634(nucleus);GO:0005829(cytosol);GO:0005886(plasma membrane);GO:0006468(protein phosphorylation);GO:0007166(cell surface receptor signaling pathway);GO:0007169(transmembr…	1.04109	up	yes
TRINITY_DN10407_c0_g1	TRINITY_DN10407_c0_g1_i1	GO:0044255(cellular lipid metabolic process);GO:0052689(carboxylic ester hydrolase activity)	1.04094	up	yes
TRINITY_DN14381_c0_g1	TRINITY_DN14381_c0_g1_i1;TRINITY_DN14381_c0_g1_i2	GO:0005096(GTPase activator activity);GO:0005737(cytoplasm);GO:0005886(plasma membrane);GO:0007165(signal transduction);GO:0007275(multicellular organism development);GO:0009531(secondary cell wall);GO:0009664(plant-type cell wall organization)	1.04092	up	yes
TRINITY_DN12894_c0_g3	TRINITY_DN12894_c0_g3_i1;TRINITY_DN12894_c0_g3_i2;TRINITY_DN12894_c0_g3_i3;TRINITY_DN12894_c0_g3_i4	GO:0005794(Golgi apparatus);GO:0016413(O-acetyltransferase activity);GO:0071554(cell wall organization or biogenesis)	1.04059	up	yes
TRINITY_DN9466_c0_g1	TRINITY_DN9466_c0_g1_i1	GO:0003677(DNA binding);GO:0003700(DNA binding transcription factor activity);GO:0005634(nucleus);GO:0005643(nuclear pore);GO:0006351(transcription, DNA-templated);GO:0006355(regulation of transcription, DNA-templated);GO:0006952(defense response);GO:0009873(ethylene-activated signaling pathway);GO:0010087(phloem or xylem histogenesis);GO:0010200(response to chitin);GO:0045893(positive regulation…	1.04048	up	yes
TRINITY_DN13809_c0_g7	TRINITY_DN13809_c0_g7_i1	GO:0046658(anchored component of plasma membrane)	1.03989	up	yes
TRINITY_DN15274_c0_g6	TRINITY_DN15274_c0_g6_i1;TRINITY_DN15274_c0_g6_i2;TRINITY_DN15274_c0_g6_i3	GO:0007275(multicellular organism development);GO:0010268(brassinosteroid homeostasis);GO:0016125(sterol metabolic process);GO:0016132(brassinosteroid biosynthetic process);GO:0016709(oxidoreductase activity, acting on paired donors, with incorporation or reduction of molecular oxygen, NAD(P)H as one donor, and incorporation of one atom of oxygen)	1.03809	up	yes
TRINITY_DN5757_c0_g1	TRINITY_DN5757_c0_g1_i1	GO:0000045(autophagosome assembly);GO:0004175(endopeptidase activity);GO:0004190(aspartic-type endopeptidase activity);GO:0005576(extracellular region);GO:0005615(extracellular space);GO:0005739(mitochondrion);GO:0005764(lysosome);GO:0006508(proteolysis);GO:0008233(peptidase activity);GO:0016787(hydrolase activity);GO:0030163(protein catabolic process);GO:0031012(extracellular matrix);GO:0042277(…	1.03772	up	yes
TRINITY_DN11748_c0_g1	TRINITY_DN11748_c0_g1_i1	GO:0000981(RNA polymerase II transcription factor activity, sequence-specific DNA binding);GO:0001135(transcription factor activity, RNA polymerase II transcription factor recruiting);GO:0003677(DNA binding);GO:0003700(DNA binding transcription factor activity);GO:0005515(protein binding);GO:0005634(nucleus);GO:0006351(transcription, DNA-templated);GO:0006357(regulation of transcription by RNA po…	1.0316	up	yes
TRINITY_DN10915_c0_g2	TRINITY_DN10915_c0_g2_i1;TRINITY_DN10915_c0_g2_i2;TRINITY_DN10915_c0_g2_i3;TRINITY_DN10915_c0_g2_i4;TRINITY_DN10915_c0_g2_i5	GO:0007165(signal transduction);GO:0009507(chloroplast)	1.03097	up	yes
TRINITY_DN15459_c0_g3	TRINITY_DN15459_c0_g3_i1	GO:0005634(nucleus);GO:0005886(plasma membrane);GO:0006351(transcription, DNA-templated);GO:0045892(negative regulation of transcription, DNA-templated)	1.02965	up	yes
TRINITY_DN11779_c1_g1	TRINITY_DN11779_c1_g1_i1;TRINITY_DN11779_c1_g1_i2	GO:0005215(transporter activity);GO:0006810(transport);GO:0016020(membrane);GO:0016021(integral component of membrane)	1.02965	up	yes
TRINITY_DN13058_c0_g7	TRINITY_DN13058_c0_g7_i1	GO:0008168(methyltransferase activity);GO:0032259(methylation)	1.02855	up	yes
TRINITY_DN14626_c0_g3	TRINITY_DN14626_c0_g3_i1;TRINITY_DN14626_c0_g3_i2;TRINITY_DN14626_c0_g3_i3;TRINITY_DN14626_c0_g3_i4;TRINITY_DN14626_c0_g3_i5;TRINITY_DN14626_c0_g3_i6	-	1.02748	up	yes
TRINITY_DN10589_c0_g6	TRINITY_DN10589_c0_g6_i1;TRINITY_DN10589_c0_g6_i2;TRINITY_DN10589_c0_g6_i3;TRINITY_DN10589_c0_g6_i4;TRINITY_DN10589_c0_g6_i5	GO:0003964(RNA-directed DNA polymerase activity);GO:0005737(cytoplasm)	1.02697	up	yes
TRINITY_DN11134_c0_g3	TRINITY_DN11134_c0_g3_i1;TRINITY_DN11134_c0_g3_i2;TRINITY_DN11134_c0_g3_i3;TRINITY_DN11134_c0_g3_i4	GO:0005737(cytoplasm);GO:0005886(plasma membrane);GO:0006950(response to stress);GO:0009269(response to desiccation);GO:0016787(hydrolase activity)	1.02594	up	yes
TRINITY_DN11254_c0_g2	TRINITY_DN11254_c0_g2_i1	GO:0016021(integral component of membrane);GO:0042626(ATPase activity, coupled to transmembrane movement of substances);GO:0055085(transmembrane transport)	1.02589	up	yes
TRINITY_DN11497_c0_g7	TRINITY_DN11497_c0_g7_i1	GO:0004864(protein phosphatase inhibitor activity);GO:0005634(nucleus);GO:0005737(cytoplasm);GO:0009738(abscisic acid-activated signaling pathway);GO:0010427(abscisic acid binding);GO:0080163(regulation of protein serine/threonine phosphatase activity)	1.02545	up	yes
TRINITY_DN11410_c0_g2	TRINITY_DN11410_c0_g2_i1;TRINITY_DN11410_c0_g2_i2;TRINITY_DN11410_c0_g2_i3;TRINITY_DN11410_c0_g2_i4;TRINITY_DN11410_c0_g2_i5;TRINITY_DN11410_c0_g2_i6;TRINITY_DN11410_c0_g2_i7;TRINITY_DN11410_c0_g2_i8;TRINITY_DN11410_c0_g2_i9	GO:0003677(DNA binding);GO:0003700(DNA binding transcription factor activity);GO:0005515(protein binding);GO:0005634(nucleus);GO:0007275(multicellular organism development);GO:0009909(regulation of flower development);GO:0009933(meristem structural organization);GO:0009944(polarity specification of adaxial/abaxial axis);GO:0010093(specification of floral organ identity);GO:0010154(fruit developme…	1.02516	up	yes
TRINITY_DN14467_c0_g4	TRINITY_DN14467_c0_g4_i1	GO:0004674(protein serine/threonine kinase activity);GO:0005515(protein binding);GO:0005524(ATP binding);GO:0005886(plasma membrane);GO:0006468(protein phosphorylation);GO:0007169(transmembrane receptor protein tyrosine kinase signaling pathway);GO:0009505(plant-type cell wall);GO:0009507(chloroplast);GO:0009570(chloroplast stroma);GO:0010069(zygote asymmetric cytokinesis in embryo sac);GO:001007…	1.02494	up	yes
TRINITY_DN16571_c1_g9	TRINITY_DN16571_c1_g9_i1	GO:0004601(peroxidase activity);GO:0020037(heme binding)	1.02465	up	yes
TRINITY_DN11723_c0_g5	TRINITY_DN11723_c0_g5_i1;TRINITY_DN11723_c0_g5_i2;TRINITY_DN11723_c0_g5_i3;TRINITY_DN11723_c0_g5_i4	-	1.02415	up	yes
TRINITY_DN11649_c0_g7	TRINITY_DN11649_c0_g7_i1;TRINITY_DN11649_c0_g7_i2;TRINITY_DN11649_c0_g7_i3	GO:0005576(extracellular region);GO:0008150(biological_process)	1.02306	up	yes
TRINITY_DN12788_c0_g4	TRINITY_DN12788_c0_g4_i1	GO:0004596(peptide alpha-N-acetyltransferase activity);GO:0005737(cytoplasm);GO:0017196(N-terminal peptidyl-methionine acetylation)	1.0228	up	yes
TRINITY_DN14763_c0_g3	TRINITY_DN14763_c0_g3_i1	GO:0003677(DNA binding);GO:0003700(DNA binding transcription factor activity);GO:0005515(protein binding);GO:0005634(nucleus);GO:0006351(transcription, DNA-templated);GO:0006355(regulation of transcription, DNA-templated);GO:0009637(response to blue light);GO:0040008(regulation of growth);GO:0046983(protein dimerization activity)	1.02075	up	yes
TRINITY_DN15420_c0_g4	TRINITY_DN15420_c0_g4_i1	GO:0005634(nucleus);GO:0005739(mitochondrion);GO:0015035(protein disulfide oxidoreductase activity);GO:0016971(flavin-linked sulfhydryl oxidase activity);GO:0016972(thiol oxidase activity);GO:0042802(identical protein binding);GO:0050660(flavin adenine dinucleotide binding);GO:0055114(oxidation-reduction process)	1.02058	up	yes
TRINITY_DN10827_c0_g3	TRINITY_DN10827_c0_g3_i1	GO:0004190(aspartic-type endopeptidase activity);GO:0006508(proteolysis);GO:0030163(protein catabolic process)	1.02016	up	yes
TRINITY_DN11996_c0_g6	TRINITY_DN11996_c0_g6_i1	GO:0003756(protein disulfide isomerase activity);GO:0005783(endoplasmic reticulum);GO:0006457(protein folding);GO:0034976(response to endoplasmic reticulum stress)	1.01888	up	yes
TRINITY_DN12199_c0_g2	TRINITY_DN12199_c0_g2_i1;TRINITY_DN12199_c0_g2_i2;TRINITY_DN12199_c0_g2_i3;TRINITY_DN12199_c0_g2_i4;TRINITY_DN12199_c0_g2_i5;TRINITY_DN12199_c0_g2_i6;TRINITY_DN12199_c0_g2_i7	GO:0004565(beta-galactosidase activity);GO:0005618(cell wall);GO:0005773(vacuole)	1.0178	up	yes
TRINITY_DN13443_c0_g4	TRINITY_DN13443_c0_g4_i1;TRINITY_DN13443_c0_g4_i2	GO:0001158(enhancer sequence-specific DNA binding);GO:0003700(DNA binding transcription factor activity);GO:0005516(calmodulin binding);GO:0005634(nucleus);GO:0006351(transcription, DNA-templated);GO:0006355(regulation of transcription, DNA-templated);GO:0045893(positive regulation of transcription, DNA-templated)	1.01751	up	yes
TRINITY_DN12325_c0_g4	TRINITY_DN12325_c0_g4_i1	GO:0003735(structural constituent of ribosome);GO:0005762(mitochondrial large ribosomal subunit);GO:0019843(rRNA binding);GO:0032543(mitochondrial translation)	1.01644	up	yes
TRINITY_DN11440_c0_g1	TRINITY_DN11440_c0_g1_i1;TRINITY_DN11440_c0_g1_i2;TRINITY_DN11440_c0_g1_i3;TRINITY_DN11440_c0_g1_i4;TRINITY_DN11440_c0_g1_i5;TRINITY_DN11440_c0_g1_i6	GO:0005634(nucleus);GO:0006869(lipid transport);GO:0008142(oxysterol binding);GO:0008202(steroid metabolic process);GO:0008289(lipid binding)	1.01638	up	yes
TRINITY_DN13585_c0_g3	TRINITY_DN13585_c0_g3_i1;TRINITY_DN13585_c0_g3_i2;TRINITY_DN13585_c0_g3_i3;TRINITY_DN13585_c0_g3_i4	GO:0004096(catalase activity);GO:0005737(cytoplasm);GO:0020037(heme binding);GO:0042542(response to hydrogen peroxide);GO:0042744(hydrogen peroxide catabolic process)	1.01374	up	yes
TRINITY_DN13044_c0_g4	TRINITY_DN13044_c0_g4_i1	GO:0009717(isoflavonoid biosynthetic process);GO:0033987(2-hydroxyisoflavanone dehydratase activity);GO:0046287(isoflavonoid metabolic process);GO:0052689(carboxylic ester hydrolase activity)	1.01349	up	yes
TRINITY_DN10397_c0_g1	TRINITY_DN10397_c0_g1_i1;TRINITY_DN10397_c0_g1_i2;TRINITY_DN10397_c0_g1_i3	GO:0008097(5S rRNA binding)	1.01133	up	yes
TRINITY_DN14011_c0_g4	TRINITY_DN14011_c0_g4_i1;TRINITY_DN14011_c0_g4_i2	-	1.01109	up	yes
TRINITY_DN15440_c1_g1	TRINITY_DN15440_c1_g1_i1;TRINITY_DN15440_c1_g1_i10;TRINITY_DN15440_c1_g1_i11;TRINITY_DN15440_c1_g1_i12;TRINITY_DN15440_c1_g1_i13;TRINITY_DN15440_c1_g1_i14;TRINITY_DN15440_c1_g1_i2;TRINITY_DN15440_c1_g1_i3;TRINITY_DN15440_c1_g1_i4;TRINITY_DN15440_c1_g1_i5;TRINITY_DN15440_c1_g1_i6;TRINITY_DN15440_c1_g1_i7;TRINITY_DN15440_c1_g1_i8;TRINITY_DN15440_c1_g1_i9	GO:0000226(microtubule cytoskeleton organization);GO:0003924(GTPase activity);GO:0005200(structural constituent of cytoskeleton);GO:0005515(protein binding);GO:0005525(GTP binding);GO:0005618(cell wall);GO:0005730(nucleolus);GO:0005737(cytoplasm);GO:0005773(vacuole);GO:0005829(cytosol);GO:0005874(microtubule);GO:0005886(plasma membrane);GO:0007017(microtubule-based process);GO:0009506(plasmodesma…	1.00972	up	yes
TRINITY_DN11904_c0_g1	TRINITY_DN11904_c0_g1_i1	GO:0005576(extracellular region);GO:0016042(lipid catabolic process);GO:0016787(hydrolase activity);GO:0048046(apoplast);GO:0052689(carboxylic ester hydrolase activity)	1.00779	up	yes
TRINITY_DN13263_c0_g3	TRINITY_DN13263_c0_g3_i1	GO:0004672(protein kinase activity);GO:0004674(protein serine/threonine kinase activity);GO:0005524(ATP binding);GO:0005886(plasma membrane);GO:0006468(protein phosphorylation);GO:0009755(hormone-mediated signaling pathway);GO:0016021(integral component of membrane);GO:0016301(kinase activity);GO:0042803(protein homodimerization activity)	1.00755	up	yes
TRINITY_DN15373_c0_g3	TRINITY_DN15373_c0_g3_i1	GO:0003677(DNA binding);GO:0003700(DNA binding transcription factor activity);GO:0005515(protein binding);GO:0005634(nucleus);GO:0006351(transcription, DNA-templated);GO:0009269(response to desiccation);GO:0009611(response to wounding);GO:0009737(response to abscisic acid);GO:0009738(abscisic acid-activated signaling pathway);GO:0009753(response to jasmonic acid);GO:0009867(jasmonic acid mediated…	1.00675	up	yes
TRINITY_DN15376_c0_g3	TRINITY_DN15376_c0_g3_i1;TRINITY_DN15376_c0_g3_i2	GO:0016021(integral component of membrane);GO:0042626(ATPase activity, coupled to transmembrane movement of substances);GO:0055085(transmembrane transport)	1.0061	up	yes
TRINITY_DN16116_c0_g1	TRINITY_DN16116_c0_g1_i1;TRINITY_DN16116_c0_g1_i2	GO:0004864(protein phosphatase inhibitor activity);GO:0005634(nucleus);GO:0005737(cytoplasm);GO:0009738(abscisic acid-activated signaling pathway);GO:0010427(abscisic acid binding);GO:0080163(regulation of protein serine/threonine phosphatase activity)	1.00596	up	yes
TRINITY_DN9777_c0_g1	TRINITY_DN9777_c0_g1_i1	GO:0005794(Golgi apparatus);GO:0016413(O-acetyltransferase activity);GO:0071554(cell wall organization or biogenesis)	1.00566	up	yes
TRINITY_DN12209_c0_g2	TRINITY_DN12209_c0_g2_i1;TRINITY_DN12209_c0_g2_i2;TRINITY_DN12209_c0_g2_i3	GO:0005783(endoplasmic reticulum);GO:0005886(plasma membrane)	1.00178	up	yes
TRINITY_DN16426_c0_g1	TRINITY_DN16426_c0_g1_i1	GO:0003674(molecular_function);GO:0005634(nucleus);GO:0008150(biological_process)	1.00173	up	yes
TRINITY_DN14721_c1_g3	TRINITY_DN14721_c1_g3_i1	GO:0009536(plastid)	1.00084	up	yes
TRINITY_DN14453_c0_g2	TRINITY_DN14453_c0_g2_i1;TRINITY_DN14453_c0_g2_i2	GO:0004842(ubiquitin-protein transferase activity);GO:0005634(nucleus);GO:0006511(ubiquitin-dependent protein catabolic process)	-1.0008	down	yes
TRINITY_DN12369_c1_g1	TRINITY_DN12369_c1_g1_i1	GO:0016021(integral component of membrane);GO:0042626(ATPase activity, coupled to transmembrane movement of substances);GO:0055085(transmembrane transport)	-1.001	down	yes
TRINITY_DN10980_c0_g3	TRINITY_DN10980_c0_g3_i1	GO:0004004(ATP-dependent RNA helicase activity);GO:0010501(RNA secondary structure unwinding)	-1.0012	down	yes
TRINITY_DN11261_c1_g11	TRINITY_DN11261_c1_g11_i1;TRINITY_DN11261_c1_g11_i2	GO:0008150(biological_process);GO:0009507(chloroplast);GO:0009535(chloroplast thylakoid membrane);GO:0016021(integral component of membrane)	-1.01126	down	yes
TRINITY_DN10405_c0_g6	TRINITY_DN10405_c0_g6_i1	GO:0004748(ribonucleoside-diphosphate reductase activity, thioredoxin disulfide as acceptor);GO:0005971(ribonucleoside-diphosphate reductase complex);GO:0009263(deoxyribonucleotide biosynthetic process)	-1.01168	down	yes
TRINITY_DN12208_c1_g1	TRINITY_DN12208_c1_g1_i1	GO:0006629(lipid metabolic process);GO:0016021(integral component of membrane);GO:0016746(transferase activity, transferring acyl groups);GO:0047196(long-chain-alcohol O-fatty-acyltransferase activity);GO:0102966(arachidoyl-CoA:1-dodecanol O-acyltransferase activity);GO:0103095(wax ester synthase activity)	-1.01249	down	yes
TRINITY_DN10807_c0_g3	TRINITY_DN10807_c0_g3_i1;TRINITY_DN10807_c0_g3_i2	GO:0004066(asparagine synthase (glutamine-hydrolyzing) activity);GO:0005829(cytosol);GO:0006529(asparagine biosynthetic process);GO:0006541(glutamine metabolic process);GO:0042803(protein homodimerization activity)	-1.01544	down	yes
TRINITY_DN9698_c0_g1	TRINITY_DN9698_c0_g1_i1;TRINITY_DN9698_c0_g1_i2	-	-1.01564	down	yes
TRINITY_DN13466_c0_g6	TRINITY_DN13466_c0_g6_i1	GO:0005515(protein binding);GO:0005737(cytoplasm);GO:0005739(mitochondrion);GO:0006979(response to oxidative stress);GO:0009751(response to salicylic acid);GO:0009816(defense response to bacterium, incompatible interaction);GO:0019441(tryptophan catabolic process to kynurenine);GO:0020037(heme binding);GO:0046872(metal ion binding)	-1.017	down	yes
TRINITY_DN13533_c1_g5	TRINITY_DN13533_c1_g5_i1;TRINITY_DN13533_c1_g5_i2	GO:0003677(DNA binding);GO:0003700(DNA binding transcription factor activity);GO:0005515(protein binding);GO:0005634(nucleus);GO:0006351(transcription, DNA-templated);GO:0006355(regulation of transcription, DNA-templated);GO:0007165(signal transduction);GO:0010067(procambium histogenesis);GO:0010087(phloem or xylem histogenesis);GO:0051301(cell division)	-1.0171	down	yes
TRINITY_DN14585_c0_g1	TRINITY_DN14585_c0_g1_i1;TRINITY_DN14585_c0_g1_i2;TRINITY_DN14585_c0_g1_i3;TRINITY_DN14585_c0_g1_i4;TRINITY_DN14585_c0_g1_i5	GO:0003674(molecular_function);GO:0005634(nucleus);GO:0008150(biological_process)	-1.01744	down	yes
TRINITY_DN11910_c0_g10	TRINITY_DN11910_c0_g10_i1	GO:0008422(beta-glucosidase activity);GO:0009651(response to salt stress);GO:0009725(response to hormone);GO:0019762(glucosinolate catabolic process)	-1.01839	down	yes
TRINITY_DN12616_c0_g1	TRINITY_DN12616_c0_g1_i1	GO:0003755(peptidyl-prolyl cis-trans isomerase activity)	-1.0199	down	yes
TRINITY_DN15799_c0_g1	TRINITY_DN15799_c0_g1_i1;TRINITY_DN15799_c0_g1_i2;TRINITY_DN15799_c0_g1_i3;TRINITY_DN15799_c0_g1_i4;TRINITY_DN15799_c0_g1_i5	GO:0003677(DNA binding);GO:0003700(DNA binding transcription factor activity);GO:0005634(nucleus);GO:0006351(transcription, DNA-templated);GO:0006355(regulation of transcription, DNA-templated);GO:0046983(protein dimerization activity);GO:2000488(positive regulation of brassinosteroid biosynthetic process)	-1.02133	down	yes
TRINITY_DN13237_c0_g5	TRINITY_DN13237_c0_g5_i1	GO:0045431(flavonol synthase activity)	-1.02197	down	yes
TRINITY_DN11954_c2_g2	TRINITY_DN11954_c2_g2_i1;TRINITY_DN11954_c2_g2_i2;TRINITY_DN11954_c2_g2_i3;TRINITY_DN11954_c2_g2_i4	-	-1.02207	down	yes
TRINITY_DN10570_c0_g1	TRINITY_DN10570_c0_g1_i1	GO:0005737(cytoplasm);GO:0016740(transferase activity);GO:0016747(transferase activity, transferring acyl groups other than amino-acyl groups)	-1.02351	down	yes
TRINITY_DN12512_c2_g2	TRINITY_DN12512_c2_g2_i1;TRINITY_DN12512_c2_g2_i2	GO:0003674(molecular_function);GO:0005634(nucleus);GO:0008150(biological_process)	-1.03245	down	yes
TRINITY_DN14244_c0_g5	TRINITY_DN14244_c0_g5_i1	GO:0004197(cysteine-type endopeptidase activity);GO:0005515(protein binding);GO:0006508(proteolysis);GO:0006952(defense response);GO:0043068(positive regulation of programmed cell death)	-1.03287	down	yes
TRINITY_DN11894_c0_g6	TRINITY_DN11894_c0_g6_i1;TRINITY_DN11894_c0_g6_i2	-	-1.03816	down	yes
TRINITY_DN16494_c0_g1	TRINITY_DN16494_c0_g1_i1;TRINITY_DN16494_c0_g1_i2;TRINITY_DN16494_c0_g1_i3;TRINITY_DN16494_c0_g1_i4;TRINITY_DN16494_c0_g1_i5;TRINITY_DN16494_c0_g1_i6;TRINITY_DN16494_c0_g1_i7;TRINITY_DN16494_c0_g1_i8;TRINITY_DN16494_c0_g1_i9	GO:0000719(photoreactive repair);GO:0003904(deoxyribodipyrimidine photo-lyase activity)	-1.04153	down	yes
TRINITY_DN12206_c1_g6	TRINITY_DN12206_c1_g6_i1;TRINITY_DN12206_c1_g6_i2	GO:0005737(cytoplasm)	-1.04168	down	yes
TRINITY_DN14702_c0_g2	TRINITY_DN14702_c0_g2_i1;TRINITY_DN14702_c0_g2_i2;TRINITY_DN14702_c0_g2_i3;TRINITY_DN14702_c0_g2_i4;TRINITY_DN14702_c0_g2_i5;TRINITY_DN14702_c0_g2_i6;TRINITY_DN14702_c0_g2_i7	GO:0004350(glutamate-5-semialdehyde dehydrogenase activity);GO:0005737(cytoplasm);GO:0006561(proline biosynthetic process)	-1.04176	down	yes
TRINITY_DN13681_c0_g5	TRINITY_DN13681_c0_g5_i1;TRINITY_DN13681_c0_g5_i2;TRINITY_DN13681_c0_g5_i3	GO:0005739(mitochondrion);GO:0008150(biological_process)	-1.04194	down	yes
TRINITY_DN11569_c1_g1	TRINITY_DN11569_c1_g1_i1;TRINITY_DN11569_c1_g1_i2	GO:0005634(nucleus);GO:0006457(protein folding);GO:0009416(response to light stimulus);GO:0009507(chloroplast);GO:0009570(chloroplast stroma)	-1.04213	down	yes
TRINITY_DN12535_c0_g1	TRINITY_DN12535_c0_g1_i1	GO:0004497(monooxygenase activity);GO:0044550(secondary metabolite biosynthetic process)	-1.04216	down	yes
TRINITY_DN12239_c0_g1	TRINITY_DN12239_c0_g1_i1	GO:0005634(nucleus);GO:0005737(cytoplasm)	-1.04258	down	yes
TRINITY_DN13816_c0_g6	TRINITY_DN13816_c0_g6_i1;TRINITY_DN13816_c0_g6_i2;TRINITY_DN13816_c0_g6_i3;TRINITY_DN13816_c0_g6_i4;TRINITY_DN13816_c0_g6_i5;TRINITY_DN13816_c0_g6_i6;TRINITY_DN13816_c0_g6_i7;TRINITY_DN13816_c0_g6_i8	-	-1.04303	down	yes
TRINITY_DN14132_c0_g1	TRINITY_DN14132_c0_g1_i1;TRINITY_DN14132_c0_g1_i2	GO:0005509(calcium ion binding)	-1.04322	down	yes
TRINITY_DN15601_c0_g5	TRINITY_DN15601_c0_g5_i1	GO:0016787(hydrolase activity)	-1.04352	down	yes
TRINITY_DN12174_c0_g3	TRINITY_DN12174_c0_g3_i1	GO:0004527(exonuclease activity);GO:0005634(nucleus);GO:0008150(biological_process);GO:0016021(integral component of membrane)	-1.04352	down	yes
TRINITY_DN14778_c0_g4	TRINITY_DN14778_c0_g4_i1;TRINITY_DN14778_c0_g4_i2	GO:0003674(molecular_function);GO:0005739(mitochondrion);GO:0008150(biological_process);GO:0009507(chloroplast)	-1.04352	down	yes
TRINITY_DN10865_c0_g5	TRINITY_DN10865_c0_g5_i1;TRINITY_DN10865_c0_g5_i2	GO:0005576(extracellular region);GO:0006952(defense response);GO:0031640(killing of cells of other organism);GO:0050832(defense response to fungus)	-1.04443	down	yes
TRINITY_DN6354_c0_g1	TRINITY_DN6354_c0_g1_i1;TRINITY_DN6354_c0_g1_i2	GO:0000977(RNA polymerase II regulatory region sequence-specific DNA binding);GO:0001085(RNA polymerase II transcription factor binding);GO:0001228(transcriptional activator activity, RNA polymerase II transcription regulatory region sequence-specific DNA binding);GO:0003682(chromatin binding);GO:0005634(nucleus);GO:0005667(transcription factor complex);GO:0030154(cell differentiation)	-1.04467	down	yes
TRINITY_DN10991_c0_g4	TRINITY_DN10991_c0_g4_i1;TRINITY_DN10991_c0_g4_i2	GO:0005739(mitochondrion)	-1.04875	down	yes
TRINITY_DN11148_c0_g2	TRINITY_DN11148_c0_g2_i1	GO:0003674(molecular_function);GO:0005739(mitochondrion);GO:0008150(biological_process);GO:0016021(integral component of membrane)	-1.04963	down	yes
TRINITY_DN15944_c0_g7	TRINITY_DN15944_c0_g7_i1;TRINITY_DN15944_c0_g7_i2	GO:0005737(cytoplasm);GO:0030001(metal ion transport);GO:0046914(transition metal ion binding);GO:0046916(cellular transition metal ion homeostasis)	-1.04963	down	yes
TRINITY_DN15860_c1_g7	TRINITY_DN15860_c1_g7_i1	GO:0004674(protein serine/threonine kinase activity);GO:0005515(protein binding);GO:0005524(ATP binding);GO:0005634(nucleus);GO:0005773(vacuole);GO:0005886(plasma membrane);GO:0009506(plasmodesma);GO:0016301(kinase activity);GO:0018105(peptidyl-serine phosphorylation);GO:0018107(peptidyl-threonine phosphorylation);GO:0035556(intracellular signal transduction)	-1.0499	down	yes
TRINITY_DN9908_c0_g1	TRINITY_DN9908_c0_g1_i1	GO:0003865(3-oxo-5-alpha-steroid 4-dehydrogenase activity);GO:0006629(lipid metabolic process);GO:0009507(chloroplast);GO:0009941(chloroplast envelope);GO:0016021(integral component of membrane);GO:0016627(oxidoreductase activity, acting on the CH-CH group of donors)	-1.05105	down	yes
TRINITY_DN12565_c0_g12	TRINITY_DN12565_c0_g12_i1	GO:0005215(transporter activity);GO:0005886(plasma membrane);GO:0006857(oligopeptide transport);GO:0009624(response to nematode);GO:0015333(peptide:proton symporter activity);GO:0016020(membrane);GO:0016021(integral component of membrane);GO:0022857(transmembrane transporter activity);GO:0055085(transmembrane transport)	-1.05137	down	yes
TRINITY_DN16120_c0_g10	TRINITY_DN16120_c0_g10_i1	GO:0005576(extracellular region);GO:0006869(lipid transport);GO:0008289(lipid binding);GO:0009506(plasmodesma)	-1.05861	down	yes
TRINITY_DN11762_c0_g4	TRINITY_DN11762_c0_g4_i1;TRINITY_DN11762_c0_g4_i2	GO:0004805(trehalose-phosphatase activity);GO:0005634(nucleus);GO:0005992(trehalose biosynthetic process)	-1.0599	down	yes
TRINITY_DN16571_c1_g6	TRINITY_DN16571_c1_g6_i1	-	-1.06402	down	yes
TRINITY_DN10803_c1_g2	TRINITY_DN10803_c1_g2_i1;TRINITY_DN10803_c1_g2_i2;TRINITY_DN10803_c1_g2_i3	GO:0004350(glutamate-5-semialdehyde dehydrogenase activity);GO:0005737(cytoplasm);GO:0006561(proline biosynthetic process)	-1.06482	down	yes
TRINITY_DN11042_c0_g6	TRINITY_DN11042_c0_g6_i1	GO:0005783(endoplasmic reticulum);GO:0010105(negative regulation of ethylene-activated signaling pathway)	-1.06502	down	yes
TRINITY_DN12558_c0_g2	TRINITY_DN12558_c0_g2_i1	GO:0003674(molecular_function);GO:0005576(extracellular region);GO:0005618(cell wall);GO:0008150(biological_process);GO:0009505(plant-type cell wall)	-1.06505	down	yes
TRINITY_DN13722_c0_g2	TRINITY_DN13722_c0_g2_i1;TRINITY_DN13722_c0_g2_i2	GO:0004679(AMP-activated protein kinase activity);GO:0005515(protein binding);GO:0005524(ATP binding);GO:0005737(cytoplasm);GO:0005975(carbohydrate metabolic process);GO:0006633(fatty acid biosynthetic process);GO:0016301(kinase activity);GO:0016310(phosphorylation);GO:0019887(protein kinase regulator activity);GO:0042128(nitrate assimilation);GO:0043562(cellular response to nitrogen levels)	-1.06573	down	yes
TRINITY_DN15402_c0_g4	TRINITY_DN15402_c0_g4_i1	GO:0003700(DNA binding transcription factor activity);GO:0005515(protein binding);GO:0005634(nucleus);GO:0006351(transcription, DNA-templated);GO:0006355(regulation of transcription, DNA-templated);GO:0043565(sequence-specific DNA binding);GO:0046982(protein heterodimerization activity)	-1.06634	down	yes
TRINITY_DN11344_c0_g2	TRINITY_DN11344_c0_g2_i1	-	-1.06705	down	yes
TRINITY_DN13071_c0_g1	TRINITY_DN13071_c0_g1_i1	GO:0003674(molecular_function);GO:0005634(nucleus);GO:0010224(response to UV-B)	-1.06705	down	yes
TRINITY_DN16059_c0_g1	TRINITY_DN16059_c0_g1_i1;TRINITY_DN16059_c0_g1_i2;TRINITY_DN16059_c0_g1_i3;TRINITY_DN16059_c0_g1_i4;TRINITY_DN16059_c0_g1_i5	GO:0005737(cytoplasm);GO:0006898(receptor-mediated endocytosis);GO:0007015(actin filament organization);GO:0009507(chloroplast);GO:0009903(chloroplast avoidance movement);GO:0009904(chloroplast accumulation movement);GO:0030276(clathrin binding);GO:0031982(vesicle);GO:0071483(cellular response to blue light);GO:0072318(clathrin coat disassembly)	-1.0672	down	yes
TRINITY_DN12950_c1_g3	TRINITY_DN12950_c1_g3_i1;TRINITY_DN12950_c1_g3_i2;TRINITY_DN12950_c1_g3_i3	GO:0005634(nucleus);GO:0005737(cytoplasm);GO:0005886(plasma membrane);GO:0007165(signal transduction);GO:0009638(phototropism);GO:0016567(protein ubiquitination)	-1.06759	down	yes
TRINITY_DN13408_c0_g4	TRINITY_DN13408_c0_g4_i1;TRINITY_DN13408_c0_g4_i2	-	-1.06768	down	yes
TRINITY_DN11143_c0_g6	TRINITY_DN11143_c0_g6_i1	GO:0016021(integral component of membrane);GO:0042626(ATPase activity, coupled to transmembrane movement of substances);GO:0055085(transmembrane transport)	-1.06776	down	yes
TRINITY_DN10818_c0_g1	TRINITY_DN10818_c0_g1_i1;TRINITY_DN10818_c0_g1_i2;TRINITY_DN10818_c0_g1_i3	GO:0004365(glyceraldehyde-3-phosphate dehydrogenase (NAD+) (phosphorylating) activity);GO:0005829(cytosol);GO:0006006(glucose metabolic process);GO:0006096(glycolytic process);GO:0009409(response to cold);GO:0009416(response to light stimulus);GO:0009507(chloroplast);GO:0009535(chloroplast thylakoid membrane);GO:0009570(chloroplast stroma);GO:0009744(response to sucrose);GO:0009941(chloroplast en…	-1.06777	down	yes
TRINITY_DN11492_c0_g1	TRINITY_DN11492_c0_g1_i1	GO:0003700(DNA binding transcription factor activity);GO:0005515(protein binding);GO:0005634(nucleus);GO:0005886(plasma membrane);GO:0006355(regulation of transcription, DNA-templated);GO:0010629(negative regulation of gene expression);GO:1900037(regulation of cellular response to hypoxia)	-1.06782	down	yes
TRINITY_DN10534_c0_g6	TRINITY_DN10534_c0_g6_i1	GO:0005737(cytoplasm);GO:0005773(vacuole);GO:0005774(vacuolar membrane);GO:0005794(Golgi apparatus);GO:0005886(plasma membrane);GO:0009414(response to water deprivation);GO:0009506(plasmodesma);GO:0016118(carotenoid catabolic process);GO:0016121(carotene catabolic process);GO:0016124(xanthophyll catabolic process);GO:0045549(9-cis-epoxycarotenoid dioxygenase activity);GO:0046872(metal ion binding…	-1.06951	down	yes
TRINITY_DN13087_c0_g3	TRINITY_DN13087_c0_g3_i1;TRINITY_DN13087_c0_g3_i2	GO:0001561(fatty acid alpha-oxidation);GO:0004601(peroxidase activity);GO:0005576(extracellular region);GO:0006629(lipid metabolic process);GO:0006979(response to oxidative stress);GO:0008219(cell death);GO:0009626(plant-type hypersensitive response);GO:0009627(systemic acquired resistance);GO:0009737(response to abscisic acid);GO:0009751(response to salicylic acid);GO:0012511(monolayer-surrounde…	-1.06972	down	yes
TRINITY_DN13878_c0_g4	TRINITY_DN13878_c0_g4_i1;TRINITY_DN13878_c0_g4_i2	GO:0003700(DNA binding transcription factor activity);GO:0005515(protein binding);GO:0005634(nucleus);GO:0006355(regulation of transcription, DNA-templated);GO:0008270(zinc ion binding);GO:0016020(membrane)	-1.07266	down	yes
TRINITY_DN11055_c0_g3	TRINITY_DN11055_c0_g3_i1;TRINITY_DN11055_c0_g3_i2	GO:0003677(DNA binding);GO:0003700(DNA binding transcription factor activity);GO:0005634(nucleus);GO:0005992(trehalose biosynthetic process);GO:0006351(transcription, DNA-templated);GO:0006355(regulation of transcription, DNA-templated);GO:0006561(proline biosynthetic process);GO:0007275(multicellular organism development);GO:0009718(anthocyanin-containing compound biosynthetic process);GO:001012…	-1.07354	down	yes
TRINITY_DN14525_c0_g1	TRINITY_DN14525_c0_g1_i1;TRINITY_DN14525_c0_g1_i2	GO:0005576(extracellular region);GO:0051707(response to other organism)	-1.07437	down	yes
TRINITY_DN9819_c0_g1	TRINITY_DN9819_c0_g1_i1;TRINITY_DN9819_c0_g1_i2	-	-1.0763	down	yes
TRINITY_DN11642_c0_g4	TRINITY_DN11642_c0_g4_i1	GO:0003677(DNA binding);GO:0003700(DNA binding transcription factor activity);GO:0005622(intracellular);GO:0005634(nucleus);GO:0006351(transcription, DNA-templated);GO:0006355(regulation of transcription, DNA-templated);GO:0009873(ethylene-activated signaling pathway)	-1.07714	down	yes
TRINITY_DN15323_c0_g3	TRINITY_DN15323_c0_g3_i1;TRINITY_DN15323_c0_g3_i2	GO:0000987(proximal promoter sequence-specific DNA binding);GO:0003677(DNA binding);GO:0003700(DNA binding transcription factor activity);GO:0005515(protein binding);GO:0005634(nucleus);GO:0006351(transcription, DNA-templated);GO:0006355(regulation of transcription, DNA-templated);GO:0008361(regulation of cell size);GO:0009653(anatomical structure morphogenesis);GO:0043565(sequence-specific DNA b…	-1.07773	down	yes
TRINITY_DN16602_c2_g6	TRINITY_DN16602_c2_g6_i1	GO:0005737(cytoplasm);GO:0006952(defense response);GO:0007165(signal transduction);GO:0043531(ADP binding)	-1.07822	down	yes
TRINITY_DN12906_c0_g3	TRINITY_DN12906_c0_g3_i1;TRINITY_DN12906_c0_g3_i2;TRINITY_DN12906_c0_g3_i3;TRINITY_DN12906_c0_g3_i4;TRINITY_DN12906_c0_g3_i5;TRINITY_DN12906_c0_g3_i6	-	-1.08103	down	yes
TRINITY_DN13885_c0_g1	TRINITY_DN13885_c0_g1_i1;TRINITY_DN13885_c0_g1_i10;TRINITY_DN13885_c0_g1_i2;TRINITY_DN13885_c0_g1_i3;TRINITY_DN13885_c0_g1_i4;TRINITY_DN13885_c0_g1_i5;TRINITY_DN13885_c0_g1_i6;TRINITY_DN13885_c0_g1_i7;TRINITY_DN13885_c0_g1_i8;TRINITY_DN13885_c0_g1_i9	GO:0005737(cytoplasm);GO:0005829(cytosol);GO:0008270(zinc ion binding);GO:0009809(lignin biosynthetic process);GO:0016491(oxidoreductase activity);GO:0045551(cinnamyl-alcohol dehydrogenase activity);GO:0052747(sinapyl alcohol dehydrogenase activity);GO:0055114(oxidation-reduction process)	-1.08396	down	yes
TRINITY_DN10627_c1_g4	TRINITY_DN10627_c1_g4_i1	GO:0003743(translation initiation factor activity);GO:0003746(translation elongation factor activity);GO:0005737(cytoplasm);GO:0006413(translational initiation);GO:0006452(translational frameshifting);GO:0010089(xylem development);GO:0043022(ribosome binding);GO:0045901(positive regulation of translational elongation);GO:0045905(positive regulation of translational termination)	-1.08449	down	yes
TRINITY_DN12953_c0_g4	TRINITY_DN12953_c0_g4_i1	GO:0016020(membrane);GO:0016709(oxidoreductase activity, acting on paired donors, with incorporation or reduction of molecular oxygen, NAD(P)H as one donor, and incorporation of one atom of oxygen);GO:0044550(secondary metabolite biosynthetic process)	-1.08483	down	yes
TRINITY_DN10817_c3_g3	TRINITY_DN10817_c3_g3_i1;TRINITY_DN10817_c3_g3_i2;TRINITY_DN10817_c3_g3_i3	GO:0000139(Golgi membrane);GO:0000271(polysaccharide biosynthetic process);GO:0000977(RNA polymerase II regulatory region sequence-specific DNA binding);GO:0005794(Golgi apparatus);GO:0005886(plasma membrane);GO:0009833(plant-type primary cell wall biogenesis);GO:0016021(integral component of membrane);GO:0016740(transferase activity);GO:0016757(transferase activity, transferring glycosyl groups)…	-1.08657	down	yes
TRINITY_DN13765_c0_g1	TRINITY_DN13765_c0_g1_i1	GO:0005634(nucleus);GO:0005773(vacuole);GO:0006950(response to stress);GO:0016787(hydrolase activity)	-1.09072	down	yes
TRINITY_DN9929_c0_g1	TRINITY_DN9929_c0_g1_i1	GO:0003677(DNA binding);GO:0003700(DNA binding transcription factor activity);GO:0005634(nucleus);GO:0006351(transcription, DNA-templated);GO:0006355(regulation of transcription, DNA-templated);GO:0043565(sequence-specific DNA binding);GO:0044212(transcription regulatory region DNA binding);GO:0046872(metal ion binding)	-1.09396	down	yes
TRINITY_DN12822_c1_g9	TRINITY_DN12822_c1_g9_i1	GO:0003333(amino acid transmembrane transport);GO:0005886(plasma membrane);GO:0015171(amino acid transmembrane transporter activity)	-1.09607	down	yes
TRINITY_DN12707_c2_g2	TRINITY_DN12707_c2_g2_i1;TRINITY_DN12707_c2_g2_i2;TRINITY_DN12707_c2_g2_i3;TRINITY_DN12707_c2_g2_i4;TRINITY_DN12707_c2_g2_i5;TRINITY_DN12707_c2_g2_i6;TRINITY_DN12707_c2_g2_i7;TRINITY_DN12707_c2_g2_i8	-	-1.0971	down	yes
TRINITY_DN14934_c0_g3	TRINITY_DN14934_c0_g3_i1;TRINITY_DN14934_c0_g3_i2;TRINITY_DN14934_c0_g3_i3;TRINITY_DN14934_c0_g3_i4;TRINITY_DN14934_c0_g3_i5	GO:0003682(chromatin binding);GO:0003700(DNA binding transcription factor activity);GO:0003713(transcription coactivator activity);GO:0004402(histone acetyltransferase activity);GO:0005634(nucleus);GO:0006338(chromatin remodeling);GO:0006357(regulation of transcription by RNA polymerase II);GO:0035066(positive regulation of histone acetylation)	-1.09739	down	yes
TRINITY_DN15830_c0_g3	TRINITY_DN15830_c0_g3_i1;TRINITY_DN15830_c0_g3_i2;TRINITY_DN15830_c0_g3_i3;TRINITY_DN15830_c0_g3_i4;TRINITY_DN15830_c0_g3_i5;TRINITY_DN15830_c0_g3_i6;TRINITY_DN15830_c0_g3_i7;TRINITY_DN15830_c0_g3_i8	GO:0004089(carbonate dehydratase activity);GO:0005886(plasma membrane);GO:0008270(zinc ion binding);GO:0009409(response to cold);GO:0009507(chloroplast);GO:0009535(chloroplast thylakoid membrane);GO:0009570(chloroplast stroma);GO:0009579(thylakoid);GO:0009817(defense response to fungus, incompatible interaction);GO:0009941(chloroplast envelope);GO:0010037(response to carbon dioxide);GO:0010119(re…	-1.09762	down	yes
TRINITY_DN11223_c0_g1	TRINITY_DN11223_c0_g1_i1;TRINITY_DN11223_c0_g1_i10;TRINITY_DN11223_c0_g1_i11;TRINITY_DN11223_c0_g1_i12;TRINITY_DN11223_c0_g1_i13;TRINITY_DN11223_c0_g1_i14;TRINITY_DN11223_c0_g1_i15;TRINITY_DN11223_c0_g1_i16;TRINITY_DN11223_c0_g1_i17;TRINITY_DN11223_c0_g1_i18;TRINITY_DN11223_c0_g1_i2;TRINITY_DN11223_c0_g1_i3;TRINITY_DN11223_c0_g1_i4;TRINITY_DN11223_c0_g1_i5;TRINITY_DN11223_c0_g1_i6;TRINITY_DN11223…	GO:0010334(sesquiterpene synthase activity);GO:0033383(geranyl diphosphate metabolic process)	-1.10042	down	yes
TRINITY_DN10961_c1_g1	TRINITY_DN10961_c1_g1_i1;TRINITY_DN10961_c1_g1_i2;TRINITY_DN10961_c1_g1_i3;TRINITY_DN10961_c1_g1_i4;TRINITY_DN10961_c1_g1_i5;TRINITY_DN10961_c1_g1_i6;TRINITY_DN10961_c1_g1_i7;TRINITY_DN10961_c1_g1_i8;TRINITY_DN10961_c1_g1_i9	GO:0005506(iron ion binding);GO:0009507(chloroplast);GO:0009535(chloroplast thylakoid membrane);GO:0009706(chloroplast inner membrane);GO:0010277(chlorophyllide a oxygenase [overall] activity);GO:0015995(chlorophyll biosynthetic process);GO:0016705(oxidoreductase activity, acting on paired donors, with incorporation or reduction of molecular oxygen);GO:0042651(thylakoid membrane);GO:0051537(2 iro…	-1.10043	down	yes
TRINITY_DN13951_c0_g5	TRINITY_DN13951_c0_g5_i1	GO:0000302(response to reactive oxygen species);GO:0003674(molecular_function);GO:0009507(chloroplast);GO:0009536(plastid);GO:0009648(photoperiodism);GO:0009793(embryo development ending in seed dormancy);GO:0009941(chloroplast envelope);GO:0016021(integral component of membrane);GO:0031969(chloroplast membrane);GO:0048366(leaf development)	-1.10097	down	yes
TRINITY_DN11924_c0_g2	TRINITY_DN11924_c0_g2_i1;TRINITY_DN11924_c0_g2_i2	-	-1.10158	down	yes
TRINITY_DN12935_c1_g5	TRINITY_DN12935_c1_g5_i1;TRINITY_DN12935_c1_g5_i2	GO:0005515(protein binding);GO:0005737(cytoplasm);GO:0005829(cytosol);GO:0005886(plasma membrane);GO:0006520(cellular amino acid metabolic process);GO:0006979(response to oxidative stress);GO:0006982(response to lipid hydroperoxide);GO:0008615(pyridoxine biosynthetic process);GO:0009651(response to salt stress);GO:0010224(response to UV-B);GO:0010335(response to non-ionic osmotic stress);GO:00125…	-1.10442	down	yes
TRINITY_DN12244_c0_g7	TRINITY_DN12244_c0_g7_i1;TRINITY_DN12244_c0_g7_i2	-	-1.10442	down	yes
TRINITY_DN11297_c1_g3	TRINITY_DN11297_c1_g3_i1;TRINITY_DN11297_c1_g3_i2;TRINITY_DN11297_c1_g3_i3	GO:0004252(serine-type endopeptidase activity);GO:0005618(cell wall)	-1.10567	down	yes
TRINITY_DN11801_c1_g1	TRINITY_DN11801_c1_g1_i1;TRINITY_DN11801_c1_g1_i2;TRINITY_DN11801_c1_g1_i3;TRINITY_DN11801_c1_g1_i4;TRINITY_DN11801_c1_g1_i5;TRINITY_DN11801_c1_g1_i6;TRINITY_DN11801_c1_g1_i7	GO:0006629(lipid metabolic process);GO:0016020(membrane);GO:0016298(lipase activity)	-1.1082	down	yes
TRINITY_DN12992_c0_g5	TRINITY_DN12992_c0_g5_i1	-	-1.10926	down	yes
TRINITY_DN13816_c0_g7	TRINITY_DN13816_c0_g7_i1;TRINITY_DN13816_c0_g7_i2	-	-1.11184	down	yes
TRINITY_DN12942_c0_g3	TRINITY_DN12942_c0_g3_i1;TRINITY_DN12942_c0_g3_i2;TRINITY_DN12942_c0_g3_i3;TRINITY_DN12942_c0_g3_i4;TRINITY_DN12942_c0_g3_i5;TRINITY_DN12942_c0_g3_i6;TRINITY_DN12942_c0_g3_i7;TRINITY_DN12942_c0_g3_i8;TRINITY_DN12942_c0_g3_i9	GO:0004784(superoxide dismutase activity);GO:0005507(copper ion binding);GO:0005515(protein binding);GO:0005737(cytoplasm);GO:0005739(mitochondrion);GO:0005829(cytosol);GO:0005886(plasma membrane);GO:0006979(response to oxidative stress);GO:0007623(circadian rhythm);GO:0009507(chloroplast);GO:0009570(chloroplast stroma);GO:0009579(thylakoid);GO:0009642(response to light intensity);GO:0009941(chlo…	-1.11232	down	yes
TRINITY_DN9394_c0_g1	TRINITY_DN9394_c0_g1_i1;TRINITY_DN9394_c0_g1_i2;TRINITY_DN9394_c0_g1_i3	-	-1.11294	down	yes
TRINITY_DN16531_c1_g1	TRINITY_DN16531_c1_g1_i1;TRINITY_DN16531_c1_g1_i10;TRINITY_DN16531_c1_g1_i11;TRINITY_DN16531_c1_g1_i12;TRINITY_DN16531_c1_g1_i13;TRINITY_DN16531_c1_g1_i14;TRINITY_DN16531_c1_g1_i2;TRINITY_DN16531_c1_g1_i3;TRINITY_DN16531_c1_g1_i4;TRINITY_DN16531_c1_g1_i5;TRINITY_DN16531_c1_g1_i6;TRINITY_DN16531_c1_g1_i7;TRINITY_DN16531_c1_g1_i8;TRINITY_DN16531_c1_g1_i9	-	-1.11651	down	yes
TRINITY_DN16367_c0_g1	TRINITY_DN16367_c0_g1_i1	GO:0003674(molecular_function);GO:0008150(biological_process)	-1.11898	down	yes
TRINITY_DN11041_c0_g2	TRINITY_DN11041_c0_g2_i1;TRINITY_DN11041_c0_g2_i2;TRINITY_DN11041_c0_g2_i3;TRINITY_DN11041_c0_g2_i4;TRINITY_DN11041_c0_g2_i5;TRINITY_DN11041_c0_g2_i6;TRINITY_DN11041_c0_g2_i7;TRINITY_DN11041_c0_g2_i8	GO:0005794(Golgi apparatus);GO:0016413(O-acetyltransferase activity);GO:0071554(cell wall organization or biogenesis)	-1.11986	down	yes
TRINITY_DN13306_c1_g2	TRINITY_DN13306_c1_g2_i1	-	-1.1204	down	yes
TRINITY_DN10556_c0_g1	TRINITY_DN10556_c0_g1_i1;TRINITY_DN10556_c0_g1_i2;TRINITY_DN10556_c0_g1_i3;TRINITY_DN10556_c0_g1_i4;TRINITY_DN10556_c0_g1_i5	-	-1.12093	down	yes
TRINITY_DN12731_c0_g1	TRINITY_DN12731_c0_g1_i1	GO:0004364(glutathione transferase activity);GO:0005737(cytoplasm);GO:0006749(glutathione metabolic process)	-1.1235	down	yes
TRINITY_DN9691_c0_g1	TRINITY_DN9691_c0_g1_i1;TRINITY_DN9691_c0_g1_i2	GO:0003674(molecular_function);GO:0005739(mitochondrion);GO:0008150(biological_process)	-1.12389	down	yes
TRINITY_DN11472_c0_g3	TRINITY_DN11472_c0_g3_i1	GO:0003824(catalytic activity);GO:0005575(cellular_component);GO:0008936(nicotinamidase activity);GO:0019363(pyridine nucleotide biosynthetic process);GO:0019674(NAD metabolic process)	-1.12454	down	yes
TRINITY_DN14686_c0_g7	TRINITY_DN14686_c0_g7_i1	GO:0005737(cytoplasm);GO:0006979(response to oxidative stress);GO:0015031(protein transport)	-1.12663	down	yes
TRINITY_DN13676_c1_g1	TRINITY_DN13676_c1_g1_i1;TRINITY_DN13676_c1_g1_i2	GO:0004722(protein serine/threonine phosphatase activity);GO:0005634(nucleus);GO:0006470(protein dephosphorylation);GO:0046872(metal ion binding)	-1.12761	down	yes
TRINITY_DN15367_c0_g5	TRINITY_DN15367_c0_g5_i1	GO:0004751(ribose-5-phosphate isomerase activity);GO:0005737(cytoplasm);GO:0008219(cell death);GO:0009052(pentose-phosphate shunt, non-oxidative branch);GO:0010228(vegetative to reproductive phase transition of meristem)	-1.12948	down	yes
TRINITY_DN15274_c0_g1	TRINITY_DN15274_c0_g1_i1;TRINITY_DN15274_c0_g1_i2;TRINITY_DN15274_c0_g1_i3;TRINITY_DN15274_c0_g1_i4;TRINITY_DN15274_c0_g1_i5;TRINITY_DN15274_c0_g1_i6;TRINITY_DN15274_c0_g1_i7;TRINITY_DN15274_c0_g1_i8;TRINITY_DN15274_c0_g1_i9	GO:0007275(multicellular organism development);GO:0010268(brassinosteroid homeostasis);GO:0016125(sterol metabolic process);GO:0016132(brassinosteroid biosynthetic process);GO:0016709(oxidoreductase activity, acting on paired donors, with incorporation or reduction of molecular oxygen, NAD(P)H as one donor, and incorporation of one atom of oxygen)	-1.12992	down	yes
TRINITY_DN14913_c1_g1	TRINITY_DN14913_c1_g1_i1;TRINITY_DN14913_c1_g1_i2;TRINITY_DN14913_c1_g1_i3	GO:0005576(extracellular region);GO:0009823(cytokinin catabolic process);GO:0016491(oxidoreductase activity);GO:0016614(oxidoreductase activity, acting on CH-OH group of donors);GO:0019139(cytokinin dehydrogenase activity);GO:0050660(flavin adenine dinucleotide binding);GO:0055114(oxidation-reduction process)	-1.13241	down	yes
TRINITY_DN12463_c1_g7	TRINITY_DN12463_c1_g7_i1;TRINITY_DN12463_c1_g7_i2	GO:0003674(molecular_function);GO:0007275(multicellular organism development);GO:0009507(chloroplast);GO:0009543(chloroplast thylakoid lumen);GO:0016021(integral component of membrane);GO:0031969(chloroplast membrane)	-1.1325	down	yes
TRINITY_DN13866_c0_g2	TRINITY_DN13866_c0_g2_i1	GO:0003674(molecular_function);GO:0005576(extracellular region);GO:0008150(biological_process)	-1.13254	down	yes
TRINITY_DN13387_c0_g1	TRINITY_DN13387_c0_g1_i1;TRINITY_DN13387_c0_g1_i10;TRINITY_DN13387_c0_g1_i11;TRINITY_DN13387_c0_g1_i12;TRINITY_DN13387_c0_g1_i13;TRINITY_DN13387_c0_g1_i2;TRINITY_DN13387_c0_g1_i3;TRINITY_DN13387_c0_g1_i4;TRINITY_DN13387_c0_g1_i5;TRINITY_DN13387_c0_g1_i6;TRINITY_DN13387_c0_g1_i7;TRINITY_DN13387_c0_g1_i8;TRINITY_DN13387_c0_g1_i9	GO:0005739(mitochondrion);GO:0009617(response to bacterium)	-1.13387	down	yes
TRINITY_DN12414_c0_g2	TRINITY_DN12414_c0_g2_i1;TRINITY_DN12414_c0_g2_i2;TRINITY_DN12414_c0_g2_i3	GO:0005886(plasma membrane);GO:0006810(transport);GO:0022857(transmembrane transporter activity)	-1.13388	down	yes
TRINITY_DN15015_c0_g6	TRINITY_DN15015_c0_g6_i1	GO:0003700(DNA binding transcription factor activity);GO:0005634(nucleus);GO:0006351(transcription, DNA-templated);GO:0006355(regulation of transcription, DNA-templated);GO:0040008(regulation of growth);GO:0043565(sequence-specific DNA binding);GO:0046983(protein dimerization activity)	-1.13472	down	yes
TRINITY_DN14080_c1_g5	TRINITY_DN14080_c1_g5_i1;TRINITY_DN14080_c1_g5_i2	GO:0004674(protein serine/threonine kinase activity);GO:0005634(nucleus);GO:0046777(protein autophosphorylation)	-1.1355	down	yes
TRINITY_DN9824_c0_g1	TRINITY_DN9824_c0_g1_i1	GO:0005634(nucleus);GO:0008270(zinc ion binding);GO:0009741(response to brassinosteroid);GO:0010200(response to chitin);GO:0016021(integral component of membrane);GO:0016567(protein ubiquitination);GO:0043161(proteasome-mediated ubiquitin-dependent protein catabolic process);GO:0061630(ubiquitin protein ligase activity)	-1.14145	down	yes
TRINITY_DN15587_c0_g4	TRINITY_DN15587_c0_g4_i1;TRINITY_DN15587_c0_g4_i2;TRINITY_DN15587_c0_g4_i3;TRINITY_DN15587_c0_g4_i4	-	-1.14162	down	yes
TRINITY_DN16377_c0_g1	TRINITY_DN16377_c0_g1_i1;TRINITY_DN16377_c0_g1_i10;TRINITY_DN16377_c0_g1_i11;TRINITY_DN16377_c0_g1_i12;TRINITY_DN16377_c0_g1_i13;TRINITY_DN16377_c0_g1_i14;TRINITY_DN16377_c0_g1_i15;TRINITY_DN16377_c0_g1_i16;TRINITY_DN16377_c0_g1_i17;TRINITY_DN16377_c0_g1_i2;TRINITY_DN16377_c0_g1_i3;TRINITY_DN16377_c0_g1_i4;TRINITY_DN16377_c0_g1_i5;TRINITY_DN16377_c0_g1_i6;TRINITY_DN16377_c0_g1_i7;TRINITY_DN16377_…	GO:0016020(membrane);GO:0016709(oxidoreductase activity, acting on paired donors, with incorporation or reduction of molecular oxygen, NAD(P)H as one donor, and incorporation of one atom of oxygen);GO:0044550(secondary metabolite biosynthetic process)	-1.14328	down	yes
TRINITY_DN10092_c0_g1	TRINITY_DN10092_c0_g1_i1	GO:0005507(copper ion binding);GO:0005576(extracellular region);GO:0005623(cell);GO:0006878(cellular copper ion homeostasis);GO:0008270(zinc ion binding)	-1.14417	down	yes
TRINITY_DN12577_c0_g1	TRINITY_DN12577_c0_g1_i1	GO:0004553(hydrolase activity, hydrolyzing O-glycosyl compounds);GO:0005576(extracellular region);GO:0005618(cell wall);GO:0005794(Golgi apparatus);GO:0005829(cytosol);GO:0005886(plasma membrane);GO:0008810(cellulase activity);GO:0009505(plant-type cell wall);GO:0009506(plasmodesma);GO:0030245(cellulose catabolic process);GO:0071555(cell wall organization)	-1.14435	down	yes
TRINITY_DN16392_c1_g1	TRINITY_DN16392_c1_g1_i1;TRINITY_DN16392_c1_g1_i2;TRINITY_DN16392_c1_g1_i3;TRINITY_DN16392_c1_g1_i4;TRINITY_DN16392_c1_g1_i5;TRINITY_DN16392_c1_g1_i6;TRINITY_DN16392_c1_g1_i7	-	-1.14606	down	yes
TRINITY_DN13670_c0_g3	TRINITY_DN13670_c0_g3_i1	GO:0015292(uniporter activity)	-1.14795	down	yes
TRINITY_DN14148_c1_g5	TRINITY_DN14148_c1_g5_i1	-	-1.15043	down	yes
TRINITY_DN13630_c1_g5	TRINITY_DN13630_c1_g5_i1;TRINITY_DN13630_c1_g5_i2;TRINITY_DN13630_c1_g5_i3	GO:0042273(ribosomal large subunit biogenesis)	-1.15081	down	yes
TRINITY_DN14713_c0_g4	TRINITY_DN14713_c0_g4_i1	-	-1.15127	down	yes
TRINITY_DN15339_c1_g1	TRINITY_DN15339_c1_g1_i1;TRINITY_DN15339_c1_g1_i2;TRINITY_DN15339_c1_g1_i3;TRINITY_DN15339_c1_g1_i4;TRINITY_DN15339_c1_g1_i5;TRINITY_DN15339_c1_g1_i6	GO:0003824(catalytic activity);GO:0005774(vacuolar membrane);GO:0005829(cytosol);GO:0005975(carbohydrate metabolic process);GO:0009051(pentose-phosphate shunt, oxidative branch);GO:0009507(chloroplast);GO:0017057(6-phosphogluconolactonase activity)	-1.15161	down	yes
TRINITY_DN13272_c1_g7	TRINITY_DN13272_c1_g7_i1	GO:0004601(peroxidase activity);GO:0009505(plant-type cell wall);GO:0009664(plant-type cell wall organization)	-1.15246	down	yes
TRINITY_DN11038_c0_g4	TRINITY_DN11038_c0_g4_i1;TRINITY_DN11038_c0_g4_i2	GO:0004712(protein serine/threonine/tyrosine kinase activity);GO:0005737(cytoplasm);GO:0006468(protein phosphorylation);GO:0016301(kinase activity)	-1.1539	down	yes
TRINITY_DN10573_c0_g4	TRINITY_DN10573_c0_g4_i1	GO:0005739(mitochondrion)	-1.15405	down	yes
TRINITY_DN1713_c0_g1	TRINITY_DN1713_c0_g1_i1	-	-1.15405	down	yes
TRINITY_DN15409_c0_g7	TRINITY_DN15409_c0_g7_i1	-	-1.15631	down	yes
TRINITY_DN12725_c1_g5	TRINITY_DN12725_c1_g5_i1	-	-1.15674	down	yes
TRINITY_DN14274_c0_g9	TRINITY_DN14274_c0_g9_i1	GO:0003677(DNA binding);GO:0003700(DNA binding transcription factor activity);GO:0005515(protein binding);GO:0005634(nucleus);GO:0006351(transcription, DNA-templated);GO:0006355(regulation of transcription, DNA-templated);GO:0007275(multicellular organism development);GO:0009793(embryo development ending in seed dormancy);GO:0048759(xylem vessel member cell differentiation);GO:0071555(cell wall o…	-1.1583	down	yes
TRINITY_DN16263_c0_g4	TRINITY_DN16263_c0_g4_i1;TRINITY_DN16263_c0_g4_i2	GO:0016020(membrane);GO:0016709(oxidoreductase activity, acting on paired donors, with incorporation or reduction of molecular oxygen, NAD(P)H as one donor, and incorporation of one atom of oxygen);GO:0044550(secondary metabolite biosynthetic process)	-1.15887	down	yes
TRINITY_DN13645_c1_g3	TRINITY_DN13645_c1_g3_i1;TRINITY_DN13645_c1_g3_i2	GO:0003674(molecular_function);GO:0005634(nucleus);GO:0008150(biological_process)	-1.16023	down	yes
TRINITY_DN10899_c0_g7	TRINITY_DN10899_c0_g7_i1;TRINITY_DN10899_c0_g7_i2	GO:0005634(nucleus);GO:0008168(methyltransferase activity);GO:0032259(methylation)	-1.16037	down	yes
TRINITY_DN15128_c0_g2	TRINITY_DN15128_c0_g2_i1;TRINITY_DN15128_c0_g2_i2;TRINITY_DN15128_c0_g2_i3;TRINITY_DN15128_c0_g2_i4;TRINITY_DN15128_c0_g2_i5;TRINITY_DN15128_c0_g2_i6	-	-1.16326	down	yes
TRINITY_DN12049_c0_g2	TRINITY_DN12049_c0_g2_i1;TRINITY_DN12049_c0_g2_i2;TRINITY_DN12049_c0_g2_i3;TRINITY_DN12049_c0_g2_i4	GO:0000166(nucleotide binding);GO:0005634(nucleus);GO:0005834(heterotrimeric G-protein complex);GO:0008150(biological_process)	-1.16504	down	yes
TRINITY_DN13226_c1_g7	TRINITY_DN13226_c1_g7_i1	GO:0003700(DNA binding transcription factor activity);GO:0005515(protein binding);GO:0005634(nucleus);GO:0006351(transcription, DNA-templated);GO:0006355(regulation of transcription, DNA-templated);GO:0009740(gibberellic acid mediated signaling pathway);GO:0009742(brassinosteroid mediated signaling pathway);GO:0040008(regulation of growth);GO:0043565(sequence-specific DNA binding);GO:0046983(prot…	-1.1673	down	yes
TRINITY_DN15545_c0_g3	TRINITY_DN15545_c0_g3_i1;TRINITY_DN15545_c0_g3_i2;TRINITY_DN15545_c0_g3_i3;TRINITY_DN15545_c0_g3_i4	-	-1.16846	down	yes
TRINITY_DN11368_c1_g2	TRINITY_DN11368_c1_g2_i1;TRINITY_DN11368_c1_g2_i2;TRINITY_DN11368_c1_g2_i3;TRINITY_DN11368_c1_g2_i4	GO:0003677(DNA binding);GO:0003700(DNA binding transcription factor activity);GO:0005634(nucleus);GO:0006351(transcription, DNA-templated);GO:0006355(regulation of transcription, DNA-templated);GO:0007275(multicellular organism development);GO:0008283(cell proliferation);GO:0043565(sequence-specific DNA binding);GO:0071365(cellular response to auxin stimulus)	-1.16947	down	yes
TRINITY_DN13696_c0_g3	TRINITY_DN13696_c0_g3_i1;TRINITY_DN13696_c0_g3_i2;TRINITY_DN13696_c0_g3_i3	GO:0003674(molecular_function);GO:0005634(nucleus)	-1.16952	down	yes
TRINITY_DN12505_c0_g2	TRINITY_DN12505_c0_g2_i1;TRINITY_DN12505_c0_g2_i2;TRINITY_DN12505_c0_g2_i3;TRINITY_DN12505_c0_g2_i4	GO:0003999(adenine phosphoribosyltransferase activity);GO:0005737(cytoplasm);GO:0005829(cytosol);GO:0006166(purine ribonucleoside salvage);GO:0006168(adenine salvage);GO:0009116(nucleoside metabolic process);GO:0016021(integral component of membrane);GO:0044209(AMP salvage)	-1.16969	down	yes
TRINITY_DN14518_c0_g3	TRINITY_DN14518_c0_g3_i1	-	-1.1709	down	yes
TRINITY_DN16439_c1_g3	TRINITY_DN16439_c1_g3_i1	-	-1.1745	down	yes
TRINITY_DN14486_c2_g5	TRINITY_DN14486_c2_g5_i1;TRINITY_DN14486_c2_g5_i2	-	-1.17537	down	yes
TRINITY_DN10879_c0_g2	TRINITY_DN10879_c0_g2_i1;TRINITY_DN10879_c0_g2_i2	GO:0003674(molecular_function);GO:0005739(mitochondrion);GO:0009734(auxin-activated signaling pathway)	-1.17589	down	yes
TRINITY_DN16365_c0_g1	TRINITY_DN16365_c0_g1_i1;TRINITY_DN16365_c0_g1_i2;TRINITY_DN16365_c0_g1_i3;TRINITY_DN16365_c0_g1_i4;TRINITY_DN16365_c0_g1_i5;TRINITY_DN16365_c0_g1_i6;TRINITY_DN16365_c0_g1_i7;TRINITY_DN16365_c0_g1_i8;TRINITY_DN16365_c0_g1_i9	-	-1.17653	down	yes
TRINITY_DN12592_c0_g2	TRINITY_DN12592_c0_g2_i1;TRINITY_DN12592_c0_g2_i2;TRINITY_DN12592_c0_g2_i3	-	-1.17667	down	yes
TRINITY_DN11894_c0_g5	TRINITY_DN11894_c0_g5_i1;TRINITY_DN11894_c0_g5_i2	-	-1.17756	down	yes
TRINITY_DN16410_c0_g4	TRINITY_DN16410_c0_g4_i1;TRINITY_DN16410_c0_g4_i2	-	-1.17871	down	yes
TRINITY_DN12909_c0_g2	TRINITY_DN12909_c0_g2_i1;TRINITY_DN12909_c0_g2_i2	GO:0008150(biological_process);GO:0016021(integral component of membrane);GO:0016740(transferase activity)	-1.17872	down	yes
TRINITY_DN11614_c0_g6	TRINITY_DN11614_c0_g6_i1;TRINITY_DN11614_c0_g6_i2	GO:0010223(secondary shoot formation);GO:0016787(hydrolase activity);GO:1901601(strigolactone biosynthetic process)	-1.18251	down	yes
TRINITY_DN11697_c0_g11	TRINITY_DN11697_c0_g11_i1	GO:0003700(DNA binding transcription factor activity);GO:0003712(transcription cofactor activity);GO:0005515(protein binding);GO:0005634(nucleus);GO:0006351(transcription, DNA-templated);GO:0006355(regulation of transcription, DNA-templated);GO:0043565(sequence-specific DNA binding);GO:0046982(protein heterodimerization activity);GO:0048574(long-day photoperiodism, flowering)	-1.18466	down	yes
TRINITY_DN11582_c0_g4	TRINITY_DN11582_c0_g4_i1	GO:0005737(cytoplasm);GO:0016740(transferase activity);GO:0016747(transferase activity, transferring acyl groups other than amino-acyl groups)	-1.18499	down	yes
TRINITY_DN8576_c0_g1	TRINITY_DN8576_c0_g1_i1;TRINITY_DN8576_c0_g1_i2	GO:0005739(mitochondrion);GO:0009735(response to cytokinin);GO:0016757(transferase activity, transferring glycosyl groups)	-1.18679	down	yes
TRINITY_DN12944_c0_g3	TRINITY_DN12944_c0_g3_i1;TRINITY_DN12944_c0_g3_i2	GO:0003674(molecular_function);GO:0005575(cellular_component);GO:0008150(biological_process)	-1.18902	down	yes
TRINITY_DN16331_c0_g3	TRINITY_DN16331_c0_g3_i1;TRINITY_DN16331_c0_g3_i2;TRINITY_DN16331_c0_g3_i3;TRINITY_DN16331_c0_g3_i4	GO:0005744(mitochondrial inner membrane presequence translocase complex);GO:0030150(protein import into mitochondrial matrix);GO:0031305(integral component of mitochondrial inner membrane)	-1.18963	down	yes
TRINITY_DN15259_c0_g2	TRINITY_DN15259_c0_g2_i1;TRINITY_DN15259_c0_g2_i2;TRINITY_DN15259_c0_g2_i3;TRINITY_DN15259_c0_g2_i4;TRINITY_DN15259_c0_g2_i5;TRINITY_DN15259_c0_g2_i6;TRINITY_DN15259_c0_g2_i7;TRINITY_DN15259_c0_g2_i8	GO:0004356(glutamate-ammonia ligase activity)	-1.18996	down	yes
TRINITY_DN14562_c0_g3	TRINITY_DN14562_c0_g3_i1;TRINITY_DN14562_c0_g3_i10;TRINITY_DN14562_c0_g3_i11;TRINITY_DN14562_c0_g3_i12;TRINITY_DN14562_c0_g3_i13;TRINITY_DN14562_c0_g3_i14;TRINITY_DN14562_c0_g3_i15;TRINITY_DN14562_c0_g3_i16;TRINITY_DN14562_c0_g3_i17;TRINITY_DN14562_c0_g3_i18;TRINITY_DN14562_c0_g3_i2;TRINITY_DN14562_c0_g3_i3;TRINITY_DN14562_c0_g3_i4;TRINITY_DN14562_c0_g3_i5;TRINITY_DN14562_c0_g3_i6;TRINITY_DN14562…	GO:0005737(cytoplasm);GO:0008270(zinc ion binding);GO:0009809(lignin biosynthetic process);GO:0045551(cinnamyl-alcohol dehydrogenase activity);GO:0052747(sinapyl alcohol dehydrogenase activity);GO:0055114(oxidation-reduction process)	-1.19118	down	yes
TRINITY_DN10832_c0_g8	TRINITY_DN10832_c0_g8_i1	GO:0000139(Golgi membrane);GO:0003824(catalytic activity);GO:0005618(cell wall);GO:0005794(Golgi apparatus);GO:0006486(protein glycosylation);GO:0016020(membrane);GO:0016021(integral component of membrane);GO:0016757(transferase activity, transferring glycosyl groups)	-1.19352	down	yes
TRINITY_DN10825_c0_g4	TRINITY_DN10825_c0_g4_i1	GO:0004564(beta-fructofuranosidase activity);GO:0004575(sucrose alpha-glucosidase activity);GO:0005634(nucleus);GO:0005829(cytosol);GO:0005975(carbohydrate metabolic process);GO:0033926(glycopeptide alpha-N-acetylgalactosaminidase activity)	-1.1952	down	yes
TRINITY_DN13793_c0_g5	TRINITY_DN13793_c0_g5_i1;TRINITY_DN13793_c0_g5_i2	-	-1.19641	down	yes
TRINITY_DN13612_c0_g3	TRINITY_DN13612_c0_g3_i1;TRINITY_DN13612_c0_g3_i2	GO:0009507(chloroplast);GO:0016787(hydrolase activity)	-1.19698	down	yes
TRINITY_DN9941_c0_g1	TRINITY_DN9941_c0_g1_i1;TRINITY_DN9941_c0_g1_i2	GO:0003735(structural constituent of ribosome);GO:0005739(mitochondrion);GO:0005840(ribosome);GO:0006412(translation)	-1.19728	down	yes
TRINITY_DN15085_c0_g5	TRINITY_DN15085_c0_g5_i1;TRINITY_DN15085_c0_g5_i2;TRINITY_DN15085_c0_g5_i3	GO:0003964(RNA-directed DNA polymerase activity);GO:0005737(cytoplasm)	-1.1973	down	yes
TRINITY_DN15159_c0_g2	TRINITY_DN15159_c0_g2_i1;TRINITY_DN15159_c0_g2_i2;TRINITY_DN15159_c0_g2_i3	GO:0016020(membrane);GO:0016709(oxidoreductase activity, acting on paired donors, with incorporation or reduction of molecular oxygen, NAD(P)H as one donor, and incorporation of one atom of oxygen);GO:0044550(secondary metabolite biosynthetic process)	-1.1979	down	yes
TRINITY_DN8448_c0_g1	TRINITY_DN8448_c0_g1_i1	GO:0003677(DNA binding);GO:0003700(DNA binding transcription factor activity);GO:0005515(protein binding);GO:0005634(nucleus);GO:0006351(transcription, DNA-templated);GO:0006355(regulation of transcription, DNA-templated);GO:0046983(protein dimerization activity)	-1.19904	down	yes
TRINITY_DN12024_c0_g1	TRINITY_DN12024_c0_g1_i1;TRINITY_DN12024_c0_g1_i2;TRINITY_DN12024_c0_g1_i3;TRINITY_DN12024_c0_g1_i4;TRINITY_DN12024_c0_g1_i5	GO:0000103(sulfate assimilation);GO:0006457(protein folding);GO:0009507(chloroplast);GO:0015035(protein disulfide oxidoreductase activity);GO:0016671(oxidoreductase activity, acting on a sulfur group of donors, disulfide as acceptor);GO:0034599(cellular response to oxidative stress);GO:0045454(cell redox homeostasis);GO:0055114(oxidation-reduction process)	-1.20219	down	yes
TRINITY_DN15438_c1_g3	TRINITY_DN15438_c1_g3_i1;TRINITY_DN15438_c1_g3_i2;TRINITY_DN15438_c1_g3_i3;TRINITY_DN15438_c1_g3_i4;TRINITY_DN15438_c1_g3_i5;TRINITY_DN15438_c1_g3_i6	GO:0034219(carbohydrate transmembrane transport)	-1.20422	down	yes
TRINITY_DN13563_c0_g3	TRINITY_DN13563_c0_g3_i1;TRINITY_DN13563_c0_g3_i2	GO:0005215(transporter activity);GO:0005509(calcium ion binding);GO:0005886(plasma membrane);GO:0009624(response to nematode);GO:0010119(regulation of stomatal movement);GO:0015293(symporter activity);GO:0015333(peptide:proton symporter activity);GO:0016020(membrane);GO:0016021(integral component of membrane);GO:0042128(nitrate assimilation);GO:0055085(transmembrane transport);GO:0080168(abscisic…	-1.20514	down	yes
TRINITY_DN14577_c0_g2	TRINITY_DN14577_c0_g2_i1;TRINITY_DN14577_c0_g2_i2;TRINITY_DN14577_c0_g2_i3;TRINITY_DN14577_c0_g2_i4;TRINITY_DN14577_c0_g2_i5;TRINITY_DN14577_c0_g2_i6;TRINITY_DN14577_c0_g2_i7;TRINITY_DN14577_c0_g2_i8;TRINITY_DN14577_c0_g2_i9	GO:0002084(protein depalmitoylation);GO:0005737(cytoplasm);GO:0008474(palmitoyl-(protein) hydrolase activity);GO:0052689(carboxylic ester hydrolase activity)	-1.20538	down	yes
TRINITY_DN12887_c1_g4	TRINITY_DN12887_c1_g4_i1	GO:0009055(electron transfer activity);GO:0009507(chloroplast)	-1.20876	down	yes
TRINITY_DN13831_c1_g1	TRINITY_DN13831_c1_g1_i1;TRINITY_DN13831_c1_g1_i2;TRINITY_DN13831_c1_g1_i3;TRINITY_DN13831_c1_g1_i4	GO:0000139(Golgi membrane);GO:0000271(polysaccharide biosynthetic process);GO:0000977(RNA polymerase II regulatory region sequence-specific DNA binding);GO:0005794(Golgi apparatus);GO:0005886(plasma membrane);GO:0009833(plant-type primary cell wall biogenesis);GO:0016021(integral component of membrane);GO:0016740(transferase activity);GO:0016757(transferase activity, transferring glycosyl groups)…	-1.21263	down	yes
TRINITY_DN16102_c0_g1	TRINITY_DN16102_c0_g1_i1;TRINITY_DN16102_c0_g1_i2;TRINITY_DN16102_c0_g1_i3;TRINITY_DN16102_c0_g1_i4;TRINITY_DN16102_c0_g1_i5	-	-1.21266	down	yes
TRINITY_DN14915_c0_g5	TRINITY_DN14915_c0_g5_i1	GO:0003964(RNA-directed DNA polymerase activity);GO:0005737(cytoplasm)	-1.21366	down	yes
TRINITY_DN10914_c0_g5	TRINITY_DN10914_c0_g5_i1;TRINITY_DN10914_c0_g5_i2	GO:0005634(nucleus);GO:0009416(response to light stimulus);GO:0009909(regulation of flower development)	-1.21454	down	yes
TRINITY_DN14500_c1_g1	TRINITY_DN14500_c1_g1_i1;TRINITY_DN14500_c1_g1_i2;TRINITY_DN14500_c1_g1_i3;TRINITY_DN14500_c1_g1_i4;TRINITY_DN14500_c1_g1_i5;TRINITY_DN14500_c1_g1_i6	-	-1.2189	down	yes
TRINITY_DN10556_c0_g2	TRINITY_DN10556_c0_g2_i1;TRINITY_DN10556_c0_g2_i2;TRINITY_DN10556_c0_g2_i3;TRINITY_DN10556_c0_g2_i4	-	-1.2207	down	yes
TRINITY_DN12171_c0_g6	TRINITY_DN12171_c0_g6_i1	GO:0005634(nucleus);GO:0006457(protein folding);GO:0009507(chloroplast);GO:0009536(plastid);GO:0009570(chloroplast stroma)	-1.22578	down	yes
TRINITY_DN12104_c0_g2	TRINITY_DN12104_c0_g2_i1;TRINITY_DN12104_c0_g2_i2;TRINITY_DN12104_c0_g2_i3;TRINITY_DN12104_c0_g2_i4	GO:0005887(integral component of plasma membrane);GO:0008509(anion transmembrane transporter activity);GO:0051453(regulation of intracellular pH);GO:0098656(anion transmembrane transport)	-1.22688	down	yes
TRINITY_DN11971_c0_g5	TRINITY_DN11971_c0_g5_i1	GO:0005576(extracellular region);GO:0006629(lipid metabolic process);GO:0016298(lipase activity);GO:0016787(hydrolase activity)	-1.22981	down	yes
TRINITY_DN16087_c0_g4	TRINITY_DN16087_c0_g4_i1;TRINITY_DN16087_c0_g4_i2	-	-1.23208	down	yes
TRINITY_DN12186_c0_g3	TRINITY_DN12186_c0_g3_i1;TRINITY_DN12186_c0_g3_i2;TRINITY_DN12186_c0_g3_i3	-	-1.23327	down	yes
TRINITY_DN15159_c0_g3	TRINITY_DN15159_c0_g3_i1;TRINITY_DN15159_c0_g3_i2;TRINITY_DN15159_c0_g3_i3;TRINITY_DN15159_c0_g3_i4;TRINITY_DN15159_c0_g3_i5	GO:0016020(membrane);GO:0016709(oxidoreductase activity, acting on paired donors, with incorporation or reduction of molecular oxygen, NAD(P)H as one donor, and incorporation of one atom of oxygen);GO:0044550(secondary metabolite biosynthetic process)	-1.23531	down	yes
TRINITY_DN14763_c0_g2	TRINITY_DN14763_c0_g2_i1;TRINITY_DN14763_c0_g2_i2;TRINITY_DN14763_c0_g2_i3	GO:0003677(DNA binding);GO:0003700(DNA binding transcription factor activity);GO:0005515(protein binding);GO:0005634(nucleus);GO:0006351(transcription, DNA-templated);GO:0006355(regulation of transcription, DNA-templated);GO:0009739(response to gibberellin);GO:0046983(protein dimerization activity)	-1.23795	down	yes
TRINITY_DN12804_c0_g3	TRINITY_DN12804_c0_g3_i1;TRINITY_DN12804_c0_g3_i2;TRINITY_DN12804_c0_g3_i3;TRINITY_DN12804_c0_g3_i4	GO:0005886(plasma membrane);GO:0016301(kinase activity);GO:0016310(phosphorylation)	-1.24015	down	yes
TRINITY_DN13410_c0_g3	TRINITY_DN13410_c0_g3_i1;TRINITY_DN13410_c0_g3_i2;TRINITY_DN13410_c0_g3_i3;TRINITY_DN13410_c0_g3_i4	GO:0005737(cytoplasm);GO:0005886(plasma membrane);GO:0008270(zinc ion binding);GO:0016021(integral component of membrane)	-1.24074	down	yes
TRINITY_DN16623_c0_g3	TRINITY_DN16623_c0_g3_i1;TRINITY_DN16623_c0_g3_i2	-	-1.24107	down	yes
TRINITY_DN10775_c0_g8	TRINITY_DN10775_c0_g8_i1	GO:0006855(drug transmembrane transport)	-1.24204	down	yes
TRINITY_DN10573_c0_g6	TRINITY_DN10573_c0_g6_i1;TRINITY_DN10573_c0_g6_i2	GO:0005739(mitochondrion)	-1.24313	down	yes
TRINITY_DN12673_c0_g5	TRINITY_DN12673_c0_g5_i1;TRINITY_DN12673_c0_g5_i2	GO:0004672(protein kinase activity);GO:0004674(protein serine/threonine kinase activity);GO:0005524(ATP binding);GO:0005886(plasma membrane);GO:0006468(protein phosphorylation);GO:0007169(transmembrane receptor protein tyrosine kinase signaling pathway);GO:0016021(integral component of membrane);GO:0016301(kinase activity);GO:2000604(negative regulation of secondary growth)	-1.24577	down	yes
TRINITY_DN13077_c0_g3	TRINITY_DN13077_c0_g3_i1;TRINITY_DN13077_c0_g3_i2;TRINITY_DN13077_c0_g3_i3	GO:0005829(cytosol);GO:0008202(steroid metabolic process);GO:0009611(response to wounding);GO:0010051(xylem and phloem pattern formation);GO:0035671(enone reductase activity);GO:0047787(delta4-3-oxosteroid 5beta-reductase activity);GO:0055114(oxidation-reduction process)	-1.24672	down	yes
TRINITY_DN13029_c0_g6	TRINITY_DN13029_c0_g6_i1;TRINITY_DN13029_c0_g6_i2	-	-1.24686	down	yes
TRINITY_DN15581_c1_g3	TRINITY_DN15581_c1_g3_i1;TRINITY_DN15581_c1_g3_i2;TRINITY_DN15581_c1_g3_i3;TRINITY_DN15581_c1_g3_i4	-	-1.24857	down	yes
TRINITY_DN12331_c0_g1	TRINITY_DN12331_c0_g1_i1;TRINITY_DN12331_c0_g1_i2;TRINITY_DN12331_c0_g1_i3;TRINITY_DN12331_c0_g1_i4;TRINITY_DN12331_c0_g1_i5;TRINITY_DN12331_c0_g1_i6	GO:0005634(nucleus);GO:0005829(cytosol);GO:0005983(starch catabolic process);GO:0009414(response to water deprivation);GO:0009507(chloroplast);GO:0016161(beta-amylase activity);GO:0102229(amylopectin maltohydrolase activity)	-1.25184	down	yes
TRINITY_DN16368_c1_g5	TRINITY_DN16368_c1_g5_i1	GO:0000775(chromosome, centromeric region);GO:0000798(nuclear cohesin complex);GO:0003682(chromatin binding);GO:0005634(nucleus);GO:0006302(double-strand break repair);GO:0007062(sister chromatid cohesion);GO:0051301(cell division);GO:0070601(centromeric sister chromatid cohesion)	-1.25609	down	yes
TRINITY_DN11667_c0_g1	TRINITY_DN11667_c0_g1_i1;TRINITY_DN11667_c0_g1_i2	-	-1.25625	down	yes
TRINITY_DN16361_c0_g3	TRINITY_DN16361_c0_g3_i1;TRINITY_DN16361_c0_g3_i2	GO:0000151(ubiquitin ligase complex);GO:0004842(ubiquitin-protein transferase activity);GO:0016567(protein ubiquitination);GO:0043130(ubiquitin binding)	-1.26461	down	yes
TRINITY_DN13832_c0_g4	TRINITY_DN13832_c0_g4_i1	GO:0016020(membrane);GO:0016709(oxidoreductase activity, acting on paired donors, with incorporation or reduction of molecular oxygen, NAD(P)H as one donor, and incorporation of one atom of oxygen);GO:0044550(secondary metabolite biosynthetic process)	-1.26956	down	yes
TRINITY_DN14558_c0_g5	TRINITY_DN14558_c0_g5_i1	GO:0003674(molecular_function);GO:0005886(plasma membrane)	-1.27232	down	yes
TRINITY_DN10574_c0_g3	TRINITY_DN10574_c0_g3_i1	GO:0004126(cytidine deaminase activity);GO:0005829(cytosol);GO:0008270(zinc ion binding);GO:0009972(cytidine deamination)	-1.27239	down	yes
TRINITY_DN14350_c0_g1	TRINITY_DN14350_c0_g1_i1;TRINITY_DN14350_c0_g1_i2;TRINITY_DN14350_c0_g1_i3;TRINITY_DN14350_c0_g1_i4	GO:0005737(cytoplasm);GO:0030001(metal ion transport);GO:0046914(transition metal ion binding);GO:0046916(cellular transition metal ion homeostasis)	-1.27441	down	yes
TRINITY_DN12391_c1_g3	TRINITY_DN12391_c1_g3_i1;TRINITY_DN12391_c1_g3_i2;TRINITY_DN12391_c1_g3_i3;TRINITY_DN12391_c1_g3_i4	GO:0005789(endoplasmic reticulum membrane);GO:0009672(auxin:proton symporter activity);GO:0009733(response to auxin);GO:0009734(auxin-activated signaling pathway);GO:0009926(auxin polar transport);GO:0016021(integral component of membrane);GO:0055085(transmembrane transport)	-1.27524	down	yes
TRINITY_DN12573_c0_g3	TRINITY_DN12573_c0_g3_i1;TRINITY_DN12573_c0_g3_i2	GO:0003674(molecular_function);GO:0005634(nucleus);GO:0008150(biological_process)	-1.27739	down	yes
TRINITY_DN13729_c2_g3	TRINITY_DN13729_c2_g3_i1;TRINITY_DN13729_c2_g3_i2;TRINITY_DN13729_c2_g3_i3;TRINITY_DN13729_c2_g3_i4	GO:0000719(photoreactive repair);GO:0003904(deoxyribodipyrimidine photo-lyase activity)	-1.28426	down	yes
TRINITY_DN11408_c0_g7	TRINITY_DN11408_c0_g7_i1;TRINITY_DN11408_c0_g7_i2	GO:0005515(protein binding);GO:0005634(nucleus);GO:0016301(kinase activity);GO:0016310(phosphorylation)	-1.28516	down	yes
TRINITY_DN12121_c0_g1	TRINITY_DN12121_c0_g1_i1;TRINITY_DN12121_c0_g1_i2;TRINITY_DN12121_c0_g1_i3;TRINITY_DN12121_c0_g1_i4;TRINITY_DN12121_c0_g1_i5;TRINITY_DN12121_c0_g1_i6	GO:0016985(mannan endo-1,4-beta-mannosidase activity);GO:0046355(mannan catabolic process)	-1.28652	down	yes
TRINITY_DN12367_c0_g1	TRINITY_DN12367_c0_g1_i1;TRINITY_DN12367_c0_g1_i2;TRINITY_DN12367_c0_g1_i3	GO:0005737(cytoplasm);GO:0006541(glutamine metabolic process);GO:0016740(transferase activity)	-1.29121	down	yes
TRINITY_DN9064_c0_g1	TRINITY_DN9064_c0_g1_i1	GO:0005634(nucleus);GO:0052689(carboxylic ester hydrolase activity)	-1.29355	down	yes
TRINITY_DN12979_c0_g5	TRINITY_DN12979_c0_g5_i1;TRINITY_DN12979_c0_g5_i2	-	-1.29411	down	yes
TRINITY_DN9634_c0_g1	TRINITY_DN9634_c0_g1_i1	GO:0003674(molecular_function);GO:0005739(mitochondrion);GO:0006979(response to oxidative stress);GO:0016021(integral component of membrane)	-1.29556	down	yes
TRINITY_DN15707_c0_g2	TRINITY_DN15707_c0_g2_i1;TRINITY_DN15707_c0_g2_i2	GO:0003723(RNA binding);GO:0003964(RNA-directed DNA polymerase activity);GO:0005737(cytoplasm);GO:0006278(RNA-dependent DNA biosynthetic process);GO:0015074(DNA integration)	-1.29693	down	yes
TRINITY_DN13597_c0_g1	TRINITY_DN13597_c0_g1_i1;TRINITY_DN13597_c0_g1_i2;TRINITY_DN13597_c0_g1_i3	GO:0000103(sulfate assimilation);GO:0004604(phosphoadenylyl-sulfate reductase (thioredoxin) activity);GO:0009507(chloroplast);GO:0009534(chloroplast thylakoid);GO:0009570(chloroplast stroma);GO:0009973(adenylyl-sulfate reductase activity);GO:0016671(oxidoreductase activity, acting on a sulfur group of donors, disulfide as acceptor);GO:0019344(cysteine biosynthetic process);GO:0019379(sulfate assi…	-1.299	down	yes
TRINITY_DN11539_c0_g5	TRINITY_DN11539_c0_g5_i1;TRINITY_DN11539_c0_g5_i2	GO:0004555(alpha,alpha-trehalase activity);GO:0005993(trehalose catabolic process)	-1.30096	down	yes
TRINITY_DN11102_c0_g2	TRINITY_DN11102_c0_g2_i1	-	-1.30189	down	yes
TRINITY_DN15301_c0_g2	TRINITY_DN15301_c0_g2_i1;TRINITY_DN15301_c0_g2_i2;TRINITY_DN15301_c0_g2_i3;TRINITY_DN15301_c0_g2_i4	-	-1.30635	down	yes
TRINITY_DN16440_c0_g1	TRINITY_DN16440_c0_g1_i1;TRINITY_DN16440_c0_g1_i2;TRINITY_DN16440_c0_g1_i3	-	-1.31243	down	yes
TRINITY_DN13597_c1_g2	TRINITY_DN13597_c1_g2_i1	GO:0000103(sulfate assimilation);GO:0004604(phosphoadenylyl-sulfate reductase (thioredoxin) activity);GO:0009507(chloroplast);GO:0009973(adenylyl-sulfate reductase activity);GO:0016671(oxidoreductase activity, acting on a sulfur group of donors, disulfide as acceptor);GO:0019344(cysteine biosynthetic process);GO:0019419(sulfate reduction);GO:0033741(adenylyl-sulfate reductase (glutathione) activi…	-1.31667	down	yes
TRINITY_DN15781_c0_g1	TRINITY_DN15781_c0_g1_i1;TRINITY_DN15781_c0_g1_i2	GO:0000977(RNA polymerase II regulatory region sequence-specific DNA binding);GO:0003677(DNA binding);GO:0003700(DNA binding transcription factor activity);GO:0005515(protein binding);GO:0005634(nucleus);GO:0006351(transcription, DNA-templated);GO:0007275(multicellular organism development);GO:0008134(transcription factor binding);GO:0009960(endosperm development);GO:0045944(positive regulation o…	-1.31771	down	yes
TRINITY_DN14224_c0_g3	TRINITY_DN14224_c0_g3_i1	-	-1.32202	down	yes
TRINITY_DN11302_c0_g2	TRINITY_DN11302_c0_g2_i1;TRINITY_DN11302_c0_g2_i2;TRINITY_DN11302_c0_g2_i3;TRINITY_DN11302_c0_g2_i4;TRINITY_DN11302_c0_g2_i5;TRINITY_DN11302_c0_g2_i6;TRINITY_DN11302_c0_g2_i7	-	-1.32869	down	yes
TRINITY_DN13034_c0_g3	TRINITY_DN13034_c0_g3_i1	GO:0004601(peroxidase activity);GO:0005515(protein binding);GO:0005576(extracellular region);GO:0005618(cell wall);GO:0005794(Golgi apparatus);GO:0005829(cytosol);GO:0006979(response to oxidative stress);GO:0009809(lignin biosynthetic process);GO:0010089(xylem development);GO:0020037(heme binding);GO:0042744(hydrogen peroxide catabolic process);GO:0046872(metal ion binding);GO:0048046(apoplast);G…	-1.33199	down	yes
TRINITY_DN10663_c0_g9	TRINITY_DN10663_c0_g9_i1	GO:0004026(alcohol O-acetyltransferase activity)	-1.33462	down	yes
TRINITY_DN12125_c0_g2	TRINITY_DN12125_c0_g2_i1;TRINITY_DN12125_c0_g2_i2;TRINITY_DN12125_c0_g2_i3;TRINITY_DN12125_c0_g2_i4;TRINITY_DN12125_c0_g2_i5;TRINITY_DN12125_c0_g2_i6	GO:0005249(voltage-gated potassium channel activity);GO:0005887(integral component of plasma membrane);GO:0042391(regulation of membrane potential)	-1.33927	down	yes
TRINITY_DN16281_c0_g1	TRINITY_DN16281_c0_g1_i1	GO:0005634(nucleus);GO:0006970(response to osmotic stress);GO:0009414(response to water deprivation);GO:0009651(response to salt stress);GO:0009737(response to abscisic acid);GO:0009738(abscisic acid-activated signaling pathway);GO:0010029(regulation of seed germination);GO:0010228(vegetative to reproductive phase transition of meristem)	-1.35258	down	yes
TRINITY_DN15188_c0_g3	TRINITY_DN15188_c0_g3_i1;TRINITY_DN15188_c0_g3_i2;TRINITY_DN15188_c0_g3_i3;TRINITY_DN15188_c0_g3_i4	GO:0005634(nucleus);GO:0005737(cytoplasm);GO:0008150(biological_process)	-1.35532	down	yes
TRINITY_DN15988_c0_g5	TRINITY_DN15988_c0_g5_i1;TRINITY_DN15988_c0_g5_i2	GO:0003700(DNA binding transcription factor activity);GO:0005634(nucleus);GO:0006351(transcription, DNA-templated);GO:0006355(regulation of transcription, DNA-templated);GO:0007275(multicellular organism development);GO:0009753(response to jasmonic acid);GO:0044212(transcription regulatory region DNA binding);GO:0045995(regulation of embryonic development);GO:0048317(seed morphogenesis);GO:008006…	-1.3609	down	yes
TRINITY_DN12695_c0_g8	TRINITY_DN12695_c0_g8_i1;TRINITY_DN12695_c0_g8_i2;TRINITY_DN12695_c0_g8_i3	-	-1.36139	down	yes
TRINITY_DN16180_c0_g3	TRINITY_DN16180_c0_g3_i1	GO:0003676(nucleic acid binding);GO:0003700(DNA binding transcription factor activity);GO:0005515(protein binding);GO:0005634(nucleus);GO:0006355(regulation of transcription, DNA-templated);GO:0008270(zinc ion binding);GO:0009738(abscisic acid-activated signaling pathway);GO:0009788(negative regulation of abscisic acid-activated signaling pathway);GO:0044212(transcription regulatory region DNA bi…	-1.36559	down	yes
TRINITY_DN15391_c0_g1	TRINITY_DN15391_c0_g1_i1;TRINITY_DN15391_c0_g1_i2	GO:0006817(phosphate ion transport);GO:0009705(plant-type vacuole membrane);GO:0016021(integral component of membrane);GO:0055085(transmembrane transport);GO:1905011(transmembrane phosphate ion transport from cytosol to vacuole)	-1.37024	down	yes
TRINITY_DN14870_c1_g1	TRINITY_DN14870_c1_g1_i1;TRINITY_DN14870_c1_g1_i2;TRINITY_DN14870_c1_g1_i3;TRINITY_DN14870_c1_g1_i4	GO:0004089(carbonate dehydratase activity);GO:0005886(plasma membrane);GO:0008270(zinc ion binding);GO:0009409(response to cold);GO:0009507(chloroplast);GO:0009535(chloroplast thylakoid membrane);GO:0009570(chloroplast stroma);GO:0009579(thylakoid);GO:0009817(defense response to fungus, incompatible interaction);GO:0009941(chloroplast envelope);GO:0010037(response to carbon dioxide);GO:0010119(re…	-1.37196	down	yes
TRINITY_DN9545_c0_g1	TRINITY_DN9545_c0_g1_i1;TRINITY_DN9545_c0_g1_i2	GO:0005634(nucleus);GO:0008150(biological_process)	-1.37218	down	yes
TRINITY_DN13622_c0_g3	TRINITY_DN13622_c0_g3_i1;TRINITY_DN13622_c0_g3_i2;TRINITY_DN13622_c0_g3_i3;TRINITY_DN13622_c0_g3_i4	GO:0004842(ubiquitin-protein transferase activity);GO:0031463(Cul3-RING ubiquitin ligase complex)	-1.37322	down	yes
TRINITY_DN11127_c0_g1	TRINITY_DN11127_c0_g1_i1;TRINITY_DN11127_c0_g1_i2;TRINITY_DN11127_c0_g1_i3	-	-1.37378	down	yes
TRINITY_DN11565_c0_g6	TRINITY_DN11565_c0_g6_i1;TRINITY_DN11565_c0_g6_i2;TRINITY_DN11565_c0_g6_i3;TRINITY_DN11565_c0_g6_i4	-	-1.37442	down	yes
TRINITY_DN10775_c0_g7	TRINITY_DN10775_c0_g7_i1	GO:0003674(molecular_function);GO:0005615(extracellular space);GO:0005618(cell wall);GO:0005794(Golgi apparatus);GO:0005829(cytosol);GO:0008150(biological_process);GO:0009505(plant-type cell wall);GO:0009506(plasmodesma);GO:0009507(chloroplast);GO:0048046(apoplast)	-1.37521	down	yes
TRINITY_DN9045_c0_g1	TRINITY_DN9045_c0_g1_i1	GO:0009507(chloroplast)	-1.38042	down	yes
TRINITY_DN9975_c0_g1	TRINITY_DN9975_c0_g1_i1	GO:0005739(mitochondrion);GO:0006508(proteolysis);GO:0008237(metallopeptidase activity);GO:0009408(response to heat);GO:0009644(response to high light intensity);GO:0016021(integral component of membrane);GO:0031969(chloroplast membrane);GO:0042542(response to hydrogen peroxide)	-1.38614	down	yes
TRINITY_DN12927_c1_g2	TRINITY_DN12927_c1_g2_i1;TRINITY_DN12927_c1_g2_i10;TRINITY_DN12927_c1_g2_i11;TRINITY_DN12927_c1_g2_i12;TRINITY_DN12927_c1_g2_i13;TRINITY_DN12927_c1_g2_i14;TRINITY_DN12927_c1_g2_i15;TRINITY_DN12927_c1_g2_i16;TRINITY_DN12927_c1_g2_i17;TRINITY_DN12927_c1_g2_i2;TRINITY_DN12927_c1_g2_i3;TRINITY_DN12927_c1_g2_i4;TRINITY_DN12927_c1_g2_i5;TRINITY_DN12927_c1_g2_i6;TRINITY_DN12927_c1_g2_i7;TRINITY_DN12927_…	GO:0000293(ferric-chelate reductase activity);GO:0006811(ion transport);GO:0009507(chloroplast);GO:0009767(photosynthetic electron transport chain);GO:0016020(membrane);GO:0016021(integral component of membrane);GO:0016491(oxidoreductase activity);GO:0031969(chloroplast membrane);GO:0046872(metal ion binding);GO:0055114(oxidation-reduction process)	-1.3879	down	yes
TRINITY_DN13793_c0_g3	TRINITY_DN13793_c0_g3_i1;TRINITY_DN13793_c0_g3_i2;TRINITY_DN13793_c0_g3_i3	GO:0005634(nucleus);GO:0008168(methyltransferase activity);GO:0008757(S-adenosylmethionine-dependent methyltransferase activity);GO:0032259(methylation)	-1.38921	down	yes
TRINITY_DN11572_c0_g3	TRINITY_DN11572_c0_g3_i1	GO:0003677(DNA binding);GO:0005634(nucleus);GO:0006355(regulation of transcription, DNA-templated);GO:0007275(multicellular organism development);GO:0009299(mRNA transcription);GO:0009416(response to light stimulus)	-1.39707	down	yes
TRINITY_DN10866_c0_g2	TRINITY_DN10866_c0_g2_i1	GO:0005739(mitochondrion);GO:0009733(response to auxin)	-1.39912	down	yes
TRINITY_DN15821_c0_g1	TRINITY_DN15821_c0_g1_i1;TRINITY_DN15821_c0_g1_i2	GO:0003674(molecular_function);GO:0005737(cytoplasm);GO:0008150(biological_process);GO:0080008(Cul4-RING E3 ubiquitin ligase complex)	-1.3995	down	yes
TRINITY_DN13557_c1_g5	TRINITY_DN13557_c1_g5_i1	GO:0005737(cytoplasm);GO:0030001(metal ion transport);GO:0046914(transition metal ion binding);GO:0046916(cellular transition metal ion homeostasis)	-1.40493	down	yes
TRINITY_DN12605_c0_g1	TRINITY_DN12605_c0_g1_i1;TRINITY_DN12605_c0_g1_i2;TRINITY_DN12605_c0_g1_i3;TRINITY_DN12605_c0_g1_i4	GO:0005515(protein binding)	-1.4127	down	yes
TRINITY_DN13597_c1_g3	TRINITY_DN13597_c1_g3_i1;TRINITY_DN13597_c1_g3_i2	GO:0000103(sulfate assimilation);GO:0004604(phosphoadenylyl-sulfate reductase (thioredoxin) activity);GO:0005737(cytoplasm);GO:0009507(chloroplast);GO:0009534(chloroplast thylakoid);GO:0009536(plastid);GO:0009570(chloroplast stroma);GO:0009973(adenylyl-sulfate reductase activity);GO:0019344(cysteine biosynthetic process);GO:0019419(sulfate reduction);GO:0033741(adenylyl-sulfate reductase (glutath…	-1.41307	down	yes
TRINITY_DN12071_c0_g6	TRINITY_DN12071_c0_g6_i1;TRINITY_DN12071_c0_g6_i2	GO:0003677(DNA binding);GO:0003700(DNA binding transcription factor activity);GO:0005634(nucleus);GO:0005829(cytosol);GO:0006355(regulation of transcription, DNA-templated);GO:0010629(negative regulation of gene expression);GO:0044212(transcription regulatory region DNA binding);GO:0048449(floral organ formation);GO:0090701(specification of plant organ identity)	-1.41622	down	yes
TRINITY_DN8990_c0_g1	TRINITY_DN8990_c0_g1_i1	GO:0003674(molecular_function);GO:0008150(biological_process);GO:0009507(chloroplast);GO:0016021(integral component of membrane)	-1.4236	down	yes
TRINITY_DN13299_c0_g2	TRINITY_DN13299_c0_g2_i1	GO:0016787(hydrolase activity)	-1.42479	down	yes
TRINITY_DN14016_c0_g3	TRINITY_DN14016_c0_g3_i1;TRINITY_DN14016_c0_g3_i2	GO:0009813(flavonoid biosynthetic process);GO:0043231(intracellular membrane-bounded organelle);GO:0052696(flavonoid glucuronidation);GO:0080043(quercetin 3-O-glucosyltransferase activity);GO:0080044(quercetin 7-O-glucosyltransferase activity)	-1.43183	down	yes
TRINITY_DN8873_c0_g1	TRINITY_DN8873_c0_g1_i1;TRINITY_DN8873_c0_g1_i2;TRINITY_DN8873_c0_g1_i3	GO:0005575(cellular_component);GO:0008150(biological_process)	-1.43865	down	yes
TRINITY_DN9400_c0_g1	TRINITY_DN9400_c0_g1_i1;TRINITY_DN9400_c0_g1_i2	GO:0005739(mitochondrion);GO:0005743(mitochondrial inner membrane);GO:0005886(plasma membrane);GO:0016021(integral component of membrane);GO:0017004(cytochrome complex assembly);GO:0018063(cytochrome c-heme linkage);GO:0020037(heme binding)	-1.4431	down	yes
TRINITY_DN16475_c0_g1	TRINITY_DN16475_c0_g1_i1;TRINITY_DN16475_c0_g1_i2;TRINITY_DN16475_c0_g1_i3;TRINITY_DN16475_c0_g1_i4;TRINITY_DN16475_c0_g1_i5	-	-1.44438	down	yes
TRINITY_DN12030_c0_g4	TRINITY_DN12030_c0_g4_i1	GO:0003674(molecular_function);GO:0005634(nucleus);GO:0008150(biological_process)	-1.44445	down	yes
TRINITY_DN14306_c0_g6	TRINITY_DN14306_c0_g6_i1;TRINITY_DN14306_c0_g6_i2	-	-1.44802	down	yes
TRINITY_DN11042_c0_g7	TRINITY_DN11042_c0_g7_i1	-	-1.45149	down	yes
TRINITY_DN13597_c1_g7	TRINITY_DN13597_c1_g7_i1;TRINITY_DN13597_c1_g7_i2	GO:0000103(sulfate assimilation);GO:0004604(phosphoadenylyl-sulfate reductase (thioredoxin) activity);GO:0009507(chloroplast);GO:0009534(chloroplast thylakoid);GO:0009570(chloroplast stroma);GO:0009973(adenylyl-sulfate reductase activity);GO:0016671(oxidoreductase activity, acting on a sulfur group of donors, disulfide as acceptor);GO:0019344(cysteine biosynthetic process);GO:0019379(sulfate assi…	-1.46484	down	yes
TRINITY_DN10452_c0_g4	TRINITY_DN10452_c0_g4_i1;TRINITY_DN10452_c0_g4_i2;TRINITY_DN10452_c0_g4_i3;TRINITY_DN10452_c0_g4_i4	GO:0004553(hydrolase activity, hydrolyzing O-glycosyl compounds);GO:0005618(cell wall);GO:0010411(xyloglucan metabolic process);GO:0016762(xyloglucan:xyloglucosyl transferase activity);GO:0016798(hydrolase activity, acting on glycosyl bonds);GO:0042546(cell wall biogenesis);GO:0048046(apoplast);GO:0071555(cell wall organization)	-1.46613	down	yes
TRINITY_DN10402_c0_g2	TRINITY_DN10402_c0_g2_i1;TRINITY_DN10402_c0_g2_i2;TRINITY_DN10402_c0_g2_i3	GO:0004864(protein phosphatase inhibitor activity);GO:0005634(nucleus);GO:0005737(cytoplasm);GO:0009738(abscisic acid-activated signaling pathway);GO:0010427(abscisic acid binding);GO:0080163(regulation of protein serine/threonine phosphatase activity)	-1.47211	down	yes
TRINITY_DN14102_c0_g3	TRINITY_DN14102_c0_g3_i1	GO:0002229(defense response to oomycetes);GO:0009507(chloroplast);GO:0009536(plastid);GO:0016021(integral component of membrane);GO:0031969(chloroplast membrane);GO:0034635(glutathione transport);GO:0046686(response to cadmium ion)	-1.49045	down	yes
TRINITY_DN12725_c1_g2	TRINITY_DN12725_c1_g2_i1	-	-1.49242	down	yes
TRINITY_DN13055_c1_g4	TRINITY_DN13055_c1_g4_i1	GO:0005886(plasma membrane);GO:0016301(kinase activity);GO:0016310(phosphorylation)	-1.49915	down	yes
TRINITY_DN14010_c0_g1	TRINITY_DN14010_c0_g1_i1;TRINITY_DN14010_c0_g1_i2;TRINITY_DN14010_c0_g1_i3;TRINITY_DN14010_c0_g1_i4	GO:0005773(vacuole);GO:0005887(integral component of plasma membrane);GO:0009506(plasmodesma);GO:0009992(cellular water homeostasis);GO:0015250(water channel activity);GO:0015254(glycerol channel activity);GO:0034220(ion transmembrane transport)	-1.49973	down	yes
TRINITY_DN15227_c0_g4	TRINITY_DN15227_c0_g4_i1	GO:0003674(molecular_function);GO:0005739(mitochondrion);GO:0005774(vacuolar membrane);GO:0005886(plasma membrane);GO:0016021(integral component of membrane)	-1.51211	down	yes
TRINITY_DN16461_c0_g1	TRINITY_DN16461_c0_g1_i1;TRINITY_DN16461_c0_g1_i2;TRINITY_DN16461_c0_g1_i3	GO:0004022(alcohol dehydrogenase (NAD) activity);GO:0005737(cytoplasm);GO:0008270(zinc ion binding);GO:0055114(oxidation-reduction process)	-1.51595	down	yes
TRINITY_DN14944_c0_g7	TRINITY_DN14944_c0_g7_i1	-	-1.51905	down	yes
TRINITY_DN11359_c0_g4	TRINITY_DN11359_c0_g4_i1	GO:0003676(nucleic acid binding);GO:0003677(DNA binding);GO:0003700(DNA binding transcription factor activity);GO:0005634(nucleus);GO:0005886(plasma membrane);GO:0006355(regulation of transcription, DNA-templated);GO:0006979(response to oxidative stress);GO:0046872(metal ion binding)	-1.52058	down	yes
TRINITY_DN11842_c0_g2	TRINITY_DN11842_c0_g2_i1;TRINITY_DN11842_c0_g2_i2;TRINITY_DN11842_c0_g2_i3	GO:0004197(cysteine-type endopeptidase activity);GO:0004222(metalloendopeptidase activity);GO:0030176(integral component of endoplasmic reticulum membrane);GO:0071586(CAAX-box protein processing)	-1.5223	down	yes
TRINITY_DN14719_c1_g1	TRINITY_DN14719_c1_g1_i1;TRINITY_DN14719_c1_g1_i10;TRINITY_DN14719_c1_g1_i11;TRINITY_DN14719_c1_g1_i2;TRINITY_DN14719_c1_g1_i3;TRINITY_DN14719_c1_g1_i4;TRINITY_DN14719_c1_g1_i5;TRINITY_DN14719_c1_g1_i6;TRINITY_DN14719_c1_g1_i7;TRINITY_DN14719_c1_g1_i8;TRINITY_DN14719_c1_g1_i9	GO:0002094(polyprenyltransferase activity);GO:0005829(cytosol);GO:0006486(protein glycosylation);GO:0009507(chloroplast);GO:0009570(chloroplast stroma);GO:0009668(plastid membrane organization);GO:0016094(polyprenol biosynthetic process);GO:0019408(dolichol biosynthetic process);GO:0045547(dehydrodolichyl diphosphate synthase activity)	-1.52237	down	yes
TRINITY_DN13510_c0_g3	TRINITY_DN13510_c0_g3_i1;TRINITY_DN13510_c0_g3_i2;TRINITY_DN13510_c0_g3_i3	GO:0005576(extracellular region);GO:0005618(cell wall);GO:0009408(response to heat);GO:0009506(plasmodesma);GO:0009739(response to gibberellin);GO:0009740(gibberellic acid mediated signaling pathway);GO:0009751(response to salicylic acid);GO:0010286(heat acclimation)	-1.52603	down	yes
TRINITY_DN11557_c0_g6	TRINITY_DN11557_c0_g6_i1	GO:0005515(protein binding);GO:0005634(nucleus);GO:0008150(biological_process)	-1.53513	down	yes
TRINITY_DN14031_c0_g5	TRINITY_DN14031_c0_g5_i1	GO:0004012(phospholipid-translocating ATPase activity);GO:0005802(trans-Golgi network);GO:0005886(plasma membrane);GO:0048194(Golgi vesicle budding)	-1.54311	down	yes
TRINITY_DN9719_c0_g1	TRINITY_DN9719_c0_g1_i1	-	-1.55481	down	yes
TRINITY_DN9591_c0_g1	TRINITY_DN9591_c0_g1_i1;TRINITY_DN9591_c0_g1_i2	-	-1.55719	down	yes
TRINITY_DN14030_c0_g1	TRINITY_DN14030_c0_g1_i1;TRINITY_DN14030_c0_g1_i2;TRINITY_DN14030_c0_g1_i3;TRINITY_DN14030_c0_g1_i4	GO:0003674(molecular_function);GO:0005575(cellular_component);GO:0008150(biological_process);GO:0009570(chloroplast stroma);GO:0043036(starch grain);GO:2000904(regulation of starch metabolic process);GO:2001070(starch binding)	-1.55945	down	yes
TRINITY_DN14041_c0_g4	TRINITY_DN14041_c0_g4_i1;TRINITY_DN14041_c0_g4_i2;TRINITY_DN14041_c0_g4_i3	GO:0003700(DNA binding transcription factor activity);GO:0005515(protein binding);GO:0005634(nucleus);GO:0006351(transcription, DNA-templated);GO:0006355(regulation of transcription, DNA-templated);GO:0009733(response to auxin);GO:0009734(auxin-activated signaling pathway)	-1.55976	down	yes
TRINITY_DN13397_c0_g5	TRINITY_DN13397_c0_g5_i1	GO:0009705(plant-type vacuole membrane);GO:0016021(integral component of membrane)	-1.56232	down	yes
TRINITY_DN14236_c1_g11	TRINITY_DN14236_c1_g11_i1;TRINITY_DN14236_c1_g11_i2;TRINITY_DN14236_c1_g11_i3	GO:0003723(RNA binding);GO:0003964(RNA-directed DNA polymerase activity);GO:0006278(RNA-dependent DNA biosynthetic process);GO:0009267(cellular response to starvation);GO:0036170(filamentous growth of a population of unicellular organisms in response to starvation);GO:0036180(filamentous growth of a population of unicellular organisms in response to biotic stimulus);GO:0071216(cellular response t…	-1.56437	down	yes
TRINITY_DN1159_c0_g1	TRINITY_DN1159_c0_g1_i1	-	-1.57193	down	yes
TRINITY_DN11223_c0_g6	TRINITY_DN11223_c0_g6_i1	GO:0051213(dioxygenase activity)	-1.57643	down	yes
TRINITY_DN15537_c0_g2	TRINITY_DN15537_c0_g2_i1;TRINITY_DN15537_c0_g2_i2;TRINITY_DN15537_c0_g2_i3	-	-1.57857	down	yes
TRINITY_DN16421_c0_g2	TRINITY_DN16421_c0_g2_i1;TRINITY_DN16421_c0_g2_i2;TRINITY_DN16421_c0_g2_i3;TRINITY_DN16421_c0_g2_i4	-	-1.5791	down	yes
TRINITY_DN12320_c0_g4	TRINITY_DN12320_c0_g4_i1	GO:0003700(DNA binding transcription factor activity);GO:0005634(nucleus);GO:0043565(sequence-specific DNA binding);GO:0044212(transcription regulatory region DNA binding)	-1.58025	down	yes
TRINITY_DN15495_c0_g3	TRINITY_DN15495_c0_g3_i1;TRINITY_DN15495_c0_g3_i2;TRINITY_DN15495_c0_g3_i3;TRINITY_DN15495_c0_g3_i4;TRINITY_DN15495_c0_g3_i5;TRINITY_DN15495_c0_g3_i6;TRINITY_DN15495_c0_g3_i7	GO:0007275(multicellular organism development);GO:0010268(brassinosteroid homeostasis);GO:0010295((+)-abscisic acid 8'-hydroxylase activity);GO:0016125(sterol metabolic process);GO:0016132(brassinosteroid biosynthetic process)	-1.58136	down	yes
TRINITY_DN14070_c0_g5	TRINITY_DN14070_c0_g5_i1;TRINITY_DN14070_c0_g5_i2	-	-1.58299	down	yes
TRINITY_DN11853_c0_g3	TRINITY_DN11853_c0_g3_i1	-	-1.58648	down	yes
TRINITY_DN11344_c0_g5	TRINITY_DN11344_c0_g5_i1;TRINITY_DN11344_c0_g5_i2	GO:0003674(molecular_function);GO:0005634(nucleus);GO:0008150(biological_process)	-1.59117	down	yes
TRINITY_DN10758_c1_g3	TRINITY_DN10758_c1_g3_i1;TRINITY_DN10758_c1_g3_i2;TRINITY_DN10758_c1_g3_i3;TRINITY_DN10758_c1_g3_i4	-	-1.59529	down	yes
TRINITY_DN12054_c2_g2	TRINITY_DN12054_c2_g2_i1;TRINITY_DN12054_c2_g2_i2	-	-1.60262	down	yes
TRINITY_DN12054_c2_g1	TRINITY_DN12054_c2_g1_i1	-	-1.60588	down	yes
TRINITY_DN10204_c0_g1	TRINITY_DN10204_c0_g1_i1;TRINITY_DN10204_c0_g1_i2;TRINITY_DN10204_c0_g1_i3	GO:0005215(transporter activity);GO:0005634(nucleus);GO:0006810(transport)	-1.61618	down	yes
TRINITY_DN15968_c0_g4	TRINITY_DN15968_c0_g4_i1	GO:0004857(enzyme inhibitor activity)	-1.61618	down	yes
TRINITY_DN11807_c1_g7	TRINITY_DN11807_c1_g7_i1;TRINITY_DN11807_c1_g7_i2;TRINITY_DN11807_c1_g7_i3	GO:0003674(molecular_function);GO:0005634(nucleus);GO:0005739(mitochondrion);GO:0005819(spindle);GO:0005874(microtubule);GO:0032147(activation of protein kinase activity);GO:0060236(regulation of mitotic spindle organization)	-1.62869	down	yes
TRINITY_DN12715_c0_g3	TRINITY_DN12715_c0_g3_i1;TRINITY_DN12715_c0_g3_i2;TRINITY_DN12715_c0_g3_i3;TRINITY_DN12715_c0_g3_i4	GO:0004693(cyclin-dependent protein serine/threonine kinase activity);GO:0005515(protein binding);GO:0005634(nucleus);GO:0007049(cell cycle);GO:0051301(cell division);GO:0051726(regulation of cell cycle)	-1.62884	down	yes
TRINITY_DN16392_c0_g1	TRINITY_DN16392_c0_g1_i1;TRINITY_DN16392_c0_g1_i10;TRINITY_DN16392_c0_g1_i2;TRINITY_DN16392_c0_g1_i3;TRINITY_DN16392_c0_g1_i4;TRINITY_DN16392_c0_g1_i5;TRINITY_DN16392_c0_g1_i6;TRINITY_DN16392_c0_g1_i7;TRINITY_DN16392_c0_g1_i8;TRINITY_DN16392_c0_g1_i9	-	-1.63131	down	yes
TRINITY_DN12703_c0_g7	TRINITY_DN12703_c0_g7_i1	GO:0005515(protein binding);GO:0005634(nucleus);GO:0008150(biological_process)	-1.64305	down	yes
TRINITY_DN14911_c1_g2	TRINITY_DN14911_c1_g2_i1;TRINITY_DN14911_c1_g2_i2;TRINITY_DN14911_c1_g2_i3;TRINITY_DN14911_c1_g2_i4	GO:0003677(DNA binding);GO:0003700(DNA binding transcription factor activity);GO:0005634(nucleus);GO:0006351(transcription, DNA-templated);GO:0006355(regulation of transcription, DNA-templated);GO:0007275(multicellular organism development);GO:0009734(auxin-activated signaling pathway);GO:0010072(primary shoot apical meristem specification);GO:0048527(lateral root development)	-1.64334	down	yes
TRINITY_DN11159_c0_g1	TRINITY_DN11159_c0_g1_i1;TRINITY_DN11159_c0_g1_i2;TRINITY_DN11159_c0_g1_i3	-	-1.65556	down	yes
TRINITY_DN14048_c0_g1	TRINITY_DN14048_c0_g1_i1;TRINITY_DN14048_c0_g1_i2	GO:0003333(amino acid transmembrane transport);GO:0005886(plasma membrane);GO:0015171(amino acid transmembrane transporter activity)	-1.67734	down	yes
TRINITY_DN11408_c0_g5	TRINITY_DN11408_c0_g5_i1	GO:0005515(protein binding);GO:0005634(nucleus);GO:0016301(kinase activity);GO:0016310(phosphorylation)	-1.67942	down	yes
TRINITY_DN11227_c1_g2	TRINITY_DN11227_c1_g2_i1;TRINITY_DN11227_c1_g2_i2;TRINITY_DN11227_c1_g2_i3;TRINITY_DN11227_c1_g2_i4;TRINITY_DN11227_c1_g2_i5;TRINITY_DN11227_c1_g2_i6	GO:0005575(cellular_component);GO:0008150(biological_process)	-1.69235	down	yes
TRINITY_DN15429_c0_g1	TRINITY_DN15429_c0_g1_i1;TRINITY_DN15429_c0_g1_i2;TRINITY_DN15429_c0_g1_i3;TRINITY_DN15429_c0_g1_i4;TRINITY_DN15429_c0_g1_i5;TRINITY_DN15429_c0_g1_i6;TRINITY_DN15429_c0_g1_i7;TRINITY_DN15429_c0_g1_i8	GO:0010143(cutin biosynthetic process);GO:0016020(membrane);GO:0016311(dephosphorylation);GO:0016791(phosphatase activity);GO:0090447(glycerol-3-phosphate 2-O-acyltransferase activity)	-1.69622	down	yes
TRINITY_DN11886_c1_g5	TRINITY_DN11886_c1_g5_i1;TRINITY_DN11886_c1_g5_i2	-	-1.70536	down	yes
TRINITY_DN11728_c0_g2	TRINITY_DN11728_c0_g2_i1;TRINITY_DN11728_c0_g2_i2;TRINITY_DN11728_c0_g2_i3;TRINITY_DN11728_c0_g2_i4;TRINITY_DN11728_c0_g2_i5;TRINITY_DN11728_c0_g2_i6;TRINITY_DN11728_c0_g2_i7;TRINITY_DN11728_c0_g2_i8	-	-1.70787	down	yes
TRINITY_DN11274_c0_g4	TRINITY_DN11274_c0_g4_i1;TRINITY_DN11274_c0_g4_i2	-	-1.73742	down	yes
TRINITY_DN11566_c0_g1	TRINITY_DN11566_c0_g1_i1;TRINITY_DN11566_c0_g1_i2;TRINITY_DN11566_c0_g1_i3	GO:0005737(cytoplasm);GO:0030001(metal ion transport);GO:0046914(transition metal ion binding);GO:0046916(cellular transition metal ion homeostasis)	-1.74068	down	yes
TRINITY_DN10414_c0_g1	TRINITY_DN10414_c0_g1_i1	GO:0003674(molecular_function);GO:0005634(nucleus);GO:0006865(amino acid transport);GO:0009615(response to virus);GO:0016021(integral component of membrane);GO:0019048(modulation by virus of host morphology or physiology);GO:0032940(secretion by cell);GO:0080143(regulation of amino acid export)	-1.74079	down	yes
TRINITY_DN15641_c0_g2	TRINITY_DN15641_c0_g2_i1;TRINITY_DN15641_c0_g2_i2;TRINITY_DN15641_c0_g2_i3;TRINITY_DN15641_c0_g2_i4;TRINITY_DN15641_c0_g2_i5	GO:0001228(transcriptional activator activity, RNA polymerase II transcription regulatory region sequence-specific DNA binding);GO:0003677(DNA binding);GO:0003700(DNA binding transcription factor activity);GO:0005515(protein binding);GO:0005634(nucleus);GO:0006351(transcription, DNA-templated);GO:0006355(regulation of transcription, DNA-templated);GO:0042802(identical protein binding);GO:0046982(…	-1.75123	down	yes
TRINITY_DN15987_c0_g1	TRINITY_DN15987_c0_g1_i1;TRINITY_DN15987_c0_g1_i2;TRINITY_DN15987_c0_g1_i3;TRINITY_DN15987_c0_g1_i4;TRINITY_DN15987_c0_g1_i5;TRINITY_DN15987_c0_g1_i6;TRINITY_DN15987_c0_g1_i7	GO:0005524(ATP binding);GO:0005634(nucleus);GO:0005829(cytosol);GO:0006090(pyruvate metabolic process);GO:0009507(chloroplast);GO:0009570(chloroplast stroma);GO:0015979(photosynthesis);GO:0016301(kinase activity);GO:0016310(phosphorylation);GO:0046872(metal ion binding);GO:0050242(pyruvate, phosphate dikinase activity)	-1.7584	down	yes
TRINITY_DN13252_c1_g9	TRINITY_DN13252_c1_g9_i1	GO:0005515(protein binding);GO:0005634(nucleus);GO:0005737(cytoplasm);GO:0009864(induced systemic resistance, jasmonic acid mediated signaling pathway);GO:0009944(polarity specification of adaxial/abaxial axis);GO:0009954(proximal/distal pattern formation);GO:0010227(floral organ abscission);GO:0010254(nectary development);GO:0010434(bract formation);GO:0010582(floral meristem determinacy);GO:001…	-1.76318	down	yes
TRINITY_DN13289_c0_g3	TRINITY_DN13289_c0_g3_i1	GO:0004866(endopeptidase inhibitor activity);GO:0005576(extracellular region);GO:0005618(cell wall);GO:0048046(apoplast)	-1.78717	down	yes
TRINITY_DN11951_c0_g3	TRINITY_DN11951_c0_g3_i1;TRINITY_DN11951_c0_g3_i2;TRINITY_DN11951_c0_g3_i3	-	-1.79681	down	yes
TRINITY_DN12007_c0_g1	TRINITY_DN12007_c0_g1_i1;TRINITY_DN12007_c0_g1_i2	-	-1.79742	down	yes
TRINITY_DN11690_c0_g2	TRINITY_DN11690_c0_g2_i1	GO:0005576(extracellular region);GO:0005773(vacuole);GO:0008150(biological_process)	-1.80577	down	yes
TRINITY_DN10525_c0_g1	TRINITY_DN10525_c0_g1_i1	GO:0003677(DNA binding);GO:0003700(DNA binding transcription factor activity);GO:0005515(protein binding);GO:0005634(nucleus);GO:0005737(cytoplasm);GO:0006351(transcription, DNA-templated);GO:0006355(regulation of transcription, DNA-templated);GO:0034605(cellular response to heat);GO:0043565(sequence-specific DNA binding);GO:0046686(response to cadmium ion)	-1.83254	down	yes
TRINITY_DN11838_c0_g2	TRINITY_DN11838_c0_g2_i1;TRINITY_DN11838_c0_g2_i2;TRINITY_DN11838_c0_g2_i3	GO:0004842(ubiquitin-protein transferase activity);GO:0005515(protein binding);GO:0005789(endoplasmic reticulum membrane);GO:0006970(response to osmotic stress);GO:0009409(response to cold);GO:0009414(response to water deprivation);GO:0009611(response to wounding);GO:0009723(response to ethylene);GO:0016567(protein ubiquitination);GO:0043161(proteasome-mediated ubiquitin-dependent protein catabol…	-1.83463	down	yes
TRINITY_DN13681_c0_g3	TRINITY_DN13681_c0_g3_i1;TRINITY_DN13681_c0_g3_i2	GO:0005576(extracellular region);GO:0005794(Golgi apparatus);GO:0007275(multicellular organism development);GO:0008083(growth factor activity);GO:0008283(cell proliferation);GO:0030154(cell differentiation);GO:0031012(extracellular matrix);GO:1905392(plant organ morphogenesis)	-1.83502	down	yes
TRINITY_DN13106_c1_g2	TRINITY_DN13106_c1_g2_i1;TRINITY_DN13106_c1_g2_i10;TRINITY_DN13106_c1_g2_i11;TRINITY_DN13106_c1_g2_i2;TRINITY_DN13106_c1_g2_i3;TRINITY_DN13106_c1_g2_i4;TRINITY_DN13106_c1_g2_i5;TRINITY_DN13106_c1_g2_i6;TRINITY_DN13106_c1_g2_i7;TRINITY_DN13106_c1_g2_i8;TRINITY_DN13106_c1_g2_i9	GO:0003824(catalytic activity);GO:0005774(vacuolar membrane);GO:0005829(cytosol);GO:0005975(carbohydrate metabolic process);GO:0009051(pentose-phosphate shunt, oxidative branch);GO:0009507(chloroplast);GO:0017057(6-phosphogluconolactonase activity)	-1.87231	down	yes
TRINITY_DN15844_c0_g1	TRINITY_DN15844_c0_g1_i1;TRINITY_DN15844_c0_g1_i2	GO:0003674(molecular_function);GO:0005739(mitochondrion);GO:0009409(response to cold);GO:0009414(response to water deprivation);GO:0009507(chloroplast);GO:0009631(cold acclimation);GO:0009737(response to abscisic acid);GO:0009793(embryo development ending in seed dormancy)	-1.8745	down	yes
TRINITY_DN16015_c0_g3	TRINITY_DN16015_c0_g3_i1;TRINITY_DN16015_c0_g3_i2	GO:0003674(molecular_function);GO:0005576(extracellular region);GO:0009505(plant-type cell wall);GO:0009506(plasmodesma);GO:0051707(response to other organism)	-1.89702	down	yes
TRINITY_DN13947_c0_g1	TRINITY_DN13947_c0_g1_i1	GO:0034219(carbohydrate transmembrane transport)	-1.90483	down	yes
TRINITY_DN11419_c0_g2	TRINITY_DN11419_c0_g2_i1;TRINITY_DN11419_c0_g2_i2;TRINITY_DN11419_c0_g2_i3	GO:0005634(nucleus);GO:0009651(response to salt stress);GO:0016874(ligase activity)	-1.9111	down	yes
TRINITY_DN11502_c0_g4	TRINITY_DN11502_c0_g4_i1	-	-1.91848	down	yes
TRINITY_DN15339_c1_g2	TRINITY_DN15339_c1_g2_i1;TRINITY_DN15339_c1_g2_i2	-	-1.92231	down	yes
TRINITY_DN12222_c0_g4	TRINITY_DN12222_c0_g4_i1;TRINITY_DN12222_c0_g4_i2	GO:0003863(3-methyl-2-oxobutanoate dehydrogenase (2-methylpropanoyl-transferring) activity);GO:0005739(mitochondrion);GO:0005759(mitochondrial matrix);GO:0009646(response to absence of light);GO:0009744(response to sucrose);GO:0016021(integral component of membrane);GO:0016624(oxidoreductase activity, acting on the aldehyde or oxo group of donors, disulfide as acceptor);GO:0043617(cellular respon…	-1.92347	down	yes
TRINITY_DN12612_c0_g5	TRINITY_DN12612_c0_g5_i1	GO:0003674(molecular_function);GO:0005737(cytoplasm);GO:0006952(defense response);GO:0009607(response to biotic stimulus)	-1.95361	down	yes
TRINITY_DN15513_c0_g14	TRINITY_DN15513_c0_g14_i1	GO:0003674(molecular_function);GO:0005575(cellular_component);GO:0008150(biological_process)	-1.96592	down	yes
TRINITY_DN10697_c0_g1	TRINITY_DN10697_c0_g1_i1;TRINITY_DN10697_c0_g1_i2;TRINITY_DN10697_c0_g1_i3;TRINITY_DN10697_c0_g1_i4	-	-1.97524	down	yes
TRINITY_DN14703_c1_g7	TRINITY_DN14703_c1_g7_i1	GO:0005634(nucleus);GO:0008150(biological_process);GO:0008483(transaminase activity)	-1.98608	down	yes
TRINITY_DN9757_c0_g1	TRINITY_DN9757_c0_g1_i1;TRINITY_DN9757_c0_g1_i2	GO:0003674(molecular_function);GO:0005634(nucleus);GO:0010224(response to UV-B)	-1.99032	down	yes
TRINITY_DN15482_c1_g6	TRINITY_DN15482_c1_g6_i1	GO:0003735(structural constituent of ribosome);GO:0015934(large ribosomal subunit)	-1.99479	down	yes
TRINITY_DN11628_c0_g4	TRINITY_DN11628_c0_g4_i1;TRINITY_DN11628_c0_g4_i2;TRINITY_DN11628_c0_g4_i3;TRINITY_DN11628_c0_g4_i4	GO:0009044(xylan 1,4-beta-xylosidase activity);GO:0009505(plant-type cell wall);GO:0031222(arabinan catabolic process);GO:0045493(xylan catabolic process);GO:0046556(alpha-L-arabinofuranosidase activity)	-2.00613	down	yes
TRINITY_DN10612_c0_g1	TRINITY_DN10612_c0_g1_i1	GO:0005737(cytoplasm);GO:0005886(plasma membrane);GO:0008270(zinc ion binding);GO:0008898(S-adenosylmethionine-homocysteine S-methyltransferase activity);GO:0009086(methionine biosynthetic process);GO:0032259(methylation);GO:0047150(betaine-homocysteine S-methyltransferase activity)	-2.02591	down	yes
TRINITY_DN9647_c0_g1	TRINITY_DN9647_c0_g1_i1	GO:0005375(copper ion transmembrane transporter activity);GO:0005770(late endosome);GO:0005773(vacuole);GO:0005774(vacuolar membrane);GO:0005794(Golgi apparatus);GO:0006825(copper ion transport);GO:0009506(plasmodesma);GO:0009737(response to abscisic acid);GO:0015089(high-affinity copper ion transmembrane transporter activity);GO:0015680(intracellular copper ion transport);GO:0016021(integral com…	-2.04771	down	yes
TRINITY_DN11653_c1_g2	TRINITY_DN11653_c1_g2_i1	GO:0016020(membrane);GO:0016709(oxidoreductase activity, acting on paired donors, with incorporation or reduction of molecular oxygen, NAD(P)H as one donor, and incorporation of one atom of oxygen);GO:0044550(secondary metabolite biosynthetic process)	-2.09621	down	yes
TRINITY_DN11175_c1_g9	TRINITY_DN11175_c1_g9_i1	GO:0005634(nucleus);GO:0005737(cytoplasm)	-2.10145	down	yes
TRINITY_DN9797_c0_g1	TRINITY_DN9797_c0_g1_i1	GO:0005737(cytoplasm);GO:0005773(vacuole);GO:0005774(vacuolar membrane);GO:0005887(integral component of plasma membrane);GO:0006810(transport);GO:0009507(chloroplast);GO:0009705(plant-type vacuole membrane);GO:0015250(water channel activity);GO:0016020(membrane);GO:0033554(cellular response to stress);GO:0034220(ion transmembrane transport);GO:0042807(central vacuole)	-2.11163	down	yes
TRINITY_DN12266_c3_g6	TRINITY_DN12266_c3_g6_i1	-	-2.13741	down	yes
TRINITY_DN11993_c0_g6	TRINITY_DN11993_c0_g6_i1	GO:0000166(nucleotide binding);GO:0001666(response to hypoxia);GO:0004022(alcohol dehydrogenase (NAD) activity);GO:0005737(cytoplasm);GO:0005794(Golgi apparatus);GO:0005829(cytosol);GO:0005886(plasma membrane);GO:0006970(response to osmotic stress);GO:0008270(zinc ion binding);GO:0009409(response to cold);GO:0009413(response to flooding);GO:0009414(response to water deprivation);GO:0009651(respon…	-2.15063	down	yes
TRINITY_DN9614_c0_g1	TRINITY_DN9614_c0_g1_i1	GO:0003674(molecular_function);GO:0005634(nucleus);GO:0008150(biological_process)	-2.15322	down	yes
TRINITY_DN14320_c0_g1	TRINITY_DN14320_c0_g1_i1;TRINITY_DN14320_c0_g1_i2;TRINITY_DN14320_c0_g1_i3;TRINITY_DN14320_c0_g1_i4	GO:0003674(molecular_function);GO:0005737(cytoplasm);GO:0005829(cytosol);GO:0008150(biological_process)	-2.23674	down	yes
TRINITY_DN11502_c0_g5	TRINITY_DN11502_c0_g5_i1;TRINITY_DN11502_c0_g5_i2;TRINITY_DN11502_c0_g5_i3	GO:0004672(protein kinase activity);GO:0005524(ATP binding);GO:0005576(extracellular region);GO:0005618(cell wall);GO:0006468(protein phosphorylation);GO:0009505(plant-type cell wall);GO:0009737(response to abscisic acid);GO:0009739(response to gibberellin);GO:0009740(gibberellic acid mediated signaling pathway);GO:0009741(response to brassinosteroid);GO:0009826(unidimensional cell growth);GO:001…	-2.33288	down	yes
TRINITY_DN10414_c0_g2	TRINITY_DN10414_c0_g2_i1	GO:0003674(molecular_function);GO:0005634(nucleus);GO:0006865(amino acid transport);GO:0009615(response to virus);GO:0016021(integral component of membrane);GO:0019048(modulation by virus of host morphology or physiology);GO:0032940(secretion by cell);GO:0080143(regulation of amino acid export)	-2.35852	down	yes
TRINITY_DN16015_c1_g3	TRINITY_DN16015_c1_g3_i1;TRINITY_DN16015_c1_g3_i2	GO:0005524(ATP binding);GO:0005618(cell wall);GO:0005634(nucleus);GO:0009409(response to cold);GO:0009416(response to light stimulus);GO:0009507(chloroplast);GO:0009535(chloroplast thylakoid membrane);GO:0009570(chloroplast stroma);GO:0009579(thylakoid);GO:0009753(response to jasmonic acid);GO:0009941(chloroplast envelope);GO:0010150(leaf senescence);GO:0010287(plastoglobule);GO:0010319(stromule)…	-2.3636	down	yes
TRINITY_DN12422_c2_g6	TRINITY_DN12422_c2_g6_i1;TRINITY_DN12422_c2_g6_i2	GO:0004568(chitinase activity);GO:0050832(defense response to fungus)	-2.41262	down	yes
TRINITY_DN15193_c0_g3	TRINITY_DN15193_c0_g3_i1;TRINITY_DN15193_c0_g3_i2	GO:0005576(extracellular region);GO:0005618(cell wall);GO:0006949(syncytium formation);GO:0009505(plant-type cell wall);GO:0009664(plant-type cell wall organization);GO:0009739(response to gibberellin);GO:0009826(unidimensional cell growth);GO:0009828(plant-type cell wall loosening);GO:0010114(response to red light);GO:0010119(regulation of stomatal movement);GO:0016020(membrane)	-2.52729	down	yes
TRINITY_DN15786_c0_g1	TRINITY_DN15786_c0_g1_i1;TRINITY_DN15786_c0_g1_i2;TRINITY_DN15786_c0_g1_i3;TRINITY_DN15786_c0_g1_i4;TRINITY_DN15786_c0_g1_i5;TRINITY_DN15786_c0_g1_i6;TRINITY_DN15786_c0_g1_i7;TRINITY_DN15786_c0_g1_i8	GO:0005515(protein binding)	-2.54218	down	yes
TRINITY_DN11621_c0_g6	TRINITY_DN11621_c0_g6_i1	GO:0005886(plasma membrane);GO:0016021(integral component of membrane);GO:0042626(ATPase activity, coupled to transmembrane movement of substances)	-2.60613	down	yes
TRINITY_DN11744_c0_g3	TRINITY_DN11744_c0_g3_i1	-	-2.65921	down	yes
TRINITY_DN16509_c1_g1	TRINITY_DN16509_c1_g1_i1;TRINITY_DN16509_c1_g1_i10;TRINITY_DN16509_c1_g1_i2;TRINITY_DN16509_c1_g1_i3;TRINITY_DN16509_c1_g1_i4;TRINITY_DN16509_c1_g1_i5;TRINITY_DN16509_c1_g1_i6;TRINITY_DN16509_c1_g1_i7;TRINITY_DN16509_c1_g1_i8;TRINITY_DN16509_c1_g1_i9	-	-2.67291	down	yes
TRINITY_DN15497_c1_g5	TRINITY_DN15497_c1_g5_i1	GO:0003674(molecular_function);GO:0005576(extracellular region);GO:0009739(response to gibberellin)	-2.69298	down	yes
TRINITY_DN14725_c1_g2	TRINITY_DN14725_c1_g2_i1;TRINITY_DN14725_c1_g2_i2;TRINITY_DN14725_c1_g2_i3;TRINITY_DN14725_c1_g2_i4;TRINITY_DN14725_c1_g2_i5;TRINITY_DN14725_c1_g2_i6	-	-2.76368	down	yes
TRINITY_DN10807_c0_g4	TRINITY_DN10807_c0_g4_i1;TRINITY_DN10807_c0_g4_i2;TRINITY_DN10807_c0_g4_i3	-	-2.78062	down	yes
TRINITY_DN15550_c1_g5	TRINITY_DN15550_c1_g5_i1	GO:0003723(RNA binding);GO:0003964(RNA-directed DNA polymerase activity);GO:0005737(cytoplasm);GO:0006278(RNA-dependent DNA biosynthetic process);GO:0015074(DNA integration)	-2.87751	down	yes
TRINITY_DN10983_c0_g1	TRINITY_DN10983_c0_g1_i1;TRINITY_DN10983_c0_g1_i2;TRINITY_DN10983_c0_g1_i3;TRINITY_DN10983_c0_g1_i4;TRINITY_DN10983_c0_g1_i5;TRINITY_DN10983_c0_g1_i6;TRINITY_DN10983_c0_g1_i7	GO:0003674(molecular_function);GO:0008150(biological_process)	-3.03341	down	yes
TRINITY_DN14247_c0_g1	TRINITY_DN14247_c0_g1_i1;TRINITY_DN14247_c0_g1_i2;TRINITY_DN14247_c0_g1_i3;TRINITY_DN14247_c0_g1_i4	GO:0005515(protein binding);GO:0009507(chloroplast);GO:0010287(plastoglobule);GO:0016702(oxidoreductase activity, acting on single donors with incorporation of molecular oxygen, incorporation of two atoms of oxygen);GO:0046872(metal ion binding);GO:0055114(oxidation-reduction process)	-3.24736	down	yes
TRINITY_DN15669_c0_g6	TRINITY_DN15669_c0_g6_i1;TRINITY_DN15669_c0_g6_i2	GO:0009555(pollen development);GO:0009860(pollen tube growth);GO:0010233(phloem transport);GO:0030410(nicotianamine synthase activity);GO:0030418(nicotianamine biosynthetic process)	-3.30275	down	yes
TRINITY_DN11913_c0_g4	TRINITY_DN11913_c0_g4_i1	GO:0000103(sulfate assimilation);GO:0006457(protein folding);GO:0009507(chloroplast);GO:0015035(protein disulfide oxidoreductase activity);GO:0016671(oxidoreductase activity, acting on a sulfur group of donors, disulfide as acceptor);GO:0034599(cellular response to oxidative stress);GO:0045454(cell redox homeostasis);GO:0055114(oxidation-reduction process)	-3.45445	down	yes
TRINITY_DN10686_c0_g4	TRINITY_DN10686_c0_g4_i1	GO:0005886(plasma membrane);GO:0006810(transport);GO:0022857(transmembrane transporter activity)	-3.492	down	yes
TRINITY_DN14088_c0_g3	TRINITY_DN14088_c0_g3_i1	-	-3.94896	down	yes
TRINITY_DN16572_c0_g1	TRINITY_DN16572_c0_g1_i1	-	-7.54299	down	yes
