# Supplementary material for: Chitosan oligosaccharide as a plant immune inducer on the Passiflora spp. (passion fruit) CMV disease
Source: Front Plant Sci. 2023 Feb 6;14:1131766. doi: 10.3389/fpls.2023.1131766 (PMC9939820; doi:10.3389/fpls.2023.1131766)
Supplement: Supplementary file 2 [file Table_2.xlsx]

## Sheet: Table S2
Gene_ID	Length	Trans_ID	Annotation	Name	swissprot_description	GO_Term	NOG	KOEntry	KODescription	EC	KEGG_Pathway	Pfam_description	Sig	SS
TRINITY_DN12218_c0_g1	1567	TRINITY_DN12218_c0_g1_i1	Succinyl-CoA synthetase, beta subunit [Trema orientale]	Os02g0621700	Succinate--CoA ligase [ADP-forming] subunit beta, mitochondrial OS=Oryza sativa subsp. japonica GN=Os02g0621700 PE=1 SV=1	GO:0004775(succinate-CoA ligase (ADP-forming) activity);GO:0004776(succinate-CoA ligase (GDP-forming) activity);GO:0005507(copper ion binding);GO:0005524(ATP binding);GO:0005739(mitochondrion);GO:0005794(Golgi apparatus);GO:0006099(tricarboxylic acid cycl	COG0045(Succinyl-CoA synthetase subunit beta)	K01900	succinyl-CoA synthetase beta subunit	EC:6.2.1.4 6.2.1.5	hbr00020(Citrate cycle (TCA cycle));hbr00640(Propanoate metabolism)	B9IBF2.1 PF08442.8;ATP-grasp_2;	no	no
TRINITY_DN12223_c0_g1	2094	TRINITY_DN12223_c0_g1_i1;TRINITY_DN12223_c0_g1_i2	methyl-CpG-binding domain-containing protein 11-like [Manihot esculenta]	MBD11	Methyl-CpG-binding domain-containing protein 11 OS=Arabidopsis thaliana GN=MBD11 PE=1 SV=1	GO:0003677(DNA binding);GO:0005634(nucleus);GO:0006351(transcription, DNA-templated);GO:0006355(regulation of transcription, DNA-templated);GO:0008327(methyl-CpG binding)	ENOG410YRVP(methyl-CpG binding)	-	-	-	-	A0A067KZ09.1 PF01429.17;MBD;	no	no
TRINITY_DN12224_c0_g4	1366	TRINITY_DN12224_c0_g4_i1	60S ribosomal protein L28-2 [Jatropha curcas]	RPL28A	60S ribosomal protein L28-1 OS=Arabidopsis thaliana GN=RPL28A PE=1 SV=1	GO:0003735(structural constituent of ribosome);GO:0006412(translation);GO:0022625(cytosolic large ribosomal subunit)	ENOG4111T32(protein complex subunit organization)	K02903	large subunit ribosomal protein L28e	-	jcu03010(Ribosome)	A9P8K5.1 PF01778.15;Ribosomal_L28e;	up	yes
TRINITY_DN12229_c1_g6	2868	TRINITY_DN12229_c1_g6_i1	uncharacterized protein LOC110635754 isoform X2 [Hevea brasiliensis]	-	-	GO:0003729(mRNA binding);GO:0005634(nucleus);GO:0005829(cytosol);GO:0008150(biological_process)	ENOG410YBXQ(Protein of unknown function (DUF1296))	NA	NA	NA	NA(NA)	A0A067KX76.1 PF06972.9;DUF1296;	no	no
TRINITY_DN12242_c0_g5	752	TRINITY_DN12242_c0_g5_i1	-	-	-	-	-	-	-	-	-	-	no	no
TRINITY_DN12248_c0_g4	811	TRINITY_DN12248_c0_g4_i1	nodulin-related protein 1 [Populus trichocarpa]	-	-	-	ENOG410ZPSX(NA)	-	-	-	-	-	no	no
TRINITY_DN12271_c0_g1	2603	TRINITY_DN12271_c0_g1_i1;TRINITY_DN12271_c0_g1_i10;TRINITY_DN12271_c0_g1_i11;TRINITY_DN12271_c0_g1_i12;TRINITY_DN12271_c0_g1_i13;TRINITY_DN12271_c0_g1_i14;TRINITY_DN12271_c0_g1_i15;TRINITY_DN12271_c0_g1_i16;TRINITY_DN12271_c0_g1_i17;TRINITY_DN12271_c0_g1_	peroxisomal membrane protein PEX14 isoform X2 [Jatropha curcas]	PEX14	Peroxisomal membrane protein PEX14 OS=Arabidopsis thaliana GN=PEX14 PE=1 SV=2	GO:0005102(receptor binding);GO:0005515(protein binding);GO:0005634(nucleus);GO:0005739(mitochondrion);GO:0005777(peroxisome);GO:0005778(peroxisomal membrane);GO:0005829(cytosol);GO:0005886(plasma membrane);GO:0006625(protein targeting to peroxisome);GO:0	ENOG4111P8A(peroxisomal biogenesis factor 14)	K13343	peroxin-14	-	jcu04146(Peroxisome)	U5FWZ4.1 PF04695.11;Pex14_N;	no	no
TRINITY_DN12284_c0_g2	2305	TRINITY_DN12284_c0_g2_i1;TRINITY_DN12284_c0_g2_i2;TRINITY_DN12284_c0_g2_i3	PREDICTED: dynamin-related protein 5A [Populus euphratica]	-	Dynamin-related protein 5A OS=Glycine max PE=2 SV=1	GO:0005515(protein binding)	COG0699(Dynamin family)	K01528	dynamin GTPase	EC:3.6.5.5	nnu04144(Endocytosis)	V4TLN0.1 PF01031.18;Dynamin_M;	no	no
TRINITY_DN12311_c0_g3	1908	TRINITY_DN12311_c0_g3_i1;TRINITY_DN12311_c0_g3_i2	DEAD box RNA helicase [Populus alba x Populus glandulosa]	RH38	DEAD-box ATP-dependent RNA helicase 38 OS=Arabidopsis thaliana GN=RH38 PE=1 SV=2	GO:0004004(ATP-dependent RNA helicase activity);GO:0006413(translational initiation);GO:0010468(regulation of gene expression);GO:0010501(RNA secondary structure unwinding)	ENOG410XRGX(atp-dependent rna helicase)	NA	NA	NA	NA(NA)	A0A067KAE4.1 PF00270.27;DEAD;	no	no
TRINITY_DN12318_c0_g7	922	TRINITY_DN12318_c0_g7_i1	60S ribosomal protein L12-3 [Sesamum indicum]	RPL12	60S ribosomal protein L12 OS=Prunus armeniaca GN=RPL12 PE=2 SV=1	GO:0000027(ribosomal large subunit assembly);GO:0003735(structural constituent of ribosome);GO:0006412(translation);GO:0019843(rRNA binding);GO:0022625(cytosolic large ribosomal subunit)	COG0080(This protein binds directly to 23S ribosomal RNA (By similarity))	K02870	large subunit ribosomal protein L12e	-	sind03010(Ribosome)	A0A0D2QTE0.1 PF00298.17;Ribosomal_L11;	no	no
TRINITY_DN12325_c0_g1	497	TRINITY_DN12325_c0_g1_i1	ribosomal protein L14 (chloroplast) [Passiflora edulis]	rpl14	50S ribosomal protein L14, chloroplastic OS=Manihot esculenta GN=rpl14 PE=3 SV=1	GO:0003735(structural constituent of ribosome);GO:0005762(mitochondrial large ribosomal subunit);GO:0022625(cytosolic large ribosomal subunit);GO:0070180(large ribosomal subunit rRNA binding)	COG0093(Binds to 23S rRNA. Forms part of two intersubunit bridges in the 70S ribosome (By similarity))	K02874	large subunit ribosomal protein L14	-	rcu03010(Ribosome)	Q2MI64.1 PF00238.17;Ribosomal_L14;	no	no
TRINITY_DN12341_c0_g3	2440	TRINITY_DN12341_c0_g3_i1;TRINITY_DN12341_c0_g3_i2	peroxidase 12-like precursor [Nicotiana tabacum]	PER12	Peroxidase 12 OS=Arabidopsis thaliana GN=PER12 PE=1 SV=1	GO:0004601(peroxidase activity);GO:0009505(plant-type cell wall);GO:0009664(plant-type cell wall organization)	ENOG410ZMT4(peroxidase)	K00430	peroxidase	EC:1.11.1.7	nta00940(Phenylpropanoid biosynthesis)	I1LDE1.2 PF00141.21;peroxidase;	no	no
TRINITY_DN12343_c0_g2	1059	TRINITY_DN12343_c0_g2_i1	PREDICTED: endochitinase PR4-like [Populus euphratica]	EP3	Endochitinase EP3 OS=Arabidopsis thaliana GN=EP3 PE=1 SV=1	GO:0000272(polysaccharide catabolic process);GO:0004568(chitinase activity);GO:0005576(extracellular region);GO:0005618(cell wall);GO:0006032(chitin catabolic process);GO:0006952(defense response);GO:0008061(chitin binding);GO:0009611(response to wounding	COG3979(chitinase)	K01183	chitinase	EC:3.2.1.14	hbr00520(Amino sugar and nucleotide sugar metabolism)	A0A0J8BUJ6.1 PF00182.17;Glyco_hydro_19;	no	no
TRINITY_DN10469_c0_g2	3186	TRINITY_DN10469_c0_g2_i1	hypothetical protein RF2 (plastid) [Dioncophyllum thollonii]	rbcL	Ribulose bisphosphate carboxylase large chain OS=Carpinus caroliniana GN=rbcL PE=3 SV=1	GO:0016021(integral component of membrane);GO:0016339(calcium-dependent cell-cell adhesion via plasma membrane cell adhesion molecules)	COG1850(RuBisCO catalyzes two reactions the carboxylation of D- ribulose 1,5-bisphosphate, the primary event in carbon dioxide fixation, as well as the oxidative fragmentation of the pentose substrate)	K01601	ribulose-bisphosphate carboxylase large chain	EC:4.1.1.39	tcc00630(Glyoxylate and dicarboxylate metabolism);tcc00710(Carbon fixation in photosynthetic organisms)	P00877.1 PF00016.18;RuBisCO_large;	no	no
TRINITY_DN12361_c0_g3	1281	TRINITY_DN12361_c0_g3_i1;TRINITY_DN12361_c0_g3_i2;TRINITY_DN12361_c0_g3_i3;TRINITY_DN12361_c0_g3_i4;TRINITY_DN12361_c0_g3_i5	unknown [Populus trichocarpa x Populus deltoides]	-	-	GO:0005515(protein binding);GO:0008150(biological_process);GO:0009507(chloroplast);GO:0009535(chloroplast thylakoid membrane);GO:0009570(chloroplast stroma)	ENOG4111QZY(FHA domain containing protein)	-	-	-	-	W9QUM3.1 PF00498.24;FHA;	no	no
TRINITY_DN12370_c0_g1	2232	TRINITY_DN12370_c0_g1_i1;TRINITY_DN12370_c0_g1_i2	acyl-CoA-binding domain-containing protein 4 [Manihot esculenta]	ACBP4	Acyl-CoA-binding domain-containing protein 4 OS=Arabidopsis thaliana GN=ACBP4 PE=1 SV=1	GO:0005634(nucleus);GO:0005737(cytoplasm);GO:0005829(cytosol);GO:0008150(biological_process)	ENOG410Y5WM(Kelch domain containing)	NA	NA	NA	NA(NA)	A0A067LL40.1 PF13415.4;Kelch_3;	no	no
TRINITY_DN12377_c2_g5	2572	TRINITY_DN12377_c2_g5_i1	beta-xylosidase/alpha-L-arabinofuranosidase 2 [Populus trichocarpa]	Xyl1	Beta-xylosidase/alpha-L-arabinofuranosidase 1 (Fragment) OS=Medicago sativa subsp. varia GN=Xyl1 PE=1 SV=1	GO:0009044(xylan 1,4-beta-xylosidase activity);GO:0009505(plant-type cell wall);GO:0031222(arabinan catabolic process);GO:0045493(xylan catabolic process);GO:0046556(alpha-L-arabinofuranosidase activity)	COG1472(hydrolase family 3)	K15920	xylan 1,4-beta-xylosidase	EC:3.2.1.37	jcu00520(Amino sugar and nucleotide sugar metabolism)	A0A067KFX5.1 PF00933.19;Glyco_hydro_3;	no	no
TRINITY_DN12378_c0_g2	1747	TRINITY_DN12378_c0_g2_i1	PREDICTED: pyruvate dehydrogenase E1 component subunit alpha-1, mitochondrial [Populus euphratica]	E1	Pyruvate dehydrogenase E1 component subunit alpha-1, mitochondrial OS=Arabidopsis thaliana GN=E1 ALPHA PE=1 SV=2	GO:0004739(pyruvate dehydrogenase (acetyl-transferring) activity);GO:0005634(nucleus);GO:0005739(mitochondrion);GO:0005759(mitochondrial matrix);GO:0005829(cytosol);GO:0006086(acetyl-CoA biosynthetic process from pyruvate);GO:0006096(glycolytic process);G	COG1071(Dehydrogenase)	K00161	pyruvate dehydrogenase E1 component alpha subunit	EC:1.2.4.1	jcu00010(Glycolysis / Gluconeogenesis);jcu00020(Citrate cycle (TCA cycle));jcu00620(Pyruvate metabolism)	B9S2H9.1 PF00676.18;E1_dh;	no	no
TRINITY_DN12378_c0_g3	1966	TRINITY_DN12378_c0_g3_i1;TRINITY_DN12378_c0_g3_i2	pyruvate dehydrogenase E1 component subunit alpha-1, mitochondrial [Hevea brasiliensis]	E1	Pyruvate dehydrogenase E1 component subunit alpha-1, mitochondrial OS=Arabidopsis thaliana GN=E1 ALPHA PE=1 SV=2	GO:0004739(pyruvate dehydrogenase (acetyl-transferring) activity);GO:0005634(nucleus);GO:0005739(mitochondrion);GO:0005759(mitochondrial matrix);GO:0005829(cytosol);GO:0006086(acetyl-CoA biosynthetic process from pyruvate);GO:0006096(glycolytic process);G	COG1071(Dehydrogenase)	K00161	pyruvate dehydrogenase E1 component alpha subunit	EC:1.2.4.1	hbr00010(Glycolysis / Gluconeogenesis);hbr00020(Citrate cycle (TCA cycle));hbr00620(Pyruvate metabolism)	B9S2H9.1 PF00676.18;E1_dh;	no	no
TRINITY_DN12383_c0_g5	1464	TRINITY_DN12383_c0_g5_i1;TRINITY_DN12383_c0_g5_i2;TRINITY_DN12383_c0_g5_i3;TRINITY_DN12383_c0_g5_i4;TRINITY_DN12383_c0_g5_i5;TRINITY_DN12383_c0_g5_i6;TRINITY_DN12383_c0_g5_i7;TRINITY_DN12383_c0_g5_i8	PREDICTED: uncharacterized protein LOC109017055 [Juglans regia]	CPN10-1	10 kDa chaperonin 1, chloroplastic OS=Arabidopsis thaliana GN=CPN10-1 PE=2 SV=1	GO:0005759(mitochondrial matrix);GO:0006986(response to unfolded protein);GO:0009507(chloroplast);GO:0046872(metal ion binding);GO:0051082(unfolded protein binding);GO:0051085(chaperone cofactor-dependent protein refolding);GO:0051087(chaperone binding)	COG0234(Binds to cpn60 in the presence of Mg-ATP and suppresses the ATPase activity of the latter (By similarity))	NA	NA	NA	NA(NA)	B9SKH0.1 PF00166.19;Cpn10;	down	yes
TRINITY_DN12427_c1_g5	2318	TRINITY_DN12427_c1_g5_i1	pectinesterase [Populus trichocarpa]	PMEU1	Pectinesterase/pectinesterase inhibitor U1 OS=Solanum lycopersicum GN=PMEU1 PE=2 SV=1	GO:0030599(pectinesterase activity);GO:0046910(pectinesterase inhibitor activity);GO:0071944(cell periphery)	COG4677(pectinesterase)	K01051	pectinesterase	EC:3.1.1.11	jcu00040(Pentose and glucuronate interconversions)	B9T3X5.1 PF01095.17;Pectinesterase;	no	no
TRINITY_DN12438_c2_g4	2284	TRINITY_DN12438_c2_g4_i1;TRINITY_DN12438_c2_g4_i2;TRINITY_DN12438_c2_g4_i3	PREDICTED: non-specific lipid transfer protein GPI-anchored 1-like [Populus euphratica]	LTPG1	Non-specific lipid transfer protein GPI-anchored 1 OS=Arabidopsis thaliana GN=LTPG1 PE=1 SV=1	GO:0005576(extracellular region);GO:0005783(endoplasmic reticulum);GO:0005794(Golgi apparatus);GO:0005886(plasma membrane);GO:0006869(lipid transport);GO:0008289(lipid binding);GO:0009505(plant-type cell wall);GO:0031225(anchored component of membrane);GO	ENOG410YMSF(glycosylphosphatidylinositol-anchored lipid protein transfer 1)	-	-	-	-	A0A067K3I6.1 PF14368.4;LTP_2;	no	no
TRINITY_DN12456_c0_g1	1709	TRINITY_DN12456_c0_g1_i1;TRINITY_DN12456_c0_g1_i2;TRINITY_DN12456_c0_g1_i3;TRINITY_DN12456_c0_g1_i4;TRINITY_DN12456_c0_g1_i5;TRINITY_DN12456_c0_g1_i6;TRINITY_DN12456_c0_g1_i7;TRINITY_DN12456_c0_g1_i8;TRINITY_DN12456_c0_g1_i9	uncharacterized protein LOC110670799 isoform X1 [Hevea brasiliensis]	-	-	GO:0005515(protein binding);GO:0009507(chloroplast);GO:0045717(negative regulation of fatty acid biosynthetic process)	ENOG41120W7(Biotin carboxyl carrier protein of acetyl-CoA)	-	-	-	-	B9S484.1 PF00364.20;Biotin_lipoyl;	no	no
TRINITY_DN12465_c0_g3	3562	TRINITY_DN12465_c0_g3_i1;TRINITY_DN12465_c0_g3_i2;TRINITY_DN12465_c0_g3_i3;TRINITY_DN12465_c0_g3_i4;TRINITY_DN12465_c0_g3_i5;TRINITY_DN12465_c0_g3_i6;TRINITY_DN12465_c0_g3_i7;TRINITY_DN12465_c0_g3_i8	heterogeneous nuclear ribonucleoprotein R isoform X2 [Jatropha curcas]	SYNCRIP	Heterogeneous nuclear ribonucleoprotein Q OS=Homo sapiens GN=SYNCRIP PE=1 SV=2	GO:0000245(spliceosomal complex assembly);GO:0015030(Cajal body)	ENOG410XTJ5(RNA binding motif protein)	NA	NA	NA	NA(NA)	B9IIU5.2 PF00076.20;RRM_1;	no	no
TRINITY_DN12482_c0_g4	1237	TRINITY_DN12482_c0_g4_i1;TRINITY_DN12482_c0_g4_i2;TRINITY_DN12482_c0_g4_i3	50S ribosomal protein L9, chloroplastic [Jatropha curcas]	RPL9	50S ribosomal protein L9, chloroplastic OS=Ipomoea trifida GN=RPL9 PE=3 SV=1	GO:0005739(mitochondrion);GO:0006412(translation)	ENOG4111HFB(ribosomal protein l9)	K02939	large subunit ribosomal protein L9	-	jcu03010(Ribosome)	M5W0A5.1 PF03948.12;Ribosomal_L9_C;	down	yes
TRINITY_DN12482_c0_g5	2568	TRINITY_DN12482_c0_g5_i1;TRINITY_DN12482_c0_g5_i2	hypothetical protein POPTR_002G183000 [Populus trichocarpa]	PAP29	Probable inactive purple acid phosphatase 29 OS=Arabidopsis thaliana GN=PAP29 PE=2 SV=1	GO:0003993(acid phosphatase activity);GO:0004722(protein serine/threonine phosphatase activity);GO:0005576(extracellular region);GO:0005737(cytoplasm);GO:0016311(dephosphorylation);GO:0046872(metal ion binding)	COG1409(Hydrolyzes cAMP to 5'-AMP. Plays an important regulatory role in modulating the intracellular concentration of cAMP, thereby influencing cAMP-dependent processes (By similarity))	K12867	pre-mRNA-splicing factor SYF1	-	cvr03040(Spliceosome)	B9GRT8.2 PF00149.26;Metallophos;	no	no
TRINITY_DN12494_c0_g1	602	TRINITY_DN12494_c0_g1_i1;TRINITY_DN12494_c0_g1_i2;TRINITY_DN12494_c0_g1_i3	hypothetical protein DCAR_013374 [Daucus carota subsp. sativus]	-	60S acidic ribosomal protein P2 OS=Parthenium argentatum PE=3 SV=1	GO:0002181(cytoplasmic translation);GO:0003735(structural constituent of ribosome);GO:0022625(cytosolic large ribosomal subunit);GO:0030687(preribosome, large subunit precursor);GO:0070180(large ribosomal subunit rRNA binding)	COG2058(Ribosomal protein)	K02943	large subunit ribosomal protein LP2	-	nta03010(Ribosome)	D7TJ45.1 PF00428.17;Ribosomal_60s;	no	no
TRINITY_DN12494_c0_g5	592	TRINITY_DN12494_c0_g5_i1;TRINITY_DN12494_c0_g5_i2	PREDICTED: 60S acidic ribosomal protein P2-like [Gossypium hirsutum]	RPP2A	60S acidic ribosomal protein P2-1 OS=Arabidopsis thaliana GN=RPP2A PE=2 SV=2	GO:0002181(cytoplasmic translation);GO:0003735(structural constituent of ribosome);GO:0022625(cytosolic large ribosomal subunit);GO:0030687(preribosome, large subunit precursor);GO:0070180(large ribosomal subunit rRNA binding)	COG2058(Ribosomal protein)	K02943	large subunit ribosomal protein LP2	-	ghi03010(Ribosome)	M5W137.1 PF00428.17;Ribosomal_60s;	no	no
TRINITY_DN12506_c0_g6	1468	TRINITY_DN12506_c0_g6_i1	plastid-lipid-associated protein, chloroplastic [Ricinus communis]	PAP	Plastid-lipid-associated protein, chloroplastic OS=Citrus unshiu GN=PAP PE=2 SV=1	GO:0003674(molecular_function);GO:0006950(response to stress);GO:0009535(chloroplast thylakoid membrane)	ENOG4111PVP(negative regulation of photosynthesis, light reaction)	NA	NA	NA	NA(NA)	B9SEJ1.1 PF04755.10;PAP_fibrillin;	no	no
TRINITY_DN12508_c0_g3	1284	TRINITY_DN12508_c0_g3_i1	grpE protein homolog 2, mitochondrial isoform X2 [Populus trichocarpa]	grpE	Protein GrpE OS=Bradyrhizobium sp. (strain ORS 278) GN=grpE PE=3 SV=1	GO:0000774(adenyl-nucleotide exchange factor activity);GO:0001405(presequence translocase-associated import motor);GO:0005507(copper ion binding);GO:0005524(ATP binding);GO:0005739(mitochondrion);GO:0005759(mitochondrial matrix);GO:0006457(protein folding	COG0576(Participates actively in the response to hyperosmotic and heat shock by preventing the aggregation of stress-denatured proteins, in association with DnaK and GrpE. It is the nucleotide exchange factor for DnaK and may function as a thermosensor. U	NA	NA	NA	NA(NA)	B9SYX8.1 PF01025.17;GrpE;	no	no
TRINITY_DN12524_c0_g3	1742	TRINITY_DN12524_c0_g3_i1;TRINITY_DN12524_c0_g3_i2;TRINITY_DN12524_c0_g3_i3;TRINITY_DN12524_c0_g3_i4;TRINITY_DN12524_c0_g3_i5	hypothetical protein CICLE_v10018414mg [Citrus clementina]	RNP1	Heterogeneous nuclear ribonucleoprotein 1 OS=Arabidopsis thaliana GN=RNP1 PE=1 SV=1	GO:0003723(RNA binding);GO:0003729(mRNA binding);GO:0003730(mRNA 3'-UTR binding);GO:0005829(cytosol);GO:0006378(mRNA polyadenylation);GO:0019013(viral nucleocapsid);GO:0048576(positive regulation of short-day photoperiodism, flowering);GO:0048578(positive	COG0724(Rna-binding protein)	K12741	heterogeneous nuclear ribonucleoprotein A1/A3	-	jcu03040(Spliceosome)	B9GI65.2 PF00076.20;RRM_1;	no	no
TRINITY_DN12525_c0_g1	2893	TRINITY_DN12525_c0_g1_i1;TRINITY_DN12525_c0_g1_i2;TRINITY_DN12525_c0_g1_i3;TRINITY_DN12525_c0_g1_i4	PREDICTED: uncharacterized protein LOC105120651 isoform X3 [Populus euphratica]	dpf-6	Dipeptidyl peptidase family member 6 OS=Caenorhabditis elegans GN=dpf-6 PE=3 SV=2	GO:0005576(extracellular region);GO:0005829(cytosol);GO:0009507(chloroplast)	COG1506(peptidase s9 prolyl oligopeptidase active site domain protein)	NA	NA	NA	NA(NA)	B8B3Z2.1 PF00326.19;Peptidase_S9;	no	no
TRINITY_DN12531_c0_g3	958	TRINITY_DN12531_c0_g3_i1;TRINITY_DN12531_c0_g3_i2	uncharacterized protein LOC105644264 [Jatropha curcas]	-	Thioredoxin M-type, chloroplastic OS=Spinacia oleracea PE=1 SV=2	GO:0000103(sulfate assimilation);GO:0006457(protein folding);GO:0009507(chloroplast);GO:0015035(protein disulfide oxidoreductase activity);GO:0016671(oxidoreductase activity, acting on a sulfur group of donors, disulfide as acceptor);GO:0034599(cellular r	COG0526(Thioredoxin)	NA	NA	NA	NA(NA)	B9S2L1.1 PF00085.18;Thioredoxin;	no	no
TRINITY_DN12533_c1_g1	896	TRINITY_DN12533_c1_g1_i1	glycine-rich RNA-binding protein 2, mitochondrial-like [Manihot esculenta]	RBG2	Glycine-rich RNA-binding protein 2, mitochondrial OS=Arabidopsis thaliana GN=RBG2 PE=1 SV=1	GO:0003690(double-stranded DNA binding);GO:0003697(single-stranded DNA binding);GO:0003723(RNA binding);GO:0005507(copper ion binding);GO:0005524(ATP binding);GO:0005739(mitochondrion);GO:0005794(Golgi apparatus);GO:0006970(response to osmotic stress);GO:	COG0724(Rna-binding protein)	K12741	heterogeneous nuclear ribonucleoprotein A1/A3	-	mus03040(Spliceosome)	A5C101.1 PF00076.20;RRM_1;	no	no
TRINITY_DN12549_c0_g2	2070	TRINITY_DN12549_c0_g2_i1;TRINITY_DN12549_c0_g2_i2;TRINITY_DN12549_c0_g2_i3;TRINITY_DN12549_c0_g2_i4	protein plastid transcriptionally active 16, chloroplastic-like [Hevea brasiliensis]	PTAC16	Protein plastid transcriptionally active 16, chloroplastic OS=Arabidopsis thaliana GN=PTAC16 PE=1 SV=1	GO:0005515(protein binding);GO:0007623(circadian rhythm);GO:0009295(nucleoid);GO:0009507(chloroplast);GO:0009508(plastid chromosome);GO:0009534(chloroplast thylakoid);GO:0009535(chloroplast thylakoid membrane);GO:0009941(chloroplast envelope);GO:0016020(m	COG0702(epimerase dehydratase)	-	-	-	-	A9PH50.1 PF13460.4;NAD_binding_10;	no	no
TRINITY_DN12550_c0_g1	1202	TRINITY_DN12550_c0_g1_i1	PREDICTED: probable ATP synthase 24 kDa subunit, mitochondrial [Vitis vinifera]	At2g21870	Probable ATP synthase 24 kDa subunit, mitochondrial OS=Arabidopsis thaliana GN=At2g21870 PE=1 SV=1	GO:0005507(copper ion binding);GO:0005730(nucleolus);GO:0005739(mitochondrion);GO:0005753(mitochondrial proton-transporting ATP synthase complex);GO:0008270(zinc ion binding);GO:0009507(chloroplast);GO:0009555(pollen development);GO:0016020(membrane);GO:0	ENOG410Y0FV(ATP synthase 24 kDa subunit)	-	-	-	-	A0A059B853.1 PF15704.3;Mt_ATP_synt;	no	no
TRINITY_DN12560_c0_g3	2228	TRINITY_DN12560_c0_g3_i1;TRINITY_DN12560_c0_g3_i10;TRINITY_DN12560_c0_g3_i11;TRINITY_DN12560_c0_g3_i12;TRINITY_DN12560_c0_g3_i13;TRINITY_DN12560_c0_g3_i2;TRINITY_DN12560_c0_g3_i3;TRINITY_DN12560_c0_g3_i4;TRINITY_DN12560_c0_g3_i5;TRINITY_DN12560_c0_g3_i6;T	dihydroxy-acid dehydratase, chloroplastic [Populus trichocarpa]	DHAD	Dihydroxy-acid dehydratase, chloroplastic OS=Arabidopsis thaliana GN=DHAD PE=1 SV=1	GO:0004160(dihydroxy-acid dehydratase activity);GO:0009082(branched-chain amino acid biosynthetic process);GO:0009570(chloroplast stroma)	COG0129(Dihydroxy-acid dehydratase)	K01687	dihydroxy-acid dehydratase	EC:4.2.1.9	jcu00290(Valine, leucine and isoleucine biosynthesis);jcu00770(Pantothenate and CoA biosynthesis)	B9RWL5.1 PF00920.19;ILVD_EDD;	no	no
TRINITY_DN12563_c0_g2	1654	TRINITY_DN12563_c0_g2_i1;TRINITY_DN12563_c0_g2_i2;TRINITY_DN12563_c0_g2_i3;TRINITY_DN12563_c0_g2_i4	PREDICTED: carboxyl-terminal-processing peptidase 2, chloroplastic-like isoform X1 [Juglans regia]	CTPA2	Carboxyl-terminal-processing peptidase 2, chloroplastic OS=Arabidopsis thaliana GN=CTPA2 PE=1 SV=1	GO:0005576(extracellular region);GO:0005739(mitochondrion);GO:0006508(proteolysis);GO:0008236(serine-type peptidase activity);GO:0009543(chloroplast thylakoid lumen);GO:0009579(thylakoid);GO:0031977(thylakoid lumen);GO:0035556(intracellular signal transdu	COG0793(protease)	NA	NA	NA	NA(NA)	A0A067EL19.1 PF03572.16;Peptidase_S41;	no	no
TRINITY_DN12567_c1_g1	2019	TRINITY_DN12567_c1_g1_i1;TRINITY_DN12567_c1_g1_i2;TRINITY_DN12567_c1_g1_i3;TRINITY_DN12567_c1_g1_i4;TRINITY_DN12567_c1_g1_i5	phosphoribulokinase, chloroplastic [Jatropha curcas]	-	Phosphoribulokinase, chloroplastic OS=Mesembryanthemum crystallinum PE=2 SV=1	GO:0004849(uridine kinase activity);GO:0005829(cytosol);GO:0006206(pyrimidine nucleobase metabolic process);GO:0009507(chloroplast);GO:0043097(pyrimidine nucleoside salvage)	COG0572(uridine kinase)	K00855	phosphoribulokinase	EC:2.7.1.19	jcu00710(Carbon fixation in photosynthetic organisms)	K7UIA4.1 PF00485.16;PRK;	no	no
TRINITY_DN12579_c1_g3	753	TRINITY_DN12579_c1_g3_i1;TRINITY_DN12579_c1_g3_i2;TRINITY_DN12579_c1_g3_i3	peptidyl-prolyl cis-trans isomerase FKBP15-1 [Jatropha curcas]	FKBP15-1	Peptidyl-prolyl cis-trans isomerase FKBP15-1 OS=Arabidopsis thaliana GN=FKBP15-1 PE=2 SV=2	GO:0003755(peptidyl-prolyl cis-trans isomerase activity);GO:0005528(FK506 binding);GO:0005789(endoplasmic reticulum membrane);GO:0061077(chaperone-mediated protein folding)	COG0545(Peptidyl-prolyl cis-trans isomerase)	NA	NA	NA	NA(NA)	I1JM67.1 PF00254.26;FKBP_C;	no	no
TRINITY_DN12606_c0_g4	1897	TRINITY_DN12606_c0_g4_i1;TRINITY_DN12606_c0_g4_i2	14-3-3 protein 7 [Jatropha curcas]	TFT7	14-3-3 protein 7 OS=Solanum lycopersicum GN=TFT7 PE=2 SV=2	GO:0005515(protein binding);GO:0005524(ATP binding);GO:0005634(nucleus);GO:0005737(cytoplasm);GO:0005739(mitochondrion);GO:0005829(cytosol);GO:0005886(plasma membrane);GO:0009506(plasmodesma);GO:0009570(chloroplast stroma);GO:0009737(response to abscisic	COG5040(Tyrosine 3-monooxygenase tryptophan 5-monooxygenase activation protein)	NA	NA	NA	NA(NA)	U5GGA6.1 PF00244.18;14-3-3;	up	yes
TRINITY_DN12607_c0_g1	3122	TRINITY_DN12607_c0_g1_i1;TRINITY_DN12607_c0_g1_i2;TRINITY_DN12607_c0_g1_i3;TRINITY_DN12607_c0_g1_i4;TRINITY_DN12607_c0_g1_i5	apoptotic chromatin condensation inducer in the nucleus [Jatropha curcas]	ACIN1	Apoptotic chromatin condensation inducer in the nucleus OS=Homo sapiens GN=ACIN1 PE=1 SV=2	GO:0003676(nucleic acid binding);GO:0003677(DNA binding);GO:0005634(nucleus);GO:0005737(cytoplasm);GO:0005829(cytosol);GO:0009507(chloroplast)	ENOG4111HR1(Apoptotic chromatin condensation inducer 1)	K12875	apoptotic chromatin condensation inducer in the nucleus	-	jcu03040(Spliceosome);jcu03013(RNA transport);jcu03015(mRNA surveillance pathway)	A0A067LQN5.1 PF16294.3;RSB_motif;	no	no
TRINITY_DN12612_c0_g4	762	TRINITY_DN12612_c0_g4_i1	PREDICTED: MLP-like protein 43 [Populus euphratica]	MLP28	MLP-like protein 28 OS=Arabidopsis thaliana GN=MLP28 PE=1 SV=1	GO:0003674(molecular_function);GO:0005634(nucleus);GO:0005737(cytoplasm);GO:0006952(defense response);GO:0009507(chloroplast);GO:0009607(response to biotic stimulus)	ENOG4111C37(response to biotic stimulus)	-	-	-	-	B9HW52.1 PF00407.17;Bet_v_1;	no	no
TRINITY_DN12617_c0_g1	752	TRINITY_DN12617_c0_g1_i1;TRINITY_DN12617_c0_g1_i2;TRINITY_DN12617_c0_g1_i3;TRINITY_DN12617_c0_g1_i4	nascent polypeptide-associated complex subunit beta-like [Manihot esculenta]	BTF3	Basic transcription factor 3 OS=Arabidopsis thaliana GN=BTF3 PE=1 SV=1	GO:0003700(DNA binding transcription factor activity);GO:0005515(protein binding);GO:0005634(nucleus);GO:0006351(transcription, DNA-templated);GO:0006355(regulation of transcription, DNA-templated);GO:0009651(response to salt stress)	ENOG4111JBG(Component of the nascent polypeptide-associated complex (NAC), a dynamic component of the ribosomal exit tunnel, protecting the emerging polypeptides from interaction with other cytoplasmic proteins to ensure appropriate nascent protein target	-	-	-	-	C5WSV6.1 PF01849.16;NAC;	no	no
TRINITY_DN10505_c0_g8	916	TRINITY_DN10505_c0_g8_i1;TRINITY_DN10505_c0_g8_i2	60S ribosomal protein L23 [Sorghum bicolor]	RPL23A	60S ribosomal protein L23 OS=Arabidopsis thaliana GN=RPL23A PE=2 SV=3	GO:0003735(structural constituent of ribosome);GO:0022625(cytosolic large ribosomal subunit);GO:0070180(large ribosomal subunit rRNA binding)	COG0093(Binds to 23S rRNA. Forms part of two intersubunit bridges in the 70S ribosome (By similarity))	K02894	large subunit ribosomal protein L23e	-	sind03010(Ribosome)	M0WUX6.1 PF00238.17;Ribosomal_L14;	no	no
TRINITY_DN12626_c0_g17	972	TRINITY_DN12626_c0_g17_i1	tubulin beta chain-like [Phoenix dactylifera]	TUBB3	Tubulin beta-3 chain OS=Oryza sativa subsp. japonica GN=TUBB3 PE=2 SV=2	GO:0005198(structural molecule activity);GO:0005618(cell wall);GO:0005730(nucleolus);GO:0005737(cytoplasm);GO:0005794(Golgi apparatus);GO:0005886(plasma membrane);GO:0007017(microtubule-based process);GO:0009506(plasmodesma);GO:0009651(response to salt st	COG5023(protein polymerization)	K07375	tubulin beta	-	pda04145(Phagosome)	A0A0B0P2Z7.1 PF00091.23;Tubulin;	no	no
TRINITY_DN12626_c0_g8	617	TRINITY_DN12626_c0_g8_i1	beta-tubulin 4a [Linum usitatissimum]	TUBB	Tubulin beta chain (Fragment) OS=Glycine max GN=TUBB PE=2 SV=2	GO:0003924(GTPase activity);GO:0005200(structural constituent of cytoskeleton);GO:0005515(protein binding);GO:0005525(GTP binding);GO:0005618(cell wall);GO:0005737(cytoplasm);GO:0005774(vacuolar membrane);GO:0005874(microtubule);GO:0005886(plasma membrane	COG5023(protein polymerization)	K07375	tubulin beta	-	gmx04145(Phagosome)	A0A0B0P2Z7.1 PF00091.23;Tubulin;	no	no
TRINITY_DN10506_c0_g5	1293	TRINITY_DN10506_c0_g5_i1;TRINITY_DN10506_c0_g5_i2	RNA-binding protein 2 [Jatropha curcas]	RBP1	RNA-binding protein 1 OS=Medicago truncatula GN=RBP1 PE=2 SV=1	GO:0000398(mRNA splicing, via spliceosome);GO:0035614(snRNA stem-loop binding)	ENOG41127HC(RNA recognition motif containing protein)	-	-	-	-	B9GTK9.1 PF00076.20;RRM_1;	no	no
TRINITY_DN12651_c0_g1	1747	TRINITY_DN12651_c0_g1_i1;TRINITY_DN12651_c0_g1_i2;TRINITY_DN12651_c0_g1_i3;TRINITY_DN12651_c0_g1_i4;TRINITY_DN12651_c0_g1_i5;TRINITY_DN12651_c0_g1_i6;TRINITY_DN12651_c0_g1_i7	peroxisomal 3-keto-acyl-CoA thiolase [Hevea brasiliensis]	PED1	3-ketoacyl-CoA thiolase 2, peroxisomal OS=Arabidopsis thaliana GN=PED1 PE=1 SV=2	GO:0003988(acetyl-CoA C-acyltransferase activity);GO:0005730(nucleolus);GO:0005739(mitochondrion);GO:0005774(vacuolar membrane);GO:0005777(peroxisome);GO:0005829(cytosol);GO:0006635(fatty acid beta-oxidation);GO:0009507(chloroplast);GO:0009514(glyoxysome)	COG0183(acetyl-coa acetyltransferase)	K07513	acetyl-CoA acyltransferase 1	EC:2.3.1.16	cit00071(Fatty acid degradation);cit00592(alpha-Linolenic acid metabolism);cit01040(Biosynthesis of unsaturated fatty acids);cit00280(Valine, leucine and isoleucine degradation);cit04146(Peroxisome)	A0A061EK03.1 PF00108.21;Thiolase_N;	no	no
TRINITY_DN12655_c0_g1	1990	TRINITY_DN12655_c0_g1_i1;TRINITY_DN12655_c0_g1_i10;TRINITY_DN12655_c0_g1_i2;TRINITY_DN12655_c0_g1_i3;TRINITY_DN12655_c0_g1_i4;TRINITY_DN12655_c0_g1_i5;TRINITY_DN12655_c0_g1_i6;TRINITY_DN12655_c0_g1_i7;TRINITY_DN12655_c0_g1_i8;TRINITY_DN12655_c0_g1_i9	PREDICTED: protein-L-isoaspartate O-methyltransferase 1-like [Populus euphratica]	PIMT1	Protein-L-isoaspartate O-methyltransferase 1 OS=Arabidopsis thaliana GN=PIMT1 PE=1 SV=3	GO:0004719(protein-L-isoaspartate (D-aspartate) O-methyltransferase activity);GO:0005737(cytoplasm);GO:0005829(cytosol);GO:0006464(cellular protein modification process);GO:0007568(aging);GO:0009651(response to salt stress);GO:0009737(response to abscisic	COG2518(Catalyzes the methyl esterification of L-isoaspartyl residues in peptides and proteins that result from spontaneous decomposition of normal L-aspartyl and L-asparaginyl residues. It plays a role in the repair and or degradation of damaged proteins	NA	NA	NA	NA(NA)	B9I3I9.2 PF01135.17;PCMT;	up	yes
TRINITY_DN12656_c0_g1	875	TRINITY_DN12656_c0_g1_i1;TRINITY_DN12656_c0_g1_i2;TRINITY_DN12656_c0_g1_i3;TRINITY_DN12656_c0_g1_i4;TRINITY_DN12656_c0_g1_i5;TRINITY_DN12656_c0_g1_i6;TRINITY_DN12656_c0_g1_i7;TRINITY_DN12656_c0_g1_i8;TRINITY_DN12656_c0_g1_i9	pro-hevein-like [Hevea brasiliensis]	HEV1	Pro-hevein OS=Hevea brasiliensis GN=HEV1 PE=1 SV=2	GO:0000325(plant-type vacuole);GO:0004540(ribonuclease activity);GO:0004568(chitinase activity);GO:0005576(extracellular region);GO:0008061(chitin binding);GO:0009615(response to virus);GO:0009627(systemic acquired resistance);GO:0009651(response to salt	COG3979(chitinase)	K20547	basic endochitinase B	EC:3.2.1.14	adu00520(Amino sugar and nucleotide sugar metabolism);adu04016(MAPK signaling pathway - plant)	B9I5G0.1 PF00967.15;Barwin;	no	no
TRINITY_DN12668_c0_g7	2318	TRINITY_DN12668_c0_g7_i1	importin subunit alpha-2-like [Manihot esculenta]	IMPA1	Importin subunit alpha-1 OS=Arabidopsis thaliana GN=IMPA1 PE=1 SV=2	GO:0005643(nuclear pore);GO:0005654(nucleoplasm);GO:0005829(cytosol);GO:0006607(NLS-bearing protein import into nucleus);GO:0008139(nuclear localization sequence binding)	COG5064(importin subunit alpha)	-	-	-	-	B9I717.1 PF01749.18;IBB;	no	no
TRINITY_DN12681_c1_g3	3055	TRINITY_DN12681_c1_g3_i1	1,4-alpha-glucan-branching enzyme 2-2, chloroplastic/amyloplastic-like [Hevea brasiliensis]	SBEI	1,4-alpha-glucan-branching enzyme 1, chloroplastic/amyloplastic OS=Pisum sativum GN=SBEI PE=1 SV=1	GO:0003844(1,4-alpha-glucan branching enzyme activity);GO:0009790(embryo development)	COG0296(Catalyzes the formation of the alpha-1,6-glucosidic linkages in glycogen by scission of a 1,4-alpha-linked oligosaccharide from growing alpha-1,4-glucan chains and the subsequent attachment of the oligosaccharide to the alpha-1,6 position (By simi	K00700	1,4-alpha-glucan branching enzyme	EC:2.4.1.18	hbr00500(Starch and sucrose metabolism)	A0A0J8BXQ1.1 PF00128.22;Alpha-amylase;	no	no
TRINITY_DN12682_c0_g1	1447	TRINITY_DN12682_c0_g1_i1;TRINITY_DN12682_c0_g1_i10;TRINITY_DN12682_c0_g1_i11;TRINITY_DN12682_c0_g1_i12;TRINITY_DN12682_c0_g1_i13;TRINITY_DN12682_c0_g1_i14;TRINITY_DN12682_c0_g1_i15;TRINITY_DN12682_c0_g1_i16;TRINITY_DN12682_c0_g1_i17;TRINITY_DN12682_c0_g1_	serine/arginine-rich splicing factor RS41 isoform X1 [Populus trichocarpa]	RS41	Serine/arginine-rich splicing factor RS41 OS=Arabidopsis thaliana GN=RS41 PE=1 SV=2	GO:0000179(rRNA (adenine-N6,N6-)-dimethyltransferase activity);GO:0005737(cytoplasm)	COG0724(Rna-binding protein)	K12893	splicing factor, arginine/serine-rich 4/5/6	-	nta03040(Spliceosome)	B9GPU9.1 PF00076.20;RRM_1;	no	no
TRINITY_DN12689_c0_g1	2821	TRINITY_DN12689_c0_g1_i1;TRINITY_DN12689_c0_g1_i2	protein TOC75-3, chloroplastic isoform X1 [Populus trichocarpa]	TOC75-3	Protein TOC75-3, chloroplastic OS=Arabidopsis thaliana GN=TOC75-3 PE=1 SV=1	GO:0005515(protein binding);GO:0005774(vacuolar membrane);GO:0009507(chloroplast);GO:0009536(plastid);GO:0009658(chloroplast organization);GO:0009735(response to cytokinin);GO:0009941(chloroplast envelope);GO:0010006(Toc complex);GO:0015450(P-P-bond-hydro	COG4775(Gram-negative-bacterium-type cell outer membrane assembly)	NA	NA	NA	NA(NA)	A0A067LDU8.1 PF01103.21;Bac_surface_Ag;	no	no
TRINITY_DN12707_c2_g5	751	TRINITY_DN12707_c2_g5_i1;TRINITY_DN12707_c2_g5_i2	PREDICTED: NADH dehydrogenase [ubiquinone] 1 beta subcomplex subunit 9-like [Juglans regia]	CIB22	NADH dehydrogenase [ubiquinone] 1 beta subcomplex subunit 9 OS=Arabidopsis thaliana GN=CIB22 PE=1 SV=1	GO:0005747(mitochondrial respiratory chain complex I);GO:0006120(mitochondrial electron transport, NADH to ubiquinone);GO:0008137(NADH dehydrogenase (ubiquinone) activity)	ENOG4111PES(NADH dehydrogenase (ubiquinone) 1 beta subcomplex)	K03965	NADH dehydrogenase (ubiquinone) 1 beta subcomplex subunit 9	-	mcha00190(Oxidative phosphorylation)	A0A0J8BH62.1 PF05347.13;Complex1_LYR;	up	yes
TRINITY_DN12711_c0_g4	1100	TRINITY_DN12711_c0_g4_i1	pyrroline-5-carboxylate reductase [Jatropha curcas]	-	Pyrroline-5-carboxylate reductase OS=Glycine max PE=2 SV=1	GO:0004735(pyrroline-5-carboxylate reductase activity);GO:0005618(cell wall);GO:0005737(cytoplasm);GO:0006561(proline biosynthetic process);GO:0009408(response to heat);GO:0009651(response to salt stress);GO:0055114(oxidation-reduction process);GO:0055129	COG0345(pyrroline-5-carboxylate reductase activity)	K00286	pyrroline-5-carboxylate reductase	EC:1.5.1.2	jcu00330(Arginine and proline metabolism)	P17817.1 PF14748.4;P5CR_dimer;	no	no
TRINITY_DN12734_c0_g3	894	TRINITY_DN12734_c0_g3_i1	huntingtin-interacting protein K-like [Hevea brasiliensis]	-	-	GO:0003677(DNA binding);GO:0005634(nucleus);GO:0005829(cytosol);GO:0008150(biological_process)	ENOG4111M4G(huntingtin interacting protein K)	-	-	-	-	-	no	no
TRINITY_DN12742_c0_g4	2928	TRINITY_DN12742_c0_g4_i1;TRINITY_DN12742_c0_g4_i2;TRINITY_DN12742_c0_g4_i3;TRINITY_DN12742_c0_g4_i4	succinate dehydrogenase [ubiquinone] flavoprotein subunit 1, mitochondrial [Manihot esculenta]	SDH1-1	Succinate dehydrogenase [ubiquinone] flavoprotein subunit 1, mitochondrial OS=Arabidopsis thaliana GN=SDH1-1 PE=1 SV=1	GO:0000104(succinate dehydrogenase activity);GO:0005524(ATP binding);GO:0005618(cell wall);GO:0005739(mitochondrion);GO:0005749(mitochondrial respiratory chain complex II, succinate dehydrogenase complex (ubiquinone));GO:0005794(Golgi apparatus);GO:000609	COG1053(Succinate DeHydrogenase)	K00234	succinate dehydrogenase (ubiquinone) flavoprotein subunit	EC:1.3.5.1	hbr00020(Citrate cycle (TCA cycle));hbr00190(Oxidative phosphorylation)	D8TTD9.1 PF00890.22;FAD_binding_2;	down	yes
TRINITY_DN12756_c0_g8	911	TRINITY_DN12756_c0_g8_i1	PREDICTED: thaumatin-like protein [Pyrus x bretschneideri]	tlp	Thaumatin-like protein OS=Actinidia deliciosa GN=tlp PE=1 SV=2	GO:0005515(protein binding)	ENOG410YD4X(thaumatin-like protein)	NA	NA	NA	NA(NA)	A0A067LH15.1 PF00314.15;Thaumatin;	no	no
TRINITY_DN12762_c0_g2	1564	TRINITY_DN12762_c0_g2_i1;TRINITY_DN12762_c0_g2_i2;TRINITY_DN12762_c0_g2_i3;TRINITY_DN12762_c0_g2_i4;TRINITY_DN12762_c0_g2_i5;TRINITY_DN12762_c0_g2_i6	PREDICTED: mitochondrial outer membrane protein porin 4-like [Populus euphratica]	VDAC4	Mitochondrial outer membrane protein porin 4 OS=Arabidopsis thaliana GN=VDAC4 PE=1 SV=1	GO:0005739(mitochondrion);GO:0005741(mitochondrial outer membrane);GO:0005886(plasma membrane);GO:0006820(anion transport);GO:0008308(voltage-gated anion channel activity);GO:0009617(response to bacterium);GO:0015288(porin activity);GO:0016020(membrane);G	ENOG410ZBK1(voltage-dependent anion channel)	NA	NA	NA	NA(NA)	B9N2Z1.1 PF01459.20;Porin_3;	up	yes
TRINITY_DN12763_c0_g2	1644	TRINITY_DN12763_c0_g2_i1;TRINITY_DN12763_c0_g2_i10;TRINITY_DN12763_c0_g2_i2;TRINITY_DN12763_c0_g2_i3;TRINITY_DN12763_c0_g2_i4;TRINITY_DN12763_c0_g2_i5;TRINITY_DN12763_c0_g2_i6;TRINITY_DN12763_c0_g2_i7;TRINITY_DN12763_c0_g2_i8;TRINITY_DN12763_c0_g2_i9	eukaryotic translation initiation factor 3 subunit J-like [Quercus suber]	-	-	GO:0002181(cytoplasmic translation);GO:0003743(translation initiation factor activity);GO:0005852(eukaryotic translation initiation factor 3 complex)	ENOG4111U5G(Component of the eukaryotic translation initiation factor 3 (eIF-3) complex, which is involved in protein synthesis and, together with other initiation factors, stimulates binding of mRNA and methionyl-tRNAi to the 40S ribosome (By similarity)	K03245	translation initiation factor 3 subunit J	-	nnu03013(RNA transport)	A9P9B6.1 PF08597.8;eIF3_subunit;	no	no
TRINITY_DN12769_c0_g11	629	TRINITY_DN12769_c0_g11_i1	cysteine proteinase inhibitor 6 [Populus trichocarpa]	Os01g0270100	Cysteine proteinase inhibitor 12 OS=Oryza sativa subsp. japonica GN=Os01g0270100 PE=2 SV=1	GO:0002020(protease binding);GO:0004869(cysteine-type endopeptidase inhibitor activity);GO:0005515(protein binding);GO:0005576(extracellular region);GO:0005783(endoplasmic reticulum);GO:0005829(cytosol);GO:0006952(defense response);GO:0006972(hyperosmotic	ENOG410YC0U(Cysteine proteinase inhibitor)	NA	NA	NA	NA(NA)	F6HV98.1 PF16845.3;SQAPI;	up	yes
TRINITY_DN12770_c0_g2	2361	TRINITY_DN12770_c0_g2_i1;TRINITY_DN12770_c0_g2_i2;TRINITY_DN12770_c0_g2_i3;TRINITY_DN12770_c0_g2_i4	chaperonin 60 subunit beta 2, chloroplastic [Jatropha curcas]	CPN60B2	Chaperonin 60 subunit beta 2, chloroplastic OS=Arabidopsis thaliana GN=CPN60B2 PE=1 SV=1	GO:0005524(ATP binding);GO:0005634(nucleus);GO:0005730(nucleolus);GO:0005739(mitochondrion);GO:0005794(Golgi apparatus);GO:0005829(cytosol);GO:0006458('de novo' protein folding);GO:0007005(mitochondrion organization);GO:0009507(chloroplast);GO:0009570(chl	COG0459(Prevents misfolding and promotes the refolding and proper assembly of unfolded polypeptides generated under stress conditions (By similarity))	K04077	chaperonin GroEL	-	jcu03018(RNA degradation)	A0A022QVT7.1 PF00118.22;Cpn60_TCP1;	no	no
TRINITY_DN10531_c0_g5	956	TRINITY_DN10531_c0_g5_i1;TRINITY_DN10531_c0_g5_i2;TRINITY_DN10531_c0_g5_i3	hypothetical protein CDL15_Pgr012730 [Punica granatum]	RPL8A	60S ribosomal protein L8-1 OS=Arabidopsis thaliana GN=RPL8A PE=1 SV=2	GO:0002181(cytoplasmic translation);GO:0003735(structural constituent of ribosome);GO:0022625(cytosolic large ribosomal subunit)	COG0090(One of the primary rRNA binding proteins. Required for association of the 30S and 50S subunits to form the 70S ribosome, for tRNA binding and peptide bond formation. It has been suggested to have peptidyltransferase activity)	K02938	large subunit ribosomal protein L8e	-	cpap03010(Ribosome)	M4DML4.1 PF03947.16;Ribosomal_L2_C;	no	no
TRINITY_DN12797_c0_g2	2690	TRINITY_DN12797_c0_g2_i1;TRINITY_DN12797_c0_g2_i2;TRINITY_DN12797_c0_g2_i3;TRINITY_DN12797_c0_g2_i4;TRINITY_DN12797_c0_g2_i5;TRINITY_DN12797_c0_g2_i6	aldose 1-epimerase-like [Hevea brasiliensis]	GALM	Aldose 1-epimerase OS=Bos taurus GN=GALM PE=2 SV=1	GO:0004034(aldose 1-epimerase activity);GO:0005737(cytoplasm);GO:0006006(glucose metabolic process);GO:0006012(galactose metabolic process);GO:0030246(carbohydrate binding)	COG2017(converts alpha-aldose to the beta-anomer. It is active on D-glucose, L-arabinose, D-xylose, D-galactose, maltose and lactose (By similarity))	K01785	aldose 1-epimerase	EC:5.1.3.3	hbr00010(Glycolysis / Gluconeogenesis);hbr00052(Galactose metabolism)	B9H3Y1.1 PF01263.18;Aldose_epim;	up	yes
TRINITY_DN12803_c1_g3	2250	TRINITY_DN12803_c1_g3_i1;TRINITY_DN12803_c1_g3_i2	MICOS complex subunit mic60 [Hevea brasiliensis]	MIC60	MICOS complex subunit MIC60 OS=Ajellomyces capsulatus (strain NAm1 / WU24) GN=MIC60 PE=3 SV=1	GO:0005515(protein binding);GO:0005739(mitochondrion);GO:0005743(mitochondrial inner membrane);GO:0008150(biological_process);GO:0016021(integral component of membrane);GO:0097035(regulation of membrane lipid distribution);GO:0098800(inner mitochondrial m	ENOG4111IIC(Mitochondrial inner membrane protein)	NA	NA	NA	NA(NA)	B9SSL9.1 PF09731.7;Mitofilin;	no	no
TRINITY_DN10534_c0_g3	1616	TRINITY_DN10534_c0_g3_i1	DNA damage-repair/toleration protein DRT100 [Jatropha curcas]	PGIP1	Polygalacturonase inhibitor 1 OS=Arabidopsis thaliana GN=PGIP1 PE=1 SV=1	GO:0005618(cell wall);GO:0005829(cytosol);GO:0005886(plasma membrane);GO:0006952(defense response);GO:0007165(signal transduction);GO:0009505(plant-type cell wall);GO:0009507(chloroplast);GO:0080167(response to karrikin)	COG4886(leucine Rich Repeat)	-	-	-	-	A0A067LMF7.1 PF08263.10;LRRNT_2;	no	no
TRINITY_DN12817_c0_g4	1294	TRINITY_DN12817_c0_g4_i1;TRINITY_DN12817_c0_g4_i2	PREDICTED: peptidyl-prolyl cis-trans isomerase CYP26-2, chloroplastic [Populus euphratica]	CYP26-2	Peptidyl-prolyl cis-trans isomerase CYP26-2, chloroplastic OS=Arabidopsis thaliana GN=CYP26-2 PE=2 SV=1	GO:0003755(peptidyl-prolyl cis-trans isomerase activity)	COG0652(peptidyl-prolyl cis-trans isomerase activity)	NA	NA	NA	NA(NA)	B9I2N9.1 PF00160.19;Pro_isomerase;	no	no
TRINITY_DN12844_c0_g1	1940	TRINITY_DN12844_c0_g1_i1;TRINITY_DN12844_c0_g1_i2;TRINITY_DN12844_c0_g1_i3;TRINITY_DN12844_c0_g1_i4;TRINITY_DN12844_c0_g1_i5;TRINITY_DN12844_c0_g1_i6;TRINITY_DN12844_c0_g1_i7;TRINITY_DN12844_c0_g1_i8;TRINITY_DN12844_c0_g1_i9	cyclase-associated protein 1 [Ricinus communis]	CAP1	Cyclase-associated protein 1 OS=Arabidopsis thaliana GN=CAP1 PE=2 SV=1	GO:0003779(actin binding);GO:0005829(cytosol);GO:0005886(plasma membrane);GO:0007010(cytoskeleton organization);GO:0007163(establishment or maintenance of cell polarity);GO:0007165(signal transduction);GO:0008154(actin polymerization or depolymerization);	ENOG410XPXJ(adenylyl cyclase-associated protein)	NA	NA	NA	NA(NA)	B9RBE7.1 PF01213.17;CAP_N;	no	no
TRINITY_DN12847_c0_g5	999	TRINITY_DN12847_c0_g5_i1	peptidyl-prolyl cis-trans isomerase CYP19-3 [Populus trichocarpa]	CYP19-3	Peptidyl-prolyl cis-trans isomerase CYP19-3 OS=Arabidopsis thaliana GN=CYP19-3 PE=2 SV=2	GO:0003755(peptidyl-prolyl cis-trans isomerase activity)	COG0652(peptidyl-prolyl cis-trans isomerase activity)	NA	NA	NA	NA(NA)	A9PA45.1 PF00160.19;Pro_isomerase;	no	no
TRINITY_DN12854_c1_g5	2078	TRINITY_DN12854_c1_g5_i1	protein MODIFIER OF SNC1 11 isoform X1 [Jatropha curcas]	-	-	-	-	NA	NA	NA	NA(NA)	-	no	no
TRINITY_DN12855_c0_g3	821	TRINITY_DN12855_c0_g3_i1;TRINITY_DN12855_c0_g3_i2	prefoldin subunit 6 [Manihot esculenta]	PFDN6	Prefoldin subunit 6 OS=Bos taurus GN=PFDN6 PE=2 SV=1	GO:0005737(cytoplasm);GO:0006457(protein folding);GO:0016272(prefoldin complex);GO:0051087(chaperone binding);GO:0051131(chaperone-mediated protein complex assembly)	ENOG4111S9Q(Prefoldin, subunit)	NA	NA	NA	NA(NA)	F6HLR2.1 PF01920.18;Prefoldin_2;	no	no
TRINITY_DN10759_c0_g5	480	TRINITY_DN10759_c0_g5_i1;TRINITY_DN10759_c0_g5_i2	histone 3 [Conocephalum conicum]	HHT2	Histone H3.2 OS=Ustilago maydis (strain 521 / FGSC 9021) GN=HHT2 PE=3 SV=3	GO:0000786(nucleosome);GO:0003677(DNA binding);GO:0005634(nucleus);GO:0005694(chromosome);GO:0006334(nucleosome assembly);GO:0031492(nucleosomal DNA binding);GO:0046982(protein heterodimerization activity)	COG2036(Core component of nucleosome. Nucleosomes wrap and compact DNA into chromatin, limiting DNA accessibility to the cellular machineries which require DNA as a template. Histones thereby play a central role in transcription regulation, DNA repair, DN	NA	NA	NA	NA(NA)	E3JT42.1 PF00125.22;Histone;	no	no
TRINITY_DN12871_c0_g4	2812	TRINITY_DN12871_c0_g4_i1;TRINITY_DN12871_c0_g4_i2	ALBINO3-like protein 1, chloroplastic isoform X1 [Manihot esculenta]	ALB3L1	ALBINO3-like protein 1, chloroplastic OS=Arabidopsis thaliana GN=ALB3L1 PE=2 SV=3	GO:0005515(protein binding);GO:0005886(plasma membrane);GO:0007165(signal transduction);GO:0009507(chloroplast);GO:0009535(chloroplast thylakoid membrane);GO:0009579(thylakoid);GO:0009658(chloroplast organization);GO:0016020(membrane);GO:0016021(integral	COG0706(Required for the insertion and or proper folding and or complex formation of integral membrane proteins into the membrane. Involved in integration of membrane proteins that insert both dependently and independently of the Sec translocase complex,	K03217	YidC/Oxa1 family membrane protein insertase	-	hbr03060(Protein export)	V7D395.1 PF02096.18;60KD_IMP;	no	no
TRINITY_DN12881_c0_g1	2199	TRINITY_DN12881_c0_g1_i1;TRINITY_DN12881_c0_g1_i2	T-complex protein 1 subunit beta [Manihot esculenta]	CCT2	T-complex protein 1 subunit beta OS=Arabidopsis thaliana GN=CCT2 PE=1 SV=1	GO:0005524(ATP binding);GO:0005618(cell wall);GO:0005737(cytoplasm);GO:0005829(cytosol);GO:0046658(anchored component of plasma membrane)	COG0459(Prevents misfolding and promotes the refolding and proper assembly of unfolded polypeptides generated under stress conditions (By similarity))	NA	NA	NA	NA(NA)	B9MTB4.1 PF00118.22;Cpn60_TCP1;	no	no
TRINITY_DN12882_c1_g1	530	TRINITY_DN12882_c1_g1_i1;TRINITY_DN12882_c1_g1_i2;TRINITY_DN12882_c1_g1_i3;TRINITY_DN12882_c1_g1_i4;TRINITY_DN12882_c1_g1_i5;TRINITY_DN12882_c1_g1_i6	PREDICTED: uncharacterized protein LOC104904967 [Beta vulgaris subsp. vulgaris]	-	-	-	-	-	-	-	-	A0A0J8EDX3.1 PF07468.9;Agglutinin;	down	yes
TRINITY_DN12898_c0_g1	1123	TRINITY_DN12898_c0_g1_i1;TRINITY_DN12898_c0_g1_i2;TRINITY_DN12898_c0_g1_i3;TRINITY_DN12898_c0_g1_i4;TRINITY_DN12898_c0_g1_i5;TRINITY_DN12898_c0_g1_i6;TRINITY_DN12898_c0_g1_i7	glycine-rich RNA-binding protein 2, mitochondrial-like [Manihot esculenta]	RBG3	Glycine-rich RNA-binding protein 3, mitochondrial OS=Arabidopsis thaliana GN=RBG3 PE=2 SV=1	GO:0003697(single-stranded DNA binding);GO:0003723(RNA binding);GO:0005507(copper ion binding);GO:0005515(protein binding);GO:0005524(ATP binding);GO:0005739(mitochondrion);GO:0006397(mRNA processing);GO:0009409(response to cold);GO:0016554(cytidine to ur	COG0724(Rna-binding protein)	K12741	heterogeneous nuclear ribonucleoprotein A1/A3	-	jcu03040(Spliceosome)	B9RLN6.1 PF00076.20;RRM_1;	no	no
TRINITY_DN12910_c0_g6	1532	TRINITY_DN12910_c0_g6_i1;TRINITY_DN12910_c0_g6_i2	cell division protein FtsZ homolog 1, chloroplastic [Ricinus communis]	FTSZ1	Cell division protein FtsZ homolog 1, chloroplastic OS=Arabidopsis thaliana GN=FTSZ1 PE=1 SV=2	GO:0003924(GTPase activity);GO:0005198(structural molecule activity);GO:0005515(protein binding);GO:0005525(GTP binding);GO:0005874(microtubule);GO:0007017(microtubule-based process);GO:0007049(cell cycle);GO:0009507(chloroplast);GO:0009535(chloroplast th	COG0206(Essential cell division protein that forms a contractile ring structure (Z ring) at the future cell division site. The regulation of the ring assembly controls the timing and the location of cell division. One of the functions of the FtsZ ring is	NA	NA	NA	NA(NA)	S8E934.1 PF00091.23;Tubulin;	no	no
TRINITY_DN12917_c0_g4	1192	TRINITY_DN12917_c0_g4_i1;TRINITY_DN12917_c0_g4_i2	PREDICTED: protochlorophyllide reductase, chloroplastic [Eucalyptus grandis]	3PCR	Protochlorophyllide reductase, chloroplastic OS=Pisum sativum GN=3PCR PE=1 SV=1	GO:0005515(protein binding);GO:0009507(chloroplast);GO:0009534(chloroplast thylakoid);GO:0009535(chloroplast thylakoid membrane);GO:0009707(chloroplast outer membrane);GO:0009723(response to ethylene);GO:0009941(chloroplast envelope);GO:0015979(photosynth	COG1028(Dehydrogenase reductase)	K00218	protochlorophyllide reductase	EC:1.3.1.33	egr00860(Porphyrin and chlorophyll metabolism)	-	no	no
TRINITY_DN12921_c0_g1	1418	TRINITY_DN12921_c0_g1_i1	PREDICTED: 30S ribosomal protein S5, chloroplastic [Populus euphratica]	rps5	30S ribosomal protein S5, chloroplastic OS=Spinacia oleracea GN=rps5 PE=1 SV=1	GO:0003735(structural constituent of ribosome);GO:0005763(mitochondrial small ribosomal subunit);GO:0006412(translation);GO:0022627(cytosolic small ribosomal subunit)	COG0098(Located at the back of the 30S subunit body where it stabilizes the conformation of the head with respect to the body (By similarity))	K02988	small subunit ribosomal protein S5	-	hbr03010(Ribosome)	M1CWN2.1 PF03719.13;Ribosomal_S5_C;	no	no
TRINITY_DN12926_c0_g8	914	TRINITY_DN12926_c0_g8_i1	uncharacterized protein LOC110632562 isoform X1 [Hevea brasiliensis]	-	Thioredoxin M-type, chloroplastic OS=Spinacia oleracea PE=1 SV=2	GO:0000103(sulfate assimilation);GO:0006457(protein folding);GO:0009507(chloroplast);GO:0015035(protein disulfide oxidoreductase activity);GO:0016671(oxidoreductase activity, acting on a sulfur group of donors, disulfide as acceptor);GO:0034599(cellular r	COG0526(Thioredoxin)	NA	NA	NA	NA(NA)	A0A067L3M3.1 PF00085.18;Thioredoxin;	no	no
TRINITY_DN12929_c0_g1	1050	TRINITY_DN12929_c0_g1_i1;TRINITY_DN12929_c0_g1_i2	40S ribosomal protein S3a-like [Quercus suber]	GSVIVT00020038001	40S ribosomal protein S3a-1 OS=Vitis vinifera GN=GSVIVT00020038001 PE=3 SV=1	GO:0005829(cytosol)	COG1890(Ribosomal protein)	K02984	small subunit ribosomal protein S3Ae	-	hbr03010(Ribosome)	A0A0D2N7V3.1 PF01015.16;Ribosomal_S3Ae;	up	yes
TRINITY_DN12935_c1_g4	2702	TRINITY_DN12935_c1_g4_i1;TRINITY_DN12935_c1_g4_i2	probable pyridoxal 5'-phosphate synthase subunit PDX1 [Manihot esculenta]	PDX1	Probable pyridoxal 5'-phosphate synthase subunit PDX1 OS=Hevea brasiliensis GN=PDX1 PE=2 SV=1	GO:0005515(protein binding);GO:0005737(cytoplasm);GO:0005829(cytosol);GO:0005886(plasma membrane);GO:0006520(cellular amino acid metabolic process);GO:0006979(response to oxidative stress);GO:0006982(response to lipid hydroperoxide);GO:0008615(pyridoxine	COG0214(Involved in the production of pyridoxal phosphate, probably by incorporating ammonia into the pyridine ring (By similarity))	K06215	pyridoxal 5'-phosphate synthase pdxS subunit	EC:4.3.3.6	hbr00750(Vitamin B6 metabolism)	A0A0B0PHP7.1 PF01680.15;SOR_SNZ;	no	no
TRINITY_DN12939_c1_g1	1596	TRINITY_DN12939_c1_g1_i1;TRINITY_DN12939_c1_g1_i2	RNA-binding KH domain-containing protein PEPPER-like [Manihot esculenta]	PEP	RNA-binding KH domain-containing protein PEPPER OS=Arabidopsis thaliana GN=PEP PE=1 SV=1	GO:0003676(nucleic acid binding);GO:0003723(RNA binding);GO:0005515(protein binding);GO:0005634(nucleus);GO:0006355(regulation of transcription, DNA-templated);GO:0006396(RNA processing);GO:0009299(mRNA transcription);GO:0048367(shoot system development);	ENOG410XNN8(mRNA transport)	NA	NA	NA	NA(NA)	A0A067LAH0.1 PF00013.27;KH_1;	no	no
TRINITY_DN10561_c0_g4	1233	TRINITY_DN10561_c0_g4_i1	dehydroascorbate reductase [Hevea brasiliensis]	DHAR3	Glutathione S-transferase DHAR3, chloroplastic OS=Arabidopsis thaliana GN=DHAR3 PE=1 SV=1	GO:0004364(glutathione transferase activity);GO:0005737(cytoplasm);GO:0006749(glutathione metabolic process)	ENOG410ZRK6(Chloride intracellular channel)	K21888	glutathione dehydrogenase/transferase	EC:1.8.5.1 2.5.1.18	hbr00053(Ascorbate and aldarate metabolism);hbr00480(Glutathione metabolism)	M5WUW5.1 PF13410.4;GST_C_2;	down	yes
TRINITY_DN12948_c0_g5	1555	TRINITY_DN12948_c0_g5_i1	NPL4-like protein 1 isoform X1 [Populus trichocarpa]	At3g63000	NPL4-like protein 1 OS=Arabidopsis thaliana GN=At3g63000 PE=1 SV=1	GO:0005634(nucleus);GO:0006511(ubiquitin-dependent protein catabolic process);GO:0031625(ubiquitin protein ligase binding);GO:0043130(ubiquitin binding)	COG5100(Nuclear protein localization)	K14015	nuclear protein localization protein 4 homolog	-	cpap04141(Protein processing in endoplasmic reticulum)	V7D1G5.1 PF05021.13;NPL4;	up	yes
TRINITY_DN12957_c0_g2	1111	TRINITY_DN12957_c0_g2_i1;TRINITY_DN12957_c0_g2_i2	dehydrin ERD14 [Ziziphus jujuba]	-	-	GO:0005829(cytosol);GO:0009414(response to water deprivation);GO:0009631(cold acclimation);GO:0009737(response to abscisic acid);GO:0016020(membrane)	ENOG410ZBHP(dehydrin)	-	-	-	-	A9PA80.1 PF00257.17;Dehydrin;	no	no
TRINITY_DN12957_c0_g3	1265	TRINITY_DN12957_c0_g3_i1;TRINITY_DN12957_c0_g3_i2;TRINITY_DN12957_c0_g3_i3	dehydrin ERD14 [Manihot esculenta]	ERD14	Dehydrin ERD14 OS=Arabidopsis thaliana GN=ERD14 PE=1 SV=1	GO:0005829(cytosol);GO:0009414(response to water deprivation);GO:0009631(cold acclimation);GO:0009737(response to abscisic acid);GO:0016020(membrane)	ENOG410ZBHP(dehydrin)	-	-	-	-	A9PA80.1 PF00257.17;Dehydrin;	no	no
TRINITY_DN12960_c0_g2	2375	TRINITY_DN12960_c0_g2_i1;TRINITY_DN12960_c0_g2_i2;TRINITY_DN12960_c0_g2_i3;TRINITY_DN12960_c0_g2_i4	hypothetical protein GOBAR_AA36425 [Gossypium barbadense]	-	Phosphoglycerate kinase, chloroplastic OS=Nicotiana tabacum PE=2 SV=1	GO:0004618(phosphoglycerate kinase activity);GO:0004672(protein kinase activity);GO:0005524(ATP binding);GO:0005737(cytoplasm);GO:0005739(mitochondrion);GO:0005829(cytosol);GO:0006096(glycolytic process);GO:0009507(chloroplast);GO:0009536(plastid);GO:0009	COG0126(phosphoglycerate kinase)	K00927	phosphoglycerate kinase	EC:2.7.2.3	ghi00010(Glycolysis / Gluconeogenesis);ghi00710(Carbon fixation in photosynthetic organisms)	A0A0E0PPF5.1 PF00162.17;PGK;	no	no
TRINITY_DN10570_c0_g2	944	TRINITY_DN10570_c0_g2_i1;TRINITY_DN10570_c0_g2_i2;TRINITY_DN10570_c0_g2_i3;TRINITY_DN10570_c0_g2_i4	mitochondrial fission 1 protein A-like isoform X1 [Hevea brasiliensis]	FIS1A	Mitochondrial fission 1 protein A OS=Arabidopsis thaliana GN=FIS1A PE=1 SV=1	GO:0000266(mitochondrial fission);GO:0005515(protein binding);GO:0005739(mitochondrion);GO:0005741(mitochondrial outer membrane);GO:0005777(peroxisome);GO:0005778(peroxisomal membrane);GO:0006915(apoptotic process);GO:0007005(mitochondrion organization);G	ENOG4111PPH(fission 1)	NA	NA	NA	NA(NA)	D7T141.1 PF14853.4;Fis1_TPR_C;	no	no
TRINITY_DN13008_c1_g2	2652	TRINITY_DN13008_c1_g2_i1;TRINITY_DN13008_c1_g2_i2;TRINITY_DN13008_c1_g2_i3;TRINITY_DN13008_c1_g2_i4;TRINITY_DN13008_c1_g2_i5;TRINITY_DN13008_c1_g2_i6;TRINITY_DN13008_c1_g2_i7;TRINITY_DN13008_c1_g2_i8	mitochondrial outer membrane protein porin of 34 kDa [Jatropha curcas]	-	Mitochondrial outer membrane protein porin of 34 kDa OS=Solanum tuberosum PE=1 SV=2	GO:0005515(protein binding);GO:0005739(mitochondrion);GO:0005741(mitochondrial outer membrane);GO:0005773(vacuole);GO:0005774(vacuolar membrane);GO:0005794(Golgi apparatus);GO:0005886(plasma membrane);GO:0006820(anion transport);GO:0006952(defense respons	ENOG410ZBK1(voltage-dependent anion channel)	NA	NA	NA	NA(NA)	A0A067LDZ7.1 PF01459.20;Porin_3;	no	no
TRINITY_DN10574_c0_g2	1174	TRINITY_DN10574_c0_g2_i1	cytidine deaminase 1-like [Hevea brasiliensis]	CDA1	Cytidine deaminase 1 OS=Arabidopsis thaliana GN=CDA1 PE=1 SV=1	GO:0004126(cytidine deaminase activity);GO:0005829(cytosol);GO:0008270(zinc ion binding);GO:0009972(cytidine deamination)	COG0295(cytidine deaminase)	K01489	cytidine deaminase	EC:3.5.4.5	hbr00240(Pyrimidine metabolism)	A0A067K8V8.1 PF08211.10;dCMP_cyt_deam_2;	no	no
TRINITY_DN13013_c0_g4	1380	TRINITY_DN13013_c0_g4_i1;TRINITY_DN13013_c0_g4_i2	GDSL esterase/lipase At1g29670-like isoform X1 [Hevea brasiliensis]	At1g29670	GDSL esterase/lipase At1g29670 OS=Arabidopsis thaliana GN=At1g29670 PE=2 SV=1	GO:0016298(lipase activity)	ENOG410YD3P(GDSL-motif lipase hydrolase family protein)	K00679	phospholipid:diacylglycerol acyltransferase	EC:2.3.1.158	cic00561(Glycerolipid metabolism)	A0A067JNU5.1 PF00657.20;Lipase_GDSL;	no	no
TRINITY_DN13013_c0_g5	1437	TRINITY_DN13013_c0_g5_i1;TRINITY_DN13013_c0_g5_i2	GDSL esterase/lipase At5g45670-like [Manihot esculenta]	At1g29670	GDSL esterase/lipase At1g29670 OS=Arabidopsis thaliana GN=At1g29670 PE=2 SV=1	GO:0016298(lipase activity)	ENOG410YD3P(GDSL-motif lipase hydrolase family protein)	K00679	phospholipid:diacylglycerol acyltransferase	EC:2.3.1.158	cic00561(Glycerolipid metabolism)	A0A067JNU5.1 PF00657.20;Lipase_GDSL;	no	no
TRINITY_DN13030_c0_g1	2221	TRINITY_DN13030_c0_g1_i1;TRINITY_DN13030_c0_g1_i10;TRINITY_DN13030_c0_g1_i11;TRINITY_DN13030_c0_g1_i12;TRINITY_DN13030_c0_g1_i13;TRINITY_DN13030_c0_g1_i2;TRINITY_DN13030_c0_g1_i3;TRINITY_DN13030_c0_g1_i4;TRINITY_DN13030_c0_g1_i5;TRINITY_DN13030_c0_g1_i6;T	THO complex subunit 4D-like isoform X2 [Manihot esculenta]	ALY4	THO complex subunit 4D OS=Arabidopsis thaliana GN=ALY4 PE=1 SV=1	GO:0003676(nucleic acid binding);GO:0003729(mRNA binding);GO:0005654(nucleoplasm);GO:0005730(nucleolus);GO:0006952(defense response);GO:0051028(mRNA transport)	ENOG4111JAW(Polymerase (DNA-directed), delta interacting protein 3)	K12881	THO complex subunit 4	-	hbr03040(Spliceosome);hbr03013(RNA transport);hbr03015(mRNA surveillance pathway)	A0A059AEH8.1 PF00076.20;RRM_1;	no	no
TRINITY_DN13034_c0_g3	1251	TRINITY_DN13034_c0_g3_i1	PREDICTED: peroxidase P7 [Populus euphratica]	GSVIVT00023967001	Peroxidase 4 OS=Vitis vinifera GN=GSVIVT00023967001 PE=1 SV=1	GO:0004601(peroxidase activity);GO:0005515(protein binding);GO:0005576(extracellular region);GO:0005618(cell wall);GO:0005794(Golgi apparatus);GO:0005829(cytosol);GO:0006979(response to oxidative stress);GO:0009809(lignin biosynthetic process);GO:0010089(	ENOG410YETZ(peroxidase)	K00430	peroxidase	EC:1.11.1.7	jcu00940(Phenylpropanoid biosynthesis)	A0A067JCX4.1 PF00141.21;peroxidase;	down	yes
TRINITY_DN13037_c0_g2	1430	TRINITY_DN13037_c0_g2_i1;TRINITY_DN13037_c0_g2_i10;TRINITY_DN13037_c0_g2_i11;TRINITY_DN13037_c0_g2_i12;TRINITY_DN13037_c0_g2_i13;TRINITY_DN13037_c0_g2_i14;TRINITY_DN13037_c0_g2_i15;TRINITY_DN13037_c0_g2_i16;TRINITY_DN13037_c0_g2_i17;TRINITY_DN13037_c0_g2_	uncharacterized protein LOC111286068 [Durio zibethinus]	-	-	GO:0003674(molecular_function);GO:0005634(nucleus);GO:0009793(embryo development ending in seed dormancy)	ENOG410YR10(expressed protein)	-	-	-	-	-	no	no
TRINITY_DN13037_c0_g3	1652	TRINITY_DN13037_c0_g3_i1;TRINITY_DN13037_c0_g3_i2;TRINITY_DN13037_c0_g3_i3;TRINITY_DN13037_c0_g3_i4;TRINITY_DN13037_c0_g3_i5	protochlorophyllide reductase [Jatropha curcas]	PORA	Protochlorophyllide reductase, chloroplastic OS=Cucumis sativus GN=PORA PE=2 SV=1	GO:0005515(protein binding);GO:0009507(chloroplast);GO:0009534(chloroplast thylakoid);GO:0009535(chloroplast thylakoid membrane);GO:0009707(chloroplast outer membrane);GO:0009723(response to ethylene);GO:0009941(chloroplast envelope);GO:0015979(photosynth	COG1028(Dehydrogenase reductase)	K00218	protochlorophyllide reductase	EC:1.3.1.33	jcu00860(Porphyrin and chlorophyll metabolism)	B9RW29.1 PF00106.23;adh_short;	no	no
TRINITY_DN13039_c0_g3	2487	TRINITY_DN13039_c0_g3_i1;TRINITY_DN13039_c0_g3_i2;TRINITY_DN13039_c0_g3_i3;TRINITY_DN13039_c0_g3_i4;TRINITY_DN13039_c0_g3_i5;TRINITY_DN13039_c0_g3_i6	proton pump-interactor 1-like [Hevea brasiliensis]	PPI1	Proton pump-interactor 1 OS=Arabidopsis thaliana GN=PPI1 PE=1 SV=2	GO:0003729(mRNA binding);GO:0005515(protein binding);GO:0005737(cytoplasm);GO:0005783(endoplasmic reticulum);GO:0005789(endoplasmic reticulum membrane);GO:0005829(cytosol);GO:0005886(plasma membrane);GO:0009506(plasmodesma);GO:0010155(regulation of proton	ENOG4111QP9(proton pump interactor)	-	-	-	-	-	no	no
TRINITY_DN13056_c0_g3	1662	TRINITY_DN13056_c0_g3_i1;TRINITY_DN13056_c0_g3_i2;TRINITY_DN13056_c0_g3_i3;TRINITY_DN13056_c0_g3_i4;TRINITY_DN13056_c0_g3_i5;TRINITY_DN13056_c0_g3_i6	Malate dehydrogenase, glyoxysomal [Vitis vinifera]	-	Malate dehydrogenase, glyoxysomal OS=Citrullus lanatus PE=1 SV=1	GO:0005737(cytoplasm);GO:0005777(peroxisome);GO:0006097(glyoxylate cycle);GO:0006099(tricarboxylic acid cycle);GO:0006108(malate metabolic process);GO:0009507(chloroplast);GO:0016615(malate dehydrogenase activity);GO:0030060(L-malate dehydrogenase activit	COG0039(Catalyzes the reversible oxidation of malate to oxaloacetate (By similarity))	K00026	malate dehydrogenase	EC:1.1.1.37	rcu00020(Citrate cycle (TCA cycle));rcu00620(Pyruvate metabolism);rcu00630(Glyoxylate and dicarboxylate metabolism);rcu00710(Carbon fixation in photosynthetic organisms);rcu00270(Cysteine and methionine metabolism)	V4SFY0.1 PF00056.21;Ldh_1_N;	no	no
TRINITY_DN13059_c1_g2	1253	TRINITY_DN13059_c1_g2_i1;TRINITY_DN13059_c1_g2_i10;TRINITY_DN13059_c1_g2_i11;TRINITY_DN13059_c1_g2_i2;TRINITY_DN13059_c1_g2_i3;TRINITY_DN13059_c1_g2_i4;TRINITY_DN13059_c1_g2_i5;TRINITY_DN13059_c1_g2_i6;TRINITY_DN13059_c1_g2_i7;TRINITY_DN13059_c1_g2_i8;TRI	citrate-binding protein-like [Hevea brasiliensis]	CBP	Citrate-binding protein OS=Hevea brasiliensis GN=CBP PE=1 SV=1	-	ENOG410YG69(Alginate lyase)	-	-	-	-	V4SKA7.1 PF08787.9;Alginate_lyase2;	no	no
TRINITY_DN13064_c0_g7	1833	TRINITY_DN13064_c0_g7_i1	PREDICTED: cytochrome f-like [Capsicum annuum]	petA	Cytochrome f OS=Manihot esculenta GN=petA PE=3 SV=1	GO:0009536(plastid)	ENOG410XPEN(Component of the cytochrome b6-f complex, which mediates electron transfer between photosystem II (PSII) and photosystem I (PSI), cyclic electron flow around PSI, and state transitions (By similarity))	K02634	apocytochrome f	-	cann00195(Photosynthesis)	E3W0K5.1 PF03040.12;CemA;	no	no
TRINITY_DN13068_c0_g4	1238	TRINITY_DN13068_c0_g4_i1;TRINITY_DN13068_c0_g4_i2;TRINITY_DN13068_c0_g4_i3;TRINITY_DN13068_c0_g4_i4;TRINITY_DN13068_c0_g4_i5	vesicle transport v-SNARE 13 [Ricinus communis]	VTI13	Vesicle transport v-SNARE 13 OS=Arabidopsis thaliana GN=VTI13 PE=2 SV=1	GO:0000149(SNARE binding);GO:0005484(SNAP receptor activity);GO:0005789(endoplasmic reticulum membrane);GO:0005794(Golgi apparatus);GO:0006623(protein targeting to vacuole);GO:0006888(ER to Golgi vesicle-mediated transport);GO:0006891(intra-Golgi vesicle-	ENOG4111J90(vesicle transport through interaction with t-SNAREs)	K08493	vesicle transport through interaction with t-SNAREs 1	-	rcu04130(SNARE interactions in vesicular transport)	A0A0D2V269.1 PF05008.13;V-SNARE;	no	no
TRINITY_DN13075_c0_g1	2315	TRINITY_DN13075_c0_g1_i1;TRINITY_DN13075_c0_g1_i2;TRINITY_DN13075_c0_g1_i3;TRINITY_DN13075_c0_g1_i4;TRINITY_DN13075_c0_g1_i5;TRINITY_DN13075_c0_g1_i6;TRINITY_DN13075_c0_g1_i7;TRINITY_DN13075_c0_g1_i8	unknown [Populus trichocarpa]	GAPN	NADP-dependent glyceraldehyde-3-phosphate dehydrogenase OS=Nicotiana plumbaginifolia GN=GAPN PE=2 SV=1	GO:0004029(aldehyde dehydrogenase (NAD) activity);GO:0004777(succinate-semialdehyde dehydrogenase (NAD+) activity);GO:0009013(succinate-semialdehyde dehydrogenase [NAD(P)+] activity)	COG1012(Dehydrogenase)	K00131	glyceraldehyde-3-phosphate dehydrogenase (NADP+)	EC:1.2.1.9	jcu00010(Glycolysis / Gluconeogenesis);jcu00030(Pentose phosphate pathway)	V4U239.1 PF00171.20;Aldedh;	no	no
TRINITY_DN13078_c0_g3	2748	TRINITY_DN13078_c0_g3_i1;TRINITY_DN13078_c0_g3_i2;TRINITY_DN13078_c0_g3_i3;TRINITY_DN13078_c0_g3_i4;TRINITY_DN13078_c0_g3_i5;TRINITY_DN13078_c0_g3_i6;TRINITY_DN13078_c0_g3_i7;TRINITY_DN13078_c0_g3_i8	protein IQ-DOMAIN 31 [Ricinus communis]	IQD31	Protein IQ-DOMAIN 31 OS=Arabidopsis thaliana GN=IQD31 PE=1 SV=1	GO:0005516(calmodulin binding);GO:0005634(nucleus);GO:0005829(cytosol);GO:0005875(microtubule associated complex);GO:0005886(plasma membrane);GO:0008150(biological_process)	ENOG410YAVA(IQ-domain)	-	-	-	-	A0A067K555.1 PF13178.4;DUF4005;	no	no
TRINITY_DN13082_c0_g1	3377	TRINITY_DN13082_c0_g1_i1;TRINITY_DN13082_c0_g1_i2	mannosylglycoprotein endo-beta-mannosidase isoform X2 [Populus trichocarpa]	EBM	Mannosylglycoprotein endo-beta-mannosidase OS=Lilium longiflorum GN=EBM PE=1 SV=4	GO:0004567(beta-mannosidase activity);GO:0005975(carbohydrate metabolic process);GO:0043231(intracellular membrane-bounded organelle)	COG3250(hydrolase family 2)	NA	NA	NA	NA(NA)	B9RF62.1 PF00703.19;Glyco_hydro_2;	no	no
TRINITY_DN13087_c0_g1	1197	TRINITY_DN13087_c0_g1_i1;TRINITY_DN13087_c0_g1_i2;TRINITY_DN13087_c0_g1_i3;TRINITY_DN13087_c0_g1_i4;TRINITY_DN13087_c0_g1_i5;TRINITY_DN13087_c0_g1_i6	LOW QUALITY PROTEIN: probable mediator of RNA polymerase II transcription subunit 36b [Ricinus communis]	MED36A	Mediator of RNA polymerase II transcription subunit 36a OS=Arabidopsis thaliana GN=MED36A PE=1 SV=2	GO:0000494(box C/D snoRNA 3'-end processing);GO:0003723(RNA binding);GO:0008649(rRNA methyltransferase activity);GO:0015030(Cajal body);GO:0031167(rRNA methylation);GO:0031428(box C/D snoRNP complex);GO:0032040(small-subunit processome);GO:1990258(histone	COG1889(Involved in pre-rRNA and tRNA processing. Utilizes the methyl donor S-adenosyl-L-methionine to catalyze the site-specific 2'-hydroxyl methylation of ribose moieties in rRNA and tRNA. Site specificity is provided by a guide RNA that base pairs with	K14563	rRNA 2'-O-methyltransferase fibrillarin	EC:2.1.1.-	rcu03008(Ribosome biogenesis in eukaryotes)	B9IDB8.2 PF01269.15;Fibrillarin;	up	yes
TRINITY_DN13088_c0_g2	2040	TRINITY_DN13088_c0_g2_i1;TRINITY_DN13088_c0_g2_i10;TRINITY_DN13088_c0_g2_i11;TRINITY_DN13088_c0_g2_i12;TRINITY_DN13088_c0_g2_i13;TRINITY_DN13088_c0_g2_i14;TRINITY_DN13088_c0_g2_i15;TRINITY_DN13088_c0_g2_i16;TRINITY_DN13088_c0_g2_i17;TRINITY_DN13088_c0_g2_	putative L-ascorbate peroxidase 6 isoform X4 [Hevea brasiliensis]	APX6	Putative L-ascorbate peroxidase 6 OS=Arabidopsis thaliana GN=APX6 PE=2 SV=1	GO:0000302(response to reactive oxygen species);GO:0004130(cytochrome-c peroxidase activity);GO:0004601(peroxidase activity);GO:0005576(extracellular region);GO:0005829(cytosol);GO:0009845(seed germination);GO:0010431(seed maturation);GO:0016688(L-ascorba	COG0376(Bifunctional enzyme with both catalase and broad- spectrum peroxidase activity (By similarity))	K00434	L-ascorbate peroxidase	EC:1.11.1.11	hbr00053(Ascorbate and aldarate metabolism);hbr00480(Glutathione metabolism)	A0A067KBJ4.1 PF00141.21;peroxidase;	no	no
TRINITY_DN13090_c0_g1	2131	TRINITY_DN13090_c0_g1_i1;TRINITY_DN13090_c0_g1_i2;TRINITY_DN13090_c0_g1_i3;TRINITY_DN13090_c0_g1_i4;TRINITY_DN13090_c0_g1_i5	biotin carboxylase 2, chloroplastic [Hevea brasiliensis]	POPTRDRAFT_831870	Biotin carboxylase 1, chloroplastic OS=Populus trichocarpa GN=POPTRDRAFT_831870 PE=2 SV=1	GO:0003989(acetyl-CoA carboxylase activity);GO:0006633(fatty acid biosynthetic process)	COG0439(acetyl-CoA carboxylase biotin carboxylase)	K01961	acetyl-CoA carboxylase, biotin carboxylase subunit	EC:6.4.1.2 6.3.4.14	hbr00620(Pyruvate metabolism);hbr00640(Propanoate metabolism);hbr00061(Fatty acid biosynthesis)	A0A022R4R3.1 PF02786.15;CPSase_L_D2;	no	no
TRINITY_DN10585_c0_g4	1361	TRINITY_DN10585_c0_g4_i1;TRINITY_DN10585_c0_g4_i2	acetyltransferase At1g77540 [Ricinus communis]	At1g77540	Acetyltransferase At1g77540 OS=Arabidopsis thaliana GN=At1g77540 PE=1 SV=2	GO:0004402(histone acetyltransferase activity);GO:0005634(nucleus);GO:0005777(peroxisome);GO:0005829(cytosol);GO:0008150(biological_process)	ENOG41124TU(NA)	NA	NA	NA	NA(NA)	K4CM04.1 PF14542.4;Acetyltransf_CG;	no	no
TRINITY_DN13099_c0_g1	1324	TRINITY_DN13099_c0_g1_i1;TRINITY_DN13099_c0_g1_i10;TRINITY_DN13099_c0_g1_i11;TRINITY_DN13099_c0_g1_i12;TRINITY_DN13099_c0_g1_i2;TRINITY_DN13099_c0_g1_i3;TRINITY_DN13099_c0_g1_i4;TRINITY_DN13099_c0_g1_i5;TRINITY_DN13099_c0_g1_i6;TRINITY_DN13099_c0_g1_i7;TR	hypothetical protein DVH24_019795 [Malus domestica]	PAG1	Proteasome subunit alpha type-3 OS=Spinacia oleracea GN=PAG1 PE=2 SV=1	GO:0000502(proteasome complex);GO:0004175(endopeptidase activity);GO:0004298(threonine-type endopeptidase activity);GO:0005634(nucleus);GO:0005737(cytoplasm);GO:0005773(vacuole);GO:0005774(vacuolar membrane);GO:0005829(cytosol);GO:0005839(proteasome core	ENOG410XP01(The proteasome is a multicatalytic proteinase complex which is characterized by its ability to cleave peptides with Arg, Phe, Tyr, Leu, and Glu adjacent to the leaving group at neutral or slightly basic pH. The proteasome has an ATP-dependent	K02727	20S proteasome subunit alpha 7	EC:3.4.25.1	hbr03050(Proteasome)	A0A0D2TLD1.1 PF00227.24;Proteasome;	no	no
TRINITY_DN13103_c0_g1	909	TRINITY_DN13103_c0_g1_i1;TRINITY_DN13103_c0_g1_i2;TRINITY_DN13103_c0_g1_i3;TRINITY_DN13103_c0_g1_i4	Actin depolymerizing factor 4 isoform 2, partial [Theobroma cacao]	ADF2	Actin-depolymerizing factor 2 OS=Petunia hybrida GN=ADF2 PE=2 SV=1	GO:0003779(actin binding);GO:0005622(intracellular);GO:0005737(cytoplasm);GO:0007015(actin filament organization);GO:0009507(chloroplast);GO:0015629(actin cytoskeleton);GO:0030042(actin filament depolymerization)	ENOG41122P5(actin-depolymerizing factor)	NA	NA	NA	NA(NA)	A0A067GBP6.1 PF00241.18;Cofilin_ADF;	no	no
TRINITY_DN13110_c0_g2	1792	TRINITY_DN13110_c0_g2_i1;TRINITY_DN13110_c0_g2_i2;TRINITY_DN13110_c0_g2_i3;TRINITY_DN13110_c0_g2_i4;TRINITY_DN13110_c0_g2_i5;TRINITY_DN13110_c0_g2_i6;TRINITY_DN13110_c0_g2_i7;TRINITY_DN13110_c0_g2_i8	formate dehydrogenase, mitochondrial [Jatropha curcas]	FDH1	Formate dehydrogenase, chloroplastic/mitochondrial OS=Arabidopsis thaliana GN=FDH1 PE=1 SV=1	GO:0004617(phosphoglycerate dehydrogenase activity);GO:0005739(mitochondrion);GO:0008863(formate dehydrogenase (NAD+) activity);GO:0009070(serine family amino acid biosynthetic process);GO:0042183(formate catabolic process)	COG1052(Dehydrogenase)	K00122	formate dehydrogenase	EC:1.17.1.9	jcu00630(Glyoxylate and dicarboxylate metabolism)	D7TWQ4.1 PF00389.28;2-Hacid_dh;	no	no
TRINITY_DN13124_c0_g1	1495	TRINITY_DN13124_c0_g1_i1;TRINITY_DN13124_c0_g1_i2	D-3-phosphoglycerate dehydrogenase 1, chloroplastic [Jatropha curcas]	PGDH1	D-3-phosphoglycerate dehydrogenase 1, chloroplastic OS=Arabidopsis thaliana GN=PGDH1 PE=1 SV=1	GO:0004617(phosphoglycerate dehydrogenase activity);GO:0009070(serine family amino acid biosynthetic process)	COG0111(Dehydrogenase)	K00058	D-3-phosphoglycerate dehydrogenase / 2-oxoglutarate reductase	EC:1.1.1.95 1.1.1.399	jcu00260(Glycine, serine and threonine metabolism)	B9GNT1.1 PF00389.28;2-Hacid_dh;	no	no
TRINITY_DN13128_c0_g2	1176	TRINITY_DN13128_c0_g2_i1;TRINITY_DN13128_c0_g2_i2;TRINITY_DN13128_c0_g2_i3;TRINITY_DN13128_c0_g2_i4;TRINITY_DN13128_c0_g2_i5;TRINITY_DN13128_c0_g2_i6;TRINITY_DN13128_c0_g2_i7;TRINITY_DN13128_c0_g2_i8;TRINITY_DN13128_c0_g2_i9	uncharacterized protein LOC110630131 [Manihot esculenta]	usf	Protein usf OS=Aquifex pyrophilus GN=usf PE=4 SV=1	GO:0005737(cytoplasm);GO:0005829(cytosol);GO:0009507(chloroplast);GO:0010043(response to zinc ion);GO:0016787(hydrolase activity)	COG0412(dienelactone hydrolase)	-	-	-	-	M5X621.1 PF01738.16;DLH;	no	no
TRINITY_DN13128_c0_g3	1523	TRINITY_DN13128_c0_g3_i1;TRINITY_DN13128_c0_g3_i2;TRINITY_DN13128_c0_g3_i3;TRINITY_DN13128_c0_g3_i4;TRINITY_DN13128_c0_g3_i5	cell division protein FtsZ homolog 2-1, chloroplastic [Jatropha curcas]	FTSZ2-1	Cell division protein FtsZ homolog 2-1, chloroplastic OS=Arabidopsis thaliana GN=FTSZ2-1 PE=1 SV=2	GO:0003924(GTPase activity);GO:0005198(structural molecule activity);GO:0005515(protein binding);GO:0005525(GTP binding);GO:0005737(cytoplasm);GO:0009507(chloroplast);GO:0009534(chloroplast thylakoid);GO:0009570(chloroplast stroma);GO:0010020(chloroplast	COG0206(Essential cell division protein that forms a contractile ring structure (Z ring) at the future cell division site. The regulation of the ring assembly controls the timing and the location of cell division. One of the functions of the FtsZ ring is	NA	NA	NA	NA(NA)	A0A0A0KIN9.1 PF00091.23;Tubulin;	no	no
TRINITY_DN13131_c0_g4	982	TRINITY_DN13131_c0_g4_i1;TRINITY_DN13131_c0_g4_i2;TRINITY_DN13131_c0_g4_i3	PREDICTED: small ubiquitin-related modifier 1 [Vitis vinifera]	SUMO2	Small ubiquitin-related modifier 2 OS=Arabidopsis thaliana GN=SUMO2 PE=1 SV=1	GO:0005634(nucleus);GO:0016925(protein sumoylation);GO:0031386(protein tag)	COG5227(smt3 suppressor of mif two 3 homolog)	K12160	small ubiquitin-related modifier	-	vvi03013(RNA transport)	P55852.2 PF00240.21;ubiquitin;	no	no
TRINITY_DN13132_c1_g3	1804	TRINITY_DN13132_c1_g3_i1;TRINITY_DN13132_c1_g3_i2;TRINITY_DN13132_c1_g3_i3;TRINITY_DN13132_c1_g3_i4	PREDICTED: uncharacterized protein DDB_G0288133 [Vitis vinifera]	RggA	RGG repeats nuclear RNA binding protein A (Fragment) OS=Nicotiana tabacum GN=RggA PE=2 SV=1	GO:0003723(RNA binding);GO:0003729(mRNA binding);GO:0005634(nucleus);GO:0005737(cytoplasm);GO:0006970(response to osmotic stress);GO:0009651(response to salt stress);GO:0009737(response to abscisic acid);GO:0009738(abscisic acid-activated signaling pathwa	ENOG410YBHR(SERPINE1 mRNA binding protein 1)	NA	NA	NA	NA(NA)	D7TGB6.1 PF04774.13;HABP4_PAI-RBP1;	no	no
TRINITY_DN13133_c0_g2	2421	TRINITY_DN13133_c0_g2_i1;TRINITY_DN13133_c0_g2_i2;TRINITY_DN13133_c0_g2_i3;TRINITY_DN13133_c0_g2_i4;TRINITY_DN13133_c0_g2_i5;TRINITY_DN13133_c0_g2_i6	peptidyl-prolyl cis-trans isomerase FKBP62 [Jatropha curcas]	FKBP65	Peptidyl-prolyl cis-trans isomerase FKBP65 OS=Arabidopsis thaliana GN=FKBP65 PE=1 SV=1	GO:0003755(peptidyl-prolyl cis-trans isomerase activity);GO:0005528(FK506 binding);GO:0005789(endoplasmic reticulum membrane);GO:0061077(chaperone-mediated protein folding)	COG0545(Peptidyl-prolyl cis-trans isomerase)	NA	NA	NA	NA(NA)	R0G9A4.1 PF00254.26;FKBP_C;	no	no
TRINITY_DN13147_c1_g3	1514	TRINITY_DN13147_c1_g3_i1;TRINITY_DN13147_c1_g3_i2;TRINITY_DN13147_c1_g3_i3;TRINITY_DN13147_c1_g3_i4	PREDICTED: membrane-associated 30 kDa protein, chloroplastic-like [Populus euphratica]	IM30	Membrane-associated 30 kDa protein, chloroplastic OS=Pisum sativum GN=IM30 PE=2 SV=1	GO:0005829(cytosol);GO:0009535(chloroplast thylakoid membrane);GO:0010027(thylakoid membrane organization)	COG1842(Phage shock protein A)	NA	NA	NA	NA(NA)	U5G6Z7.1 PF04012.10;PspA_IM30;	no	no
TRINITY_DN13147_c1_g4	2249	TRINITY_DN13147_c1_g4_i1;TRINITY_DN13147_c1_g4_i2;TRINITY_DN13147_c1_g4_i3;TRINITY_DN13147_c1_g4_i4;TRINITY_DN13147_c1_g4_i5	PREDICTED: membrane-associated 30 kDa protein, chloroplastic-like isoform X1 [Gossypium arboreum]	IM30	Membrane-associated 30 kDa protein, chloroplastic OS=Pisum sativum GN=IM30 PE=2 SV=1	GO:0005829(cytosol);GO:0009535(chloroplast thylakoid membrane);GO:0010027(thylakoid membrane organization)	COG1842(Phage shock protein A)	NA	NA	NA	NA(NA)	M5XRG9.1 PF04012.10;PspA_IM30;	up	yes
TRINITY_DN13155_c0_g2	1683	TRINITY_DN13155_c0_g2_i1;TRINITY_DN13155_c0_g2_i2;TRINITY_DN13155_c0_g2_i3;TRINITY_DN13155_c0_g2_i4;TRINITY_DN13155_c0_g2_i5;TRINITY_DN13155_c0_g2_i6	PREDICTED: thylakoid lumenal 29 kDa protein, chloroplastic isoform X1 [Populus euphratica]	CLEB3J9	Thylakoid lumenal 29 kDa protein, chloroplastic OS=Solanum lycopersicum GN=CLEB3J9 PE=3 SV=1	GO:0000302(response to reactive oxygen species);GO:0004130(cytochrome-c peroxidase activity);GO:0004601(peroxidase activity);GO:0005515(protein binding);GO:0005634(nucleus);GO:0005737(cytoplasm);GO:0006979(response to oxidative stress);GO:0009507(chloropl	ENOG410XSAA(Thylakoid lumenal 29 kDa protein)	K00434	L-ascorbate peroxidase	EC:1.11.1.11	jcu00053(Ascorbate and aldarate metabolism);jcu00480(Glutathione metabolism)	A0A0J8D1W8.1 PF00141.21;peroxidase;	no	no
TRINITY_DN10085_c0_g1	1411	TRINITY_DN10085_c0_g1_i1;TRINITY_DN10085_c0_g1_i2;TRINITY_DN10085_c0_g1_i3;TRINITY_DN10085_c0_g1_i4;TRINITY_DN10085_c0_g1_i5	28 kDa ribonucleoprotein, chloroplastic [Manihot esculenta]	-	33 kDa ribonucleoprotein, chloroplastic OS=Nicotiana sylvestris PE=1 SV=1	GO:0000245(spliceosomal complex assembly);GO:0015030(Cajal body)	ENOG410YG9K(RNA recognition motif. (a.k.a. RRM, RBD, or RNP domain))	K13126	polyadenylate-binding protein	-	hbr03013(RNA transport);hbr03015(mRNA surveillance pathway);hbr03018(RNA degradation)	I1L4X7.1 PF00076.20;RRM_1;	no	no
TRINITY_DN13169_c0_g3	1183	TRINITY_DN13169_c0_g3_i1;TRINITY_DN13169_c0_g3_i2;TRINITY_DN13169_c0_g3_i3;TRINITY_DN13169_c0_g3_i4;TRINITY_DN13169_c0_g3_i5	cysteine synthase, chloroplastic/chromoplastic-like [Herrania umbratica]	-	Cysteine synthase, chloroplastic/chromoplastic OS=Solanum tuberosum PE=2 SV=1	GO:0004124(cysteine synthase activity);GO:0005737(cytoplasm);GO:0006535(cysteine biosynthetic process from serine);GO:0030170(pyridoxal phosphate binding)	COG0031(cysteine biosynthetic process from serine)	K01738	cysteine synthase	EC:2.5.1.47	tcc00920(Sulfur metabolism);tcc00270(Cysteine and methionine metabolism)	A0A0B0NFY6.1 PF00291.23;PALP;	no	no
TRINITY_DN13767_c1_g2	714	TRINITY_DN13767_c1_g2_i1;TRINITY_DN13767_c1_g2_i2;TRINITY_DN13767_c1_g2_i3	60S ribosomal protein L32-1 [Manihot esculenta]	RPL32A	60S ribosomal protein L32-1 OS=Arabidopsis thaliana GN=RPL32A PE=2 SV=2	GO:0022625(cytosolic large ribosomal subunit)	COG1717((ribosomal) protein)	K02912	large subunit ribosomal protein L32e	-	hbr03010(Ribosome)	V4TB21.1 PF01655.16;Ribosomal_L32e;	no	no
TRINITY_DN10593_c0_g2	1067	TRINITY_DN10593_c0_g2_i1;TRINITY_DN10593_c0_g2_i2	Endo-beta-N-acetylglucosaminidase [Trema orientale]	-	Acidic endochitinase OS=Nicotiana tabacum PE=1 SV=1	GO:0004568(chitinase activity);GO:0005576(extracellular region);GO:0006032(chitin catabolic process);GO:0008061(chitin binding)	COG1412(small subunit (SSU) processome component, homolog)	K01183	chitinase	EC:3.2.1.14	cit00520(Amino sugar and nucleotide sugar metabolism)	V4S7U0.1 PF00704.26;Glyco_hydro_18;	no	no
TRINITY_DN10593_c0_g4	1298	TRINITY_DN10593_c0_g4_i1;TRINITY_DN10593_c0_g4_i2;TRINITY_DN10593_c0_g4_i3;TRINITY_DN10593_c0_g4_i4;TRINITY_DN10593_c0_g4_i5;TRINITY_DN10593_c0_g4_i6	hypothetical protein POPTR_002G158700 [Populus trichocarpa]	Os04g0364800	Putative ripening-related protein 1 OS=Oryza sativa subsp. japonica GN=Os04g0364800 PE=3 SV=2	-	ENOG41114GU(ripening-related protein 2-like)	NA	NA	NA	NA(NA)	M1AEA4.1 PF00967.15;Barwin;	down	yes
TRINITY_DN10594_c0_g4	775	TRINITY_DN10594_c0_g4_i1;TRINITY_DN10594_c0_g4_i2	uncharacterized protein LOC110669772 [Hevea brasiliensis]	-	-	GO:0003674(molecular_function);GO:0005739(mitochondrion);GO:0008150(biological_process);GO:0009507(chloroplast);GO:0009535(chloroplast thylakoid membrane);GO:0009536(plastid);GO:0009706(chloroplast inner membrane);GO:0009941(chloroplast envelope);GO:00160	ENOG410YMEN(NA)	-	-	-	-	-	no	no
TRINITY_DN13196_c0_g2	640	TRINITY_DN13196_c0_g2_i1;TRINITY_DN13196_c0_g2_i2	PREDICTED: NADH dehydrogenase [ubiquinone] iron-sulfur protein 6, mitochondrial-like [Gossypium hirsutum]	At3g03070	NADH dehydrogenase [ubiquinone] iron-sulfur protein 6, mitochondrial OS=Arabidopsis thaliana GN=At3g03070 PE=3 SV=1	GO:0005747(mitochondrial respiratory chain complex I);GO:0006120(mitochondrial electron transport, NADH to ubiquinone)	ENOG4111W6X(electron transport chain)	K03939	NADH dehydrogenase (ubiquinone) Fe-S protein 6	-	ghi00190(Oxidative phosphorylation)	U5D020.1 PF10276.7;zf-CHCC;	no	no
TRINITY_DN13199_c1_g4	1942	TRINITY_DN13199_c1_g4_i1;TRINITY_DN13199_c1_g4_i2;TRINITY_DN13199_c1_g4_i3;TRINITY_DN13199_c1_g4_i4;TRINITY_DN13199_c1_g4_i5;TRINITY_DN13199_c1_g4_i6	glutamate-1-semialdehyde 2,1-aminomutase 2, chloroplastic [Ricinus communis]	GSA	Glutamate-1-semialdehyde 2,1-aminomutase, chloroplastic OS=Nicotiana tabacum GN=GSA PE=2 SV=1	GO:0006779(porphyrin-containing compound biosynthetic process);GO:0009507(chloroplast);GO:0030170(pyridoxal phosphate binding);GO:0042802(identical protein binding)	COG0001(Glutamate-1-semialdehyde aminotransferase)	K01845	glutamate-1-semialdehyde 2,1-aminomutase	EC:5.4.3.8	rcu00860(Porphyrin and chlorophyll metabolism)	A0A067JFF9.1 PF00202.19;Aminotran_3;	no	no
TRINITY_DN13213_c0_g1	2096	TRINITY_DN13213_c0_g1_i1;TRINITY_DN13213_c0_g1_i10;TRINITY_DN13213_c0_g1_i11;TRINITY_DN13213_c0_g1_i12;TRINITY_DN13213_c0_g1_i13;TRINITY_DN13213_c0_g1_i14;TRINITY_DN13213_c0_g1_i15;TRINITY_DN13213_c0_g1_i16;TRINITY_DN13213_c0_g1_i17;TRINITY_DN13213_c0_g1_	uracil phosphoribosyltransferase isoform X1 [Hevea brasiliensis]	UPP	Uracil phosphoribosyltransferase OS=Nicotiana tabacum GN=UPP PE=2 SV=1	GO:0004849(uridine kinase activity);GO:0005829(cytosol);GO:0006206(pyrimidine nucleobase metabolic process);GO:0009507(chloroplast);GO:0043097(pyrimidine nucleoside salvage)	COG0035(Catalyzes the conversion of uracil and 5-phospho-alpha- D-ribose 1-diphosphate (PRPP) to UMP and diphosphate (By similarity))	K00761	uracil phosphoribosyltransferase	EC:2.4.2.9	hbr00240(Pyrimidine metabolism)	A0A0A0KZP7.1 PF14681.4;UPRTase;	down	yes
TRINITY_DN13214_c0_g8	5281	TRINITY_DN13214_c0_g8_i1	ATP synthase CF1 alpha subunit (chloroplast) [Passiflora edulis]	atpA	ATP synthase subunit alpha, chloroplastic OS=Manihot esculenta GN=atpA PE=3 SV=1	GO:0009536(plastid)	COG0056(Produces ATP from ADP in the presence of a proton gradient across the membrane. The alpha chain is a regulatory subunit (By similarity))	K02111	F-type H+-transporting ATPase subunit alpha	EC:3.6.3.14	hbr00190(Oxidative phosphorylation);hbr00195(Photosynthesis)	A4GYP7.1 PF00318.18;Ribosomal_S2;	no	no
TRINITY_DN13226_c1_g4	1074	TRINITY_DN13226_c1_g4_i1	PREDICTED: elongation factor 1-beta 2-like [Tarenaya hassleriana]	At5g12110	Elongation factor 1-beta 1 OS=Arabidopsis thaliana GN=At5g12110 PE=2 SV=2	GO:0003746(translation elongation factor activity);GO:0005794(Golgi apparatus);GO:0005853(eukaryotic translation elongation factor 1 complex);GO:0005886(plasma membrane);GO:0006414(translational elongation)	COG2092(Promotes the exchange of GDP for GTP in EF-1-alpha GDP, thus allowing the regeneration of EF-1-alpha GTP that could then be used to form the ternary complex EF-1-alpha GTP AAtRNA (By similarity))	NA	NA	NA	NA(NA)	C6T034.1 PF00736.17;EF1_GNE;	no	no
TRINITY_DN13228_c0_g2	1890	TRINITY_DN13228_c0_g2_i1;TRINITY_DN13228_c0_g2_i10;TRINITY_DN13228_c0_g2_i2;TRINITY_DN13228_c0_g2_i3;TRINITY_DN13228_c0_g2_i4;TRINITY_DN13228_c0_g2_i5;TRINITY_DN13228_c0_g2_i6;TRINITY_DN13228_c0_g2_i7;TRINITY_DN13228_c0_g2_i8;TRINITY_DN13228_c0_g2_i9	hypothetical protein JCGZ_04429 [Jatropha curcas]	-	-	GO:0008150(biological_process);GO:0009507(chloroplast);GO:0009535(chloroplast thylakoid membrane);GO:0009579(thylakoid)	ENOG4111Q50(NA)	-	-	-	-	-	no	no
TRINITY_DN13245_c0_g3	1318	TRINITY_DN13245_c0_g3_i1	peroxisomal and mitochondrial division factor 2-like [Hevea brasiliensis]	-	-	-	ENOG410ZPUS(NA)	-	-	-	-	-	no	no
TRINITY_DN13246_c1_g1	1739	TRINITY_DN13246_c1_g1_i1;TRINITY_DN13246_c1_g1_i2;TRINITY_DN13246_c1_g1_i3;TRINITY_DN13246_c1_g1_i4;TRINITY_DN13246_c1_g1_i5;TRINITY_DN13246_c1_g1_i6;TRINITY_DN13246_c1_g1_i7;TRINITY_DN13246_c1_g1_i8	protein MET1, chloroplastic-like [Hevea brasiliensis]	-	-	GO:0005515(protein binding);GO:0009416(response to light stimulus);GO:0009507(chloroplast);GO:0009523(photosystem II);GO:0009534(chloroplast thylakoid);GO:0009535(chloroplast thylakoid membrane);GO:0009570(chloroplast stroma);GO:0009575(chromoplast stroma	ENOG410ZEH3(NA)	-	-	-	-	A0A096T653.1 PF13432.4;TPR_16;	no	no
TRINITY_DN13251_c0_g7	2377	TRINITY_DN13251_c0_g7_i1;TRINITY_DN13251_c0_g7_i2	heat shock 70 kDa protein, mitochondrial isoform X1 [Hevea brasiliensis]	-	Heat shock 70 kDa protein, mitochondrial OS=Phaseolus vulgaris PE=2 SV=1	GO:0005524(ATP binding);GO:0005618(cell wall);GO:0005739(mitochondrion);GO:0005759(mitochondrial matrix);GO:0005774(vacuolar membrane);GO:0005794(Golgi apparatus);GO:0006457(protein folding);GO:0009408(response to heat);GO:0009507(chloroplast);GO:0009615(	COG0443(Heat shock protein)	K04043	molecular chaperone DnaK	-	hbr03018(RNA degradation)	B9HN74.1 PF00012.18;HSP70;	no	no
TRINITY_DN13263_c0_g1	1372	TRINITY_DN13263_c0_g1_i1;TRINITY_DN13263_c0_g1_i2;TRINITY_DN13263_c0_g1_i3;TRINITY_DN13263_c0_g1_i4	Vacuolar protein sorting 46.1 isoform 2, partial [Theobroma cacao]	CHMP1A	ESCRT-related protein CHMP1A OS=Arabidopsis thaliana GN=CHMP1A PE=1 SV=1	GO:0000578(embryonic axis specification);GO:0005515(protein binding);GO:0006914(autophagy);GO:0007034(vacuolar transport);GO:0009793(embryo development ending in seed dormancy);GO:0010008(endosome membrane);GO:0015031(protein transport);GO:0016192(vesicle	COG5491(Charged multivesicular body protein)	K12197	charged multivesicular body protein 1	-	tcc04144(Endocytosis)	B9GH53.1 PF03357.19;Snf7;	no	no
TRINITY_DN13270_c0_g4	978	TRINITY_DN13270_c0_g4_i1;TRINITY_DN13270_c0_g4_i2;TRINITY_DN13270_c0_g4_i3;TRINITY_DN13270_c0_g4_i4	PREDICTED: cyanate hydratase [Nelumbo nucifera]	CYN	Cyanate hydratase OS=Populus trichocarpa GN=CYN PE=3 SV=1	GO:0008824(cyanate hydratase activity)	COG1513(Catalyzes the reaction of cyanate with bicarbonate to produce ammonia and carbon dioxide (By similarity))	K01725	cyanate lyase	EC:4.2.1.104	nnu00910(Nitrogen metabolism)	B9T3R0.1 PF02560.12;Cyanate_lyase;	no	no
TRINITY_DN13271_c0_g2	2538	TRINITY_DN13271_c0_g2_i1;TRINITY_DN13271_c0_g2_i2;TRINITY_DN13271_c0_g2_i3;TRINITY_DN13271_c0_g2_i4;TRINITY_DN13271_c0_g2_i5;TRINITY_DN13271_c0_g2_i6;TRINITY_DN13271_c0_g2_i7;TRINITY_DN13271_c0_g2_i8	serine/arginine-rich splicing factor RSZ22A-like isoform X1 [Hevea brasiliensis]	RSZP21	Serine/arginine-rich splicing factor RSZ21 OS=Oryza sativa subsp. japonica GN=RSZP21 PE=2 SV=1	GO:0000398(mRNA splicing, via spliceosome);GO:0003676(nucleic acid binding);GO:0005515(protein binding);GO:0005634(nucleus);GO:0005681(spliceosomal complex);GO:0008270(zinc ion binding);GO:0016607(nuclear speck)	ENOG4111N8Y(serine arginine-rich splicing factor)	K12896	splicing factor, arginine/serine-rich 7	-	hbr03040(Spliceosome)	B9ILD8.1 PF00076.20;RRM_1;	no	no
TRINITY_DN13274_c1_g3	1276	TRINITY_DN13274_c1_g3_i1;TRINITY_DN13274_c1_g3_i2	eukaryotic translation initiation factor-like [Hevea brasiliensis]	Os04g0499300	Eukaryotic translation initiation factor isoform 4G-1 OS=Oryza sativa subsp. japonica GN=Os04g0499300 PE=2 SV=2	GO:0009615(response to virus);GO:0046740(transport of virus in host, cell to cell)	ENOG410XS4P(Eukaryotic translation initiation factor 4 gamma)	K03260	translation initiation factor 4G	-	hbr03013(RNA transport)	K4CB52.1 PF02854.17;MIF4G;	no	no
TRINITY_DN13282_c0_g2	993	TRINITY_DN13282_c0_g2_i1	hypothetical protein POPTR_001G088300 [Populus trichocarpa]	RPS6	30S ribosomal protein S6 alpha, chloroplastic OS=Arabidopsis thaliana GN=RPS6 PE=2 SV=1	GO:0003735(structural constituent of ribosome);GO:0070181(small ribosomal subunit rRNA binding)	ENOG4111S82(ribosomal protein S6)	K02990	small subunit ribosomal protein S6	-	zju03010(Ribosome)	B9GL27.2 PF01250.15;Ribosomal_S6;	no	no
TRINITY_DN13284_c1_g7	3185	TRINITY_DN13284_c1_g7_i1	COP1-interactive protein 1 [Populus trichocarpa]	-	-	GO:0005515(protein binding);GO:0005634(nucleus);GO:0005773(vacuole);GO:0005774(vacuolar membrane);GO:0005856(cytoskeleton);GO:0005886(plasma membrane);GO:0009507(chloroplast);GO:0042306(regulation of protein import into nucleus);GO:0071215(cellular respon	ENOG4111UGN(keratin, type II cytoskeletal)	NA	NA	NA	NA(NA)	-	no	no
TRINITY_DN13295_c0_g5	2033	TRINITY_DN13295_c0_g5_i1;TRINITY_DN13295_c0_g5_i2	ATP synthase subunit beta, mitochondrial [Manihot esculenta]	ATPB	ATP synthase subunit beta, mitochondrial OS=Hevea brasiliensis GN=ATPB PE=2 SV=1	GO:0005524(ATP binding);GO:0015986(ATP synthesis coupled proton transport)	COG0055(Produces ATP from ADP in the presence of a proton gradient across the membrane. The catalytic sites are hosted primarily by the beta subunits (By similarity))	K02133	F-type H+-transporting ATPase subunit beta	EC:3.6.3.14	hbr00190(Oxidative phosphorylation)	A4RSS5.1 PF00006.23;ATP-synt_ab;	no	no
TRINITY_DN13311_c2_g5	668	TRINITY_DN13311_c2_g5_i1;TRINITY_DN13311_c2_g5_i2	60S ribosomal protein L22-2 [Jatropha curcas]	RPL22B	60S ribosomal protein L22-2 OS=Arabidopsis thaliana GN=RPL22B PE=2 SV=1	GO:0002181(cytoplasmic translation);GO:0003735(structural constituent of ribosome);GO:0022625(cytosolic large ribosomal subunit)	ENOG4111UVJ(Ribosomal protein)	K02891	large subunit ribosomal protein L22e	-	jcu03010(Ribosome)	A0A0B0NDR5.1 PF01776.15;Ribosomal_L22e;	no	no
TRINITY_DN13311_c2_g7	735	TRINITY_DN13311_c2_g7_i1;TRINITY_DN13311_c2_g7_i2	60S ribosomal protein L22-2-like [Hevea brasiliensis]	RPL22B	60S ribosomal protein L22-2 OS=Arabidopsis thaliana GN=RPL22B PE=2 SV=1	GO:0002181(cytoplasmic translation);GO:0003735(structural constituent of ribosome);GO:0022625(cytosolic large ribosomal subunit)	ENOG4111UVJ(Ribosomal protein)	K02891	large subunit ribosomal protein L22e	-	hbr03010(Ribosome)	A0A0B0NDR5.1 PF01776.15;Ribosomal_L22e;	no	no
TRINITY_DN13330_c0_g3	1362	TRINITY_DN13330_c0_g3_i1;TRINITY_DN13330_c0_g3_i2;TRINITY_DN13330_c0_g3_i3;TRINITY_DN13330_c0_g3_i4;TRINITY_DN13330_c0_g3_i5;TRINITY_DN13330_c0_g3_i6	syntaxin-52 isoform X1 [Jatropha curcas]	SYP52	Syntaxin-52 OS=Arabidopsis thaliana GN=SYP52 PE=1 SV=1	GO:0000149(SNARE binding);GO:0005484(SNAP receptor activity);GO:0006886(intracellular protein transport);GO:0006906(vesicle fusion);GO:0012505(endomembrane system);GO:0016021(integral component of membrane);GO:0031201(SNARE complex);GO:0048278(vesicle doc	ENOG410ZZA3(syntaxin)	K08503	syntaxin of plants SYP5	-	jcu04130(SNARE interactions in vesicular transport)	I1KYD6.1 PF05739.17;SNARE;	no	no
TRINITY_DN10613_c0_g2	2064	TRINITY_DN10613_c0_g2_i1	T-complex protein 1 subunit gamma [Citrus clementina]	CCT3	T-complex protein 1 subunit gamma OS=Arabidopsis thaliana GN=CCT3 PE=1 SV=1	GO:0005515(protein binding);GO:0005524(ATP binding);GO:0005737(cytoplasm);GO:0005829(cytosol)	COG0459(Prevents misfolding and promotes the refolding and proper assembly of unfolded polypeptides generated under stress conditions (By similarity))	NA	NA	NA	NA(NA)	V4M009.1 PF00118.22;Cpn60_TCP1;	no	no
TRINITY_DN13332_c0_g6	2469	TRINITY_DN13332_c0_g6_i1	protein SIEVE ELEMENT OCCLUSION B-like [Populus trichocarpa]	SEOB	Protein SIEVE ELEMENT OCCLUSION B OS=Arabidopsis thaliana GN=SEOB PE=1 SV=1	GO:0005634(nucleus);GO:0010088(phloem development);GO:0042803(protein homodimerization activity);GO:0043621(protein self-association)	ENOG4111ADI(Mediator complex subunit 28)	-	-	-	-	B9GIM4.2 PF14576.4;SEO_N;	no	no
TRINITY_DN13333_c0_g3	1195	TRINITY_DN13333_c0_g3_i1	guanine nucleotide-binding protein subunit beta-like protein [Jatropha curcas]	GB1	Guanine nucleotide-binding protein subunit beta-like protein OS=Medicago sativa GN=GB1 PE=2 SV=1	GO:0000166(nucleotide binding);GO:0005078(MAP-kinase scaffold activity);GO:0005080(protein kinase C binding);GO:0005634(nucleus);GO:0005737(cytoplasm);GO:0005829(cytosol);GO:0006417(regulation of translation);GO:0007165(signal transduction);GO:0009845(see	ENOG410XQGZ(guanine nucleotidebinding protein)	NA	NA	NA	NA(NA)	M0RXA8.1 PF00400.30;WD40;	no	no
TRINITY_DN13353_c0_g5	2414	TRINITY_DN13353_c0_g5_i1	uncharacterized protein LOC7478601 [Populus trichocarpa]	BACOVA_02659	Beta-glucosidase BoGH3B OS=Bacteroides ovatus (strain ATCC 8483 / DSM 1896 / JCM 5824 / NCTC 11153) GN=BACOVA_02659 PE=1 SV=1	GO:0008422(beta-glucosidase activity);GO:0009251(glucan catabolic process)	COG1472(hydrolase family 3)	K05349	beta-glucosidase	EC:3.2.1.21	cit00500(Starch and sucrose metabolism);cit00460(Cyanoamino acid metabolism);cit00940(Phenylpropanoid biosynthesis)	A0A067L6R2.1 PF00933.19;Glyco_hydro_3;	no	no
TRINITY_DN10615_c0_g2	1961	TRINITY_DN10615_c0_g2_i1;TRINITY_DN10615_c0_g2_i2;TRINITY_DN10615_c0_g2_i3;TRINITY_DN10615_c0_g2_i4;TRINITY_DN10615_c0_g2_i5;TRINITY_DN10615_c0_g2_i6	CBS domain-containing protein CBSX3, mitochondrial [Citrus sinensis]	CBSX3	CBS domain-containing protein CBSX3, mitochondrial OS=Arabidopsis thaliana GN=CBSX3 PE=1 SV=1	GO:0005739(mitochondrion);GO:0009651(response to salt stress);GO:0045454(cell redox homeostasis);GO:0050897(cobalt ion binding)	COG0517(Catalyzes the conversion of inosine 5'-phosphate (IMP) to xanthosine 5'-phosphate (XMP), the first committed and rate- limiting step in the de novo synthesis of guanine nucleotides, and therefore plays an important role in the regulation of cell g	-	-	-	-	A0A078HR24.1 PF00571.26;CBS;	no	no
TRINITY_DN13361_c1_g1	1217	TRINITY_DN13361_c1_g1_i1;TRINITY_DN13361_c1_g1_i2;TRINITY_DN13361_c1_g1_i3;TRINITY_DN13361_c1_g1_i4;TRINITY_DN13361_c1_g1_i5	universal stress protein PHOS32 [Manihot esculenta]	-	-	GO:0003676(nucleic acid binding);GO:0005634(nucleus);GO:0005737(cytoplasm);GO:0005886(plasma membrane);GO:0006950(response to stress);GO:0006979(response to oxidative stress);GO:0009408(response to heat);GO:0009409(response to cold);GO:0009506(plasmodesma	ENOG410YI8C(universal stress protein)	-	-	-	-	A9PHM7.1 PF00582.24;Usp;	no	no
TRINITY_DN13371_c0_g2	1198	TRINITY_DN13371_c0_g2_i1;TRINITY_DN13371_c0_g2_i2;TRINITY_DN13371_c0_g2_i3	soluble inorganic pyrophosphatase 1 [Populus trichocarpa]	PPA1	Soluble inorganic pyrophosphatase 1 OS=Arabidopsis thaliana GN=PPA1 PE=1 SV=1	GO:0000287(magnesium ion binding);GO:0004427(inorganic diphosphatase activity);GO:0005634(nucleus);GO:0005737(cytoplasm);GO:0005829(cytosol);GO:0006796(phosphate-containing compound metabolic process);GO:0016020(membrane);GO:0019915(lipid storage)	COG0221(Pyrophosphate phospho-hydrolase)	K01507	inorganic pyrophosphatase	EC:3.6.1.1	aly00190(Oxidative phosphorylation)	M4FHA1.1 PF00719.17;Pyrophosphatase;	no	no
TRINITY_DN11318_c0_g8	585	TRINITY_DN11318_c0_g8_i1	hypothetical protein EUGRSUZ_C00830 [Eucalyptus grandis]	RPS3A	40S ribosomal protein S3-1 OS=Arabidopsis thaliana GN=RPS3A PE=1 SV=1	GO:0003684(damaged DNA binding);GO:0003735(structural constituent of ribosome);GO:0005634(nucleus);GO:0006281(DNA repair);GO:0008534(oxidized purine nucleobase lesion DNA N-glycosylase activity);GO:0022627(cytosolic small ribosomal subunit)	COG0092(Binds the lower part of the 30S subunit head. Binds mRNA in the 70S ribosome, positioning it for translation (By similarity))	K02985	small subunit ribosomal protein S3e	-	jcu03010(Ribosome)	A0A061GSA9.1 PF07650.15;KH_2;	no	no
TRINITY_DN13380_c0_g5	1898	TRINITY_DN13380_c0_g5_i1	elongation factor Tu, chloroplastic [Hevea brasiliensis]	TUFB1	Elongation factor Tu, chloroplastic OS=Glycine max GN=TUFB1 PE=3 SV=1	GO:0003746(translation elongation factor activity);GO:0003924(GTPase activity);GO:0005739(mitochondrion);GO:0070125(mitochondrial translational elongation)	COG0050(This protein promotes the GTP-dependent binding of aminoacyl-tRNA to the A-site of ribosomes during protein biosynthesis (By similarity))	NA	NA	NA	NA(NA)	K4C8Q1.1 PF00009.25;GTP_EFTU;	no	no
TRINITY_DN13383_c0_g2	1183	TRINITY_DN13383_c0_g2_i1;TRINITY_DN13383_c0_g2_i2;TRINITY_DN13383_c0_g2_i3;TRINITY_DN13383_c0_g2_i4;TRINITY_DN13383_c0_g2_i5;TRINITY_DN13383_c0_g2_i6;TRINITY_DN13383_c0_g2_i7;TRINITY_DN13383_c0_g2_i8	20S proteasome subunit PAA2 isoform 2 [Theobroma cacao]	PAA1	Proteasome subunit alpha type-6 OS=Nicotiana tabacum GN=PAA1 PE=2 SV=1	GO:0000502(proteasome complex);GO:0004298(threonine-type endopeptidase activity);GO:0005634(nucleus);GO:0005737(cytoplasm);GO:0005839(proteasome core complex);GO:0006511(ubiquitin-dependent protein catabolic process);GO:0008233(peptidase activity);GO:0022	ENOG410XR7X(The proteasome is a multicatalytic proteinase complex which is characterized by its ability to cleave peptides with Arg, Phe, Tyr, Leu, and Glu adjacent to the leaving group at neutral or slightly basic pH. The proteasome has an ATP-dependent	K02730	20S proteasome subunit alpha 1	EC:3.4.25.1	adu03050(Proteasome)	A0A0B0MQP3.1 PF00227.24;Proteasome;	no	no
TRINITY_DN13384_c0_g4	1305	TRINITY_DN13384_c0_g4_i1;TRINITY_DN13384_c0_g4_i2	binding partner of ACD11 1-like [Hevea brasiliensis]	BPA1	Binding partner of ACD11 1 OS=Arabidopsis thaliana GN=BPA1 PE=1 SV=1	GO:0003676(nucleic acid binding);GO:0005634(nucleus);GO:0005829(cytosol);GO:0009735(response to cytokinin)	ENOG4111ICI(actin cytoskeleton protein)	-	-	-	-	D7T7N4.1 PF00076.20;RRM_1;	no	no
TRINITY_DN13398_c0_g1	2959	TRINITY_DN13398_c0_g1_i1;TRINITY_DN13398_c0_g1_i10;TRINITY_DN13398_c0_g1_i11;TRINITY_DN13398_c0_g1_i12;TRINITY_DN13398_c0_g1_i2;TRINITY_DN13398_c0_g1_i3;TRINITY_DN13398_c0_g1_i4;TRINITY_DN13398_c0_g1_i5;TRINITY_DN13398_c0_g1_i6;TRINITY_DN13398_c0_g1_i7;TR	serine/arginine-rich splicing factor SR30 isoform X2 [Jatropha curcas]	SR30	Serine/arginine-rich splicing factor SR30 OS=Arabidopsis thaliana GN=SR30 PE=1 SV=1	GO:0003723(RNA binding);GO:0003729(mRNA binding);GO:0005515(protein binding);GO:0005634(nucleus);GO:0005681(spliceosomal complex);GO:0005737(cytoplasm);GO:0006376(mRNA splice site selection);GO:0016607(nuclear speck);GO:0035061(interchromatin granule);GO:	COG0724(Rna-binding protein)	K12890	splicing factor, arginine/serine-rich 1	-	jcu03040(Spliceosome)	A0A059D3B4.1 PF00076.20;RRM_1;	no	no
TRINITY_DN13421_c0_g1	2773	TRINITY_DN13421_c0_g1_i1;TRINITY_DN13421_c0_g1_i2;TRINITY_DN13421_c0_g1_i3;TRINITY_DN13421_c0_g1_i4;TRINITY_DN13421_c0_g1_i5	stromal 70 kDa heat shock-related protein, chloroplastic [Manihot esculenta]	HSP70-6	Heat shock 70 kDa protein 6, chloroplastic OS=Arabidopsis thaliana GN=HSP70-6 PE=1 SV=1	GO:0005515(protein binding);GO:0005524(ATP binding);GO:0005622(intracellular);GO:0005623(cell);GO:0005634(nucleus);GO:0005739(mitochondrion);GO:0005829(cytosol);GO:0006457(protein folding);GO:0009408(response to heat);GO:0009409(response to cold);GO:00095	COG0443(Heat shock protein)	K03283	heat shock 70kDa protein 1/2/6/8	-	jcu03040(Spliceosome);jcu04141(Protein processing in endoplasmic reticulum);jcu04144(Endocytosis)	A0A067DN94.1 PF00012.18;HSP70;	no	no
TRINITY_DN13424_c0_g5	1813	TRINITY_DN13424_c0_g5_i1	cysteine desulfurase, mitochondrial [Populus trichocarpa]	NIFS1	Cysteine desulfurase, mitochondrial OS=Arabidopsis thaliana GN=NIFS1 PE=1 SV=1	GO:0005515(protein binding);GO:0005524(ATP binding);GO:0005739(mitochondrion);GO:0008270(zinc ion binding);GO:0008483(transaminase activity);GO:0009507(chloroplast);GO:0016226(iron-sulfur cluster assembly);GO:0030170(pyridoxal phosphate binding);GO:003107	COG1104(cysteine desulfurase)	K04487	cysteine desulfurase	EC:2.8.1.7	hbr00730(Thiamine metabolism);hbr04122(Sulfur relay system)	A0A067KAT9.1 PF00266.17;Aminotran_5;	no	no
TRINITY_DN13431_c0_g1	1332	TRINITY_DN13431_c0_g1_i1;TRINITY_DN13431_c0_g1_i2	elongation factor 2-like [Manihot esculenta]	-	Elongation factor 2 OS=Beta vulgaris PE=2 SV=1	GO:0003924(GTPase activity);GO:0005622(intracellular);GO:0006412(translation)	COG0480(Catalyzes the GTP-dependent ribosomal translocation step during translation elongation. During this step, the ribosome changes from the pre-translocational (PRE) to the post- translocational (POST) state as the newly formed A-site-bound peptidyl-t	NA	NA	NA	NA(NA)	M0VPU0.1 PF03764.16;EFG_IV;	no	no
TRINITY_DN13436_c1_g14	1506	TRINITY_DN13436_c1_g14_i1	hypothetical protein CUMW_224030 [Citrus unshiu]	IDH5	Isocitrate dehydrogenase [NAD] catalytic subunit 5, mitochondrial OS=Arabidopsis thaliana GN=IDH5 PE=1 SV=1	GO:0000287(magnesium ion binding);GO:0004449(isocitrate dehydrogenase (NAD+) activity);GO:0005524(ATP binding);GO:0005739(mitochondrion);GO:0006099(tricarboxylic acid cycle);GO:0006102(isocitrate metabolic process);GO:0008270(zinc ion binding);GO:0009507(	COG0473(3-isopropylmalate dehydrogenase activity)	K00030	isocitrate dehydrogenase (NAD+)	EC:1.1.1.41	cit00020(Citrate cycle (TCA cycle))	M5VYP8.1 PF00180.18;Iso_dh;	no	no
TRINITY_DN13441_c1_g1	1046	TRINITY_DN13441_c1_g1_i1	hypothetical protein CK203_052272 [Vitis vinifera]	-	-	-	ENOG41122DF(NA)	-	-	-	-	F6HZZ6.1 PF07468.9;Agglutinin;	no	no
TRINITY_DN13465_c0_g8	3003	TRINITY_DN13465_c0_g8_i1	protein PLASTID MOVEMENT IMPAIRED 1 [Populus trichocarpa]	PMI1	Protein PLASTID MOVEMENT IMPAIRED 1 OS=Arabidopsis thaliana GN=PMI1 PE=1 SV=1	GO:0005622(intracellular);GO:0005623(cell);GO:0005829(cytosol);GO:0005886(plasma membrane);GO:0006970(response to osmotic stress);GO:0009507(chloroplast);GO:0009637(response to blue light);GO:0009738(abscisic acid-activated signaling pathway);GO:0009787(r	ENOG410Y932(NA)	-	-	-	-	B9H5V4.2 PF10358.7;NT-C2;	no	no
TRINITY_DN13475_c1_g3	1148	TRINITY_DN13475_c1_g3_i1	PREDICTED: 40S ribosomal protein S2-4-like [Solanum tuberosum]	RPS2D	40S ribosomal protein S2-4 OS=Arabidopsis thaliana GN=RPS2D PE=2 SV=1	GO:0003735(structural constituent of ribosome);GO:0006412(translation);GO:0022627(cytosolic small ribosomal subunit)	COG0098(Located at the back of the 30S subunit body where it stabilizes the conformation of the head with respect to the body (By similarity))	K02981	small subunit ribosomal protein S2e	-	sot03010(Ribosome)	M0S2A3.1 PF03719.13;Ribosomal_S5_C;	no	no
TRINITY_DN13509_c0_g1	2083	TRINITY_DN13509_c0_g1_i1;TRINITY_DN13509_c0_g1_i2;TRINITY_DN13509_c0_g1_i3;TRINITY_DN13509_c0_g1_i4;TRINITY_DN13509_c0_g1_i5	uncharacterized protein LOC18104284 [Populus trichocarpa]	-	-	GO:0003674(molecular_function);GO:0005634(nucleus);GO:0009507(chloroplast)	COG3450(Enzyme of the cupin superfamily)	NA	NA	NA	NA(NA)	A9PG71.1 PF05899.10;Cupin_3;	down	yes
TRINITY_DN13516_c0_g2	2897	TRINITY_DN13516_c0_g2_i1;TRINITY_DN13516_c0_g2_i2	heat shock protein 90-5, chloroplastic [Jatropha curcas]	HSP90-5	Heat shock protein 90-5, chloroplastic OS=Arabidopsis thaliana GN=HSP90-5 PE=1 SV=1	GO:0005515(protein binding);GO:0005524(ATP binding);GO:0005739(mitochondrion);GO:0005774(vacuolar membrane);GO:0005829(cytosol);GO:0006457(protein folding);GO:0009408(response to heat);GO:0009414(response to water deprivation);GO:0009507(chloroplast);GO:0	COG0326(Molecular chaperone. Has ATPase activity (By similarity))	K09487	heat shock protein 90kDa beta	-	jcu04141(Protein processing in endoplasmic reticulum);jcu04626(Plant-pathogen interaction)	A0A067K5L6.1 PF00183.16;HSP90;	no	no
TRINITY_DN13525_c0_g3	1561	TRINITY_DN13525_c0_g3_i1;TRINITY_DN13525_c0_g3_i2;TRINITY_DN13525_c0_g3_i3;TRINITY_DN13525_c0_g3_i4	succinate--CoA ligase [ADP-forming] subunit alpha-1, mitochondrial [Hevea brasiliensis]	-	Succinate--CoA ligase [ADP-forming] subunit alpha-2, mitochondrial OS=Solanum lycopersicum PE=1 SV=1	GO:0004775(succinate-CoA ligase (ADP-forming) activity);GO:0004776(succinate-CoA ligase (GDP-forming) activity);GO:0005759(mitochondrial matrix);GO:0005829(cytosol);GO:0006099(tricarboxylic acid cycle);GO:0006104(succinyl-CoA metabolic process);GO:0006105	COG0074(Succinyl-CoA ligase ADP-forming subunit alpha)	K01899	succinyl-CoA synthetase alpha subunit	EC:6.2.1.4 6.2.1.5	hbr00020(Citrate cycle (TCA cycle));hbr00640(Propanoate metabolism)	P68209.1 PF00549.17;Ligase_CoA;	no	no
TRINITY_DN13546_c0_g2	1630	TRINITY_DN13546_c0_g2_i1;TRINITY_DN13546_c0_g2_i2;TRINITY_DN13546_c0_g2_i3	protease Do-like 8, chloroplastic isoform X1 [Hevea brasiliensis]	DEGP8	Protease Do-like 8, chloroplastic OS=Arabidopsis thaliana GN=DEGP8 PE=1 SV=1	GO:0004252(serine-type endopeptidase activity);GO:0006508(proteolysis);GO:0008233(peptidase activity);GO:0008236(serine-type peptidase activity);GO:0009507(chloroplast);GO:0009534(chloroplast thylakoid);GO:0009543(chloroplast thylakoid lumen);GO:0009579(t	COG0265(Serine protease)	NA	NA	NA	NA(NA)	A0A061EET1.1 PF13365.4;Trypsin_2;	no	no
TRINITY_DN13558_c1_g10	1344	TRINITY_DN13558_c1_g10_i1	rho-N domain-containing protein 1, chloroplastic-like [Hevea brasiliensis]	RHON1	Rho-N domain-containing protein 1, chloroplastic OS=Arabidopsis thaliana GN=RHON1 PE=1 SV=1	GO:0005515(protein binding);GO:0005634(nucleus);GO:0006353(DNA-templated transcription, termination);GO:0009507(chloroplast);GO:0009737(response to abscisic acid);GO:0010239(chloroplast mRNA processing);GO:0019843(rRNA binding);GO:0043621(protein self-ass	ENOG410YIZQ(Sap-like protein)	-	-	-	-	B9T1B2.1 PF07498.10;Rho_N;	no	no
TRINITY_DN13568_c0_g1	846	TRINITY_DN13568_c0_g1_i1;TRINITY_DN13568_c0_g1_i2;TRINITY_DN13568_c0_g1_i3;TRINITY_DN13568_c0_g1_i4;TRINITY_DN13568_c0_g1_i5;TRINITY_DN13568_c0_g1_i6	miraculin-like protein, partial [Passiflora edulis]	-	-	-	-	-	-	-	-	-	no	no
TRINITY_DN13582_c0_g2	4091	TRINITY_DN13582_c0_g2_i1;TRINITY_DN13582_c0_g2_i2	PREDICTED: uncharacterized protein LOC100262932 [Vitis vinifera]	tsf	Elongation factor Ts OS=Synechococcus sp. (strain ATCC 27264 / PCC 7002 / PR-6) GN=tsf PE=3 SV=1	GO:0003746(translation elongation factor activity);GO:0005759(mitochondrial matrix);GO:0070125(mitochondrial translational elongation)	COG0264(Associates with the EF-Tu.GDP complex and induces the exchange of GDP to GTP. It remains bound to the aminoacyl-tRNA.EF- Tu.GTP complex up to the GTP hydrolysis stage on the ribosome (By similarity));COG2183(domain protein)	NA	NA	NA	NA(NA)	A0A0D2W8P4.1 PF00889.17;EF_TS;	no	no
TRINITY_DN13585_c0_g3	1775	TRINITY_DN13585_c0_g3_i1;TRINITY_DN13585_c0_g3_i2;TRINITY_DN13585_c0_g3_i3;TRINITY_DN13585_c0_g3_i4	PREDICTED: catalase isozyme 1 [Vitis vinifera]	CAT2	Catalase-2 OS=Arabidopsis thaliana GN=CAT2 PE=2 SV=3	GO:0004096(catalase activity);GO:0005737(cytoplasm);GO:0020037(heme binding);GO:0042542(response to hydrogen peroxide);GO:0042744(hydrogen peroxide catabolic process)	COG0753(Catalase)	K03781	catalase	EC:1.11.1.6	vvi00630(Glyoxylate and dicarboxylate metabolism);vvi00380(Tryptophan metabolism);vvi04016(MAPK signaling pathway - plant);vvi04146(Peroxisome)	F6I0K4.1 PF00199.17;Catalase;	no	no
TRINITY_DN13607_c0_g2	1383	TRINITY_DN13607_c0_g2_i1;TRINITY_DN13607_c0_g2_i2;TRINITY_DN13607_c0_g2_i3	probable proteasome inhibitor [Hevea brasiliensis]	At3g53970	Probable proteasome inhibitor OS=Arabidopsis thaliana GN=At3g53970 PE=1 SV=1	GO:0006511(ubiquitin-dependent protein catabolic process)	ENOG4111GK4(positive regulation of cellular protein metabolic process)	K06700	proteasome inhibitor subunit 1 (PI31)	-	hbr03050(Proteasome)	A0A067JX02.1 PF11566.6;PI31_Prot_N;	no	no
TRINITY_DN13622_c0_g1	1570	TRINITY_DN13622_c0_g1_i1;TRINITY_DN13622_c0_g1_i2;TRINITY_DN13622_c0_g1_i3;TRINITY_DN13622_c0_g1_i4;TRINITY_DN13622_c0_g1_i5;TRINITY_DN13622_c0_g1_i6;TRINITY_DN13622_c0_g1_i7;TRINITY_DN13622_c0_g1_i8	26S protease regulatory subunit S10B homolog B [Prunus persica]	RPT4A	26S protease regulatory subunit 10B homolog A OS=Arabidopsis thaliana GN=RPT4A PE=1 SV=1	GO:0008540(proteasome regulatory particle, base subcomplex);GO:0017025(TBP-class protein binding);GO:0030433(ubiquitin-dependent ERAD pathway);GO:0031595(nuclear proteasome complex);GO:0031597(cytosolic proteasome complex);GO:0036402(proteasome-activating	COG1222(26S protease regulatory subunit)	K03064	26S proteasome regulatory subunit T4	-	pper03050(Proteasome)	A0A0D9YNU9.1 PF00004.27;AAA;	no	no
TRINITY_DN13637_c0_g1	1427	TRINITY_DN13637_c0_g1_i1;TRINITY_DN13637_c0_g1_i2;TRINITY_DN13637_c0_g1_i3;TRINITY_DN13637_c0_g1_i4;TRINITY_DN13637_c0_g1_i5;TRINITY_DN13637_c0_g1_i6	Ribosomal protein S6e [Corchorus olitorius]	rps6	40S ribosomal protein S6 OS=Asparagus officinalis GN=rps6 PE=2 SV=1	GO:0006364(rRNA processing);GO:0022627(cytosolic small ribosomal subunit);GO:0042274(ribosomal small subunit biogenesis)	COG2125(40s ribosomal protein s6)	K02991	small subunit ribosomal protein S6e	-	hbr03010(Ribosome)	K4DHA3.1 PF01092.17;Ribosomal_S6e;	no	no
TRINITY_DN13644_c0_g1	1925	TRINITY_DN13644_c0_g1_i1;TRINITY_DN13644_c0_g1_i2;TRINITY_DN13644_c0_g1_i3;TRINITY_DN13644_c0_g1_i4;TRINITY_DN13644_c0_g1_i5;TRINITY_DN13644_c0_g1_i6;TRINITY_DN13644_c0_g1_i7;TRINITY_DN13644_c0_g1_i8;TRINITY_DN13644_c0_g1_i9	PREDICTED: glucose-1-phosphate adenylyltransferase small subunit, chloroplastic [Tarenaya hassleriana]	AGPS1	Glucose-1-phosphate adenylyltransferase small subunit, chloroplastic OS=Brassica napus GN=AGPS1 PE=2 SV=1	GO:0005524(ATP binding);GO:0005978(glycogen biosynthetic process);GO:0008878(glucose-1-phosphate adenylyltransferase activity);GO:0009507(chloroplast);GO:0009570(chloroplast stroma);GO:0019252(starch biosynthetic process);GO:0030931(heterotetrameric ADPG	COG0448(Catalyzes the synthesis of ADP-glucose, a sugar donor used in elongation reactions on alpha-glucans (By similarity))	K00975	glucose-1-phosphate adenylyltransferase	EC:2.7.7.27	thj00500(Starch and sucrose metabolism);thj00520(Amino sugar and nucleotide sugar metabolism)	A0A0D2VJM2.1 PF00483.21;NTP_transferase;	no	no
TRINITY_DN13644_c0_g2	2021	TRINITY_DN13644_c0_g2_i1;TRINITY_DN13644_c0_g2_i10;TRINITY_DN13644_c0_g2_i11;TRINITY_DN13644_c0_g2_i12;TRINITY_DN13644_c0_g2_i13;TRINITY_DN13644_c0_g2_i14;TRINITY_DN13644_c0_g2_i15;TRINITY_DN13644_c0_g2_i16;TRINITY_DN13644_c0_g2_i2;TRINITY_DN13644_c0_g2_i	PREDICTED: clathrin light chain 2-like [Juglans regia]	Os04g0679100	Clathrin light chain 1 OS=Oryza sativa subsp. japonica GN=Os04g0679100 PE=2 SV=1	GO:0005198(structural molecule activity);GO:0030125(clathrin vesicle coat);GO:0032050(clathrin heavy chain binding);GO:0072583(clathrin-dependent endocytosis)	ENOG410YB93(clathrin light chain)	K04645	clathrin light chain B	-	brp04144(Endocytosis)	F6HWS4.1 PF01086.15;Clathrin_lg_ch;	no	no
TRINITY_DN13652_c0_g3	996	TRINITY_DN13652_c0_g3_i1;TRINITY_DN13652_c0_g3_i2	50S ribosomal protein L12-3, chloroplastic-like [Manihot esculenta]	RPL12	50S ribosomal protein L12, chloroplastic OS=Spinacia oleracea GN=RPL12 PE=1 SV=2	GO:0003735(structural constituent of ribosome);GO:0006412(translation)	COG0222(Seems to be the binding site for several of the factors involved in protein synthesis and appears to be essential for accurate translation (By similarity))	K02935	large subunit ribosomal protein L7/L12	-	jcu03010(Ribosome)	A0A061ECN0.1 PF00542.17;Ribosomal_L12;	no	no
TRINITY_DN13652_c0_g6	849	TRINITY_DN13652_c0_g6_i1	50S ribosomal protein L12-1, chloroplastic [Jatropha curcas]	RPL12	50S ribosomal protein L12, chloroplastic OS=Spinacia oleracea GN=RPL12 PE=1 SV=2	GO:0003735(structural constituent of ribosome);GO:0006412(translation)	COG0222(Seems to be the binding site for several of the factors involved in protein synthesis and appears to be essential for accurate translation (By similarity))	K02935	large subunit ribosomal protein L7/L12	-	jcu03010(Ribosome)	A0A061ECN0.1 PF00542.17;Ribosomal_L12;	no	no
TRINITY_DN13653_c1_g1	1213	TRINITY_DN13653_c1_g1_i1	alpha-xylosidase 1 [Ricinus communis]	XYL1	Alpha-xylosidase 1 OS=Arabidopsis thaliana GN=XYL1 PE=1 SV=1	GO:0004553(hydrolase activity, hydrolyzing O-glycosyl compounds);GO:0005576(extracellular region);GO:0005618(cell wall);GO:0005829(cytosol);GO:0009044(xylan 1,4-beta-xylosidase activity);GO:0009505(plant-type cell wall);GO:0009506(plasmodesma);GO:0009507(	COG1501(hydrolase, family 31)	NA	NA	NA	NA(NA)	B9T066.1 PF16863.3;NtCtMGAM_N;	no	no
TRINITY_DN13653_c1_g3	3027	TRINITY_DN13653_c1_g3_i1;TRINITY_DN13653_c1_g3_i2	alpha-xylosidase 1 [Ricinus communis]	XYL1	Alpha-xylosidase 1 OS=Arabidopsis thaliana GN=XYL1 PE=1 SV=1	GO:0004553(hydrolase activity, hydrolyzing O-glycosyl compounds);GO:0005576(extracellular region);GO:0005618(cell wall);GO:0005829(cytosol);GO:0009044(xylan 1,4-beta-xylosidase activity);GO:0009505(plant-type cell wall);GO:0009506(plasmodesma);GO:0009507(	COG1501(hydrolase, family 31)	NA	NA	NA	NA(NA)	A0A067KAW1.1 PF01055.24;Glyco_hydro_31;	no	no
TRINITY_DN13657_c0_g2	1550	TRINITY_DN13657_c0_g2_i1;TRINITY_DN13657_c0_g2_i2;TRINITY_DN13657_c0_g2_i3	PREDICTED: triosephosphate isomerase, chloroplastic [Theobroma cacao]	TIM	Triosephosphate isomerase, chloroplastic OS=Arabidopsis thaliana GN=TIM PE=1 SV=1	GO:0004807(triose-phosphate isomerase activity);GO:0005829(cytosol);GO:0006094(gluconeogenesis);GO:0006096(glycolytic process);GO:0019563(glycerol catabolic process);GO:0046166(glyceraldehyde-3-phosphate biosynthetic process)	COG0149(triosephosphate isomerase)	K01803	triosephosphate isomerase (TIM)	EC:5.3.1.1	tcc00010(Glycolysis / Gluconeogenesis);tcc00051(Fructose and mannose metabolism);tcc00562(Inositol phosphate metabolism);tcc00710(Carbon fixation in photosynthetic organisms)	A0A061DYJ8.1 PF00121.16;TIM;	no	no
TRINITY_DN13658_c0_g1	1834	TRINITY_DN13658_c0_g1_i1;TRINITY_DN13658_c0_g1_i2;TRINITY_DN13658_c0_g1_i3	hypothetical protein PHAVU_006G080300g [Phaseolus vulgaris]	-	26S protease regulatory subunit 6B homolog OS=Helianthus annuus PE=1 SV=1	GO:0008540(proteasome regulatory particle, base subcomplex);GO:0017025(TBP-class protein binding);GO:0030433(ubiquitin-dependent ERAD pathway);GO:0031595(nuclear proteasome complex);GO:0031597(cytosolic proteasome complex);GO:0036402(proteasome-activating	COG1222(26S protease regulatory subunit)	K03063	26S proteasome regulatory subunit T3	-	pvu03050(Proteasome)	A0A096QE22.1 PF00004.27;AAA;	no	no
TRINITY_DN13658_c0_g5	1327	TRINITY_DN13658_c0_g5_i1	uncharacterized protein LOC110634557 [Hevea brasiliensis]	grpE	Protein GrpE OS=Prochlorococcus marinus (strain MIT 9301) GN=grpE PE=3 SV=1	GO:0000774(adenyl-nucleotide exchange factor activity);GO:0005507(copper ion binding);GO:0005759(mitochondrial matrix);GO:0006457(protein folding);GO:0009507(chloroplast);GO:0009570(chloroplast stroma);GO:0009579(thylakoid);GO:0009793(embryo development e	COG0576(Participates actively in the response to hyperosmotic and heat shock by preventing the aggregation of stress-denatured proteins, in association with DnaK and GrpE. It is the nucleotide exchange factor for DnaK and may function as a thermosensor. U	NA	NA	NA	NA(NA)	A0A067K9H6.1 PF01025.17;GrpE;	no	no
TRINITY_DN13666_c0_g3	2581	TRINITY_DN13666_c0_g3_i1;TRINITY_DN13666_c0_g3_i2;TRINITY_DN13666_c0_g3_i3	glucomannan 4-beta-mannosyltransferase 9 [Jatropha curcas]	CSLA9	Glucomannan 4-beta-mannosyltransferase 9 OS=Arabidopsis thaliana GN=CSLA9 PE=2 SV=1	GO:0000139(Golgi membrane);GO:0005794(Golgi apparatus);GO:0009294(DNA mediated transformation);GO:0009617(response to bacterium);GO:0016021(integral component of membrane);GO:0016757(transferase activity, transferring glycosyl groups);GO:0047259(glucomann	COG1215(Glycosyl transferase, family 2)	NA	NA	NA	NA(NA)	A0A0D2NSA3.1 PF13641.4;Glyco_tranf_2_3;	no	no
TRINITY_DN13673_c0_g3	1762	TRINITY_DN13673_c0_g3_i1;TRINITY_DN13673_c0_g3_i2	26S proteasome regulatory subunit 6A homolog [Olea europaea var. sylvestris]	TBP1	26S protease regulatory subunit 6A homolog OS=Solanum lycopersicum GN=TBP1 PE=2 SV=1	GO:0008540(proteasome regulatory particle, base subcomplex);GO:0017025(TBP-class protein binding);GO:0030433(ubiquitin-dependent ERAD pathway);GO:0031595(nuclear proteasome complex);GO:0031597(cytosolic proteasome complex);GO:0036402(proteasome-activating	COG1222(26S protease regulatory subunit)	K03065	26S proteasome regulatory subunit T5	-	mtr03050(Proteasome)	A0A0E0PU53.1 PF00004.27;AAA;	no	no
TRINITY_DN13683_c1_g2	2140	TRINITY_DN13683_c1_g2_i1;TRINITY_DN13683_c1_g2_i2;TRINITY_DN13683_c1_g2_i3;TRINITY_DN13683_c1_g2_i4;TRINITY_DN13683_c1_g2_i5;TRINITY_DN13683_c1_g2_i6;TRINITY_DN13683_c1_g2_i7;TRINITY_DN13683_c1_g2_i8;TRINITY_DN13683_c1_g2_i9	calnexin homolog [Populus trichocarpa]	-	Calnexin homolog OS=Glycine max PE=2 SV=1	GO:0005509(calcium ion binding);GO:0005739(mitochondrion);GO:0005773(vacuole);GO:0005774(vacuolar membrane);GO:0005783(endoplasmic reticulum);GO:0005789(endoplasmic reticulum membrane);GO:0005794(Golgi apparatus);GO:0005886(plasma membrane);GO:0006457(pro	ENOG410XP7T(Calnexin)	K08054	calnexin	-	hbr04141(Protein processing in endoplasmic reticulum);hbr04145(Phagosome)	A0A0R0JHW1.1 PF00262.16;Calreticulin;	no	no
TRINITY_DN13686_c0_g3	1193	TRINITY_DN13686_c0_g3_i1;TRINITY_DN13686_c0_g3_i2;TRINITY_DN13686_c0_g3_i3	serine/arginine-rich splicing factor RS41-like isoform X3 [Hevea brasiliensis]	RS41	Serine/arginine-rich splicing factor RS41 OS=Arabidopsis thaliana GN=RS41 PE=1 SV=2	GO:0000179(rRNA (adenine-N6,N6-)-dimethyltransferase activity);GO:0005737(cytoplasm)	COG0724(Rna-binding protein)	K12893	splicing factor, arginine/serine-rich 4/5/6	-	hbr03040(Spliceosome)	A0A067JEL7.1 PF00076.20;RRM_1;	no	no
TRINITY_DN13687_c0_g3	1239	TRINITY_DN13687_c0_g3_i1;TRINITY_DN13687_c0_g3_i2	PREDICTED: probable prefoldin subunit 2 isoform X1 [Populus euphratica]	At3g22480	Probable prefoldin subunit 2 OS=Arabidopsis thaliana GN=At3g22480 PE=2 SV=1	GO:0005737(cytoplasm);GO:0006457(protein folding);GO:0016272(prefoldin complex);GO:0044183(protein binding involved in protein folding);GO:0051082(unfolded protein binding)	ENOG4111S6I(prefoldin subunit 2)	NA	NA	NA	NA(NA)	B9HJZ0.1 PF01920.18;Prefoldin_2;	no	no
TRINITY_DN13688_c0_g7	1308	TRINITY_DN13688_c0_g7_i1	hypothetical protein MANES_16G130700 [Manihot esculenta]	GPX1	Phospholipid hydroperoxide glutathione peroxidase 1, chloroplastic OS=Arabidopsis thaliana GN=GPX1 PE=2 SV=2	GO:0004602(glutathione peroxidase activity);GO:0006979(response to oxidative stress);GO:0009507(chloroplast);GO:0009535(chloroplast thylakoid membrane);GO:0009570(chloroplast stroma);GO:0009941(chloroplast envelope);GO:0047066(phospholipid-hydroperoxide g	COG0386(glutathione peroxidase)	K00432	glutathione peroxidase	EC:1.11.1.9	pavi00590(Arachidonic acid metabolism);pavi00480(Glutathione metabolism)	A0A0A0L112.1 PF00255.17;GSHPx;	up	yes
TRINITY_DN13693_c0_g1	858	TRINITY_DN13693_c0_g1_i1;TRINITY_DN13693_c0_g1_i2	-	-	-	-	-	-	-	-	-	-	no	no
TRINITY_DN13699_c0_g1	3311	TRINITY_DN13699_c0_g1_i1;TRINITY_DN13699_c0_g1_i2	uncharacterized protein LOC18096202 [Populus trichocarpa]	CYCA1-1	Cyclin-A1-1 OS=Arabidopsis thaliana GN=CYCA1-1 PE=1 SV=1	GO:0003674(molecular_function);GO:0005576(extracellular region);GO:0005773(vacuole);GO:0005774(vacuolar membrane);GO:0008150(biological_process);GO:0009505(plant-type cell wall)	COG0823(Involved in the TonB-independent uptake of proteins (By similarity))	NA	NA	NA	NA(NA)	V4MS60.1 PF00930.19;DPPIV_N;	no	no
TRINITY_DN13717_c1_g1	2146	TRINITY_DN13717_c1_g1_i1;TRINITY_DN13717_c1_g1_i10;TRINITY_DN13717_c1_g1_i11;TRINITY_DN13717_c1_g1_i12;TRINITY_DN13717_c1_g1_i13;TRINITY_DN13717_c1_g1_i2;TRINITY_DN13717_c1_g1_i3;TRINITY_DN13717_c1_g1_i4;TRINITY_DN13717_c1_g1_i5;TRINITY_DN13717_c1_g1_i6;T	PREDICTED: survival of motor neuron-related-splicing factor 30 [Theobroma cacao]	-	-	GO:0003723(RNA binding);GO:0005634(nucleus);GO:0005737(cytoplasm);GO:0006397(mRNA processing)	ENOG4110IGD(Survival motor neuron domain containing 1)	K12839	survival of motor neuron-related-splicing factor 30	-	tcc03040(Spliceosome)	A0A067DGF4.1 PF06003.10;SMN;	no	no
TRINITY_DN13738_c0_g1	756	TRINITY_DN13738_c0_g1_i1	coat protein [Carica papaya]	-	Genome polyprotein OS=Bean common mosaic necrosis virus (strain NL-3) PE=2 SV=1	-	-	-	-	-	-	P18247.2 PF00767.16;Poty_coat;	no	no
TRINITY_DN13747_c0_g7	475	TRINITY_DN13747_c0_g7_i1	elongation factor 1-alpha [Prunus persica]	REFA1	Elongation factor 1-alpha OS=Oryza sativa subsp. japonica GN=REFA1 PE=2 SV=2	GO:0003746(translation elongation factor activity);GO:0003924(GTPase activity);GO:0005622(intracellular)	COG5256(This protein promotes the GTP-dependent binding of aminoacyl-tRNA to the A-site of ribosomes during protein biosynthesis (By similarity))	K03231	elongation factor 1-alpha	-	pper03013(RNA transport)	A0A067CC13.1 PF00009.25;GTP_EFTU;	up	yes
TRINITY_DN13757_c0_g1	1231	TRINITY_DN13757_c0_g1_i1;TRINITY_DN13757_c0_g1_i2;TRINITY_DN13757_c0_g1_i3;TRINITY_DN13757_c0_g1_i4;TRINITY_DN13757_c0_g1_i5;TRINITY_DN13757_c0_g1_i6;TRINITY_DN13757_c0_g1_i7;TRINITY_DN13757_c0_g1_i8;TRINITY_DN13757_c0_g1_i9	LOW QUALITY PROTEIN: aminoacylase-1 [Morus notabilis]	acy1	Aminoacylase-1 OS=Dictyostelium discoideum GN=acy1 PE=2 SV=1	GO:0004046(aminoacylase activity);GO:0005737(cytoplasm);GO:0005773(vacuole);GO:0005783(endoplasmic reticulum);GO:0005794(Golgi apparatus);GO:0010043(response to zinc ion)	COG0624(succinyl-diaminopimelate desuccinylase activity)	K14677	aminoacylase	EC:3.5.1.14	hbr00220(Arginine biosynthesis)	F6I0Q2.1 PF01546.26;Peptidase_M20;	no	no
TRINITY_DN13769_c0_g1	2263	TRINITY_DN13769_c0_g1_i1;TRINITY_DN13769_c0_g1_i2;TRINITY_DN13769_c0_g1_i3;TRINITY_DN13769_c0_g1_i4;TRINITY_DN13769_c0_g1_i5;TRINITY_DN13769_c0_g1_i6	PREDICTED: sorbitol dehydrogenase [Populus euphratica]	SDH	Sorbitol dehydrogenase OS=Arabidopsis thaliana GN=SDH PE=1 SV=1	GO:0005737(cytoplasm);GO:0005829(cytosol);GO:0005886(plasma membrane);GO:0008270(zinc ion binding);GO:0009506(plasmodesma);GO:0031966(mitochondrial membrane);GO:0055114(oxidation-reduction process)	COG1063(Dehydrogenase)	K00008	L-iditol 2-dehydrogenase	EC:1.1.1.14	hbr00040(Pentose and glucuronate interconversions);hbr00051(Fructose and mannose metabolism)	B9I4E5.1 PF08240.10;ADH_N;	no	no
TRINITY_DN13775_c1_g7	938	TRINITY_DN13775_c1_g7_i1	photosystem I reaction center subunit II, chloroplastic-like [Hevea brasiliensis]	psaD	Photosystem I reaction center subunit II, chloroplastic OS=Nicotiana sylvestris GN=psaD PE=2 SV=1	GO:0005515(protein binding)	ENOG4111HAV(photosystem i)	K02692	photosystem I subunit II	-	hbr00195(Photosynthesis)	M0SPM5.1 PF02531.14;PsaD;	no	no
TRINITY_DN13802_c0_g2	1840	TRINITY_DN13802_c0_g2_i1;TRINITY_DN13802_c0_g2_i10;TRINITY_DN13802_c0_g2_i11;TRINITY_DN13802_c0_g2_i12;TRINITY_DN13802_c0_g2_i13;TRINITY_DN13802_c0_g2_i2;TRINITY_DN13802_c0_g2_i3;TRINITY_DN13802_c0_g2_i4;TRINITY_DN13802_c0_g2_i5;TRINITY_DN13802_c0_g2_i6;T	UMP-CMP kinase 3-like isoform X1 [Hevea brasiliensis]	UMK3	UMP-CMP kinase 3 OS=Arabidopsis thaliana GN=UMK3 PE=1 SV=1	GO:0004127(cytidylate kinase activity);GO:0005524(ATP binding);GO:0005634(nucleus);GO:0005737(cytoplasm);GO:0005829(cytosol);GO:0006207('de novo' pyrimidine nucleobase biosynthetic process);GO:0006221(pyrimidine nucleotide biosynthetic process);GO:0009041	COG0563(Catalyzes the reversible transfer of the terminal phosphate group between ATP and AMP. Plays an important role in cellular energy homeostasis and in adenine nucleotide metabolism (By similarity))	K13800	UMP-CMP kinase	EC:2.7.4.14	hbr00240(Pyrimidine metabolism)	A0A0D2V7W2.1 PF00406.20;ADK;	no	no
TRINITY_DN10666_c1_g2	914	TRINITY_DN10666_c1_g2_i1;TRINITY_DN10666_c1_g2_i2;TRINITY_DN10666_c1_g2_i3;TRINITY_DN10666_c1_g2_i4;TRINITY_DN10666_c1_g2_i5	hypothetical protein B456_010G132100 [Gossypium raimondii]	RPS18A	40S ribosomal protein S18 OS=Arabidopsis thaliana GN=RPS18A PE=1 SV=1	GO:0005829(cytosol);GO:0006412(translation);GO:0015935(small ribosomal subunit);GO:0042254(ribosome biogenesis)	COG0099(Located at the top of the head of the 30S subunit, it contacts several helices of the 16S rRNA. In the 70S ribosome it contacts the 23S rRNA (bridge B1a) and protein L5 of the 50S subunit (bridge B1b), connecting the 2 subunits)	K02964	small subunit ribosomal protein S18e	-	adu03010(Ribosome)	R0ILI2.1 PF00416.20;Ribosomal_S13;	no	no
TRINITY_DN13820_c0_g1	1848	TRINITY_DN13820_c0_g1_i1;TRINITY_DN13820_c0_g1_i10;TRINITY_DN13820_c0_g1_i11;TRINITY_DN13820_c0_g1_i12;TRINITY_DN13820_c0_g1_i13;TRINITY_DN13820_c0_g1_i14;TRINITY_DN13820_c0_g1_i15;TRINITY_DN13820_c0_g1_i16;TRINITY_DN13820_c0_g1_i2;TRINITY_DN13820_c0_g1_i	hypothetical protein CUMW_093530 [Citrus unshiu]	APX3	L-ascorbate peroxidase 3, peroxisomal OS=Arabidopsis thaliana GN=APX3 PE=1 SV=1	GO:0000302(response to reactive oxygen species);GO:0004130(cytochrome-c peroxidase activity);GO:0005515(protein binding);GO:0005739(mitochondrion);GO:0005773(vacuole);GO:0005774(vacuolar membrane);GO:0005777(peroxisome);GO:0005778(peroxisomal membrane);GO	COG0376(Bifunctional enzyme with both catalase and broad- spectrum peroxidase activity (By similarity))	K00434	L-ascorbate peroxidase	EC:1.11.1.11	cit00053(Ascorbate and aldarate metabolism);cit00480(Glutathione metabolism)	V4U9A5.1 PF00141.21;peroxidase;	up	yes
TRINITY_DN13827_c0_g2	925	TRINITY_DN13827_c0_g2_i1;TRINITY_DN13827_c0_g2_i2	30S ribosomal protein S9, chloroplastic [Jatropha curcas]	RPS9	30S ribosomal protein S9, chloroplastic OS=Arabidopsis thaliana GN=RPS9 PE=2 SV=1	GO:0000312(plastid small ribosomal subunit);GO:0000462(maturation of SSU-rRNA from tricistronic rRNA transcript (SSU-rRNA, 5.8S rRNA, LSU-rRNA));GO:0003735(structural constituent of ribosome);GO:0006412(translation);GO:0022627(cytosolic small ribosomal su	COG0103(30S ribosomal protein S9)	K02996	small subunit ribosomal protein S9	-	jcu03010(Ribosome)	A0A078CAC2.1 PF00380.17;Ribosomal_S9;	no	no
TRINITY_DN13827_c0_g3	2111	TRINITY_DN13827_c0_g3_i1;TRINITY_DN13827_c0_g3_i2;TRINITY_DN13827_c0_g3_i3;TRINITY_DN13827_c0_g3_i4	LOW QUALITY PROTEIN: pinin, partial [Populus trichocarpa]	-	-	-	ENOG4110W63(Pinin, desmosome associated protein)	K13114	pinin	-	jcu03013(RNA transport);jcu03015(mRNA surveillance pathway)	B9H025.2 PF04696.11;Pinin_SDK_memA;	no	no
TRINITY_DN13832_c0_g2	1174	TRINITY_DN13832_c0_g2_i1;TRINITY_DN13832_c0_g2_i2;TRINITY_DN13832_c0_g2_i3;TRINITY_DN13832_c0_g2_i4	peptidyl-prolyl cis-trans isomerase FKBP18, chloroplastic [Hevea brasiliensis]	FKBP18	Peptidyl-prolyl cis-trans isomerase FKBP18, chloroplastic OS=Arabidopsis thaliana GN=FKBP18 PE=1 SV=2	GO:0003755(peptidyl-prolyl cis-trans isomerase activity);GO:0005528(FK506 binding);GO:0005789(endoplasmic reticulum membrane);GO:0061077(chaperone-mediated protein folding)	COG0545(Peptidyl-prolyl cis-trans isomerase)	NA	NA	NA	NA(NA)	A0A0A0L0S6.1 PF00254.26;FKBP_C;	no	no
TRINITY_DN13837_c2_g1	1890	TRINITY_DN13837_c2_g1_i1;TRINITY_DN13837_c2_g1_i2;TRINITY_DN13837_c2_g1_i3;TRINITY_DN13837_c2_g1_i4;TRINITY_DN13837_c2_g1_i5;TRINITY_DN13837_c2_g1_i6;TRINITY_DN13837_c2_g1_i7	PREDICTED: enolase 2 [Populus euphratica]	-	Enolase OS=Ricinus communis PE=2 SV=1	GO:0000015(phosphopyruvate hydratase complex);GO:0000287(magnesium ion binding);GO:0003677(DNA binding);GO:0004634(phosphopyruvate hydratase activity);GO:0005507(copper ion binding);GO:0005634(nucleus);GO:0005737(cytoplasm);GO:0005739(mitochondrion);GO:00	COG0148(Catalyzes the reversible conversion of 2- phosphoglycerate into phosphoenolpyruvate. It is essential for the degradation of carbohydrates via glycolysis (By similarity))	K01689	enolase	EC:4.2.1.11	rcu00010(Glycolysis / Gluconeogenesis);rcu03018(RNA degradation)	A0A0D2S420.1 PF00113.20;Enolase_C;	no	no
TRINITY_DN10668_c0_g2	1076	TRINITY_DN10668_c0_g2_i1	uncharacterized protein LOC110623402 isoform X2 [Manihot esculenta]	At3g10130	Heme-binding-like protein At3g10130, chloroplastic OS=Arabidopsis thaliana GN=At3g10130 PE=2 SV=1	GO:0005737(cytoplasm);GO:0005773(vacuole);GO:0005794(Golgi apparatus);GO:0005829(cytosol);GO:0005886(plasma membrane);GO:0010017(red or far-red light signaling pathway);GO:0020037(heme binding)	ENOG4111V4G(SOUL heme-binding protein)	-	-	-	-	A0A061ERN1.1 PF04832.10;SOUL;	no	no
TRINITY_DN13855_c0_g1	1126	TRINITY_DN13855_c0_g1_i1;TRINITY_DN13855_c0_g1_i2;TRINITY_DN13855_c0_g1_i3;TRINITY_DN13855_c0_g1_i4;TRINITY_DN13855_c0_g1_i5	acyl-CoA-binding domain-containing protein 4-like [Hevea brasiliensis]	ACBP4	Acyl-CoA-binding domain-containing protein 4 OS=Arabidopsis thaliana GN=ACBP4 PE=1 SV=1	GO:0000062(fatty-acyl-CoA binding);GO:0001666(response to hypoxia);GO:0005737(cytoplasm);GO:0005829(cytosol);GO:0006869(lipid transport);GO:0008289(lipid binding);GO:0009416(response to light stimulus)	ENOG410Y5WM(Kelch domain containing)	-	-	-	-	A0A0Q3RQD0.1 PF07888.9;CALCOCO1;	no	no
TRINITY_DN13856_c0_g3	2333	TRINITY_DN13856_c0_g3_i1;TRINITY_DN13856_c0_g3_i2;TRINITY_DN13856_c0_g3_i3;TRINITY_DN13856_c0_g3_i4	PREDICTED: lysine--tRNA ligase, cytoplasmic-like [Gossypium hirsutum]	At3g11710	Lysine--tRNA ligase, cytoplasmic OS=Arabidopsis thaliana GN=At3g11710 PE=1 SV=1	GO:0003677(DNA binding);GO:0004824(lysine-tRNA ligase activity);GO:0005524(ATP binding);GO:0005737(cytoplasm);GO:0005829(cytosol);GO:0006430(lysyl-tRNA aminoacylation);GO:0009506(plasmodesma);GO:0046872(metal ion binding)	COG0514(atp-dependent dna helicase);COG1190(lysyl-trna synthetase)	K04567	lysyl-tRNA synthetase, class II	EC:6.1.1.6	ghi00970(Aminoacyl-tRNA biosynthesis)	B9SY11.1 PF00152.18;tRNA-synt_2;	no	no
TRINITY_DN13860_c0_g1	2272	TRINITY_DN13860_c0_g1_i1;TRINITY_DN13860_c0_g1_i2;TRINITY_DN13860_c0_g1_i3;TRINITY_DN13860_c0_g1_i4;TRINITY_DN13860_c0_g1_i5;TRINITY_DN13860_c0_g1_i6;TRINITY_DN13860_c0_g1_i7;TRINITY_DN13860_c0_g1_i8	hsp70-Hsp90 organizing protein 3 [Jatropha curcas]	HOP2	Hsp70-Hsp90 organizing protein 2 OS=Arabidopsis thaliana GN=HOP2 PE=1 SV=1	GO:0005634(nucleus);GO:0005737(cytoplasm);GO:0005829(cytosol);GO:0005886(plasma membrane);GO:0046686(response to cadmium ion)	ENOG410XTCJ(tetratricopeptide repeat domain)	NA	NA	NA	NA(NA)	C0P732.1 PF13424.4;TPR_12;	no	no
TRINITY_DN13868_c0_g4	1237	TRINITY_DN13868_c0_g4_i1;TRINITY_DN13868_c0_g4_i2;TRINITY_DN13868_c0_g4_i3;TRINITY_DN13868_c0_g4_i4	uncharacterized protein LOC105852523 [Cicer arietinum]	-	-	GO:0005737(cytoplasm);GO:0008150(biological_process);GO:0016757(transferase activity, transferring glycosyl groups)	ENOG410YJAE(NA)	-	-	-	-	-	no	no
TRINITY_DN13887_c0_g4	1262	TRINITY_DN13887_c0_g4_i1;TRINITY_DN13887_c0_g4_i2;TRINITY_DN13887_c0_g4_i3;TRINITY_DN13887_c0_g4_i4;TRINITY_DN13887_c0_g4_i5	BnaC08g42970D [Brassica napus]	CSD1	Superoxide dismutase [Cu-Zn] 1 OS=Arabidopsis thaliana GN=CSD1 PE=1 SV=2	GO:0004784(superoxide dismutase activity);GO:0005507(copper ion binding);GO:0005737(cytoplasm);GO:0008270(zinc ion binding);GO:0019430(removal of superoxide radicals)	COG2032(Destroys radicals which are normally produced within the cells and which are toxic to biological systems (By similarity))	K04565	superoxide dismutase, Cu-Zn family	EC:1.15.1.1	bna04146(Peroxisome)	B9REW9.1 PF00080.18;Sod_Cu;	no	no
TRINITY_DN13891_c0_g1	2713	TRINITY_DN13891_c0_g1_i1;TRINITY_DN13891_c0_g1_i10;TRINITY_DN13891_c0_g1_i11;TRINITY_DN13891_c0_g1_i12;TRINITY_DN13891_c0_g1_i13;TRINITY_DN13891_c0_g1_i14;TRINITY_DN13891_c0_g1_i15;TRINITY_DN13891_c0_g1_i16;TRINITY_DN13891_c0_g1_i17;TRINITY_DN13891_c0_g1_	flowering locus K homology domain-like isoform X1 [Hevea brasiliensis]	FLK	Flowering locus K homology domain OS=Arabidopsis thaliana GN=FLK PE=1 SV=1	GO:0003676(nucleic acid binding);GO:0003723(RNA binding);GO:0005515(protein binding);GO:0005634(nucleus);GO:0005737(cytoplasm);GO:0006351(transcription, DNA-templated);GO:0006355(regulation of transcription, DNA-templated);GO:0009911(positive regulation o	ENOG410XNN8(mRNA transport)	NA	NA	NA	NA(NA)	B9S7H6.1 PF00013.27;KH_1;	no	no
TRINITY_DN13912_c0_g3	898	TRINITY_DN13912_c0_g3_i1;TRINITY_DN13912_c0_g3_i2;TRINITY_DN13912_c0_g3_i3	PREDICTED: ferredoxin--NADP reductase, leaf isozyme, chloroplastic [Gossypium hirsutum]	PETH	Ferredoxin--NADP reductase, leaf-type isozyme, chloroplastic OS=Nicotiana tabacum GN=PETH PE=2 SV=1	GO:0005515(protein binding)	COG0369(Component of the sulfite reductase complex that catalyzes the 6-electron reduction of sulfite to sulfide. This is one of several activities required for the biosynthesis of L- cysteine from sulfate. The flavoprotein component catalyzes the electro	K02641	ferredoxin--NADP+ reductase	EC:1.18.1.2	ghi00195(Photosynthesis)	A0A0D2PBZ3.1 PF00970.22;FAD_binding_6;	no	no
TRINITY_DN13932_c0_g1	2548	TRINITY_DN13932_c0_g1_i1;TRINITY_DN13932_c0_g1_i2;TRINITY_DN13932_c0_g1_i3;TRINITY_DN13932_c0_g1_i4;TRINITY_DN13932_c0_g1_i5;TRINITY_DN13932_c0_g1_i6	plant UBX domain-containing protein 8 isoform X1 [Populus trichocarpa]	PUX8	Plant UBX domain-containing protein 8 OS=Arabidopsis thaliana GN=PUX8 PE=1 SV=1	GO:0005634(nucleus);GO:0005737(cytoplasm);GO:0005829(cytosol);GO:0016192(vesicle-mediated transport)	ENOG4112AXB(UBX domain-containing protein)	NA	NA	NA	NA(NA)	A0A059C1L3.1 PF00789.18;UBX;	no	no
TRINITY_DN13956_c0_g5	728	TRINITY_DN13956_c0_g5_i1	PREDICTED: cell wall / vacuolar inhibitor of fructosidase 1-like isoform X1 [Populus euphratica]	-	-	GO:0004857(enzyme inhibitor activity)	ENOG41113RP(cell wall vacuolar inhibitor of fructosidase)	-	-	-	-	B9HSW8.1 PF04043.13;PMEI;	no	no
TRINITY_DN13971_c0_g2	632	TRINITY_DN13971_c0_g2_i1	-	-	P3N-PIPO polyprotein OS=Soybean mosaic virus (strain N) PE=3 SV=2	GO:0005515(protein binding)	-	-	-	-	-	P0CJ93.2 PF00851.16;Peptidase_C6;	no	no
TRINITY_DN13976_c0_g1	2745	TRINITY_DN13976_c0_g1_i1;TRINITY_DN13976_c0_g1_i2;TRINITY_DN13976_c0_g1_i3;TRINITY_DN13976_c0_g1_i4;TRINITY_DN13976_c0_g1_i5	Protein CASP like [Actinidia chinensis var. chinensis]	CASP	Protein CASP OS=Arabidopsis thaliana GN=CASP PE=1 SV=2	GO:0000139(Golgi membrane);GO:0005768(endosome);GO:0005794(Golgi apparatus);GO:0005802(trans-Golgi network);GO:0006891(intra-Golgi vesicle-mediated transport);GO:0016021(integral component of membrane);GO:0030173(integral component of Golgi membrane);GO:0	ENOG410XPRP(Cut-like homeobox)	NA	NA	NA	NA(NA)	A0A067JBJ3.1 PF08172.10;CASP_C;	no	no
TRINITY_DN13981_c0_g1	2294	TRINITY_DN13981_c0_g1_i1	mitochondrial-processing peptidase subunit alpha-like [Hevea brasiliensis]	MPP	Mitochondrial-processing peptidase subunit alpha OS=Solanum tuberosum GN=MPP PE=1 SV=1	GO:0004222(metalloendopeptidase activity);GO:0005743(mitochondrial inner membrane);GO:0006627(protein processing involved in protein targeting to mitochondrion);GO:0008270(zinc ion binding)	COG0612(peptidase')	NA	NA	NA	NA(NA)	V7APM5.1 PF05193.19;Peptidase_M16_C;	up	yes
TRINITY_DN13995_c0_g1	1760	TRINITY_DN13995_c0_g1_i1;TRINITY_DN13995_c0_g1_i10;TRINITY_DN13995_c0_g1_i11;TRINITY_DN13995_c0_g1_i12;TRINITY_DN13995_c0_g1_i2;TRINITY_DN13995_c0_g1_i3;TRINITY_DN13995_c0_g1_i4;TRINITY_DN13995_c0_g1_i5;TRINITY_DN13995_c0_g1_i6;TRINITY_DN13995_c0_g1_i7;TR	PREDICTED: adenosine kinase 2 isoform X1 [Populus euphratica]	ADK1	Adenosine kinase 1 OS=Arabidopsis thaliana GN=ADK1 PE=1 SV=1	GO:0004001(adenosine kinase activity);GO:0005507(copper ion binding);GO:0005524(ATP binding);GO:0005634(nucleus);GO:0005737(cytoplasm);GO:0005829(cytosol);GO:0005886(plasma membrane);GO:0006169(adenosine salvage);GO:0009506(plasmodesma);GO:0009507(chlorop	COG0524(pfkb domain protein)	K00856	adenosine kinase	EC:2.7.1.20	nnu00230(Purine metabolism)	A0A061FV80.1 PF00294.22;PfkB;	no	no
TRINITY_DN10690_c0_g9	960	TRINITY_DN10690_c0_g9_i1	PREDICTED: switch-associated protein 70-like isoform X1 [Populus euphratica]	-	-	GO:0004674(protein serine/threonine kinase activity);GO:0005622(intracellular);GO:0018105(peptidyl-serine phosphorylation);GO:0035556(intracellular signal transduction)	ENOG41114AA(Domain-Containing protein)	-	-	-	-	-	no	no
TRINITY_DN14047_c0_g1	3961	TRINITY_DN14047_c0_g1_i1;TRINITY_DN14047_c0_g1_i2;TRINITY_DN14047_c0_g1_i3;TRINITY_DN14047_c0_g1_i4;TRINITY_DN14047_c0_g1_i5;TRINITY_DN14047_c0_g1_i6;TRINITY_DN14047_c0_g1_i7	UBP1-associated protein 2C [Populus trichocarpa]	UBA2C	UBP1-associated protein 2C OS=Arabidopsis thaliana GN=UBA2C PE=2 SV=1	GO:0003723(RNA binding);GO:0003729(mRNA binding);GO:0005634(nucleus);GO:0005730(nucleolus);GO:0005829(cytosol);GO:0006952(defense response);GO:0008219(cell death);GO:0009693(ethylene biosynthetic process);GO:0010150(leaf senescence)	COG0724(Rna-binding protein)	K12741	heterogeneous nuclear ribonucleoprotein A1/A3	-	vvi03040(Spliceosome)	A0A0D2R1K1.1 PF00076.20;RRM_1;	no	no
TRINITY_DN14054_c0_g3	1827	TRINITY_DN14054_c0_g3_i1	hypothetical protein MANES_11G048200 [Manihot esculenta]	NUP50B	Nuclear pore complex protein NUP50B OS=Arabidopsis thaliana GN=NUP50B PE=1 SV=1	GO:0005634(nucleus);GO:0005829(cytosol);GO:0008536(Ran GTPase binding);GO:0046827(positive regulation of protein export from nucleus);GO:0070412(R-SMAD binding)	COG5171(ran binding protein)	-	-	-	-	A0A0D2Q1B5.1 PF00638.16;Ran_BP1;	no	no
TRINITY_DN11319_c0_g1	1191	TRINITY_DN11319_c0_g1_i1;TRINITY_DN11319_c0_g1_i10;TRINITY_DN11319_c0_g1_i11;TRINITY_DN11319_c0_g1_i12;TRINITY_DN11319_c0_g1_i13;TRINITY_DN11319_c0_g1_i14;TRINITY_DN11319_c0_g1_i15;TRINITY_DN11319_c0_g1_i16;TRINITY_DN11319_c0_g1_i17;TRINITY_DN11319_c0_g1_	PREDICTED: 40S ribosomal protein S5 [Theobroma cacao]	RPS5	40S ribosomal protein S5 (Fragment) OS=Cicer arietinum GN=RPS5 PE=2 SV=1	GO:0000028(ribosomal small subunit assembly);GO:0003729(mRNA binding);GO:0003735(structural constituent of ribosome);GO:0006412(translation);GO:0019843(rRNA binding);GO:0022627(cytosolic small ribosomal subunit)	COG0049(One of the primary rRNA binding proteins, it binds directly to 16S rRNA where it nucleates assembly of the head domain of the 30S subunit. Is located at the subunit interface close to the decoding center, probably blocks exit of the E-site tRNA (B	K02989	small subunit ribosomal protein S5e	-	tcc03010(Ribosome)	M4E2W2.1 PF00177.19;Ribosomal_S7;	no	no
TRINITY_DN14080_c1_g5	1863	TRINITY_DN14080_c1_g5_i1;TRINITY_DN14080_c1_g5_i2	uncharacterized protein LOC110640325 isoform X1 [Hevea brasiliensis]	-	-	GO:0004674(protein serine/threonine kinase activity);GO:0005634(nucleus);GO:0046777(protein autophosphorylation)	ENOG410YH0S(PB1 domain)	NA	NA	NA	NA(NA)	B9HYN9.2 PF00564.22;PB1;	no	no
TRINITY_DN14106_c0_g1	1246	TRINITY_DN14106_c0_g1_i1;TRINITY_DN14106_c0_g1_i2;TRINITY_DN14106_c0_g1_i3;TRINITY_DN14106_c0_g1_i4;TRINITY_DN14106_c0_g1_i5;TRINITY_DN14106_c0_g1_i6	uncharacterized protein LOC110620182 [Manihot esculenta]	-	-	GO:0005506(iron ion binding);GO:0009507(chloroplast);GO:0009534(chloroplast thylakoid);GO:0009535(chloroplast thylakoid membrane);GO:0009941(chloroplast envelope);GO:0016021(integral component of membrane);GO:0046872(metal ion binding)	ENOG4110MKE(NA)	NA	NA	NA	NA(NA)	-	no	no
TRINITY_DN14109_c0_g1	1556	TRINITY_DN14109_c0_g1_i1;TRINITY_DN14109_c0_g1_i2;TRINITY_DN14109_c0_g1_i3	50S ribosomal protein L6, chloroplastic [Ricinus communis]	RPL6	50S ribosomal protein L6, chloroplastic OS=Arabidopsis thaliana GN=RPL6 PE=2 SV=1	GO:0002181(cytoplasmic translation);GO:0003723(RNA binding);GO:0003735(structural constituent of ribosome)	COG0097(This protein binds to the 23S rRNA, and is important in its secondary structure. It is located near the subunit interface in the base of the L7 L12 stalk, and near the tRNA binding site of the peptidyltransferase center (By similarity))	K02933	large subunit ribosomal protein L6	-	rcu03010(Ribosome)	A0A059DGQ0.1 PF00347.21;Ribosomal_L6;	no	no
TRINITY_DN14110_c0_g6	818	TRINITY_DN14110_c0_g6_i1	chloroplast envelope quinone oxidoreductase homolog [Prunus avium]	At4g13010	Putative quinone-oxidoreductase homolog, chloroplastic OS=Arabidopsis thaliana GN=At4g13010 PE=1 SV=1	GO:0005737(cytoplasm);GO:0005773(vacuole);GO:0005794(Golgi apparatus);GO:0005829(cytosol);GO:0005886(plasma membrane);GO:0008270(zinc ion binding);GO:0009507(chloroplast);GO:0009535(chloroplast thylakoid membrane);GO:0009706(chloroplast inner membrane);GO	COG0604(alcohol dehydrogenase)	NA	NA	NA	NA(NA)	M5W883.1 PF13602.4;ADH_zinc_N_2;	no	no
TRINITY_DN14122_c0_g3	976	TRINITY_DN14122_c0_g3_i1;TRINITY_DN14122_c0_g3_i2;TRINITY_DN14122_c0_g3_i3;TRINITY_DN14122_c0_g3_i4	glutathione S-transferase F4 [Populus yatungensis]	-	Glutathione S-transferase OS=Hyoscyamus muticus PE=1 SV=1	GO:0004364(glutathione transferase activity);GO:0005737(cytoplasm);GO:0006749(glutathione metabolic process)	COG0625(glutathione Stransferase)	K00799	glutathione S-transferase	EC:2.5.1.18	pper00480(Glutathione metabolism)	A0A078IPP8.1 PF00043.23;GST_C;	no	no
TRINITY_DN14125_c0_g3	1296	TRINITY_DN14125_c0_g3_i1;TRINITY_DN14125_c0_g3_i2;TRINITY_DN14125_c0_g3_i3;TRINITY_DN14125_c0_g3_i4	chlorophyllase-1, chloroplastic [Populus trichocarpa]	CLH1	Chlorophyllase-1 OS=Arabidopsis thaliana GN=CLH1 PE=1 SV=1	GO:0005773(vacuole);GO:0009507(chloroplast);GO:0015996(chlorophyll catabolic process);GO:0042742(defense response to bacterium);GO:0047746(chlorophyllase activity);GO:0050832(defense response to fungus);GO:0102293(pheophytinase b activity)	ENOG410XWBW(chlorophyllase (EC 3.1.1.14))	K08099	chlorophyllase	EC:3.1.1.14	hbr00860(Porphyrin and chlorophyll metabolism)	U7E1L9.1 PF07224.9;Chlorophyllase;	no	no
TRINITY_DN14129_c0_g2	1340	TRINITY_DN14129_c0_g2_i1;TRINITY_DN14129_c0_g2_i2;TRINITY_DN14129_c0_g2_i3;TRINITY_DN14129_c0_g2_i4;TRINITY_DN14129_c0_g2_i5	glucan endo-1,3-beta-glucosidase, basic isoform [Populus trichocarpa]	GNS1	Glucan endo-1,3-beta-glucosidase, basic isoform OS=Prunus persica GN=GNS1 PE=3 SV=1	GO:0005618(cell wall);GO:0005773(vacuole);GO:0008810(cellulase activity);GO:0030247(polysaccharide binding);GO:0046658(anchored component of plasma membrane)	ENOG410YAHP(glucan endo-1-3-beta-glucosidase)	K19893	glucan endo-1,3-beta-glucosidase 5/6	EC:3.2.1.39	sind00500(Starch and sucrose metabolism)	U5FNT7.1 PF00332.16;Glyco_hydro_17;	no	no
TRINITY_DN14141_c0_g5	1485	TRINITY_DN14141_c0_g5_i1;TRINITY_DN14141_c0_g5_i2	2,3-bisphosphoglycerate-independent phosphoglycerate mutase [Chenopodium quinoa]	-	2,3-bisphosphoglycerate-independent phosphoglycerate mutase OS=Ricinus communis PE=1 SV=2	GO:0005737(cytoplasm);GO:0005740(mitochondrial envelope);GO:0005829(cytosol);GO:0005886(plasma membrane);GO:0006007(glucose catabolic process);GO:0006096(glycolytic process);GO:0009409(response to cold);GO:0009506(plasmodesma);GO:0009507(chloroplast);GO:0	COG0696(Catalyzes the interconversion of 2-phosphoglycerate and 3-phosphoglycerate (By similarity))	K15633	2,3-bisphosphoglycerate-independent phosphoglycerate mutase	EC:5.4.2.12	jcu00010(Glycolysis / Gluconeogenesis);jcu00260(Glycine, serine and threonine metabolism)	A0A0J8D1F3.1 PF01676.16;Metalloenzyme;	no	no
TRINITY_DN14143_c0_g2	1308	TRINITY_DN14143_c0_g2_i1;TRINITY_DN14143_c0_g2_i2;TRINITY_DN14143_c0_g2_i3;TRINITY_DN14143_c0_g2_i4	eukaryotic translation initiation factor 3 subunit I [Jatropha curcas]	TIF3I1	Eukaryotic translation initiation factor 3 subunit I OS=Arabidopsis thaliana GN=TIF3I1 PE=2 SV=2	GO:0000166(nucleotide binding);GO:0005737(cytoplasm);GO:0009506(plasmodesma);GO:0080008(Cul4-RING E3 ubiquitin ligase complex)	ENOG410XQ3E(Component of the eukaryotic translation initiation factor 3 (eIF-3) complex, which is involved in protein synthesis and, together with other initiation factors, stimulates binding of mRNA and methionyl-tRNAi to the 40S ribosome (By similarity)	K03246	translation initiation factor 3 subunit I	-	jcu03013(RNA transport)	W9SJS4.1 PF00400.30;WD40;	up	yes
TRINITY_DN14172_c0_g2	1556	TRINITY_DN14172_c0_g2_i1;TRINITY_DN14172_c0_g2_i2;TRINITY_DN14172_c0_g2_i3;TRINITY_DN14172_c0_g2_i4;TRINITY_DN14172_c0_g2_i5	craniofacial development protein 1 isoform X1 [Populus trichocarpa]	CFDP1	Craniofacial development protein 1 OS=Gallus gallus GN=CFDP1 PE=2 SV=1	GO:0003674(molecular_function);GO:0005634(nucleus);GO:0008150(biological_process)	ENOG4111H9K(Craniofacial development protein)	-	-	-	-	W9RWY2.1 PF07572.10;BCNT;	no	no
TRINITY_DN14215_c0_g1	2158	TRINITY_DN14215_c0_g1_i1;TRINITY_DN14215_c0_g1_i2;TRINITY_DN14215_c0_g1_i3	ATP sulfurylase 2-like [Manihot esculenta]	APS2	ATP sulfurylase 2 OS=Arabidopsis thaliana GN=APS2 PE=1 SV=1	GO:0000103(sulfate assimilation);GO:0004020(adenylylsulfate kinase activity)	COG2046(Catalyzes the first intracellular reaction of sulfate assimilation, forming adenosine-5'-phosphosulfate (APS) from inorganic sulfate and ATP. Plays an important role in sulfate activation as a component of the biosynthesis pathway of sulfur- conta	K13811	3'-phosphoadenosine 5'-phosphosulfate synthase	EC:2.7.7.4 2.7.1.25	jcu00920(Sulfur metabolism);jcu00230(Purine metabolism);jcu00450(Selenocompound metabolism);jcu00261(Monobactam biosynthesis)	A0A0J8BHV5.1 PF01747.15;ATP-sulfurylase;	no	no
TRINITY_DN14222_c0_g2	1698	TRINITY_DN14222_c0_g2_i1;TRINITY_DN14222_c0_g2_i2;TRINITY_DN14222_c0_g2_i3;TRINITY_DN14222_c0_g2_i4;TRINITY_DN14222_c0_g2_i5;TRINITY_DN14222_c0_g2_i6;TRINITY_DN14222_c0_g2_i7;TRINITY_DN14222_c0_g2_i8;TRINITY_DN14222_c0_g2_i9	V-type proton ATPase subunit E [Populus trichocarpa]	VATE	V-type proton ATPase subunit E OS=Citrus unshiu GN=VATE PE=2 SV=1	GO:0005753(mitochondrial proton-transporting ATP synthase complex);GO:0005773(vacuole);GO:0005774(vacuolar membrane);GO:0015986(ATP synthesis coupled proton transport);GO:0015991(ATP hydrolysis coupled proton transport);GO:0033178(proton-transporting two-	COG1390(Produces ATP from ADP in the presence of a proton gradient across the membrane (By similarity))	K02150	V-type H+-transporting ATPase subunit E	-	hbr00190(Oxidative phosphorylation);hbr04145(Phagosome)	B9N7W9.1 PF01991.16;vATP-synt_E;	no	no
TRINITY_DN14231_c0_g4	1101	TRINITY_DN14231_c0_g4_i1;TRINITY_DN14231_c0_g4_i2;TRINITY_DN14231_c0_g4_i3;TRINITY_DN14231_c0_g4_i4;TRINITY_DN14231_c0_g4_i5	PREDICTED: probable plastid-lipid-associated protein 4, chloroplastic [Populus euphratica]	PAP4	Probable plastid-lipid-associated protein 4, chloroplastic OS=Arabidopsis thaliana GN=PAP4 PE=2 SV=1	GO:0005198(structural molecule activity);GO:0008150(biological_process);GO:0009507(chloroplast);GO:0009534(chloroplast thylakoid);GO:0009535(chloroplast thylakoid membrane);GO:0010287(plastoglobule)	ENOG4111HBZ(plastid-lipid-associated protein 4)	NA	NA	NA	NA(NA)	A0A067L464.1 PF04755.10;PAP_fibrillin;	no	no
TRINITY_DN14244_c0_g3	697	TRINITY_DN14244_c0_g3_i1;TRINITY_DN14244_c0_g3_i2	PREDICTED: 60S ribosomal protein L37a-1 [Juglans regia]	Os01g0679700	60S ribosomal protein L37a-1 OS=Oryza sativa subsp. japonica GN=Os01g0679700 PE=1 SV=1	GO:0003735(structural constituent of ribosome);GO:0005737(cytoplasm);GO:0005829(cytosol);GO:0005840(ribosome);GO:0006412(translation);GO:0022625(cytosolic large ribosomal subunit);GO:0042254(ribosome biogenesis);GO:0046872(metal ion binding)	COG1997(Ribosomal protein)	K02921	large subunit ribosomal protein L37Ae	-	cpap03010(Ribosome)	C5XVB4.1 PF01780.17;Ribosomal_L37ae;	no	no
TRINITY_DN14249_c0_g8	993	TRINITY_DN14249_c0_g8_i1	60S ribosomal protein L6-3-like [Ziziphus jujuba]	RPL6	60S ribosomal protein L6 OS=Mesembryanthemum crystallinum GN=RPL6 PE=2 SV=1	GO:0000027(ribosomal large subunit assembly);GO:0002181(cytoplasmic translation);GO:0003735(structural constituent of ribosome);GO:0022625(cytosolic large ribosomal subunit)	COG2163((ribosomal) protein)	K02934	large subunit ribosomal protein L6e	-	zju03010(Ribosome)	A0A0A0K9V0.1 PF01159.17;Ribosomal_L6e;	no	no
TRINITY_DN10713_c0_g6	1307	TRINITY_DN10713_c0_g6_i1;TRINITY_DN10713_c0_g6_i2	PREDICTED: NAD(P)H-quinone oxidoreductase subunit M, chloroplastic [Populus euphratica]	ndhM	NAD(P)H-quinone oxidoreductase subunit M, chloroplastic OS=Populus jackii GN=ndhM PE=2 SV=1	GO:0009507(chloroplast);GO:0009535(chloroplast thylakoid membrane);GO:0010258(NADH dehydrogenase complex (plastoquinone) assembly);GO:0010598(NAD(P)H dehydrogenase complex (plastoquinone));GO:0016655(oxidoreductase activity, acting on NAD(P)H, quinone or	ENOG4111NC5(electron donor, via FMN and iron-sulfur (Fe-S) centers, to quinones in the respiratory and or the photosynthetic chain. The immediate electron acceptor for the enzyme in this species is believed to be plastoquinone. Couples the redox reaction	-	-	-	-	B9S2T3.1 PF10664.7;NdhM;	no	no
TRINITY_DN14274_c0_g4	1204	TRINITY_DN14274_c0_g4_i1;TRINITY_DN14274_c0_g4_i2;TRINITY_DN14274_c0_g4_i3;TRINITY_DN14274_c0_g4_i4	50S ribosomal protein L27, chloroplastic [Populus trichocarpa]	RPL27	50S ribosomal protein L27, chloroplastic OS=Oryza sativa subsp. japonica GN=RPL27 PE=2 SV=1	GO:0003735(structural constituent of ribosome);GO:0005762(mitochondrial large ribosomal subunit)	COG0211(50S ribosomal protein l27)	K02899	large subunit ribosomal protein L27	-	hbr03010(Ribosome)	A0A0D2NLR5.1 PF01016.17;Ribosomal_L27;	no	no
TRINITY_DN10718_c0_g4	3162	TRINITY_DN10718_c0_g4_i1;TRINITY_DN10718_c0_g4_i2;TRINITY_DN10718_c0_g4_i3;TRINITY_DN10718_c0_g4_i4	cell division cycle protein 48 homolog [Jatropha curcas]	CDC48	Cell division cycle protein 48 homolog OS=Glycine max GN=CDC48 PE=2 SV=1	GO:0005515(protein binding);GO:0005524(ATP binding);GO:0005654(nucleoplasm);GO:0005730(nucleolus);GO:0005794(Golgi apparatus);GO:0005829(cytosol);GO:0005856(cytoskeleton);GO:0005886(plasma membrane);GO:0007049(cell cycle);GO:0009524(phragmoplast);GO:00150	COG0464(Aaa atpase)	K13525	transitional endoplasmic reticulum ATPase	-	jcu04141(Protein processing in endoplasmic reticulum)	K4C9L4.1 PF00004.27;AAA;	no	no
TRINITY_DN14294_c0_g4	1004	TRINITY_DN14294_c0_g4_i1;TRINITY_DN14294_c0_g4_i2	temperature-induced lipocalin-1 [Carica papaya]	TIL	Temperature-induced lipocalin-1 OS=Arabidopsis thaliana GN=TIL PE=1 SV=1	GO:0005215(transporter activity);GO:0005576(extracellular region);GO:0005737(cytoplasm);GO:0005739(mitochondrion);GO:0005773(vacuole);GO:0005774(vacuolar membrane);GO:0005783(endoplasmic reticulum);GO:0005794(Golgi apparatus);GO:0005829(cytosol);GO:000588	COG3040(Outer membrane lipoprotein)	NA	NA	NA	NA(NA)	A0A067L3I0.1 PF08212.10;Lipocalin_2;	no	no
TRINITY_DN14300_c0_g2	2708	TRINITY_DN14300_c0_g2_i1;TRINITY_DN14300_c0_g2_i2	PREDICTED: uncharacterized protein LOC105139805 isoform X2 [Populus euphratica]	-	-	GO:0005829(cytosol);GO:0008150(biological_process);GO:0009507(chloroplast)	ENOG410YFGR(NA)	-	-	-	-	-	no	no
TRINITY_DN14306_c0_g1	1229	TRINITY_DN14306_c0_g1_i1;TRINITY_DN14306_c0_g1_i2;TRINITY_DN14306_c0_g1_i3	chloroplast stem-loop binding protein of 41 kDa b, chloroplastic [Jatropha curcas]	CSP41B	Chloroplast stem-loop binding protein of 41 kDa b, chloroplastic OS=Arabidopsis thaliana GN=CSP41B PE=1 SV=1	GO:0000272(polysaccharide catabolic process);GO:0000427(plastid-encoded plastid RNA polymerase complex);GO:0003677(DNA binding);GO:0003723(RNA binding);GO:0003824(catalytic activity);GO:0005515(protein binding);GO:0005773(vacuole);GO:0005777(peroxisome);G	ENOG410XQQI(Nad-dependent epimerase dehydratase)	K05605	3-hydroxyisobutyryl-CoA hydrolase	EC:3.1.2.4	han00640(Propanoate metabolism);han00280(Valine, leucine and isoleucine degradation);han00410(beta-Alanine metabolism)	B9RFM2.1 PF01370.19;Epimerase;	no	no
TRINITY_DN14311_c0_g1	4082	TRINITY_DN14311_c0_g1_i1;TRINITY_DN14311_c0_g1_i2;TRINITY_DN14311_c0_g1_i3;TRINITY_DN14311_c0_g1_i4;TRINITY_DN14311_c0_g1_i5;TRINITY_DN14311_c0_g1_i6;TRINITY_DN14311_c0_g1_i7;TRINITY_DN14311_c0_g1_i8;TRINITY_DN14311_c0_g1_i9	probable splicing factor 3A subunit 1 [Rosa chinensis]	At1g14650	Probable splicing factor 3A subunit 1 OS=Arabidopsis thaliana GN=At1g14650 PE=1 SV=2	GO:0000381(regulation of alternative mRNA splicing, via spliceosome);GO:0000389(mRNA 3'-splice site recognition);GO:0003723(RNA binding);GO:0005686(U2 snRNP);GO:0071004(U2-type prespliceosome);GO:0071013(catalytic step 2 spliceosome)	ENOG410XPNW(Splicing factor 3A subunit)	K12825	splicing factor 3A subunit 1	-	fve03040(Spliceosome)	B9SR88.1 PF12230.6;PRP21_like_P;	no	no
TRINITY_DN14315_c0_g1	1402	TRINITY_DN14315_c0_g1_i1;TRINITY_DN14315_c0_g1_i2;TRINITY_DN14315_c0_g1_i3;TRINITY_DN14315_c0_g1_i4;TRINITY_DN14315_c0_g1_i5	hypothetical protein JCGZ_00411 [Jatropha curcas]	-	-	GO:0003674(molecular_function);GO:0006954(inflammatory response);GO:0009507(chloroplast);GO:0051707(response to other organism)	ENOG41122MF(Macrophage migration inhibitory factor)	K07253	phenylpyruvate tautomerase	EC:5.3.2.1	dct00350(Tyrosine metabolism);dct00360(Phenylalanine metabolism)	A0A067JTG0.1 PF01187.16;MIF;	no	no
TRINITY_DN10728_c0_g1	1789	TRINITY_DN10728_c0_g1_i1;TRINITY_DN10728_c0_g1_i10;TRINITY_DN10728_c0_g1_i11;TRINITY_DN10728_c0_g1_i12;TRINITY_DN10728_c0_g1_i13;TRINITY_DN10728_c0_g1_i14;TRINITY_DN10728_c0_g1_i15;TRINITY_DN10728_c0_g1_i2;TRINITY_DN10728_c0_g1_i3;TRINITY_DN10728_c0_g1_i4	chloroplast stem-loop binding protein of 41 kDa a, chloroplastic [Herrania umbratica]	CSP41A	Chloroplast stem-loop binding protein of 41 kDa a, chloroplastic OS=Arabidopsis thaliana GN=CSP41A PE=1 SV=1	GO:0003729(mRNA binding);GO:0003824(catalytic activity);GO:0005515(protein binding);GO:0006364(rRNA processing);GO:0008266(poly(U) RNA binding);GO:0009507(chloroplast);GO:0009534(chloroplast thylakoid);GO:0009570(chloroplast stroma);GO:0009579(thylakoid);	ENOG410ZXC4(NAD dependent epimerase/dehydratase family)	-	-	-	-	B9GSN8.1 PF01370.19;Epimerase;	no	no
TRINITY_DN14325_c0_g1	999	TRINITY_DN14325_c0_g1_i1	nucleoside diphosphate kinase 2, chloroplastic [Ricinus communis]	NDPK2	Nucleoside diphosphate kinase 2, chloroplastic OS=Nicotiana tabacum GN=NDPK2 PE=1 SV=1	GO:0004550(nucleoside diphosphate kinase activity);GO:0005622(intracellular);GO:0006163(purine nucleotide metabolic process);GO:0006220(pyrimidine nucleotide metabolic process);GO:0009142(nucleoside triphosphate biosynthetic process)	COG0105(Major role in the synthesis of nucleoside triphosphates other than ATP. The ATP gamma phosphate is transferred to the NDP beta phosphate via a ping-pong mechanism, using a phosphorylated active-site intermediate (By similarity))	K00940	nucleoside-diphosphate kinase	EC:2.7.4.6	rcu00230(Purine metabolism);rcu00240(Pyrimidine metabolism);rcu04016(MAPK signaling pathway - plant)	M5WN95.1 PF00334.17;NDK;	no	no
TRINITY_DN14355_c0_g3	4450	TRINITY_DN14355_c0_g3_i1;TRINITY_DN14355_c0_g3_i2;TRINITY_DN14355_c0_g3_i3;TRINITY_DN14355_c0_g3_i4;TRINITY_DN14355_c0_g3_i5;TRINITY_DN14355_c0_g3_i6;TRINITY_DN14355_c0_g3_i7;TRINITY_DN14355_c0_g3_i8	probable serine/threonine-protein kinase SIS8 [Manihot esculenta]	EDR1	Serine/threonine-protein kinase EDR1 OS=Arabidopsis thaliana GN=EDR1 PE=1 SV=1	GO:0004712(protein serine/threonine/tyrosine kinase activity);GO:0005634(nucleus);GO:0005886(plasma membrane);GO:0016301(kinase activity)	COG0515(Serine Threonine protein kinase)	NA	NA	NA	NA(NA)	F6GSK1.1 PF07714.15;Pkinase_Tyr;	no	no
TRINITY_DN14356_c0_g3	1333	TRINITY_DN14356_c0_g3_i1;TRINITY_DN14356_c0_g3_i2;TRINITY_DN14356_c0_g3_i3;TRINITY_DN14356_c0_g3_i4	50S ribosomal protein L1, chloroplastic-like isoform X3 [Hevea brasiliensis]	RPL1	50S ribosomal protein L1, chloroplastic OS=Arabidopsis thaliana GN=RPL1 PE=1 SV=1	GO:0000470(maturation of LSU-rRNA);GO:0003723(RNA binding);GO:0005739(mitochondrion);GO:0006412(translation);GO:0022625(cytosolic large ribosomal subunit)	COG0081(Binds directly to 23S rRNA. The L1 stalk is quite mobile in the ribosome, and is involved in E site tRNA release (By similarity))	K02863	large subunit ribosomal protein L1	-	jcu03010(Ribosome)	F6HBE6.1 PF00687.19;Ribosomal_L1;	no	no
TRINITY_DN10113_c1_g5	658	TRINITY_DN10113_c1_g5_i1;TRINITY_DN10113_c1_g5_i2	glyceraldehyde-3-phosphate dehydrogenase, cytosolic-like [Manihot esculenta]	GAPC2	Glyceraldehyde-3-phosphate dehydrogenase GAPC2, cytosolic OS=Arabidopsis thaliana GN=GAPC2 PE=1 SV=1	GO:0003677(DNA binding);GO:0004365(glyceraldehyde-3-phosphate dehydrogenase (NAD+) (phosphorylating) activity);GO:0005507(copper ion binding);GO:0005618(cell wall);GO:0005634(nucleus);GO:0005730(nucleolus);GO:0005737(cytoplasm);GO:0005739(mitochondrion);G	COG0057(glyceraldehyde3phosphate dehydrogenase)	K00134	glyceraldehyde 3-phosphate dehydrogenase	EC:1.2.1.12	hbr00010(Glycolysis / Gluconeogenesis);hbr00710(Carbon fixation in photosynthetic organisms)	A0A022QHH4.1 PF00044.22;Gp_dh_N;	down	yes
TRINITY_DN14368_c0_g3	1038	TRINITY_DN14368_c0_g3_i1;TRINITY_DN14368_c0_g3_i2	thylakoid lumenal 15 kDa protein 1, chloroplastic [Populus trichocarpa]	At2g44920	Thylakoid lumenal 15 kDa protein 1, chloroplastic OS=Arabidopsis thaliana GN=At2g44920 PE=1 SV=2	GO:0005515(protein binding);GO:0009507(chloroplast);GO:0009534(chloroplast thylakoid);GO:0009535(chloroplast thylakoid membrane);GO:0009543(chloroplast thylakoid lumen);GO:0009579(thylakoid);GO:0031977(thylakoid lumen)	ENOG4111W3N(Pentapeptide repeat-containing protein)	-	-	-	-	-	no	no
TRINITY_DN14370_c0_g4	2733	TRINITY_DN14370_c0_g4_i1;TRINITY_DN14370_c0_g4_i2;TRINITY_DN14370_c0_g4_i3	far upstream element-binding protein 1-like [Hevea brasiliensis]	FUBP1	Far upstream element-binding protein 1 OS=Homo sapiens GN=FUBP1 PE=1 SV=3	GO:0003676(nucleic acid binding);GO:0003729(mRNA binding);GO:0005829(cytosol)	ENOG410XZYE(Far upstream element (FUSE) binding protein)	NA	NA	NA	NA(NA)	A0A067KD14.1 PF00013.27;KH_1;	no	no
TRINITY_DN14380_c0_g1	1874	TRINITY_DN14380_c0_g1_i1;TRINITY_DN14380_c0_g1_i10;TRINITY_DN14380_c0_g1_i11;TRINITY_DN14380_c0_g1_i12;TRINITY_DN14380_c0_g1_i13;TRINITY_DN14380_c0_g1_i14;TRINITY_DN14380_c0_g1_i15;TRINITY_DN14380_c0_g1_i2;TRINITY_DN14380_c0_g1_i3;TRINITY_DN14380_c0_g1_i4	PREDICTED: hydroxyacylglutathione hydrolase cytoplasmic isoform X1 [Theobroma cacao]	GLX2-2	Hydroxyacylglutathione hydrolase cytoplasmic OS=Arabidopsis thaliana GN=GLX2-2 PE=1 SV=2	GO:0004416(hydroxyacylglutathione hydrolase activity);GO:0005737(cytoplasm);GO:0005829(cytosol);GO:0019243(methylglyoxal catabolic process to D-lactate via S-lactoyl-glutathione);GO:0046872(metal ion binding)	COG0491(Beta-lactamase domain protein)	K01069	hydroxyacylglutathione hydrolase	EC:3.1.2.6	rcu00620(Pyruvate metabolism)	B9N1T0.1 PF00753.25;Lactamase_B;	no	no
TRINITY_DN14385_c0_g1	1668	TRINITY_DN14385_c0_g1_i1;TRINITY_DN14385_c0_g1_i2	PREDICTED: probable L-ascorbate peroxidase 6, chloroplastic isoform X1 [Populus euphratica]	APX6	Probable L-ascorbate peroxidase 6, chloroplastic OS=Oryza sativa subsp. japonica GN=APX6 PE=2 SV=1	GO:0009533(chloroplast stromal thylakoid);GO:0009535(chloroplast thylakoid membrane);GO:0016688(L-ascorbate peroxidase activity)	COG0376(Bifunctional enzyme with both catalase and broad- spectrum peroxidase activity (By similarity))	K00434	L-ascorbate peroxidase	EC:1.11.1.11	hbr00053(Ascorbate and aldarate metabolism);hbr00480(Glutathione metabolism)	A0A067GYQ0.1 PF00141.21;peroxidase;	no	no
TRINITY_DN14385_c0_g2	2134	TRINITY_DN14385_c0_g2_i1;TRINITY_DN14385_c0_g2_i10;TRINITY_DN14385_c0_g2_i11;TRINITY_DN14385_c0_g2_i12;TRINITY_DN14385_c0_g2_i13;TRINITY_DN14385_c0_g2_i2;TRINITY_DN14385_c0_g2_i3;TRINITY_DN14385_c0_g2_i4;TRINITY_DN14385_c0_g2_i5;TRINITY_DN14385_c0_g2_i6;T	L-ascorbate peroxidase T isoform 3 [Theobroma cacao]	APXS	L-ascorbate peroxidase S, chloroplastic/mitochondrial OS=Arabidopsis thaliana GN=APXS PE=1 SV=2	GO:0009533(chloroplast stromal thylakoid);GO:0009535(chloroplast thylakoid membrane);GO:0016688(L-ascorbate peroxidase activity)	COG0376(Bifunctional enzyme with both catalase and broad- spectrum peroxidase activity (By similarity))	K00434	L-ascorbate peroxidase	EC:1.11.1.11	hbr00053(Ascorbate and aldarate metabolism);hbr00480(Glutathione metabolism)	B9H7G1.2 PF00141.21;peroxidase;	no	no
TRINITY_DN14406_c0_g2	1850	TRINITY_DN14406_c0_g2_i1;TRINITY_DN14406_c0_g2_i2;TRINITY_DN14406_c0_g2_i3;TRINITY_DN14406_c0_g2_i4	uncharacterized protein LOC110643184 isoform X2 [Hevea brasiliensis]	-	-	GO:0005774(vacuolar membrane);GO:0005783(endoplasmic reticulum);GO:0005794(Golgi apparatus);GO:0016021(integral component of membrane)	ENOG410YA5V(DNA repair ATPase-related)	-	-	-	-	U5G8W3.1 PF15742.3;DUF4686;	up	yes
TRINITY_DN14416_c0_g2	2582	TRINITY_DN14416_c0_g2_i1;TRINITY_DN14416_c0_g2_i2;TRINITY_DN14416_c0_g2_i3;TRINITY_DN14416_c0_g2_i4;TRINITY_DN14416_c0_g2_i5;TRINITY_DN14416_c0_g2_i6;TRINITY_DN14416_c0_g2_i7;TRINITY_DN14416_c0_g2_i8;TRINITY_DN14416_c0_g2_i9	nucleolin 1 [Jatropha curcas]	NUCL1	Nucleolin 1 OS=Arabidopsis thaliana GN=NUCL1 PE=1 SV=1	GO:0000478(endonucleolytic cleavage involved in rRNA processing);GO:0003676(nucleic acid binding);GO:0003677(DNA binding);GO:0003729(mRNA binding);GO:0005730(nucleolus);GO:0005739(mitochondrion);GO:0005829(cytosol);GO:0006364(rRNA processing);GO:0010305(l	COG0724(Rna-binding protein)	NA	NA	NA	NA(NA)	A0A067LGM1.1 PF00076.20;RRM_1;	no	no
TRINITY_DN14433_c0_g1	2311	TRINITY_DN14433_c0_g1_i1;TRINITY_DN14433_c0_g1_i2;TRINITY_DN14433_c0_g1_i3;TRINITY_DN14433_c0_g1_i4;TRINITY_DN14433_c0_g1_i5;TRINITY_DN14433_c0_g1_i6;TRINITY_DN14433_c0_g1_i7	rhodanese-like/PpiC domain-containing protein 12, chloroplastic [Populus trichocarpa]	At5g19370	Rhodanese-like/PpiC domain-containing protein 12, chloroplastic OS=Arabidopsis thaliana GN=At5g19370 PE=1 SV=1	GO:0009507(chloroplast);GO:0009735(response to cytokinin);GO:0016853(isomerase activity)	COG0607(Rhodanese domain protein);COG0760(peptidyl-prolyl cis-trans isomerase)	-	-	-	-	W9RAX5.1 PF13616.4;Rotamase_3;	no	no
TRINITY_DN14440_c0_g6	916	TRINITY_DN14440_c0_g6_i1;TRINITY_DN14440_c0_g6_i2	PREDICTED: uncharacterized protein LOC105127308 [Populus euphratica]	-	-	GO:0003674(molecular_function);GO:0005634(nucleus);GO:0008150(biological_process);GO:0009507(chloroplast);GO:0009535(chloroplast thylakoid membrane)	ENOG410XZGC(NA)	-	-	-	-	-	no	no
TRINITY_DN14442_c0_g6	425	TRINITY_DN14442_c0_g6_i1;TRINITY_DN14442_c0_g6_i2	endochitinase CH25-like [Carica papaya]	-	Endochitinase OS=Phaseolus vulgaris PE=1 SV=1	GO:0004568(chitinase activity);GO:0050832(defense response to fungus)	COG3979(chitinase)	K20547	basic endochitinase B	EC:3.2.1.14	cpap00520(Amino sugar and nucleotide sugar metabolism);cpap04016(MAPK signaling pathway - plant)	V4U8Z2.1 PF00182.17;Glyco_hydro_19;	no	no
TRINITY_DN11539_c0_g4	1084	TRINITY_DN11539_c0_g4_i1	Splicing factor-like protein [Parasponia andersonii]	RZ1C	Glycine-rich RNA-binding protein RZ1C OS=Arabidopsis thaliana GN=RZ1C PE=1 SV=1	GO:0003676(nucleic acid binding);GO:0003682(chromatin binding);GO:0003723(RNA binding);GO:0003729(mRNA binding);GO:0005634(nucleus);GO:0005730(nucleolus);GO:0008270(zinc ion binding);GO:0009409(response to cold);GO:0009414(response to water deprivation);G	ENOG410YAMW(Zinc knuckle)	K12885	heterogeneous nuclear ribonucleoprotein G	-	cit03040(Spliceosome)	A0A022RJE6.1 PF00076.20;RRM_1;	up	yes
TRINITY_DN14458_c0_g1	1597	TRINITY_DN14458_c0_g1_i1;TRINITY_DN14458_c0_g1_i2;TRINITY_DN14458_c0_g1_i3;TRINITY_DN14458_c0_g1_i4;TRINITY_DN14458_c0_g1_i5;TRINITY_DN14458_c0_g1_i6;TRINITY_DN14458_c0_g1_i7	2-dehydro-3-deoxyphosphooctonate aldolase [Citrus clementina]	KDSA	2-dehydro-3-deoxyphosphooctonate aldolase OS=Pisum sativum GN=KDSA PE=2 SV=1	GO:0008676(3-deoxy-8-phosphooctulonate synthase activity);GO:0019294(keto-3-deoxy-D-manno-octulosonic acid biosynthetic process)	COG2877(Phospho-2-dehydro-3-deoxyoctonate aldolase)	NA	NA	NA	NA(NA)	V7B483.1 PF00793.18;DAHP_synth_1;	no	no
TRINITY_DN14459_c0_g1	2084	TRINITY_DN14459_c0_g1_i1;TRINITY_DN14459_c0_g1_i2;TRINITY_DN14459_c0_g1_i3;TRINITY_DN14459_c0_g1_i4	activator of 90 kDa heat shock protein ATPase homolog [Manihot esculenta]	AHSA1	Activator of 90 kDa heat shock protein ATPase homolog 1 OS=Homo sapiens GN=AHSA1 PE=1 SV=1	GO:0001671(ATPase activator activity);GO:0005634(nucleus);GO:0005829(cytosol);GO:0006950(response to stress);GO:0051087(chaperone binding)	COG5580(AHA1, activator of heat shock 90kDa protein ATPase homolog)	NA	NA	NA	NA(NA)	B9IIB3.2 PF09229.9;Aha1_N;	no	no
TRINITY_DN14498_c0_g3	1979	TRINITY_DN14498_c0_g3_i1;TRINITY_DN14498_c0_g3_i2;TRINITY_DN14498_c0_g3_i3;TRINITY_DN14498_c0_g3_i4;TRINITY_DN14498_c0_g3_i5	PREDICTED: putative G3BP-like protein isoform X3 [Populus euphratica]	nxt3	Putative G3BP-like protein OS=Schizosaccharomyces pombe (strain 972 / ATCC 24843) GN=nxt3 PE=1 SV=1	GO:0003723(RNA binding);GO:0003729(mRNA binding);GO:0005829(cytosol);GO:0006913(nucleocytoplasmic transport);GO:0009737(response to abscisic acid)	ENOG410YV57(GTPase activating protein (SH3 domain) binding protein)	NA	NA	NA	NA(NA)	B9N049.1 PF02136.18;NTF2;	no	no
TRINITY_DN14500_c1_g3	4039	TRINITY_DN14500_c1_g3_i1;TRINITY_DN14500_c1_g3_i2;TRINITY_DN14500_c1_g3_i3	PREDICTED: linoleate 13S-lipoxygenase 2-1, chloroplastic-like [Populus euphratica]	LOX2.1	Linoleate 13S-lipoxygenase 2-1, chloroplastic OS=Solanum tuberosum GN=LOX2.1 PE=1 SV=1	GO:0016165(linoleate 13S-lipoxygenase activity)	ENOG410YN4N(Plant lipoxygenase may be involved in a number of diverse aspects of plant physiology including growth and development, pest resistance, and senescence or responses to wounding (By similarity))	K00454	lipoxygenase	EC:1.13.11.12	rcu00591(Linoleic acid metabolism);rcu00592(alpha-Linolenic acid metabolism)	B9RI74.1 PF00305.17;Lipoxygenase;	no	no
TRINITY_DN14516_c0_g1	1990	TRINITY_DN14516_c0_g1_i1;TRINITY_DN14516_c0_g1_i2;TRINITY_DN14516_c0_g1_i3;TRINITY_DN14516_c0_g1_i4;TRINITY_DN14516_c0_g1_i5;TRINITY_DN14516_c0_g1_i6;TRINITY_DN14516_c0_g1_i7;TRINITY_DN14516_c0_g1_i8;TRINITY_DN14516_c0_g1_i9	zinc finger CCCH domain-containing protein 40-like [Hevea brasiliensis]	Os07g0281000	Zinc finger CCCH domain-containing protein 49 OS=Oryza sativa subsp. japonica GN=Os07g0281000 PE=2 SV=1	GO:0000387(spliceosomal snRNP assembly);GO:0000974(Prp19 complex);GO:0017070(U6 snRNA binding);GO:0036002(pre-mRNA binding);GO:0071006(U2-type catalytic step 1 spliceosome);GO:0071007(U2-type catalytic step 2 spliceosome)	ENOG410XSFK(RNA binding motif protein 22)	K12872	pre-mRNA-splicing factor RBM22/SLT11	-	hbr03040(Spliceosome)	I1LW99.1 PF16131.3;Torus;	no	no
TRINITY_DN10748_c0_g5	1198	TRINITY_DN10748_c0_g5_i1	lactoylglutathione lyase [Jatropha curcas]	-	Lactoylglutathione lyase OS=Cicer arietinum PE=2 SV=1	GO:0004462(lactoylglutathione lyase activity);GO:0005516(calmodulin binding);GO:0005829(cytosol);GO:0005975(carbohydrate metabolic process);GO:0009507(chloroplast);GO:0019243(methylglyoxal catabolic process to D-lactate via S-lactoyl-glutathione);GO:00466	ENOG4111FDV(Lactoylglutathione lyase)	K01759	lactoylglutathione lyase	EC:4.4.1.5	jcu00620(Pyruvate metabolism)	A0A067L685.1 PF00903.23;Glyoxalase;	no	no
TRINITY_DN14553_c0_g1	2719	TRINITY_DN14553_c0_g1_i1;TRINITY_DN14553_c0_g1_i10;TRINITY_DN14553_c0_g1_i11;TRINITY_DN14553_c0_g1_i2;TRINITY_DN14553_c0_g1_i3;TRINITY_DN14553_c0_g1_i4;TRINITY_DN14553_c0_g1_i5;TRINITY_DN14553_c0_g1_i6;TRINITY_DN14553_c0_g1_i7;TRINITY_DN14553_c0_g1_i8;TRI	threonine dehydratase biosynthetic, chloroplastic [Carica papaya]	OMR1	Threonine dehydratase biosynthetic, chloroplastic OS=Arabidopsis thaliana GN=OMR1 PE=1 SV=1	GO:0004794(L-threonine ammonia-lyase activity);GO:0005737(cytoplasm);GO:0009097(isoleucine biosynthetic process);GO:0030170(pyridoxal phosphate binding)	COG1171(Threonine dehydratase)	K01754	threonine dehydratase	EC:4.3.1.19	cpap00260(Glycine, serine and threonine metabolism);cpap00290(Valine, leucine and isoleucine biosynthesis)	A0A059DEW0.1 PF00291.23;PALP;	down	yes
TRINITY_DN14558_c0_g8	6826	TRINITY_DN14558_c0_g8_i1	DExH-box ATP-dependent RNA helicase DExH12-like [Manihot esculenta]	BRR2A	DExH-box ATP-dependent RNA helicase DExH12 OS=Arabidopsis thaliana GN=BRR2A PE=1 SV=1	GO:0003723(RNA binding);GO:0004386(helicase activity);GO:0005515(protein binding);GO:0005524(ATP binding);GO:0005634(nucleus);GO:0005681(spliceosomal complex);GO:0005730(nucleolus);GO:0005829(cytosol);GO:0006397(mRNA processing);GO:0008026(ATP-dependent h	COG1204(helicase)	K12854	pre-mRNA-splicing helicase BRR2	EC:3.6.4.13	hbr03040(Spliceosome)	A0A067KKI7.1 PF02889.14;Sec63;	no	no
TRINITY_DN10753_c0_g1	784	TRINITY_DN10753_c0_g1_i1;TRINITY_DN10753_c0_g1_i2;TRINITY_DN10753_c0_g1_i3;TRINITY_DN10753_c0_g1_i4	major allergen Pru av 1-like [Herrania umbratica]	-	Major allergen Mal d 1 OS=Malus domestica PE=1 SV=3	GO:0004864(protein phosphatase inhibitor activity);GO:0005634(nucleus);GO:0005737(cytoplasm);GO:0009738(abscisic acid-activated signaling pathway);GO:0010427(abscisic acid binding);GO:0080163(regulation of protein serine/threonine phosphatase activity)	ENOG410ZD18(Pathogenesis-related protein)	-	-	-	-	A0A061EPN8.1 PF00407.17;Bet_v_1;	no	no
TRINITY_DN14561_c0_g5	1139	TRINITY_DN14561_c0_g5_i1;TRINITY_DN14561_c0_g5_i2	PREDICTED: photosystem I reaction center subunit III, chloroplastic-like [Populus euphratica]	PSAF	Photosystem I reaction center subunit III, chloroplastic OS=Arabidopsis thaliana GN=PSAF PE=1 SV=1	GO:0003674(molecular_function);GO:0009507(chloroplast);GO:0009534(chloroplast thylakoid);GO:0009535(chloroplast thylakoid membrane);GO:0009538(photosystem I reaction center);GO:0009579(thylakoid);GO:0009941(chloroplast envelope);GO:0010287(plastoglobule);	ENOG4111JQH(photosystem i)	K02694	photosystem I subunit III	-	jcu00195(Photosynthesis)	A0A0B0Q044.1 PF02507.13;PSI_PsaF;	no	no
TRINITY_DN14566_c1_g3	1260	TRINITY_DN14566_c1_g3_i1;TRINITY_DN14566_c1_g3_i2;TRINITY_DN14566_c1_g3_i3;TRINITY_DN14566_c1_g3_i4	Photosystem I reaction center subunit IV A, chloroplastic [Mucuna pruriens]	PSAEB	Photosystem I reaction center subunit IV B, chloroplastic OS=Nicotiana sylvestris GN=PSAEB PE=1 SV=1	GO:0009507(chloroplast);GO:0009534(chloroplast thylakoid);GO:0009535(chloroplast thylakoid membrane);GO:0009538(photosystem I reaction center);GO:0009579(thylakoid);GO:0009735(response to cytokinin);GO:0009941(chloroplast envelope);GO:0010287(plastoglobul	ENOG41122QJ(Stabilizes the interaction between PsaC and the PSI core, assists the docking of the ferredoxin to PSI and interacts with ferredoxin-NADP oxidoreductase (By similarity))	K02693	photosystem I subunit IV	-	jcu00195(Photosynthesis)	A0A061F1M8.1 PF02427.15;PSI_PsaE;	no	no
TRINITY_DN14573_c0_g1	1840	TRINITY_DN14573_c0_g1_i1;TRINITY_DN14573_c0_g1_i2;TRINITY_DN14573_c0_g1_i3;TRINITY_DN14573_c0_g1_i4;TRINITY_DN14573_c0_g1_i5;TRINITY_DN14573_c0_g1_i6;TRINITY_DN14573_c0_g1_i7;TRINITY_DN14573_c0_g1_i8	chaperonin CPN60-2, mitochondrial [Populus trichocarpa]	CPN60-2	Chaperonin CPN60-2, mitochondrial OS=Cucurbita maxima GN=CPN60-2 PE=1 SV=1	GO:0005507(copper ion binding);GO:0005524(ATP binding);GO:0005739(mitochondrion);GO:0005759(mitochondrial matrix);GO:0005774(vacuolar membrane);GO:0005794(Golgi apparatus);GO:0005829(cytosol);GO:0006458('de novo' protein folding);GO:0007005(mitochondrion	COG0459(Prevents misfolding and promotes the refolding and proper assembly of unfolded polypeptides generated under stress conditions (By similarity))	K04077	chaperonin GroEL	-	hbr03018(RNA degradation)	A0A067K3N8.1 PF00118.22;Cpn60_TCP1;	no	no
TRINITY_DN14581_c0_g2	3484	TRINITY_DN14581_c0_g2_i1;TRINITY_DN14581_c0_g2_i2	uncharacterized protein LOC18105314 isoform X4 [Populus trichocarpa]	-	-	GO:0005634(nucleus);GO:0008150(biological_process)	ENOG410Z7Z7(Pentatricopeptide repeat-containing protein)	-	-	-	-	-	no	no
TRINITY_DN10755_c0_g1	2168	TRINITY_DN10755_c0_g1_i1;TRINITY_DN10755_c0_g1_i2;TRINITY_DN10755_c0_g1_i3;TRINITY_DN10755_c0_g1_i4	6-phosphogluconate dehydrogenase, decarboxylating 3 [Hevea brasiliensis]	At3g02360	6-phosphogluconate dehydrogenase, decarboxylating 3 OS=Arabidopsis thaliana GN=At3g02360 PE=2 SV=1	GO:0004616(phosphogluconate dehydrogenase (decarboxylating) activity);GO:0005515(protein binding);GO:0005737(cytoplasm);GO:0005777(peroxisome);GO:0005829(cytosol);GO:0006098(pentose-phosphate shunt);GO:0009570(chloroplast stroma);GO:0009651(response to sa	COG0362(Catalyzes the oxidative decarboxylation of 6- phosphogluconate to ribulose 5-phosphate and CO(2), with concomitant reduction of NADP to NADPH (By similarity))	K00033	6-phosphogluconate dehydrogenase	EC:1.1.1.44 1.1.1.343	hbr00030(Pentose phosphate pathway);hbr00480(Glutathione metabolism)	M4FDK1.1 PF00393.17;6PGD;	no	no
TRINITY_DN14599_c2_g3	694	TRINITY_DN14599_c2_g3_i1;TRINITY_DN14599_c2_g3_i2	PREDICTED: 40S ribosomal protein S25-like [Populus euphratica]	RPS25	40S ribosomal protein S25 OS=Solanum lycopersicum GN=RPS25 PE=3 SV=1	GO:0003735(structural constituent of ribosome);GO:0005737(cytoplasm);GO:0005774(vacuolar membrane);GO:0005794(Golgi apparatus);GO:0005840(ribosome);GO:0006412(translation);GO:0009506(plasmodesma);GO:0022626(cytosolic ribosome);GO:0022627(cytosolic small r	COG4901(Ribosomal protein S25)	K02975	small subunit ribosomal protein S25e	-	gmx03010(Ribosome)	A0A059AN16.1 PF03297.13;Ribosomal_S25;	no	no
TRINITY_DN14602_c0_g1	1612	TRINITY_DN14602_c0_g1_i1;TRINITY_DN14602_c0_g1_i2	succinate dehydrogenase [ubiquinone] iron-sulfur subunit 2, mitochondrial-like isoform X1 [Hevea brasiliensis]	SDH2-2	Succinate dehydrogenase [ubiquinone] iron-sulfur subunit 2, mitochondrial OS=Arabidopsis thaliana GN=SDH2-2 PE=1 SV=2	GO:0000104(succinate dehydrogenase activity);GO:0005739(mitochondrion);GO:0005743(mitochondrial inner membrane);GO:0005749(mitochondrial respiratory chain complex II, succinate dehydrogenase complex (ubiquinone));GO:0006099(tricarboxylic acid cycle);GO:00	COG0479(succinate dehydrogenase)	K00235	succinate dehydrogenase (ubiquinone) iron-sulfur subunit	EC:1.3.5.1	hbr00020(Citrate cycle (TCA cycle));hbr00190(Oxidative phosphorylation)	A0A0D3E0G9.1 PF13085.4;Fer2_3;	no	no
TRINITY_DN14607_c0_g2	1129	TRINITY_DN14607_c0_g2_i1;TRINITY_DN14607_c0_g2_i2;TRINITY_DN14607_c0_g2_i3;TRINITY_DN14607_c0_g2_i4;TRINITY_DN14607_c0_g2_i5;TRINITY_DN14607_c0_g2_i6;TRINITY_DN14607_c0_g2_i7;TRINITY_DN14607_c0_g2_i8;TRINITY_DN14607_c0_g2_i9	60S ribosomal protein L10a-2 [Ricinus communis]	RPL10AB	60S ribosomal protein L10a-2 OS=Arabidopsis thaliana GN=RPL10AB PE=1 SV=1	GO:0000470(maturation of LSU-rRNA);GO:0003723(RNA binding);GO:0006412(translation);GO:0022625(cytosolic large ribosomal subunit)	COG0081(Binds directly to 23S rRNA. The L1 stalk is quite mobile in the ribosome, and is involved in E site tRNA release (By similarity))	K02865	large subunit ribosomal protein L10Ae	-	rcu03010(Ribosome)	U5GMU8.1 PF00687.19;Ribosomal_L1;	no	no
TRINITY_DN14616_c0_g3	2329	TRINITY_DN14616_c0_g3_i1;TRINITY_DN14616_c0_g3_i2;TRINITY_DN14616_c0_g3_i3;TRINITY_DN14616_c0_g3_i4;TRINITY_DN14616_c0_g3_i5	PREDICTED: phosphoglucomutase, cytoplasmic [Populus euphratica]	PGM1	Phosphoglucomutase, cytoplasmic OS=Populus tremula GN=PGM1 PE=2 SV=1	GO:0004614(phosphoglucomutase activity);GO:0005829(cytosol);GO:0005978(glycogen biosynthetic process);GO:0006006(glucose metabolic process);GO:0009570(chloroplast stroma);GO:0009590(detection of gravity);GO:0010319(stromule);GO:0019252(starch biosynthetic	COG0033(phosphoglucomutase)	K01835	phosphoglucomutase	EC:5.4.2.2	rcu00010(Glycolysis / Gluconeogenesis);rcu00030(Pentose phosphate pathway);rcu00052(Galactose metabolism);rcu00500(Starch and sucrose metabolism);rcu00520(Amino sugar and nucleotide sugar metabolism);rcu00230(Purine metabolism)	V4W5U2.1 PF02878.14;PGM_PMM_I;	up	yes
TRINITY_DN14617_c0_g3	1187	TRINITY_DN14617_c0_g3_i1	ras-related protein RABA1d [Ricinus communis]	RABA1C	Ras-related protein RABA1c OS=Arabidopsis thaliana GN=RABA1C PE=2 SV=1	GO:0003924(GTPase activity);GO:0005525(GTP binding);GO:0005634(nucleus);GO:0005768(endosome);GO:0005773(vacuole);GO:0005829(cytosol);GO:0005886(plasma membrane);GO:0015031(protein transport);GO:0042546(cell wall biogenesis)	COG1100(GTP-binding Protein)	K07904	Ras-related protein Rab-11A	-	rcu04144(Endocytosis)	M1CRH4.1 PF00071.20;Ras;	no	no
TRINITY_DN14620_c1_g5	452	TRINITY_DN14620_c1_g5_i1;TRINITY_DN14620_c1_g5_i2	hypothetical protein CUMW_223350 [Citrus unshiu]	CSP41B	Chloroplast stem-loop binding protein of 41 kDa b, chloroplastic OS=Arabidopsis thaliana GN=CSP41B PE=1 SV=1	GO:0000272(polysaccharide catabolic process);GO:0000427(plastid-encoded plastid RNA polymerase complex);GO:0003677(DNA binding);GO:0003723(RNA binding);GO:0003824(catalytic activity);GO:0005515(protein binding);GO:0005773(vacuole);GO:0005777(peroxisome);G	ENOG410XQQI(Nad-dependent epimerase dehydratase)	-	-	-	-	-	no	no
TRINITY_DN14668_c0_g1	4407	TRINITY_DN14668_c0_g1_i1;TRINITY_DN14668_c0_g1_i2;TRINITY_DN14668_c0_g1_i3;TRINITY_DN14668_c0_g1_i4;TRINITY_DN14668_c0_g1_i5;TRINITY_DN14668_c0_g1_i6	enhancer of mRNA-decapping protein 4-like isoform X1 [Manihot esculenta]	VCS	Enhancer of mRNA-decapping protein 4 OS=Arabidopsis thaliana GN=VCS PE=1 SV=1	GO:0000166(nucleotide binding);GO:0000932(P-body);GO:0003729(mRNA binding);GO:0005515(protein binding);GO:0005634(nucleus);GO:0005829(cytosol);GO:0006397(mRNA processing);GO:0006402(mRNA catabolic process);GO:0009791(post-embryonic development);GO:0009965	ENOG410XP6V(Enhancer of mRNA decapping 4)	K12616	enhancer of mRNA-decapping protein 4	-	hbr03018(RNA degradation)	A0A067JYI4.1 PF16529.3;Ge1_WD40;	no	no
TRINITY_DN14668_c0_g2	1320	TRINITY_DN14668_c0_g2_i1	malate dehydrogenase, mitochondrial [Ricinus communis]	MMDH	Malate dehydrogenase, mitochondrial OS=Citrullus lanatus GN=MMDH PE=1 SV=1	GO:0005507(copper ion binding);GO:0005618(cell wall);GO:0005739(mitochondrion);GO:0005759(mitochondrial matrix);GO:0005794(Golgi apparatus);GO:0005829(cytosol);GO:0005975(carbohydrate metabolic process);GO:0006099(tricarboxylic acid cycle);GO:0006108(mala	COG0039(Catalyzes the reversible oxidation of malate to oxaloacetate (By similarity))	K00026	malate dehydrogenase	EC:1.1.1.37	rcu00020(Citrate cycle (TCA cycle));rcu00620(Pyruvate metabolism);rcu00630(Glyoxylate and dicarboxylate metabolism);rcu00710(Carbon fixation in photosynthetic organisms);rcu00270(Cysteine and methionine metabolism)	K4DCV3.1 PF02866.16;Ldh_1_C;	no	no
TRINITY_DN14675_c0_g2	1549	TRINITY_DN14675_c0_g2_i1	thioredoxin-like protein CDSP32, chloroplastic [Manihot esculenta]	CDSP32	Thioredoxin-like protein CDSP32, chloroplastic OS=Arabidopsis thaliana GN=CDSP32 PE=1 SV=1	GO:0000103(sulfate assimilation);GO:0005737(cytoplasm);GO:0006457(protein folding);GO:0015035(protein disulfide oxidoreductase activity);GO:0016671(oxidoreductase activity, acting on a sulfur group of donors, disulfide as acceptor);GO:0034599(cellular res	COG0526(Thioredoxin)	NA	NA	NA	NA(NA)	K4BVS6.1 PF00085.18;Thioredoxin;	no	no
TRINITY_DN14678_c1_g3	3173	TRINITY_DN14678_c1_g3_i1	granule-bound starch synthase 2, chloroplastic/amyloplastic [Populus trichocarpa]	SS2	Granule-bound starch synthase 2, chloroplastic/amyloplastic OS=Solanum tuberosum GN=SS2 PE=1 SV=3	GO:0004373(glycogen (starch) synthase activity);GO:0009011(starch synthase activity);GO:0009501(amyloplast);GO:0009507(chloroplast);GO:0010021(amylopectin biosynthetic process);GO:0016757(transferase activity, transferring glycosyl groups);GO:0019252(star	COG0297(starch synthase activity)	K00703	starch synthase	EC:2.4.1.21	rcu00500(Starch and sucrose metabolism)	F6H5U3.1 PF08323.9;Glyco_transf_5;	no	no
TRINITY_DN10766_c0_g2	1794	TRINITY_DN10766_c0_g2_i1;TRINITY_DN10766_c0_g2_i2;TRINITY_DN10766_c0_g2_i3;TRINITY_DN10766_c0_g2_i4;TRINITY_DN10766_c0_g2_i5;TRINITY_DN10766_c0_g2_i6;TRINITY_DN10766_c0_g2_i7;TRINITY_DN10766_c0_g2_i8	hypothetical protein B456_008G010500 [Gossypium raimondii]	FOLD2	Bifunctional protein FolD 2 OS=Arabidopsis thaliana GN=FOLD2 PE=2 SV=1	GO:0004477(methenyltetrahydrofolate cyclohydrolase activity);GO:0004488(methylenetetrahydrofolate dehydrogenase (NADP+) activity);GO:0005829(cytosol);GO:0006730(one-carbon metabolic process)	COG0190(Catalyzes the oxidation of 5,10- methylenetetrahydrofolate to 5,10-methenyltetrahydrofolate and then the hydrolysis of 5,10-methenyltetrahydrofolate to 10- formyltetrahydrofolate (By similarity))	K00288	methylenetetrahydrofolate dehydrogenase (NADP+) / methenyltetrahydrofolate cyclohydrolase / formyltetrahydrofolate synthetase	EC:1.5.1.5 3.5.4.9 6.3.4.3	egr00670(One carbon pool by folate)	U5G1W5.1 PF00763.21;THF_DHG_CYH;	no	no
TRINITY_DN14724_c0_g1	1492	TRINITY_DN14724_c0_g1_i1;TRINITY_DN14724_c0_g1_i2;TRINITY_DN14724_c0_g1_i3;TRINITY_DN14724_c0_g1_i4;TRINITY_DN14724_c0_g1_i5	spermidine synthase 1 [Populus trichocarpa]	-	Spermidine synthase OS=Coffea arabica PE=2 SV=1	GO:0004766(spermidine synthase activity);GO:0006596(polyamine biosynthetic process)	COG0421(Catalyzes the production of spermidine from putrescine and decarboxylated S-adenosylmethionine (dcSAM), which serves as an aminopropyl donor (By similarity))	K00797	spermidine synthase	EC:2.5.1.16	hbr00270(Cysteine and methionine metabolism);hbr00330(Arginine and proline metabolism);hbr00410(beta-Alanine metabolism);hbr00480(Glutathione metabolism)	B9HVB2.1 PF01564.15;Spermine_synth;	no	no
TRINITY_DN14729_c2_g1	1115	TRINITY_DN14729_c2_g1_i1;TRINITY_DN14729_c2_g1_i2;TRINITY_DN14729_c2_g1_i3	uncharacterized protein LOC111484314 [Cucurbita maxima]	-	-	GO:0003674(molecular_function);GO:0008150(biological_process);GO:0009507(chloroplast);GO:0009535(chloroplast thylakoid membrane);GO:0009536(plastid);GO:0009706(chloroplast inner membrane);GO:0009941(chloroplast envelope);GO:0016020(membrane);GO:0016021(in	ENOG41129VE(NA)	-	-	-	-	-	no	no
TRINITY_DN14729_c2_g3	4216	TRINITY_DN14729_c2_g3_i1;TRINITY_DN14729_c2_g3_i2	PREDICTED: putative nuclear matrix constituent protein 1-like protein isoform X1 [Populus euphratica]	CRWN1	Protein CROWDED NUCLEI 1 OS=Arabidopsis thaliana GN=CRWN1 PE=1 SV=1	GO:0005634(nucleus);GO:0005652(nuclear lamina);GO:0005829(cytosol);GO:0006997(nucleus organization);GO:0034399(nuclear periphery)	ENOG4111KVI(Nuclear matrix constituent protein)	K00826	branched-chain amino acid aminotransferase	EC:2.6.1.42	bna00270(Cysteine and methionine metabolism);bna00280(Valine, leucine and isoleucine degradation);bna00290(Valine, leucine and isoleucine biosynthesis);bna00770(Pantothenate and CoA biosynthesis)	-	no	no
TRINITY_DN14731_c0_g1	2255	TRINITY_DN14731_c0_g1_i1;TRINITY_DN14731_c0_g1_i10;TRINITY_DN14731_c0_g1_i11;TRINITY_DN14731_c0_g1_i12;TRINITY_DN14731_c0_g1_i13;TRINITY_DN14731_c0_g1_i14;TRINITY_DN14731_c0_g1_i15;TRINITY_DN14731_c0_g1_i16;TRINITY_DN14731_c0_g1_i17;TRINITY_DN14731_c0_g1_	PREDICTED: protein notum homolog [Populus euphratica]	PAE11	Pectin acetylesterase 11 OS=Arabidopsis thaliana GN=PAE11 PE=2 SV=1	GO:0005576(extracellular region);GO:0005618(cell wall);GO:0005829(cytosol);GO:0005886(plasma membrane);GO:0009505(plant-type cell wall);GO:0009506(plasmodesma);GO:0052689(carboxylic ester hydrolase activity);GO:0052793(pectin acetylesterase activity);GO:0	ENOG410XQKD(pectinacetylesterase)	NA	NA	NA	NA(NA)	B9N0N1.1 PF03283.11;PAE;	no	no
TRINITY_DN14731_c0_g3	1517	TRINITY_DN14731_c0_g3_i1;TRINITY_DN14731_c0_g3_i2;TRINITY_DN14731_c0_g3_i3	PREDICTED: gamma carbonic anhydrase 1, mitochondrial-like [Juglans regia]	GAMMACA1	Gamma carbonic anhydrase 1, mitochondrial OS=Arabidopsis thaliana GN=GAMMACA1 PE=1 SV=1	GO:0004089(carbonate dehydratase activity);GO:0005737(cytoplasm);GO:0005739(mitochondrion);GO:0005747(mitochondrial respiratory chain complex I);GO:0009853(photorespiration);GO:0031966(mitochondrial membrane);GO:0045271(respiratory chain complex I);GO:004	COG0663(Transferase)	-	-	-	-	A0A0D2QLP1.1 PF00132.22;Hexapep;	no	no
TRINITY_DN14731_c0_g4	1448	TRINITY_DN14731_c0_g4_i1	Bacterial transferase hexapeptide repeat [Macleaya cordata]	GAMMACA1	Gamma carbonic anhydrase 1, mitochondrial OS=Arabidopsis thaliana GN=GAMMACA1 PE=1 SV=1	GO:0004089(carbonate dehydratase activity);GO:0005737(cytoplasm);GO:0005739(mitochondrion);GO:0005747(mitochondrial respiratory chain complex I);GO:0009853(photorespiration);GO:0031966(mitochondrial membrane);GO:0045271(respiratory chain complex I);GO:004	COG0663(Transferase)	-	-	-	-	D7KAT8.1 PF14290.4;DUF4370;	no	no
TRINITY_DN14734_c0_g3	1847	TRINITY_DN14734_c0_g3_i1;TRINITY_DN14734_c0_g3_i2;TRINITY_DN14734_c0_g3_i3;TRINITY_DN14734_c0_g3_i4	ubiquitin carboxyl-terminal hydrolase 7-like [Hevea brasiliensis]	UBP7	Ubiquitin carboxyl-terminal hydrolase 7 OS=Arabidopsis thaliana GN=UBP7 PE=1 SV=1	GO:0004843(thiol-dependent ubiquitin-specific protease activity);GO:0005516(calmodulin binding);GO:0005634(nucleus);GO:0006511(ubiquitin-dependent protein catabolic process);GO:0009506(plasmodesma);GO:0016579(protein deubiquitination);GO:0036459(thiol-dep	ENOG410XP96(ubiquitin thiolesterase activity)	NA	NA	NA	NA(NA)	A0A067L0R2.1 PF00443.27;UCH;	down	yes
TRINITY_DN14764_c0_g1	2350	TRINITY_DN14764_c0_g1_i1;TRINITY_DN14764_c0_g1_i10;TRINITY_DN14764_c0_g1_i2;TRINITY_DN14764_c0_g1_i3;TRINITY_DN14764_c0_g1_i4;TRINITY_DN14764_c0_g1_i5;TRINITY_DN14764_c0_g1_i6;TRINITY_DN14764_c0_g1_i7;TRINITY_DN14764_c0_g1_i8;TRINITY_DN14764_c0_g1_i9	serine hydroxymethyltransferase, mitochondrial [Jatropha curcas]	-	Serine hydroxymethyltransferase, mitochondrial OS=Solanum tuberosum PE=2 SV=1	GO:0004372(glycine hydroxymethyltransferase activity);GO:0005515(protein binding);GO:0005634(nucleus);GO:0005739(mitochondrion);GO:0005759(mitochondrial matrix);GO:0005829(cytosol);GO:0005886(plasma membrane);GO:0006544(glycine metabolic process);GO:00065	COG0112(Catalyzes the reversible interconversion of serine and glycine with tetrahydrofolate (THF) serving as the one-carbon carrier. This reaction serves as the major source of one-carbon groups required for the biosynthesis of purines, thymidylate, meth	K00600	glycine hydroxymethyltransferase	EC:2.1.2.1	jcu00630(Glyoxylate and dicarboxylate metabolism);jcu00260(Glycine, serine and threonine metabolism);jcu00460(Cyanoamino acid metabolism);jcu00670(One carbon pool by folate)	A0A067LAI0.1 PF00464.17;SHMT;	no	no
TRINITY_DN14764_c0_g3	2021	TRINITY_DN14764_c0_g3_i1;TRINITY_DN14764_c0_g3_i2	serine hydroxymethyltransferase, mitochondrial [Jatropha curcas]	-	Serine hydroxymethyltransferase, mitochondrial OS=Solanum tuberosum PE=2 SV=1	GO:0004372(glycine hydroxymethyltransferase activity);GO:0005739(mitochondrion);GO:0005747(mitochondrial respiratory chain complex I);GO:0005829(cytosol);GO:0006544(glycine metabolic process);GO:0006563(L-serine metabolic process);GO:0008270(zinc ion bind	COG0112(Catalyzes the reversible interconversion of serine and glycine with tetrahydrofolate (THF) serving as the one-carbon carrier. This reaction serves as the major source of one-carbon groups required for the biosynthesis of purines, thymidylate, meth	K00600	glycine hydroxymethyltransferase	EC:2.1.2.1	jcu00630(Glyoxylate and dicarboxylate metabolism);jcu00260(Glycine, serine and threonine metabolism);jcu00460(Cyanoamino acid metabolism);jcu00670(One carbon pool by folate)	A0A067LAI0.1 PF00464.17;SHMT;	up	yes
TRINITY_DN10775_c0_g7	1616	TRINITY_DN10775_c0_g7_i1	protein EXORDIUM-like 2 [Manihot esculenta]	EXL2	Protein EXORDIUM-like 2 OS=Arabidopsis thaliana GN=EXL2 PE=2 SV=1	GO:0003674(molecular_function);GO:0005615(extracellular space);GO:0005618(cell wall);GO:0005794(Golgi apparatus);GO:0005829(cytosol);GO:0008150(biological_process);GO:0009505(plant-type cell wall);GO:0009506(plasmodesma);GO:0009507(chloroplast);GO:0048046	ENOG41107QF(phosphate-induced protein 1 conserved region domain containing protein, expressed)	-	-	-	-	A0A067L8T9.1 PF04674.10;Phi_1;	no	no
TRINITY_DN14785_c1_g1	4702	TRINITY_DN14785_c1_g1_i1;TRINITY_DN14785_c1_g1_i10;TRINITY_DN14785_c1_g1_i11;TRINITY_DN14785_c1_g1_i12;TRINITY_DN14785_c1_g1_i13;TRINITY_DN14785_c1_g1_i14;TRINITY_DN14785_c1_g1_i15;TRINITY_DN14785_c1_g1_i16;TRINITY_DN14785_c1_g1_i17;TRINITY_DN14785_c1_g1_	nucleolin isoform X4 [Jatropha curcas]	SYNCRIP	Heterogeneous nuclear ribonucleoprotein Q OS=Homo sapiens GN=SYNCRIP PE=1 SV=2	GO:0003723(RNA binding)	ENOG410YEFI(RNA recognition motif. (a.k.a. RRM, RBD, or RNP domain))	K12885	heterogeneous nuclear ribonucleoprotein G	-	lja03040(Spliceosome)	A0A067JY39.1 PF00076.20;RRM_1;	no	no
TRINITY_DN14786_c0_g4	1070	TRINITY_DN14786_c0_g4_i1	osmotin-like protein OSM34 [Populus trichocarpa]	OSM34	Osmotin-like protein OSM34 OS=Arabidopsis thaliana GN=OSM34 PE=2 SV=2	GO:0005576(extracellular region);GO:0009651(response to salt stress);GO:0009816(defense response to bacterium, incompatible interaction);GO:0009817(defense response to fungus, incompatible interaction);GO:0051707(response to other organism)	ENOG410YD4X(thaumatin-like protein)	NA	NA	NA	NA(NA)	B9GKL0.2 PF00314.15;Thaumatin;	no	no
TRINITY_DN14791_c0_g2	2999	TRINITY_DN14791_c0_g2_i1;TRINITY_DN14791_c0_g2_i10;TRINITY_DN14791_c0_g2_i11;TRINITY_DN14791_c0_g2_i12;TRINITY_DN14791_c0_g2_i13;TRINITY_DN14791_c0_g2_i2;TRINITY_DN14791_c0_g2_i3;TRINITY_DN14791_c0_g2_i4;TRINITY_DN14791_c0_g2_i5;TRINITY_DN14791_c0_g2_i6;T	PREDICTED: uncharacterized protein YIR042C-like [Populus euphratica]	yjcK	Putative ribosomal-protein-alanine acetyltransferase OS=Bacillus subtilis (strain 168) GN=yjcK PE=3 SV=1	GO:0006474(N-terminal protein amino acid acetylation);GO:0008080(N-acetyltransferase activity)	COG1670(-acetyltransferase)	-	-	-	-	A0A061EL46.1 PF13302.5;Acetyltransf_3;	no	no
TRINITY_DN14798_c1_g2	985	TRINITY_DN14798_c1_g2_i1	patellin-3-like [Manihot esculenta]	PATL3	Patellin-3 OS=Arabidopsis thaliana GN=PATL3 PE=1 SV=2	GO:0005215(transporter activity);GO:0005634(nucleus);GO:0005829(cytosol);GO:0005886(plasma membrane);GO:0006810(transport);GO:0007049(cell cycle);GO:0008289(lipid binding);GO:0051301(cell division)	ENOG410XRSQ(Transfer protein)	NA	NA	NA	NA(NA)	B9S729.1 PF03765.13;CRAL_TRIO_N;	no	no
TRINITY_DN14803_c0_g5	942	TRINITY_DN14803_c0_g5_i1;TRINITY_DN14803_c0_g5_i2	60S ribosomal protein L13-1-like isoform X1 [Hevea brasiliensis]	RPL13B	60S ribosomal protein L13-1 OS=Arabidopsis thaliana GN=RPL13B PE=1 SV=1	GO:0003723(RNA binding);GO:0003735(structural constituent of ribosome);GO:0006412(translation);GO:0022625(cytosolic large ribosomal subunit)	COG4352(cytoplasmic translation)	K02873	large subunit ribosomal protein L13e	-	hbr03010(Ribosome)	B9IIX6.2 PF01294.16;Ribosomal_L13e;	no	no
TRINITY_DN14808_c0_g2	1738	TRINITY_DN14808_c0_g2_i1;TRINITY_DN14808_c0_g2_i10;TRINITY_DN14808_c0_g2_i11;TRINITY_DN14808_c0_g2_i12;TRINITY_DN14808_c0_g2_i2;TRINITY_DN14808_c0_g2_i3;TRINITY_DN14808_c0_g2_i4;TRINITY_DN14808_c0_g2_i5;TRINITY_DN14808_c0_g2_i6;TRINITY_DN14808_c0_g2_i7;TR	probable aldo-keto reductase 1 isoform X1 [Hevea brasiliensis]	AKR1	Probable aldo-keto reductase 1 OS=Glycine max GN=AKR1 PE=2 SV=1	GO:0004033(aldo-keto reductase (NADP) activity);GO:0005737(cytoplasm);GO:0016491(oxidoreductase activity);GO:0055114(oxidation-reduction process)	COG0667(Aldo keto reductase)	K17744	L-galactose dehydrogenase	EC:1.1.1.316	fve00053(Ascorbate and aldarate metabolism)	A0A067JVV5.1 PF00248.19;Aldo_ket_red;	no	no
TRINITY_DN14811_c0_g1	1725	TRINITY_DN14811_c0_g1_i1;TRINITY_DN14811_c0_g1_i2	uncharacterized protein LOC110659403 [Hevea brasiliensis]	Msed_1424	Succinate-semialdehyde dehydrogenase (acetylating) OS=Metallosphaera sedula (strain ATCC 51363 / DSM 5348 / JCM 9185 / NBRC 15509 / TH2) GN=Msed_1424 PE=1 SV=1	GO:0005739(mitochondrion);GO:0008270(zinc ion binding);GO:0010033(response to organic substance);GO:0050897(cobalt ion binding)	COG1062(alcohol dehydrogenase)	K00121	S-(hydroxymethyl)glutathione dehydrogenase / alcohol dehydrogenase	EC:1.1.1.284 1.1.1.1	apro00010(Glycolysis / Gluconeogenesis);apro00071(Fatty acid degradation);apro00350(Tyrosine metabolism)	A0A061DNY9.1 PF08240.10;ADH_N;	no	no
TRINITY_DN14821_c0_g2	795	TRINITY_DN14821_c0_g2_i1;TRINITY_DN14821_c0_g2_i2;TRINITY_DN14821_c0_g2_i3	subtilisin-like protease SBT3.17 [Durio zibethinus]	SBT3.10	Subtilisin-like protease SBT3.10 OS=Arabidopsis thaliana GN=SBT3.10 PE=3 SV=2	GO:0004252(serine-type endopeptidase activity);GO:0004866(endopeptidase inhibitor activity);GO:0005829(cytosol);GO:0005886(plasma membrane)	ENOG41121HN(Peptidase inhibitor I9)	-	-	-	-	U5FSB6.1 PF05922.14;Inhibitor_I9;	no	no
TRINITY_DN14826_c1_g4	1807	TRINITY_DN14826_c1_g4_i1	PREDICTED: aspartate aminotransferase, mitochondrial [Populus euphratica]	ASP1	Aspartate aminotransferase, mitochondrial OS=Arabidopsis thaliana GN=ASP1 PE=1 SV=1	GO:0004069(L-aspartate:2-oxoglutarate aminotransferase activity);GO:0005739(mitochondrion);GO:0030170(pyridoxal phosphate binding);GO:0042802(identical protein binding)	COG1448(aminotransferase)	K14455	aspartate aminotransferase, mitochondrial	EC:2.6.1.1	jcu00710(Carbon fixation in photosynthetic organisms);jcu00250(Alanine, aspartate and glutamate metabolism);jcu00270(Cysteine and methionine metabolism);jcu00220(Arginine biosynthesis);jcu00330(Arginine and proline metabolism);jcu00350(Tyrosine metabolism	A0A0D2SPS4.1 PF00155.19;Aminotran_1_2;	no	no
TRINITY_DN14829_c2_g1	1628	TRINITY_DN14829_c2_g1_i1;TRINITY_DN14829_c2_g1_i2;TRINITY_DN14829_c2_g1_i3;TRINITY_DN14829_c2_g1_i4;TRINITY_DN14829_c2_g1_i5	PREDICTED: metalloendoproteinase 1-like [Populus euphratica]	-	Metalloendoproteinase 1 OS=Glycine max PE=1 SV=2	GO:0004222(metalloendopeptidase activity);GO:0005576(extracellular region);GO:0005886(plasma membrane);GO:0006508(proteolysis);GO:0007275(multicellular organism development);GO:0008270(zinc ion binding);GO:0009651(response to salt stress);GO:0009753(respo	ENOG410XQ5D(matrix metallopeptidase)	NA	NA	NA	NA(NA)	B9I890.2 PF00413.22;Peptidase_M10;	no	no
TRINITY_DN14830_c0_g7	1432	TRINITY_DN14830_c0_g7_i1;TRINITY_DN14830_c0_g7_i2	50S ribosomal protein L4, chloroplastic isoform X1 [Populus trichocarpa]	RPL4	50S ribosomal protein L4, chloroplastic OS=Arabidopsis thaliana GN=RPL4 PE=2 SV=2	GO:0003723(RNA binding);GO:0003735(structural constituent of ribosome);GO:0006412(translation);GO:0022626(cytosolic ribosome)	COG0088(One of the primary rRNA binding proteins, this protein initially binds near the 5'-end of the 23S rRNA. It is important during the early stages of 50S assembly. It makes multiple contacts with different domains of the 23S rRNA in the assembled 50S	K02926	large subunit ribosomal protein L4	-	jcu03010(Ribosome)	B9HD11.2 PF00573.20;Ribosomal_L4;	no	no
TRINITY_DN14832_c0_g2	4480	TRINITY_DN14832_c0_g2_i1;TRINITY_DN14832_c0_g2_i2;TRINITY_DN14832_c0_g2_i3;TRINITY_DN14832_c0_g2_i4;TRINITY_DN14832_c0_g2_i5;TRINITY_DN14832_c0_g2_i6	Tryptophan synthase [Trema orientale]	trpB2	Tryptophan synthase beta chain 2 OS=Aquifex aeolicus (strain VF5) GN=trpB2 PE=3 SV=1	GO:0000162(tryptophan biosynthetic process);GO:0005737(cytoplasm);GO:0030170(pyridoxal phosphate binding);GO:0052684(L-serine hydro-lyase (adding indole, L-tryptophan-forming) activity)	COG1350(The beta subunit is responsible for the synthesis of L- tryptophan from indole and L-serine (By similarity))	K06001	tryptophan synthase beta chain	EC:4.2.1.20	pmum00260(Glycine, serine and threonine metabolism);pmum00400(Phenylalanine, tyrosine and tryptophan biosynthesis)	U5FMX8.1 PF00291.23;PALP;	no	no
TRINITY_DN14834_c0_g1	1344	TRINITY_DN14834_c0_g1_i1	PREDICTED: soluble inorganic pyrophosphatase 1, chloroplastic-like [Populus euphratica]	PPA6	Soluble inorganic pyrophosphatase 6, chloroplastic OS=Arabidopsis thaliana GN=PPA6 PE=1 SV=1	GO:0000287(magnesium ion binding);GO:0004427(inorganic diphosphatase activity);GO:0005829(cytosol);GO:0006796(phosphate-containing compound metabolic process);GO:0009507(chloroplast);GO:0009536(plastid);GO:0009570(chloroplast stroma);GO:0009579(thylakoid)	COG0221(Pyrophosphate phospho-hydrolase)	K01507	inorganic pyrophosphatase	EC:3.6.1.1	hbr00190(Oxidative phosphorylation)	A0A067KI65.1 PF00719.17;Pyrophosphatase;	down	yes
TRINITY_DN14834_c0_g3	1422	TRINITY_DN14834_c0_g3_i1;TRINITY_DN14834_c0_g3_i10;TRINITY_DN14834_c0_g3_i2;TRINITY_DN14834_c0_g3_i3;TRINITY_DN14834_c0_g3_i4;TRINITY_DN14834_c0_g3_i5;TRINITY_DN14834_c0_g3_i6;TRINITY_DN14834_c0_g3_i7;TRINITY_DN14834_c0_g3_i8;TRINITY_DN14834_c0_g3_i9	soluble inorganic pyrophosphatase 6, chloroplastic [Ricinus communis]	PPA6	Soluble inorganic pyrophosphatase 6, chloroplastic OS=Arabidopsis thaliana GN=PPA6 PE=1 SV=1	GO:0000287(magnesium ion binding);GO:0004427(inorganic diphosphatase activity);GO:0005829(cytosol);GO:0006796(phosphate-containing compound metabolic process);GO:0009507(chloroplast);GO:0009536(plastid);GO:0009570(chloroplast stroma);GO:0009579(thylakoid)	COG0221(Pyrophosphate phospho-hydrolase)	K01507	inorganic pyrophosphatase	EC:3.6.1.1	rcu00190(Oxidative phosphorylation)	A0A067KI65.1 PF00719.17;Pyrophosphatase;	no	no
TRINITY_DN14834_c0_g5	3349	TRINITY_DN14834_c0_g5_i1;TRINITY_DN14834_c0_g5_i2;TRINITY_DN14834_c0_g5_i3;TRINITY_DN14834_c0_g5_i4	large proline-rich protein BAG6 isoform X2 [Jatropha curcas]	Bag6	Large proline-rich protein BAG6 OS=Mus musculus GN=Bag6 PE=1 SV=1	GO:0005634(nucleus);GO:0005829(cytosol)	ENOG4111JI8(Ubiquitin-2 like Rad60 SUMO-like)	K04523	ubiquilin	-	dosa04141(Protein processing in endoplasmic reticulum)	B9GQ45.2 PF00240.21;ubiquitin;	no	no
TRINITY_DN14838_c0_g4	1026	TRINITY_DN14838_c0_g4_i1	PREDICTED: coiled-coil domain-containing protein 12 [Juglans regia]	CCDC12	Coiled-coil domain-containing protein 12 OS=Homo sapiens GN=CCDC12 PE=1 SV=1	GO:0003674(molecular_function);GO:0005634(nucleus);GO:0008150(biological_process)	ENOG4111R31(Coiled-coil domain containing 12)	K12871	coiled-coil domain-containing protein 12	-	gra03040(Spliceosome)	A0A0A0LR08.1 PF08315.10;cwf18;	no	no
TRINITY_DN14864_c1_g1	1008	TRINITY_DN14864_c1_g1_i1	uncharacterized protein LOC21401857 [Morus notabilis]	-	-	GO:0005634(nucleus);GO:0008150(biological_process);GO:0048046(apoplast)	ENOG4111URZ(Protein of unknown function, DUF538)	-	-	-	-	A9PCV4.1 PF04398.10;DUF538;	up	yes
TRINITY_DN14870_c1_g2	2012	TRINITY_DN14870_c1_g2_i1;TRINITY_DN14870_c1_g2_i10;TRINITY_DN14870_c1_g2_i2;TRINITY_DN14870_c1_g2_i3;TRINITY_DN14870_c1_g2_i4;TRINITY_DN14870_c1_g2_i5;TRINITY_DN14870_c1_g2_i6;TRINITY_DN14870_c1_g2_i7;TRINITY_DN14870_c1_g2_i8;TRINITY_DN14870_c1_g2_i9	carbonic anhydrase, chloroplastic [Jatropha curcas]	-	Carbonic anhydrase, chloroplastic OS=Pisum sativum PE=1 SV=1	GO:0004089(carbonate dehydratase activity);GO:0005886(plasma membrane);GO:0008270(zinc ion binding);GO:0009409(response to cold);GO:0009507(chloroplast);GO:0009535(chloroplast thylakoid membrane);GO:0009570(chloroplast stroma);GO:0009579(thylakoid);GO:000	COG0288(carbonic anhydrase)	K01673	carbonic anhydrase	EC:4.2.1.1	jcu00910(Nitrogen metabolism)	A0A067LLS5.1 PF00484.17;Pro_CA;	no	no
TRINITY_DN14877_c1_g1	1794	TRINITY_DN14877_c1_g1_i1;TRINITY_DN14877_c1_g1_i10;TRINITY_DN14877_c1_g1_i11;TRINITY_DN14877_c1_g1_i12;TRINITY_DN14877_c1_g1_i13;TRINITY_DN14877_c1_g1_i14;TRINITY_DN14877_c1_g1_i2;TRINITY_DN14877_c1_g1_i3;TRINITY_DN14877_c1_g1_i4;TRINITY_DN14877_c1_g1_i5;	glyceraldehyde-3-phosphate dehydrogenase, cytosolic-like [Manihot esculenta]	GAPC1	Glyceraldehyde-3-phosphate dehydrogenase GAPC1, cytosolic OS=Arabidopsis thaliana GN=GAPC1 PE=1 SV=2	GO:0003677(DNA binding);GO:0004365(glyceraldehyde-3-phosphate dehydrogenase (NAD+) (phosphorylating) activity);GO:0005507(copper ion binding);GO:0005515(protein binding);GO:0005634(nucleus);GO:0005737(cytoplasm);GO:0005739(mitochondrion);GO:0005740(mitoch	COG0057(glyceraldehyde3phosphate dehydrogenase)	K00134	glyceraldehyde 3-phosphate dehydrogenase	EC:1.2.1.12	cit00010(Glycolysis / Gluconeogenesis);cit00710(Carbon fixation in photosynthetic organisms)	A0A022QHH4.1 PF02800.18;Gp_dh_C;	up	yes
TRINITY_DN14877_c1_g5	650	TRINITY_DN14877_c1_g5_i1	PREDICTED: glyceraldehyde-3-phosphate dehydrogenase, cytosolic [Vitis vinifera]	GAPC	Glyceraldehyde-3-phosphate dehydrogenase, cytosolic OS=Magnolia liliiflora GN=GAPC PE=2 SV=1	GO:0003677(DNA binding);GO:0004365(glyceraldehyde-3-phosphate dehydrogenase (NAD+) (phosphorylating) activity);GO:0005507(copper ion binding);GO:0005618(cell wall);GO:0005634(nucleus);GO:0005730(nucleolus);GO:0005737(cytoplasm);GO:0005739(mitochondrion);G	COG0057(glyceraldehyde3phosphate dehydrogenase)	K00134	glyceraldehyde 3-phosphate dehydrogenase	EC:1.2.1.12	vvi00010(Glycolysis / Gluconeogenesis);vvi00710(Carbon fixation in photosynthetic organisms)	A0A059AGY2.1 PF00044.22;Gp_dh_N;	no	no
TRINITY_DN14881_c0_g1	986	TRINITY_DN14881_c0_g1_i1;TRINITY_DN14881_c0_g1_i10;TRINITY_DN14881_c0_g1_i2;TRINITY_DN14881_c0_g1_i3;TRINITY_DN14881_c0_g1_i4;TRINITY_DN14881_c0_g1_i5;TRINITY_DN14881_c0_g1_i6;TRINITY_DN14881_c0_g1_i7;TRINITY_DN14881_c0_g1_i8;TRINITY_DN14881_c0_g1_i9	PREDICTED: 40S ribosomal protein S13 [Gossypium raimondii]	RPS13	40S ribosomal protein S13 OS=Glycine max GN=RPS13 PE=2 SV=1	GO:0003735(structural constituent of ribosome);GO:0005730(nucleolus);GO:0006412(translation);GO:0022627(cytosolic small ribosomal subunit);GO:0070181(small ribosomal subunit rRNA binding)	COG0184(Forms an intersubunit bridge (bridge B4) with the 23S rRNA of the 50S subunit in the ribosome (By similarity))	K02953	small subunit ribosomal protein S13e	-	gra03010(Ribosome)	A0A078DIQ0.1 PF00312.20;Ribosomal_S15;	no	no
TRINITY_DN14891_c1_g7	1379	TRINITY_DN14891_c1_g7_i1	40S ribosomal protein S17-3-like [Hevea brasiliensis]	RPS17	40S ribosomal protein S17 OS=Solanum lycopersicum GN=RPS17 PE=2 SV=3	GO:0000028(ribosomal small subunit assembly);GO:0022627(cytosolic small ribosomal subunit)	COG1383(Ribosomal protein)	K02962	small subunit ribosomal protein S17e	-	hbr03010(Ribosome)	A9PA24.1 PF00833.16;Ribosomal_S17e;	no	no
TRINITY_DN14897_c0_g2	2118	TRINITY_DN14897_c0_g2_i1;TRINITY_DN14897_c0_g2_i2;TRINITY_DN14897_c0_g2_i3;TRINITY_DN14897_c0_g2_i4;TRINITY_DN14897_c0_g2_i5;TRINITY_DN14897_c0_g2_i6	ketol-acid reductoisomerase, chloroplastic-like [Manihot esculenta]	At3g58610	Ketol-acid reductoisomerase, chloroplastic OS=Arabidopsis thaliana GN=At3g58610 PE=1 SV=2	GO:0004455(ketol-acid reductoisomerase activity);GO:0005507(copper ion binding);GO:0005618(cell wall);GO:0005739(mitochondrion);GO:0005829(cytosol);GO:0009082(branched-chain amino acid biosynthetic process);GO:0009097(isoleucine biosynthetic process);GO:0	COG0059(Alpha-keto-beta-hydroxylacyl reductoisomerase)	K00053	ketol-acid reductoisomerase	EC:1.1.1.86	rcu00290(Valine, leucine and isoleucine biosynthesis);rcu00770(Pantothenate and CoA biosynthesis)	A0A061GFT9.1 PF07991.10;IlvN;	up	yes
TRINITY_DN14899_c1_g1	2702	TRINITY_DN14899_c1_g1_i1	NADH dehydrogenase [ubiquinone] iron-sulfur protein 1, mitochondrial [Jatropha curcas]	-	NADH dehydrogenase [ubiquinone] iron-sulfur protein 1, mitochondrial OS=Solanum tuberosum PE=2 SV=1	GO:0005747(mitochondrial respiratory chain complex I)	COG1034(subunit g)	K03934	NADH dehydrogenase (ubiquinone) Fe-S protein 1	EC:1.6.5.3 1.6.99.3	jcu00190(Oxidative phosphorylation)	A0A067JPL6.1 PF00384.20;Molybdopterin;	no	no
TRINITY_DN10129_c0_g1	2170	TRINITY_DN10129_c0_g1_i1;TRINITY_DN10129_c0_g1_i2;TRINITY_DN10129_c0_g1_i3	dihydrolipoyl dehydrogenase 1, chloroplastic isoform X2 [Ricinus communis]	LPD1	Dihydrolipoyl dehydrogenase 1, chloroplastic OS=Arabidopsis thaliana GN=LPD1 PE=2 SV=1	GO:0004148(dihydrolipoyl dehydrogenase activity);GO:0005730(nucleolus);GO:0005739(mitochondrion);GO:0005829(cytosol);GO:0006086(acetyl-CoA biosynthetic process from pyruvate);GO:0009507(chloroplast);GO:0009570(chloroplast stroma);GO:0009941(chloroplast en	COG1249(dihydrolipoyl dehydrogenase)	K00382	dihydrolipoamide dehydrogenase	EC:1.8.1.4	rcu00010(Glycolysis / Gluconeogenesis);rcu00020(Citrate cycle (TCA cycle));rcu00620(Pyruvate metabolism);rcu00630(Glyoxylate and dicarboxylate metabolism);rcu00640(Propanoate metabolism);rcu00260(Glycine, serine and threonine metabolism);rcu00280(Valine,	A0A0D2RYW2.1 PF07992.12;Pyr_redox_2;	no	no
TRINITY_DN14899_c1_g2	1616	TRINITY_DN14899_c1_g2_i1;TRINITY_DN14899_c1_g2_i2;TRINITY_DN14899_c1_g2_i3;TRINITY_DN14899_c1_g2_i4;TRINITY_DN14899_c1_g2_i5	PREDICTED: peptidyl-prolyl cis-trans isomerase FKBP16-3, chloroplastic isoform X2 [Prunus mume]	FKBP16-3	Peptidyl-prolyl cis-trans isomerase FKBP16-3, chloroplastic OS=Arabidopsis thaliana GN=FKBP16-3 PE=1 SV=2	GO:0003755(peptidyl-prolyl cis-trans isomerase activity);GO:0005528(FK506 binding);GO:0005789(endoplasmic reticulum membrane);GO:0061077(chaperone-mediated protein folding)	COG0545(Peptidyl-prolyl cis-trans isomerase)	NA	NA	NA	NA(NA)	A0A061EIC9.1 PF00254.26;FKBP_C;	no	no
TRINITY_DN14909_c1_g1	4498	TRINITY_DN14909_c1_g1_i1;TRINITY_DN14909_c1_g1_i2;TRINITY_DN14909_c1_g1_i3;TRINITY_DN14909_c1_g1_i4;TRINITY_DN14909_c1_g1_i5;TRINITY_DN14909_c1_g1_i6;TRINITY_DN14909_c1_g1_i7;TRINITY_DN14909_c1_g1_i8;TRINITY_DN14909_c1_g1_i9	kinesin-like protein KIN-14A [Manihot esculenta]	KIN14B	Kinesin-like protein KIN-14B OS=Arabidopsis thaliana GN=KIN14B PE=1 SV=1	GO:0003777(microtubule motor activity);GO:0005871(kinesin complex);GO:0007018(microtubule-based movement);GO:0016887(ATPase activity)	COG5059(Kinesin family member)	NA	NA	NA	NA(NA)	B9SXG6.1 PF00225.21;Kinesin;	no	no
TRINITY_DN10788_c0_g1	853	TRINITY_DN10788_c0_g1_i1;TRINITY_DN10788_c0_g1_i2;TRINITY_DN10788_c0_g1_i3;TRINITY_DN10788_c0_g1_i4;TRINITY_DN10788_c0_g1_i5;TRINITY_DN10788_c0_g1_i6;TRINITY_DN10788_c0_g1_i7	hypothetical protein CUMW_005470, partial [Citrus unshiu]	RPS14C	40S ribosomal protein S14-3 OS=Arabidopsis thaliana GN=RPS14C PE=2 SV=2	GO:0000028(ribosomal small subunit assembly);GO:0000462(maturation of SSU-rRNA from tricistronic rRNA transcript (SSU-rRNA, 5.8S rRNA, LSU-rRNA));GO:0003735(structural constituent of ribosome);GO:0006412(translation);GO:0022627(cytosolic small ribosomal s	COG0100(Located on the platform of the 30S subunit, it bridges several disparate RNA helices of the 16S rRNA. Forms part of the Shine-Dalgarno cleft in the 70S ribosome (By similarity))	K02955	small subunit ribosomal protein S14e	-	thj03010(Ribosome)	Q7XSA6.2 PF00411.17;Ribosomal_S11;	no	no
TRINITY_DN14925_c0_g3	1485	TRINITY_DN14925_c0_g3_i1;TRINITY_DN14925_c0_g3_i2;TRINITY_DN14925_c0_g3_i3;TRINITY_DN14925_c0_g3_i4	porin voltage-dependent anion-selective channel protein [Passiflora edulis]	-	Mitochondrial outer membrane protein porin of 36 kDa OS=Solanum tuberosum PE=1 SV=2	GO:0005515(protein binding);GO:0005739(mitochondrion);GO:0005741(mitochondrial outer membrane);GO:0005773(vacuole);GO:0005774(vacuolar membrane);GO:0005794(Golgi apparatus);GO:0005886(plasma membrane);GO:0006820(anion transport);GO:0006952(defense respons	ENOG410ZBK1(voltage-dependent anion channel)	NA	NA	NA	NA(NA)	B9S2B6.1 PF01459.20;Porin_3;	no	no
TRINITY_DN14940_c0_g1	2006	TRINITY_DN14940_c0_g1_i1;TRINITY_DN14940_c0_g1_i10;TRINITY_DN14940_c0_g1_i2;TRINITY_DN14940_c0_g1_i3;TRINITY_DN14940_c0_g1_i4;TRINITY_DN14940_c0_g1_i5;TRINITY_DN14940_c0_g1_i6;TRINITY_DN14940_c0_g1_i7;TRINITY_DN14940_c0_g1_i8;TRINITY_DN14940_c0_g1_i9	uncharacterized protein LOC110658934 [Hevea brasiliensis]	-	-	GO:0003674(molecular_function);GO:0009507(chloroplast);GO:0009570(chloroplast stroma);GO:0009579(thylakoid);GO:0010478(chlororespiration)	ENOG4111HI9(post-illumination chlorophyll fluorescence increase)	-	-	-	-	K3ZML1.1 PF16760.3;CBM53;	no	no
TRINITY_DN10792_c0_g1	1308	TRINITY_DN10792_c0_g1_i1;TRINITY_DN10792_c0_g1_i2;TRINITY_DN10792_c0_g1_i3	methyl-CpG-binding domain-containing protein 11-like isoform X2 [Manihot esculenta]	MBD11	Methyl-CpG-binding domain-containing protein 11 OS=Arabidopsis thaliana GN=MBD11 PE=1 SV=1	GO:0003677(DNA binding);GO:0005634(nucleus);GO:0006351(transcription, DNA-templated);GO:0006355(regulation of transcription, DNA-templated);GO:0008327(methyl-CpG binding)	ENOG410YRVP(methyl-CpG binding)	-	-	-	-	W1NE73.1 PF01429.17;MBD;	no	no
TRINITY_DN14944_c0_g2	1002	TRINITY_DN14944_c0_g2_i1;TRINITY_DN14944_c0_g2_i2;TRINITY_DN14944_c0_g2_i3;TRINITY_DN14944_c0_g2_i4;TRINITY_DN14944_c0_g2_i5;TRINITY_DN14944_c0_g2_i6;TRINITY_DN14944_c0_g2_i7	miraculin-like protein, partial [Passiflora edulis]	-	-	-	-	-	-	-	-	-	no	no
TRINITY_DN14953_c0_g2	1315	TRINITY_DN14953_c0_g2_i1;TRINITY_DN14953_c0_g2_i2;TRINITY_DN14953_c0_g2_i3	copper-transporting ATPase PAA1, chloroplastic isoform X10 [Hevea brasiliensis]	PAA1	Copper-transporting ATPase PAA1, chloroplastic OS=Arabidopsis thaliana GN=PAA1 PE=2 SV=1	GO:0005783(endoplasmic reticulum);GO:0005887(integral component of plasma membrane);GO:0019829(cation-transporting ATPase activity)	COG2217(p-type ATPase)	NA	NA	NA	NA(NA)	V4S9M9.1 PF00403.24;HMA;	no	no
TRINITY_DN14957_c0_g3	2278	TRINITY_DN14957_c0_g3_i1;TRINITY_DN14957_c0_g3_i10;TRINITY_DN14957_c0_g3_i11;TRINITY_DN14957_c0_g3_i12;TRINITY_DN14957_c0_g3_i13;TRINITY_DN14957_c0_g3_i2;TRINITY_DN14957_c0_g3_i3;TRINITY_DN14957_c0_g3_i4;TRINITY_DN14957_c0_g3_i5;TRINITY_DN14957_c0_g3_i6;T	fructose-bisphosphate aldolase 1, chloroplastic [Sesamum indicum]	-	Fructose-bisphosphate aldolase 1, chloroplastic (Fragment) OS=Pisum sativum PE=1 SV=1	GO:0004332(fructose-bisphosphate aldolase activity);GO:0005737(cytoplasm)	COG3588(fructose-bisphosphate aldolase)	K01623	fructose-bisphosphate aldolase, class I	EC:4.1.2.13	sind00010(Glycolysis / Gluconeogenesis);sind00030(Pentose phosphate pathway);sind00051(Fructose and mannose metabolism);sind00710(Carbon fixation in photosynthetic organisms)	B9HFI4.1 PF00274.17;Glycolytic;	no	no
TRINITY_DN14958_c0_g11	852	TRINITY_DN14958_c0_g11_i1	17.3 kDa class I heat shock protein [Jatropha curcas]	HSP17.5-E	17.5 kDa class I heat shock protein OS=Glycine max GN=HSP17.5-E PE=3 SV=1	GO:0003674(molecular_function);GO:0005737(cytoplasm);GO:0006979(response to oxidative stress);GO:0009408(response to heat);GO:0009644(response to high light intensity);GO:0042542(response to hydrogen peroxide)	COG0071(response to heat)	K13993	HSP20 family protein	-	jcu04141(Protein processing in endoplasmic reticulum)	C6SXG1.1 PF00011.19;HSP20;	no	no
TRINITY_DN14962_c0_g2	2153	TRINITY_DN14962_c0_g2_i1;TRINITY_DN14962_c0_g2_i10;TRINITY_DN14962_c0_g2_i11;TRINITY_DN14962_c0_g2_i12;TRINITY_DN14962_c0_g2_i13;TRINITY_DN14962_c0_g2_i14;TRINITY_DN14962_c0_g2_i15;TRINITY_DN14962_c0_g2_i16;TRINITY_DN14962_c0_g2_i17;TRINITY_DN14962_c0_g2_	aldehyde dehydrogenase family 2 member C4 [Populus trichocarpa]	ALDH2C4	Aldehyde dehydrogenase family 2 member C4 OS=Arabidopsis thaliana GN=ALDH2C4 PE=1 SV=2	GO:0004029(aldehyde dehydrogenase (NAD) activity)	COG1012(Dehydrogenase)	K12355	coniferyl-aldehyde dehydrogenase	EC:1.2.1.68	rcu00940(Phenylpropanoid biosynthesis)	B9ILK3.1 PF00171.20;Aldedh;	no	no
TRINITY_DN14975_c0_g2	1800	TRINITY_DN14975_c0_g2_i1;TRINITY_DN14975_c0_g2_i10;TRINITY_DN14975_c0_g2_i11;TRINITY_DN14975_c0_g2_i12;TRINITY_DN14975_c0_g2_i13;TRINITY_DN14975_c0_g2_i14;TRINITY_DN14975_c0_g2_i2;TRINITY_DN14975_c0_g2_i3;TRINITY_DN14975_c0_g2_i4;TRINITY_DN14975_c0_g2_i5;	PREDICTED: malate dehydrogenase [Populus euphratica]	MD1	Malate dehydrogenase OS=Nicotiana tabacum GN=MD1 PE=1 SV=1	GO:0005515(protein binding);GO:0005737(cytoplasm);GO:0005829(cytosol);GO:0005886(plasma membrane);GO:0005975(carbohydrate metabolic process);GO:0006099(tricarboxylic acid cycle);GO:0006107(oxaloacetate metabolic process);GO:0006108(malate metabolic proces	COG0039(Catalyzes the reversible oxidation of malate to oxaloacetate (By similarity))	K00025	malate dehydrogenase	EC:1.1.1.37	jcu00020(Citrate cycle (TCA cycle));jcu00620(Pyruvate metabolism);jcu00630(Glyoxylate and dicarboxylate metabolism);jcu00710(Carbon fixation in photosynthetic organisms);jcu00270(Cysteine and methionine metabolism)	A0A061EMF9.1 PF02866.16;Ldh_1_C;	no	no
TRINITY_DN14976_c0_g2	1138	TRINITY_DN14976_c0_g2_i1;TRINITY_DN14976_c0_g2_i2;TRINITY_DN14976_c0_g2_i3;TRINITY_DN14976_c0_g2_i4;TRINITY_DN14976_c0_g2_i5;TRINITY_DN14976_c0_g2_i6	Actin 7 isoform 1 [Theobroma cacao]	ACT7	Actin-7 OS=Arabidopsis thaliana GN=ACT7 PE=1 SV=1	GO:0005200(structural constituent of cytoskeleton);GO:0005515(protein binding);GO:0005524(ATP binding);GO:0005618(cell wall);GO:0005730(nucleolus);GO:0005737(cytoplasm);GO:0005739(mitochondrion);GO:0005829(cytosol);GO:0005856(cytoskeleton);GO:0005886(plas	COG5277(Actin-related protein)	NA	NA	NA	NA(NA)	A0A061FNF4.1 PF00022.17;Actin;	no	no
TRINITY_DN14982_c0_g2	2342	TRINITY_DN14982_c0_g2_i1;TRINITY_DN14982_c0_g2_i2	SNW/SKI-interacting protein-like [Manihot esculenta]	SKIP	SNW/SKI-interacting protein OS=Arabidopsis thaliana GN=SKIP PE=1 SV=1	GO:0000350(generation of catalytic spliceosome for second transesterification step);GO:0000398(mRNA splicing, via spliceosome);GO:0003712(transcription cofactor activity);GO:0005515(protein binding);GO:0005634(nucleus);GO:0005730(nucleolus);GO:0006351(tra	ENOG410XQGT(SNW domain containing 1)	K06063	SNW domain-containing protein 1	-	rcu03040(Spliceosome)	A0A022Q0F6.1 PF02731.13;SKIP_SNW;	no	no
TRINITY_DN14996_c0_g1	2649	TRINITY_DN14996_c0_g1_i1;TRINITY_DN14996_c0_g1_i2;TRINITY_DN14996_c0_g1_i3;TRINITY_DN14996_c0_g1_i4;TRINITY_DN14996_c0_g1_i5;TRINITY_DN14996_c0_g1_i6;TRINITY_DN14996_c0_g1_i7	polyadenylate-binding protein 8-like [Manihot esculenta]	PAB8	Polyadenylate-binding protein 8 OS=Arabidopsis thaliana GN=PAB8 PE=1 SV=1	GO:0003723(RNA binding);GO:0003729(mRNA binding);GO:0003743(translation initiation factor activity);GO:0005515(protein binding);GO:0005634(nucleus);GO:0005737(cytoplasm);GO:0005829(cytosol);GO:0006417(regulation of translation);GO:0016032(viral process);G	ENOG410XR5X(poly(A) binding protein, cytoplasmic)	K13126	polyadenylate-binding protein	-	rcu03013(RNA transport);rcu03015(mRNA surveillance pathway);rcu03018(RNA degradation)	B9RYE9.1 PF00076.20;RRM_1;	no	no
TRINITY_DN15000_c1_g1	2925	TRINITY_DN15000_c1_g1_i1;TRINITY_DN15000_c1_g1_i10;TRINITY_DN15000_c1_g1_i11;TRINITY_DN15000_c1_g1_i12;TRINITY_DN15000_c1_g1_i13;TRINITY_DN15000_c1_g1_i14;TRINITY_DN15000_c1_g1_i2;TRINITY_DN15000_c1_g1_i3;TRINITY_DN15000_c1_g1_i4;TRINITY_DN15000_c1_g1_i5;	ribulose bisphosphate carboxylase/oxygenase activase, chloroplastic isoform X1 [Jatropha curcas]	RCA1	Ribulose bisphosphate carboxylase/oxygenase activase, chloroplastic OS=Zea mays GN=RCA1 PE=2 SV=3	GO:0005524(ATP binding);GO:0009507(chloroplast);GO:0009535(chloroplast thylakoid membrane);GO:0016787(hydrolase activity);GO:0016887(ATPase activity)	COG1222(26S protease regulatory subunit)	K02960	small subunit ribosomal protein S16e	-	cpap03010(Ribosome)	A0A0D2QGD9.1 PF00004.27;AAA;	no	no
TRINITY_DN15005_c0_g3	2134	TRINITY_DN15005_c0_g3_i1;TRINITY_DN15005_c0_g3_i2;TRINITY_DN15005_c0_g3_i3	plant UBX domain-containing protein 11-like isoform X2 [Hevea brasiliensis]	PUX11	Plant UBX domain-containing protein 11 OS=Arabidopsis thaliana GN=PUX11 PE=1 SV=2	GO:0003674(molecular_function);GO:0005575(cellular_component);GO:0008150(biological_process)	ENOG410ZR21(UBX domain protein 4)	-	-	-	-	B9HHD9.1 PF00789.18;UBX;	up	yes
TRINITY_DN15010_c1_g5	998	TRINITY_DN15010_c1_g5_i1;TRINITY_DN15010_c1_g5_i2	EG45-like domain containing protein [Populus trichocarpa]	EGC2	EG45-like domain containing protein 2 OS=Arabidopsis thaliana GN=EGC2 PE=2 SV=2	GO:0005576(extracellular region);GO:0005618(cell wall);GO:0009627(systemic acquired resistance);GO:0010230(alternative respiration);GO:0048046(apoplast)	ENOG41123UD(EG45-like domain containing)	NA	NA	NA	NA(NA)	B9IM88.2 PF03330.16;DPBB_1;	no	no
TRINITY_DN15014_c0_g3	2648	TRINITY_DN15014_c0_g3_i1;TRINITY_DN15014_c0_g3_i10;TRINITY_DN15014_c0_g3_i11;TRINITY_DN15014_c0_g3_i12;TRINITY_DN15014_c0_g3_i13;TRINITY_DN15014_c0_g3_i2;TRINITY_DN15014_c0_g3_i3;TRINITY_DN15014_c0_g3_i4;TRINITY_DN15014_c0_g3_i5;TRINITY_DN15014_c0_g3_i6;T	uncharacterized protein LOC105630103 isoform X2 [Jatropha curcas]	-	-	GO:0005737(cytoplasm);GO:0016310(phosphorylation);GO:0016773(phosphotransferase activity, alcohol group as acceptor)	COG1070(Carbohydrate kinase)	-	-	-	-	M5VZ05.1 PF02782.14;FGGY_C;	up	yes
TRINITY_DN15016_c0_g1	2043	TRINITY_DN15016_c0_g1_i1;TRINITY_DN15016_c0_g1_i10;TRINITY_DN15016_c0_g1_i11;TRINITY_DN15016_c0_g1_i12;TRINITY_DN15016_c0_g1_i13;TRINITY_DN15016_c0_g1_i14;TRINITY_DN15016_c0_g1_i2;TRINITY_DN15016_c0_g1_i3;TRINITY_DN15016_c0_g1_i4;TRINITY_DN15016_c0_g1_i5;	4-hydroxy-3-methylbut-2-enyl diphosphate reductase, chloroplastic [Populus trichocarpa]	ISPH	4-hydroxy-3-methylbut-2-enyl diphosphate reductase, chloroplastic OS=Arabidopsis thaliana GN=ISPH PE=2 SV=1	GO:0009507(chloroplast);GO:0009570(chloroplast stroma);GO:0019288(isopentenyl diphosphate biosynthetic process, methylerythritol 4-phosphate pathway);GO:0046429(4-hydroxy-3-methylbut-2-en-1-yl diphosphate synthase activity);GO:0046677(response to antibiot	COG0761(Converts 1-hydroxy-2-methyl-2-(E)-butenyl 4-diphosphate into isopentenyl diphosphate (IPP) and dimethylallyl diphosphate (DMAPP) (By similarity))	K03527	4-hydroxy-3-methylbut-2-en-1-yl diphosphate reductase	EC:1.17.7.4	soe00900(Terpenoid backbone biosynthesis)	A0A059AMV0.1 PF02401.16;LYTB;	no	no
TRINITY_DN10799_c0_g5	1315	TRINITY_DN10799_c0_g5_i1	heme-binding-like protein At3g10130, chloroplastic [Manihot esculenta]	At3g10130	Heme-binding-like protein At3g10130, chloroplastic OS=Arabidopsis thaliana GN=At3g10130 PE=2 SV=1	GO:0008150(biological_process);GO:0009507(chloroplast);GO:0009535(chloroplast thylakoid membrane);GO:0010287(plastoglobule)	ENOG4111QRP(SOUL heme-binding protein)	-	-	-	-	A0A067KQQ0.1 PF04832.10;SOUL;	no	no
TRINITY_DN15020_c1_g2	817	TRINITY_DN15020_c1_g2_i1;TRINITY_DN15020_c1_g2_i2	Natterin-3 like [Actinidia chinensis var. chinensis]	-	-	-	ENOG41122DF(NA)	-	-	-	-	F6HZZ6.1 PF07468.9;Agglutinin;	no	no
TRINITY_DN15036_c0_g3	2754	TRINITY_DN15036_c0_g3_i1;TRINITY_DN15036_c0_g3_i2	PREDICTED: neurofilament medium polypeptide-like [Populus euphratica]	-	-	-	ENOG410Z6K9(NA)	-	-	-	-	-	no	no
TRINITY_DN15039_c0_g6	1374	TRINITY_DN15039_c0_g6_i1	uncharacterized protein LOC110636332 isoform X2 [Hevea brasiliensis]	-	-	GO:0005507(copper ion binding);GO:0005634(nucleus);GO:0008150(biological_process)	ENOG410YS9I(NA)	-	-	-	-	-	no	no
TRINITY_DN15044_c2_g2	3551	TRINITY_DN15044_c2_g2_i1;TRINITY_DN15044_c2_g2_i2;TRINITY_DN15044_c2_g2_i3;TRINITY_DN15044_c2_g2_i4;TRINITY_DN15044_c2_g2_i5;TRINITY_DN15044_c2_g2_i6	eukaryotic translation initiation factor 3 subunit A-like [Hevea brasiliensis]	TIF3A1	Eukaryotic translation initiation factor 3 subunit A OS=Arabidopsis thaliana GN=TIF3A1 PE=1 SV=1	GO:0001732(formation of cytoplasmic translation initiation complex);GO:0002188(translation reinitiation);GO:0003729(mRNA binding);GO:0003743(translation initiation factor activity);GO:0005515(protein binding);GO:0005737(cytoplasm);GO:0005829(cytosol);GO:0	ENOG410XQ37(Component of the eukaryotic translation initiation factor 3 (eIF-3) complex, which is involved in protein synthesis and, together with other initiation factors, stimulates binding of mRNA and methionyl-tRNAi to the 40S ribosome (By similarity)	K03254	translation initiation factor 3 subunit A	-	hbr03013(RNA transport)	A0A061F4H5.1 PF01399.25;PCI;	no	no
TRINITY_DN15048_c0_g2	2614	TRINITY_DN15048_c0_g2_i1;TRINITY_DN15048_c0_g2_i2	ATP-dependent zinc metalloprotease FTSH, chloroplastic [Jatropha curcas]	FTSH	ATP-dependent zinc metalloprotease FTSH, chloroplastic OS=Nicotiana tabacum GN=FTSH PE=2 SV=2	GO:0004176(ATP-dependent peptidase activity);GO:0005739(mitochondrion);GO:0006508(proteolysis);GO:0008237(metallopeptidase activity);GO:0009535(chloroplast thylakoid membrane);GO:0009941(chloroplast envelope);GO:0010027(thylakoid membrane organization);GO	COG0465(Acts as a processive, ATP-dependent zinc metallopeptidase for both cytoplasmic and membrane proteins. Plays a role in the quality control of integral membrane proteins (By similarity))	NA	NA	NA	NA(NA)	K4BVV2.1 PF01434.16;Peptidase_M41;	no	no
TRINITY_DN15053_c0_g4	1261	TRINITY_DN15053_c0_g4_i1	hypothetical protein Ahy_A07g036384 isoform A [Arachis hypogaea]	ANN1	Annexin D1 OS=Arabidopsis thaliana GN=ANN1 PE=1 SV=1	GO:0004601(peroxidase activity);GO:0005507(copper ion binding);GO:0005509(calcium ion binding);GO:0005524(ATP binding);GO:0005544(calcium-dependent phospholipid binding);GO:0005618(cell wall);GO:0005634(nucleus);GO:0005739(mitochondrion);GO:0005773(vacuol	ENOG410XPUN(annexin A7)	NA	NA	NA	NA(NA)	A9PA39.1 PF00191.18;Annexin;	no	no
TRINITY_DN15057_c0_g1	1811	TRINITY_DN15057_c0_g1_i1;TRINITY_DN15057_c0_g1_i10;TRINITY_DN15057_c0_g1_i11;TRINITY_DN15057_c0_g1_i12;TRINITY_DN15057_c0_g1_i13;TRINITY_DN15057_c0_g1_i14;TRINITY_DN15057_c0_g1_i15;TRINITY_DN15057_c0_g1_i16;TRINITY_DN15057_c0_g1_i17;TRINITY_DN15057_c0_g1_	hypothetical protein GOBAR_DD29270 [Gossypium barbadense]	DNAJ1	DnaJ protein homolog OS=Cucumis sativus GN=DNAJ1 PE=2 SV=1	GO:0005634(nucleus)	COG0484(ATP binding to DnaK triggers the release of the substrate protein, thus completing the reaction cycle. Several rounds of ATP-dependent interactions between DnaJ, DnaK and GrpE are required for fully efficient folding. Also involved, together with	K09503	DnaJ homolog subfamily A member 2	-	cpap04141(Protein processing in endoplasmic reticulum)	A0A0J8E591.1 PF01556.16;DnaJ_C;	no	no
TRINITY_DN15060_c0_g2	1476	TRINITY_DN15060_c0_g2_i1;TRINITY_DN15060_c0_g2_i10;TRINITY_DN15060_c0_g2_i11;TRINITY_DN15060_c0_g2_i12;TRINITY_DN15060_c0_g2_i2;TRINITY_DN15060_c0_g2_i3;TRINITY_DN15060_c0_g2_i4;TRINITY_DN15060_c0_g2_i5;TRINITY_DN15060_c0_g2_i6;TRINITY_DN15060_c0_g2_i7;TR	bifunctional nitrilase/nitrile hydratase NIT4A [Populus trichocarpa]	NIT4B	Bifunctional nitrilase/nitrile hydratase NIT4B OS=Nicotiana tabacum GN=NIT4B PE=2 SV=1	GO:0019500(cyanide catabolic process);GO:0047427(cyanoalanine nitrilase activity);GO:0047558(3-cyanoalanine hydratase activity);GO:0051410(detoxification of nitrogen compound)	COG0388(nitrilase cyanide hydratase and apolipoprotein n-acyltransferase)	K13035	beta-cyano-L-alanine hydratase/nitrilase	EC:3.5.5.4 4.2.1.65	tcc00460(Cyanoamino acid metabolism)	A0A022QHH3.1 PF00795.20;CN_hydrolase;	up	yes
TRINITY_DN15062_c1_g4	2376	TRINITY_DN15062_c1_g4_i1;TRINITY_DN15062_c1_g4_i2	heterogeneous nuclear ribonucleoprotein 1 [Manihot esculenta]	RNP1	Heterogeneous nuclear ribonucleoprotein 1 OS=Arabidopsis thaliana GN=RNP1 PE=1 SV=1	GO:0003723(RNA binding);GO:0003729(mRNA binding);GO:0005576(extracellular region)	ENOG410YA8Z(Rna-binding protein)	K14411	RNA-binding protein Musashi	-	jcu03015(mRNA surveillance pathway)	A0A067KWB0.1 PF00076.20;RRM_1;	no	no
TRINITY_DN15068_c0_g2	2502	TRINITY_DN15068_c0_g2_i1;TRINITY_DN15068_c0_g2_i2;TRINITY_DN15068_c0_g2_i3;TRINITY_DN15068_c0_g2_i4;TRINITY_DN15068_c0_g2_i5;TRINITY_DN15068_c0_g2_i6	peptidyl-prolyl cis-trans isomerase CYP38, chloroplastic [Manihot esculenta]	CYP38	Peptidyl-prolyl cis-trans isomerase CYP38, chloroplastic OS=Arabidopsis thaliana GN=CYP38 PE=1 SV=1	GO:0003755(peptidyl-prolyl cis-trans isomerase activity)	COG0652(peptidyl-prolyl cis-trans isomerase activity)	-	-	-	-	U5GVV7.1 PF00160.19;Pro_isomerase;	no	no
TRINITY_DN15071_c1_g1	3188	TRINITY_DN15071_c1_g1_i1;TRINITY_DN15071_c1_g1_i2;TRINITY_DN15071_c1_g1_i3;TRINITY_DN15071_c1_g1_i4;TRINITY_DN15071_c1_g1_i5	chaperone protein ClpC, chloroplastic [Manihot esculenta]	CD4B	ATP-dependent Clp protease ATP-binding subunit ClpA homolog CD4B, chloroplastic OS=Solanum lycopersicum GN=CD4B PE=3 SV=1	GO:0004176(ATP-dependent peptidase activity);GO:0005515(protein binding);GO:0005524(ATP binding);GO:0005618(cell wall);GO:0005739(mitochondrion);GO:0005829(cytosol);GO:0009507(chloroplast);GO:0009532(plastid stroma);GO:0009535(chloroplast thylakoid membra	COG0542(ATP-dependent CLP protease ATP-binding subunit)	NA	NA	NA	NA(NA)	I1IA07.1 PF07724.12;AAA_2;	no	no
TRINITY_DN15074_c0_g2	2815	TRINITY_DN15074_c0_g2_i1	PREDICTED: elongation factor G-2, chloroplastic [Theobroma cacao]	fusA2	Elongation factor G-2, chloroplastic OS=Glycine max GN=fusA2 PE=3 SV=1	GO:0003746(translation elongation factor activity);GO:0003924(GTPase activity);GO:0005622(intracellular);GO:0032790(ribosome disassembly)	COG0480(Catalyzes the GTP-dependent ribosomal translocation step during translation elongation. During this step, the ribosome changes from the pre-translocational (PRE) to the post- translocational (POST) state as the newly formed A-site-bound peptidyl-t	NA	NA	NA	NA(NA)	W9R236.1 PF00009.25;GTP_EFTU;	down	yes
TRINITY_DN15083_c0_g1	1534	TRINITY_DN15083_c0_g1_i1;TRINITY_DN15083_c0_g1_i2;TRINITY_DN15083_c0_g1_i3;TRINITY_DN15083_c0_g1_i4;TRINITY_DN15083_c0_g1_i5	uncharacterized protein LOC110656952 [Hevea brasiliensis]	-	-	GO:0003674(molecular_function);GO:0005739(mitochondrion);GO:0005777(peroxisome);GO:0010150(leaf senescence);GO:0016021(integral component of membrane)	ENOG41125P8(B12d protein)	-	-	-	-	K4B790.1 PF06522.9;B12D;	no	no
TRINITY_DN15092_c0_g1	2671	TRINITY_DN15092_c0_g1_i1;TRINITY_DN15092_c0_g1_i10;TRINITY_DN15092_c0_g1_i11;TRINITY_DN15092_c0_g1_i12;TRINITY_DN15092_c0_g1_i13;TRINITY_DN15092_c0_g1_i14;TRINITY_DN15092_c0_g1_i15;TRINITY_DN15092_c0_g1_i2;TRINITY_DN15092_c0_g1_i3;TRINITY_DN15092_c0_g1_i4	14-3-3 family protein [Dimocarpus longan]	GBF	14-3-3-like protein OS=Mesembryanthemum crystallinum GN=GBF PE=2 SV=1	GO:0005515(protein binding);GO:0005524(ATP binding);GO:0005618(cell wall);GO:0005634(nucleus);GO:0005737(cytoplasm);GO:0005739(mitochondrion);GO:0005773(vacuole);GO:0005794(Golgi apparatus);GO:0005829(cytosol);GO:0005886(plasma membrane);GO:0006995(cellul	COG5040(Tyrosine 3-monooxygenase tryptophan 5-monooxygenase activation protein)	NA	NA	NA	NA(NA)	A0A059ADY5.1 PF00244.18;14-3-3;	no	no
TRINITY_DN10806_c0_g2	1748	TRINITY_DN10806_c0_g2_i1;TRINITY_DN10806_c0_g2_i2	cAMP-regulated phosphoprotein 21-like [Hevea brasiliensis]	-	-	GO:0003674(molecular_function);GO:0005634(nucleus);GO:0008150(biological_process)	ENOG410YHYN(PB1)	NA	NA	NA	NA(NA)	A0A067KI88.1 PF00564.22;PB1;	no	no
TRINITY_DN15100_c0_g2	1636	TRINITY_DN15100_c0_g2_i1;TRINITY_DN15100_c0_g2_i2;TRINITY_DN15100_c0_g2_i3;TRINITY_DN15100_c0_g2_i4;TRINITY_DN15100_c0_g2_i5	hypothetical protein POPTR_017G087200 [Populus trichocarpa]	At5g39570	Uncharacterized protein At5g39570 OS=Arabidopsis thaliana GN=At5g39570 PE=1 SV=1	GO:0003674(molecular_function);GO:0005886(plasma membrane);GO:0008150(biological_process)	ENOG410YMJK(NA)	NA	NA	NA	NA(NA)	-	no	no
TRINITY_DN15109_c0_g1	1473	TRINITY_DN15109_c0_g1_i1;TRINITY_DN15109_c0_g1_i2;TRINITY_DN15109_c0_g1_i3;TRINITY_DN15109_c0_g1_i4	plant UBX domain-containing protein 4-like [Hevea brasiliensis]	PUX4	Plant UBX domain-containing protein 4 OS=Arabidopsis thaliana GN=PUX4 PE=1 SV=1	GO:0005634(nucleus);GO:0005829(cytosol);GO:0007030(Golgi organization);GO:0031468(nuclear envelope reassembly);GO:0043130(ubiquitin binding);GO:0043161(proteasome-mediated ubiquitin-dependent protein catabolic process);GO:0061025(membrane fusion)	ENOG410YGXU(UBX domain protein)	K14012	UBX domain-containing protein 1	-	hbr04141(Protein processing in endoplasmic reticulum)	B9RXF0.1 PF08059.11;SEP;	no	no
TRINITY_DN15112_c1_g3	1237	TRINITY_DN15112_c1_g3_i1;TRINITY_DN15112_c1_g3_i2	translation initiation factor IF3-4, chloroplastic [Ricinus communis]	infC	Translation initiation factor IF-3 OS=Caldanaerobacter subterraneus subsp. tengcongensis (strain DSM 15242 / JCM 11007 / NBRC 100824 / MB4) GN=infC PE=3 SV=1	GO:0003743(translation initiation factor activity);GO:0006413(translational initiation);GO:0009507(chloroplast);GO:0009658(chloroplast organization);GO:0032790(ribosome disassembly);GO:0043022(ribosome binding);GO:0048366(leaf development)	COG0290(IF-3 binds to the 30S ribosomal subunit and shifts the equilibrum between 70S ribosomes and their 50S and 30S subunits in favor of the free subunits, thus enhancing the availability of 30S subunits on which protein synthesis initiation begins (By	NA	NA	NA	NA(NA)	B9IMB4.1 PF00707.20;IF3_C;	no	no
TRINITY_DN15124_c1_g5	2365	TRINITY_DN15124_c1_g5_i1;TRINITY_DN15124_c1_g5_i2	protein decapping 5-like [Manihot esculenta]	DCP5	Protein decapping 5 OS=Arabidopsis thaliana GN=DCP5 PE=1 SV=1	GO:0000932(P-body);GO:0003729(mRNA binding);GO:0005515(protein binding);GO:0005829(cytosol);GO:0006397(mRNA processing);GO:0010606(positive regulation of cytoplasmic mRNA processing body assembly);GO:0017148(negative regulation of translation);GO:0031087(	ENOG41122RA(LSM14A, SCD6 homolog A (S. cerevisiae))	NA	NA	NA	NA(NA)	I1JDY6.2 PF14438.4;SM-ATX;	no	no
TRINITY_DN15133_c0_g1	1909	TRINITY_DN15133_c0_g1_i1;TRINITY_DN15133_c0_g1_i2;TRINITY_DN15133_c0_g1_i3;TRINITY_DN15133_c0_g1_i4;TRINITY_DN15133_c0_g1_i5;TRINITY_DN15133_c0_g1_i6	beta-D-xylosidase 1 [Ziziphus jujuba]	BXL1	Beta-D-xylosidase 1 OS=Arabidopsis thaliana GN=BXL1 PE=1 SV=1	GO:0009044(xylan 1,4-beta-xylosidase activity);GO:0009505(plant-type cell wall);GO:0031222(arabinan catabolic process);GO:0045493(xylan catabolic process);GO:0046556(alpha-L-arabinofuranosidase activity)	COG1472(hydrolase family 3)	K15920	xylan 1,4-beta-xylosidase	EC:3.2.1.37	cic00520(Amino sugar and nucleotide sugar metabolism)	B9HWX2.1 PF00933.19;Glyco_hydro_3;	no	no
TRINITY_DN15133_c0_g4	3050	TRINITY_DN15133_c0_g4_i1	probable beta-D-xylosidase 7 [Populus trichocarpa]	BXL7	Probable beta-D-xylosidase 7 OS=Arabidopsis thaliana GN=BXL7 PE=2 SV=2	GO:0009044(xylan 1,4-beta-xylosidase activity);GO:0009505(plant-type cell wall);GO:0031222(arabinan catabolic process);GO:0045493(xylan catabolic process);GO:0046556(alpha-L-arabinofuranosidase activity)	COG1472(hydrolase family 3)	K15920	xylan 1,4-beta-xylosidase	EC:3.2.1.37	rcu00520(Amino sugar and nucleotide sugar metabolism)	A0A067J914.1 PF00933.19;Glyco_hydro_3;	no	no
TRINITY_DN15139_c0_g1	1142	TRINITY_DN15139_c0_g1_i1;TRINITY_DN15139_c0_g1_i2	PREDICTED: coiled-coil domain-containing protein 124 [Vitis vinifera]	CCDC124	Coiled-coil domain-containing protein 124 OS=Bos taurus GN=CCDC124 PE=2 SV=1	GO:0003674(molecular_function);GO:0005737(cytoplasm);GO:0008150(biological_process)	ENOG410ZIM9(Coiled-coil domain-containing protein)	-	-	-	-	A0A061DXV8.1 PF06244.10;DUF1014;	up	yes
TRINITY_DN15145_c1_g5	6078	TRINITY_DN15145_c1_g5_i1;TRINITY_DN15145_c1_g5_i2	eukaryotic translation initiation factor 4G [Jatropha curcas]	EIF4G	Eukaryotic translation initiation factor 4G OS=Arabidopsis thaliana GN=EIF4G PE=1 SV=2	GO:0003729(mRNA binding);GO:0003743(translation initiation factor activity);GO:0005576(extracellular region);GO:0005737(cytoplasm);GO:0006413(translational initiation);GO:0006417(regulation of translation);GO:0009615(response to virus);GO:0009737(response	ENOG410XS4P(Eukaryotic translation initiation factor 4 gamma)	K03260	translation initiation factor 4G	-	jcu03013(RNA transport)	U5FS09.1 PF02854.17;MIF4G;	no	no
TRINITY_DN15161_c0_g2	2254	TRINITY_DN15161_c0_g2_i1;TRINITY_DN15161_c0_g2_i2;TRINITY_DN15161_c0_g2_i3;TRINITY_DN15161_c0_g2_i4;TRINITY_DN15161_c0_g2_i5	PREDICTED: leucine aminopeptidase 1-like [Populus euphratica]	Os02g0794700	Leucine aminopeptidase 2, chloroplastic OS=Oryza sativa subsp. japonica GN=Os02g0794700 PE=2 SV=1	GO:0004177(aminopeptidase activity);GO:0005773(vacuole);GO:0005829(cytosol);GO:0006508(proteolysis);GO:0008235(metalloexopeptidase activity);GO:0009507(chloroplast);GO:0009570(chloroplast stroma);GO:0010150(leaf senescence);GO:0030145(manganese ion bindin	COG0260(Presumably involved in the processing and regular turnover of intracellular proteins. Catalyzes the removal of unsubstituted N-terminal amino acids from various peptides (By similarity))	K01255	leucyl aminopeptidase	EC:3.4.11.1	hbr00480(Glutathione metabolism)	A0A059CLV5.1 PF00883.19;Peptidase_M17;	no	no
TRINITY_DN15161_c0_g5	703	TRINITY_DN15161_c0_g5_i1	leucine aminopeptidase 1-like [Hevea brasiliensis]	LAP2	Leucine aminopeptidase 2, chloroplastic OS=Arabidopsis thaliana GN=LAP2 PE=2 SV=2	GO:0004177(aminopeptidase activity);GO:0005773(vacuole);GO:0005829(cytosol);GO:0006508(proteolysis);GO:0008235(metalloexopeptidase activity);GO:0009507(chloroplast);GO:0009570(chloroplast stroma);GO:0010150(leaf senescence);GO:0030145(manganese ion bindin	COG0260(Presumably involved in the processing and regular turnover of intracellular proteins. Catalyzes the removal of unsubstituted N-terminal amino acids from various peptides (By similarity))	K01255	leucyl aminopeptidase	EC:3.4.11.1	hbr00480(Glutathione metabolism)	A0A067L3M2.1 PF02789.15;Peptidase_M17_N;	no	no
TRINITY_DN10812_c0_g7	1005	TRINITY_DN10812_c0_g7_i1;TRINITY_DN10812_c0_g7_i2	uncharacterized protein LOC100778548 [Glycine max]	RPL23AA	60S ribosomal protein L23a-1 OS=Arabidopsis thaliana GN=RPL23AA PE=2 SV=2	GO:0000027(ribosomal large subunit assembly);GO:0003735(structural constituent of ribosome);GO:0006412(translation);GO:0022625(cytosolic large ribosomal subunit)	COG0089(One of the early assembly proteins it binds 23S rRNA. One of the proteins that surrounds the polypeptide exit tunnel on the outside of the ribosome. Forms the main docking site for trigger factor binding to the ribosome (By similarity))	K02893	large subunit ribosomal protein L23Ae	-	gmx03010(Ribosome)	W1NKZ6.1 PF00276.18;Ribosomal_L23;	no	no
TRINITY_DN15176_c0_g2	1336	TRINITY_DN15176_c0_g2_i1;TRINITY_DN15176_c0_g2_i10;TRINITY_DN15176_c0_g2_i11;TRINITY_DN15176_c0_g2_i12;TRINITY_DN15176_c0_g2_i2;TRINITY_DN15176_c0_g2_i3;TRINITY_DN15176_c0_g2_i4;TRINITY_DN15176_c0_g2_i5;TRINITY_DN15176_c0_g2_i6;TRINITY_DN15176_c0_g2_i7;TR	Cyclophilin-type peptidyl-prolyl cis-trans isomerase [Trema orientale]	CYP19-4	Peptidyl-prolyl cis-trans isomerase CYP19-4 OS=Arabidopsis thaliana GN=CYP19-4 PE=1 SV=2	GO:0003755(peptidyl-prolyl cis-trans isomerase activity)	COG0652(peptidyl-prolyl cis-trans isomerase activity)	NA	NA	NA	NA(NA)	A0A0K9PDW5.1 PF00160.19;Pro_isomerase;	no	no
TRINITY_DN15184_c0_g4	1036	TRINITY_DN15184_c0_g4_i1	NAD(P)H-quinone oxidoreductase subunit S, chloroplastic [Citrus sinensis]	ndhS	NAD(P)H-quinone oxidoreductase subunit S, chloroplastic OS=Arabidopsis thaliana GN=ndhS PE=1 SV=1	GO:0009507(chloroplast);GO:0009534(chloroplast thylakoid);GO:0009535(chloroplast thylakoid membrane);GO:0009767(photosynthetic electron transport chain);GO:0010598(NAD(P)H dehydrogenase complex (plastoquinone));GO:0016491(oxidoreductase activity);GO:00480	ENOG41129S2(Protein of unknown function (DUF3252))	K12261	2-hydroxyacyl-CoA lyase 1	EC:4.1.-.-	obr04146(Peroxisome)	A0A0J8CIK5.1 PF11623.6;DUF3252;	no	no
TRINITY_DN15189_c0_g8	1545	TRINITY_DN15189_c0_g8_i1;TRINITY_DN15189_c0_g8_i2	PREDICTED: porphobilinogen deaminase, chloroplastic-like [Populus euphratica]	HEMC	Porphobilinogen deaminase, chloroplastic OS=Pisum sativum GN=HEMC PE=1 SV=1	GO:0004418(hydroxymethylbilane synthase activity);GO:0005515(protein binding);GO:0006779(porphyrin-containing compound biosynthetic process);GO:0006782(protoporphyrinogen IX biosynthetic process);GO:0006783(heme biosynthetic process);GO:0009507(chloroplas	COG0181(Tetrapolymerization of the monopyrrole PBG into the hydroxymethylbilane pre-uroporphyrinogen in several discrete steps (By similarity))	K01749	hydroxymethylbilane synthase	EC:2.5.1.61	jcu00860(Porphyrin and chlorophyll metabolism)	B9S2Z0.1 PF01379.18;Porphobil_deam;	no	no
TRINITY_DN15193_c0_g2	2024	TRINITY_DN15193_c0_g2_i1;TRINITY_DN15193_c0_g2_i10;TRINITY_DN15193_c0_g2_i11;TRINITY_DN15193_c0_g2_i12;TRINITY_DN15193_c0_g2_i13;TRINITY_DN15193_c0_g2_i14;TRINITY_DN15193_c0_g2_i15;TRINITY_DN15193_c0_g2_i2;TRINITY_DN15193_c0_g2_i3;TRINITY_DN15193_c0_g2_i4	PREDICTED: glyceraldehyde-3-phosphate dehydrogenase B, chloroplastic isoform X1 [Populus euphratica]	GAPB	Glyceraldehyde-3-phosphate dehydrogenase B, chloroplastic OS=Pisum sativum GN=GAPB PE=2 SV=2	GO:0004365(glyceraldehyde-3-phosphate dehydrogenase (NAD+) (phosphorylating) activity);GO:0005829(cytosol);GO:0006006(glucose metabolic process);GO:0006096(glycolytic process);GO:0009409(response to cold);GO:0009416(response to light stimulus);GO:0009507(	COG0057(glyceraldehyde3phosphate dehydrogenase)	K05298	glyceraldehyde-3-phosphate dehydrogenase (NADP+) (phosphorylating)	EC:1.2.1.13	rcu00710(Carbon fixation in photosynthetic organisms)	C6T9R8.1 PF02800.18;Gp_dh_C;	no	no
TRINITY_DN15196_c0_g3	1684	TRINITY_DN15196_c0_g3_i1;TRINITY_DN15196_c0_g3_i2;TRINITY_DN15196_c0_g3_i3;TRINITY_DN15196_c0_g3_i4;TRINITY_DN15196_c0_g3_i5;TRINITY_DN15196_c0_g3_i6	L-ascorbate peroxidase, cytosolic-like isoform X1 [Hevea brasiliensis]	APX1	L-ascorbate peroxidase, cytosolic OS=Pisum sativum GN=APX1 PE=1 SV=2	GO:0000302(response to reactive oxygen species);GO:0004130(cytochrome-c peroxidase activity);GO:0004601(peroxidase activity);GO:0005618(cell wall);GO:0005737(cytoplasm);GO:0005794(Golgi apparatus);GO:0005829(cytosol);GO:0005886(plasma membrane);GO:0006979	COG0376(Bifunctional enzyme with both catalase and broad- spectrum peroxidase activity (By similarity))	K00434	L-ascorbate peroxidase	EC:1.11.1.11	hbr00053(Ascorbate and aldarate metabolism);hbr00480(Glutathione metabolism)	M5WCH1.1 PF00141.21;peroxidase;	no	no
TRINITY_DN15198_c0_g2	701	TRINITY_DN15198_c0_g2_i1	60S ribosomal protein L22-2 [Manihot esculenta]	RPL22B	60S ribosomal protein L22-2 OS=Arabidopsis thaliana GN=RPL22B PE=2 SV=1	GO:0002181(cytoplasmic translation);GO:0003735(structural constituent of ribosome);GO:0022625(cytosolic large ribosomal subunit)	ENOG4111UVJ(Ribosomal protein)	K02891	large subunit ribosomal protein L22e	-	jcu03010(Ribosome)	A0A0B0NDR5.1 PF01776.15;Ribosomal_L22e;	no	no
TRINITY_DN15213_c0_g2	1336	TRINITY_DN15213_c0_g2_i1;TRINITY_DN15213_c0_g2_i2;TRINITY_DN15213_c0_g2_i3;TRINITY_DN15213_c0_g2_i4	hypothetical protein CDL15_Pgr021402 [Punica granatum]	-	Isoflavone reductase-like protein OS=Olea europaea PE=1 SV=1	GO:0005737(cytoplasm);GO:0005886(plasma membrane);GO:0006979(response to oxidative stress);GO:0016491(oxidoreductase activity);GO:0046686(response to cadmium ion);GO:0055114(oxidation-reduction process)	ENOG410Y0DY(Isoflavone reductase)	NA	NA	NA	NA(NA)	O65904.1 PF05368.11;NmrA;	no	no
TRINITY_DN15242_c0_g6	2745	TRINITY_DN15242_c0_g6_i1	subtilisin-like protease SBT1.6 [Populus trichocarpa]	SBT1.6	Subtilisin-like protease SBT1.6 OS=Arabidopsis thaliana GN=SBT1.6 PE=2 SV=1	GO:0004252(serine-type endopeptidase activity);GO:0005618(cell wall)	COG1404(peptidase (S8 and S53, subtilisin, kexin, sedolisin)	NA	NA	NA	NA(NA)	B9T6I8.1 PF00082.20;Peptidase_S8;	no	no
TRINITY_DN15251_c0_g1	1058	TRINITY_DN15251_c0_g1_i1;TRINITY_DN15251_c0_g1_i2	protein BOLA4, chloroplastic/mitochondrial-like isoform X1 [Hevea brasiliensis]	BOLA4	Protein BOLA4, chloroplastic/mitochondrial OS=Arabidopsis thaliana GN=BOLA4 PE=1 SV=1	GO:0005515(protein binding);GO:0005739(mitochondrion);GO:0008150(biological_process);GO:0009507(chloroplast)	COG0271(Bola-like protein)	NA	NA	NA	NA(NA)	M1CIE4.1 PF01722.16;BolA;	no	no
TRINITY_DN15273_c0_g5	1050	TRINITY_DN15273_c0_g5_i1;TRINITY_DN15273_c0_g5_i2	universal stress protein A-like protein [Populus trichocarpa]	-	-	GO:0005737(cytoplasm);GO:0006950(response to stress);GO:0016787(hydrolase activity)	COG0589(Universal stress protein)	-	-	-	-	B9HJ41.1 PF00582.24;Usp;	no	no
TRINITY_DN15280_c0_g2	936	TRINITY_DN15280_c0_g2_i1;TRINITY_DN15280_c0_g2_i2	PREDICTED: cytochrome c oxidase subunit 5b-1, mitochondrial-like [Juglans regia]	COX5B-1	Cytochrome c oxidase subunit 5b-1, mitochondrial OS=Arabidopsis thaliana GN=COX5B-1 PE=2 SV=1	GO:0004129(cytochrome-c oxidase activity);GO:0005739(mitochondrion);GO:0005740(mitochondrial envelope);GO:0006123(mitochondrial electron transport, cytochrome c to oxygen);GO:0008270(zinc ion binding);GO:0009535(chloroplast thylakoid membrane);GO:0046872(	ENOG4111XEM(cytochrome C oxidase)	K02265	cytochrome c oxidase subunit 5b	-	hbr00190(Oxidative phosphorylation)	B9GWN0.1 PF01215.17;COX5B;	no	no
TRINITY_DN15288_c0_g4	1732	TRINITY_DN15288_c0_g4_i1	17.3 kDa class I heat shock protein [Jatropha curcas]	HSP18.2	18.2 kDa class I heat shock protein OS=Medicago sativa GN=HSP18.2 PE=2 SV=1	GO:0003674(molecular_function);GO:0005737(cytoplasm);GO:0006979(response to oxidative stress);GO:0009408(response to heat);GO:0009644(response to high light intensity);GO:0042542(response to hydrogen peroxide)	COG0071(response to heat)	K13993	HSP20 family protein	-	jcu04141(Protein processing in endoplasmic reticulum)	C6SXG1.1 PF00011.19;HSP20;	no	no
TRINITY_DN15289_c1_g2	797	TRINITY_DN15289_c1_g2_i1	Cytochrome c, class IA/ IB [Trema orientale]	-	Cytochrome c OS=Sambucus nigra PE=1 SV=1	GO:0005758(mitochondrial intermembrane space);GO:0006122(mitochondrial electron transport, ubiquinol to cytochrome c);GO:0006123(mitochondrial electron transport, cytochrome c to oxygen)	COG3474(Electron carrier protein. The oxidized form of the cytochrome c heme group can accept an electron from the heme group of the cytochrome c1 subunit of cytochrome reductase. Cytochrome c then transfers this electron to the cytochrome oxidase complex	-	-	-	-	A0A059BTW6.1 PF00034.19;Cytochrom_C;	no	no
TRINITY_DN15317_c0_g2	1243	TRINITY_DN15317_c0_g2_i1;TRINITY_DN15317_c0_g2_i2;TRINITY_DN15317_c0_g2_i3	LOW QUALITY PROTEIN: 20 kDa chaperonin, chloroplastic [Carica papaya]	CPN20	20 kDa chaperonin, chloroplastic OS=Arabidopsis thaliana GN=CPN20 PE=1 SV=2	GO:0005759(mitochondrial matrix);GO:0006986(response to unfolded protein);GO:0009507(chloroplast);GO:0046872(metal ion binding);GO:0051082(unfolded protein binding);GO:0051085(chaperone cofactor-dependent protein refolding);GO:0051087(chaperone binding)	COG0234(Binds to cpn60 in the presence of Mg-ATP and suppresses the ATPase activity of the latter (By similarity))	NA	NA	NA	NA(NA)	A0A061GK35.1 PF00166.19;Cpn10;	no	no
TRINITY_DN15325_c0_g3	2546	TRINITY_DN15325_c0_g3_i1;TRINITY_DN15325_c0_g3_i2;TRINITY_DN15325_c0_g3_i3	transcription initiation factor TFIID subunit 15b-like [Hevea brasiliensis]	TAF15B	Transcription initiation factor TFIID subunit 15b OS=Arabidopsis thaliana GN=TAF15B PE=1 SV=1	GO:0003723(RNA binding);GO:0005634(nucleus);GO:0006351(transcription, DNA-templated);GO:0006355(regulation of transcription, DNA-templated);GO:0009507(chloroplast);GO:0046872(metal ion binding)	ENOG410Y9ZH(RNA recognition motif. (a.k.a. RRM, RBD, or RNP domain))	NA	NA	NA	NA(NA)	B9S5B9.1 PF00641.16;zf-RanBP;	no	no
TRINITY_DN15326_c0_g2	1576	TRINITY_DN15326_c0_g2_i1;TRINITY_DN15326_c0_g2_i10;TRINITY_DN15326_c0_g2_i2;TRINITY_DN15326_c0_g2_i3;TRINITY_DN15326_c0_g2_i4;TRINITY_DN15326_c0_g2_i5;TRINITY_DN15326_c0_g2_i6;TRINITY_DN15326_c0_g2_i7;TRINITY_DN15326_c0_g2_i8;TRINITY_DN15326_c0_g2_i9	mitochondrial-processing peptidase subunit alpha [Jatropha curcas]	MPP	Mitochondrial-processing peptidase subunit alpha OS=Solanum tuberosum GN=MPP PE=1 SV=1	GO:0004222(metalloendopeptidase activity);GO:0005743(mitochondrial inner membrane);GO:0006627(protein processing involved in protein targeting to mitochondrion);GO:0008270(zinc ion binding)	COG0612(peptidase')	NA	NA	NA	NA(NA)	A0A067L0U6.1 PF05193.19;Peptidase_M16_C;	no	no
TRINITY_DN15343_c1_g7	1434	TRINITY_DN15343_c1_g7_i1;TRINITY_DN15343_c1_g7_i2	senescence-specific cysteine protease SAG39-like [Hevea brasiliensis]	OsI_14861	Senescence-specific cysteine protease SAG39 OS=Oryza sativa subsp. indica GN=OsI_14861 PE=3 SV=1	GO:0004197(cysteine-type endopeptidase activity);GO:0005615(extracellular space);GO:0005764(lysosome);GO:0051603(proteolysis involved in cellular protein catabolic process)	COG4870(cathepsin)	K01365	cathepsin L	EC:3.4.22.15	zju04145(Phagosome)	B9I1N0.2 PF00112.21;Peptidase_C1;	no	no
TRINITY_DN15364_c0_g1	2981	TRINITY_DN15364_c0_g1_i1	linoleate 13S-lipoxygenase 2-1, chloroplastic [Populus trichocarpa]	LOX2.1	Linoleate 13S-lipoxygenase 2-1, chloroplastic OS=Solanum tuberosum GN=LOX2.1 PE=1 SV=1	GO:0016165(linoleate 13S-lipoxygenase activity)	ENOG410YN4N(Plant lipoxygenase may be involved in a number of diverse aspects of plant physiology including growth and development, pest resistance, and senescence or responses to wounding (By similarity))	K00454	lipoxygenase	EC:1.13.11.12	hbr00591(Linoleic acid metabolism);hbr00592(alpha-Linolenic acid metabolism)	M5X5W8.1 PF00305.17;Lipoxygenase;	no	no
TRINITY_DN15379_c0_g1	1954	TRINITY_DN15379_c0_g1_i1;TRINITY_DN15379_c0_g1_i2;TRINITY_DN15379_c0_g1_i3;TRINITY_DN15379_c0_g1_i4;TRINITY_DN15379_c0_g1_i5	glyceraldehyde-3-phosphate dehydrogenase A, chloroplastic [Momordica charantia]	GAPA1	Glyceraldehyde-3-phosphate dehydrogenase GAPA1, chloroplastic OS=Arabidopsis thaliana GN=GAPA1 PE=1 SV=3	GO:0005515(protein binding);GO:0005829(cytosol);GO:0006006(glucose metabolic process);GO:0006096(glycolytic process);GO:0009409(response to cold);GO:0009416(response to light stimulus);GO:0009507(chloroplast);GO:0009535(chloroplast thylakoid membrane);GO:	COG0057(glyceraldehyde3phosphate dehydrogenase)	K05298	glyceraldehyde-3-phosphate dehydrogenase (NADP+) (phosphorylating)	EC:1.2.1.13	mcha00710(Carbon fixation in photosynthetic organisms)	A0A0D2ZPE9.1 PF02800.18;Gp_dh_C;	no	no
TRINITY_DN15379_c0_g3	2118	TRINITY_DN15379_c0_g3_i1;TRINITY_DN15379_c0_g3_i2;TRINITY_DN15379_c0_g3_i3	PREDICTED: serine/arginine-rich splicing factor RSZ21 isoform X1 [Prunus mume]	RSZ21	Serine/arginine-rich splicing factor RSZ21 OS=Arabidopsis thaliana GN=RSZ21 PE=1 SV=1	GO:0000398(mRNA splicing, via spliceosome);GO:0003676(nucleic acid binding);GO:0005515(protein binding);GO:0005634(nucleus);GO:0005681(spliceosomal complex);GO:0008270(zinc ion binding);GO:0016607(nuclear speck)	ENOG4111N8Y(serine arginine-rich splicing factor)	K12896	splicing factor, arginine/serine-rich 7	-	pmum03040(Spliceosome)	A0A067JRP3.1 PF00076.20;RRM_1;	no	no
TRINITY_DN15392_c0_g3	3776	TRINITY_DN15392_c0_g3_i1;TRINITY_DN15392_c0_g3_i2	PREDICTED: guanylate-binding protein 3 [Populus euphratica]	GBP2	Guanylate-binding protein 2 OS=Homo sapiens GN=GBP2 PE=1 SV=3	GO:0003924(GTPase activity);GO:0005525(GTP binding);GO:0005634(nucleus);GO:0005730(nucleolus);GO:0006955(immune response);GO:0009507(chloroplast)	ENOG410XR6Z(Guanylate binding protein)	-	-	-	-	U5G156.1 PF02841.12;GBP_C;	no	no
TRINITY_DN15437_c1_g7	2028	TRINITY_DN15437_c1_g7_i1	plastocyanin [Manihot esculenta]	PETE	Plastocyanin A, chloroplastic OS=Populus nigra GN=PETE PE=1 SV=2	GO:0005507(copper ion binding);GO:0009055(electron transfer activity);GO:0009507(chloroplast);GO:0009535(chloroplast thylakoid membrane);GO:0009543(chloroplast thylakoid lumen);GO:0009579(thylakoid);GO:0031977(thylakoid lumen);GO:0046688(response to coppe	COG3794(Blue (Type 1) copper domain protein)	K02638	plastocyanin	-	rcu00195(Photosynthesis)	A9PG34.1 PF00127.18;Copper-bind;	down	yes
TRINITY_DN10840_c0_g2	1503	TRINITY_DN10840_c0_g2_i1;TRINITY_DN10840_c0_g2_i2	plant UBX domain-containing protein 4 [Populus trichocarpa]	PUX5	Plant UBX domain-containing protein 5 OS=Arabidopsis thaliana GN=PUX5 PE=1 SV=1	GO:0005634(nucleus);GO:0005829(cytosol);GO:0007030(Golgi organization);GO:0031468(nuclear envelope reassembly);GO:0043130(ubiquitin binding);GO:0043161(proteasome-mediated ubiquitin-dependent protein catabolic process);GO:0061025(membrane fusion)	ENOG410YGXU(UBX domain protein)	K14012	UBX domain-containing protein 1	-	jcu04141(Protein processing in endoplasmic reticulum)	B9GTU7.2 PF00789.18;UBX;	no	no
TRINITY_DN15444_c0_g2	685	TRINITY_DN15444_c0_g2_i1	uncharacterized protein LOC110659580 [Hevea brasiliensis]	-	-	GO:0003674(molecular_function);GO:0005739(mitochondrion);GO:0016020(membrane);GO:0016021(integral component of membrane)	ENOG410YZCA(Protein of unknown function (DUF1138))	-	-	-	-	B9S0H2.1 PF06592.11;DUF1138;	no	no
TRINITY_DN15454_c0_g1	3869	TRINITY_DN15454_c0_g1_i1;TRINITY_DN15454_c0_g1_i10;TRINITY_DN15454_c0_g1_i11;TRINITY_DN15454_c0_g1_i12;TRINITY_DN15454_c0_g1_i13;TRINITY_DN15454_c0_g1_i14;TRINITY_DN15454_c0_g1_i15;TRINITY_DN15454_c0_g1_i16;TRINITY_DN15454_c0_g1_i17;TRINITY_DN15454_c0_g1_	protein TIC 62, chloroplastic isoform X1 [Jatropha curcas]	TIC62	Protein TIC 62, chloroplastic OS=Arabidopsis thaliana GN=TIC62 PE=1 SV=1	GO:0009507(chloroplast);GO:0009534(chloroplast thylakoid);GO:0009535(chloroplast thylakoid membrane);GO:0009570(chloroplast stroma);GO:0009706(chloroplast inner membrane);GO:0009941(chloroplast envelope);GO:0015031(protein transport)	COG0702(epimerase dehydratase)	NA	NA	NA	NA(NA)	B9H0M0.1 PF13460.4;NAD_binding_10;	no	no
TRINITY_DN15455_c0_g1	708	TRINITY_DN15455_c0_g1_i1	elongation factor 1-alpha [Plukenetia volubilis]	REFA1	Elongation factor 1-alpha OS=Oryza sativa subsp. japonica GN=REFA1 PE=2 SV=2	GO:0003746(translation elongation factor activity);GO:0003924(GTPase activity);GO:0005622(intracellular)	COG5256(This protein promotes the GTP-dependent binding of aminoacyl-tRNA to the A-site of ribosomes during protein biosynthesis (By similarity))	K03231	elongation factor 1-alpha	-	jcu03013(RNA transport)	L5K105.1 PF00009.25;GTP_EFTU;	up	yes
TRINITY_DN15457_c0_g3	2057	TRINITY_DN15457_c0_g3_i1;TRINITY_DN15457_c0_g3_i10;TRINITY_DN15457_c0_g3_i11;TRINITY_DN15457_c0_g3_i12;TRINITY_DN15457_c0_g3_i13;TRINITY_DN15457_c0_g3_i14;TRINITY_DN15457_c0_g3_i15;TRINITY_DN15457_c0_g3_i16;TRINITY_DN15457_c0_g3_i17;TRINITY_DN15457_c0_g3_	peroxisomal (S)-2-hydroxy-acid oxidase GLO1 isoform X2 [Manihot esculenta]	GLO2	Peroxisomal (S)-2-hydroxy-acid oxidase GLO2 OS=Arabidopsis thaliana GN=GLO2 PE=1 SV=1	GO:0005634(nucleus);GO:0005777(peroxisome);GO:0005829(cytosol);GO:0008891(glycolate oxidase activity);GO:0009506(plasmodesma);GO:0009507(chloroplast);GO:0009570(chloroplast stroma);GO:0009735(response to cytokinin);GO:0009854(oxidative photosynthetic carb	COG1304(Catalyzes the 1,3-allylic rearrangement of the homoallylic substrate isopentenyl (IPP) to its allylic isomer, dimethylallyl diphosphate (DMAPP) (By similarity))	K11517	(S)-2-hydroxy-acid oxidase	EC:1.1.3.15	hbr00630(Glyoxylate and dicarboxylate metabolism);hbr04146(Peroxisome)	A0A059CDA8.1 PF01070.16;FMN_dh;	no	no
TRINITY_DN15464_c0_g7	1445	TRINITY_DN15464_c0_g7_i1	PREDICTED: probable ribose-5-phosphate isomerase 3, chloroplastic [Populus euphratica]	RPI3	Probable ribose-5-phosphate isomerase 3, chloroplastic OS=Arabidopsis thaliana GN=RPI3 PE=1 SV=1	GO:0004751(ribose-5-phosphate isomerase activity);GO:0009052(pentose-phosphate shunt, non-oxidative branch);GO:0009507(chloroplast);GO:0009535(chloroplast thylakoid membrane);GO:0009570(chloroplast stroma);GO:0009579(thylakoid);GO:0009735(response to cyto	COG0120(phosphoriboisomerase A)	K01807	ribose 5-phosphate isomerase A	EC:5.3.1.6	hbr00030(Pentose phosphate pathway);hbr00710(Carbon fixation in photosynthetic organisms)	A0A059D4A6.1 PF06026.12;Rib_5-P_isom_A;	no	no
TRINITY_DN15473_c0_g2	1367	TRINITY_DN15473_c0_g2_i1;TRINITY_DN15473_c0_g2_i10;TRINITY_DN15473_c0_g2_i11;TRINITY_DN15473_c0_g2_i12;TRINITY_DN15473_c0_g2_i13;TRINITY_DN15473_c0_g2_i14;TRINITY_DN15473_c0_g2_i2;TRINITY_DN15473_c0_g2_i3;TRINITY_DN15473_c0_g2_i4;TRINITY_DN15473_c0_g2_i5;	GDP-mannose 3,5-epimerase 2 [Carica papaya]	OsI_032456	GDP-mannose 3,5-epimerase 1 OS=Oryza sativa subsp. indica GN=OsI_032456 PE=2 SV=1	GO:0003824(catalytic activity);GO:0005737(cytoplasm);GO:0005829(cytosol);GO:0009225(nucleotide-sugar metabolic process);GO:0019853(L-ascorbic acid biosynthetic process);GO:0047918(GDP-mannose 3,5-epimerase activity);GO:0051287(NAD binding)	COG0451(Nad-dependent epimerase dehydratase)	K10046	GDP-D-mannose 3', 5'-epimerase	EC:5.1.3.18 5.1.3.-	cpap00053(Ascorbate and aldarate metabolism);cpap00520(Amino sugar and nucleotide sugar metabolism)	B4FBC2.1 PF01370.19;Epimerase;	no	no
TRINITY_DN15473_c0_g3	2081	TRINITY_DN15473_c0_g3_i1;TRINITY_DN15473_c0_g3_i10;TRINITY_DN15473_c0_g3_i2;TRINITY_DN15473_c0_g3_i3;TRINITY_DN15473_c0_g3_i4;TRINITY_DN15473_c0_g3_i5;TRINITY_DN15473_c0_g3_i6;TRINITY_DN15473_c0_g3_i7;TRINITY_DN15473_c0_g3_i8;TRINITY_DN15473_c0_g3_i9	glyoxylate/succinic semialdehyde reductase 2, chloroplastic [Populus trichocarpa]	GLYR2	Glyoxylate/succinic semialdehyde reductase 2, chloroplastic OS=Arabidopsis thaliana GN=GLYR2 PE=1 SV=1	GO:0004616(phosphogluconate dehydrogenase (decarboxylating) activity);GO:0005739(mitochondrion);GO:0009507(chloroplast);GO:0009570(chloroplast stroma);GO:0016616(oxidoreductase activity, acting on the CH-OH group of donors, NAD or NADP as acceptor);GO:003	COG2084(Dehydrogenase)	K18121	glyoxylate/succinic semialdehyde reductase	EC:1.1.1.79 1.1.1.-	jcu00630(Glyoxylate and dicarboxylate metabolism);jcu00650(Butanoate metabolism)	A0A067FP98.1 PF03446.13;NAD_binding_2;	no	no
TRINITY_DN15492_c0_g2	1391	TRINITY_DN15492_c0_g2_i1;TRINITY_DN15492_c0_g2_i2;TRINITY_DN15492_c0_g2_i3	heat shock cognate 70 kDa protein 2 [Ricinus communis]	HSC-2	Heat shock cognate 70 kDa protein 2 OS=Solanum lycopersicum GN=HSC-2 PE=2 SV=1	GO:0002020(protease binding);GO:0005515(protein binding);GO:0005524(ATP binding);GO:0005618(cell wall);GO:0005634(nucleus);GO:0005730(nucleolus);GO:0005737(cytoplasm);GO:0005774(vacuolar membrane);GO:0005794(Golgi apparatus);GO:0005829(cytosol);GO:0005886	COG0443(Heat shock protein)	K03283	heat shock 70kDa protein 1/2/6/8	-	rcu03040(Spliceosome);rcu04141(Protein processing in endoplasmic reticulum);rcu04144(Endocytosis)	I1GLJ7.1 PF00012.18;HSP70;	no	no
TRINITY_DN15492_c0_g8	1299	TRINITY_DN15492_c0_g8_i1	heat shock cognate 70 kDa protein 2 [Manihot esculenta]	HSC-2	Heat shock cognate 70 kDa protein 2 OS=Solanum lycopersicum GN=HSC-2 PE=2 SV=1	GO:0005524(ATP binding);GO:0005618(cell wall);GO:0005634(nucleus);GO:0005739(mitochondrion);GO:0005774(vacuolar membrane);GO:0005794(Golgi apparatus);GO:0005829(cytosol);GO:0005886(plasma membrane);GO:0006351(transcription, DNA-templated);GO:0006355(regul	COG0443(Heat shock protein)	K03283	heat shock 70kDa protein 1/2/6/8	-	hbr03040(Spliceosome);hbr04141(Protein processing in endoplasmic reticulum);hbr04144(Endocytosis)	A0A078IS30.1 PF00012.18;HSP70;	no	no
TRINITY_DN12055_c0_g4	849	TRINITY_DN12055_c0_g4_i1;TRINITY_DN12055_c0_g4_i2	60S ribosomal protein L35a [Vernicia fordii]	RPL35AC	60S ribosomal protein L35a-3 OS=Arabidopsis thaliana GN=RPL35AC PE=3 SV=1	GO:0002181(cytoplasmic translation);GO:0003735(structural constituent of ribosome);GO:0022625(cytosolic large ribosomal subunit);GO:0042273(ribosomal large subunit biogenesis)	COG2451(Ribosomal protein)	K02917	large subunit ribosomal protein L35Ae	-	pvu03010(Ribosome)	A0A061ESF1.1 PF01247.16;Ribosomal_L35Ae;	up	yes
TRINITY_DN15516_c1_g1	1940	TRINITY_DN15516_c1_g1_i1;TRINITY_DN15516_c1_g1_i2;TRINITY_DN15516_c1_g1_i3;TRINITY_DN15516_c1_g1_i4;TRINITY_DN15516_c1_g1_i5;TRINITY_DN15516_c1_g1_i6;TRINITY_DN15516_c1_g1_i7;TRINITY_DN15516_c1_g1_i8	PREDICTED: catalase isozyme 1 [Theobroma cacao]	CAT1	Catalase isozyme 1 OS=Gossypium hirsutum GN=CAT1 PE=2 SV=2	GO:0004096(catalase activity);GO:0005737(cytoplasm);GO:0020037(heme binding);GO:0042542(response to hydrogen peroxide);GO:0042744(hydrogen peroxide catabolic process)	COG0753(Catalase)	K03781	catalase	EC:1.11.1.6	tcc00630(Glyoxylate and dicarboxylate metabolism);tcc00380(Tryptophan metabolism);tcc04016(MAPK signaling pathway - plant);tcc04146(Peroxisome)	F4JM86.1 PF00199.17;Catalase;	no	no
TRINITY_DN15546_c0_g3	2388	TRINITY_DN15546_c0_g3_i1;TRINITY_DN15546_c0_g3_i2;TRINITY_DN15546_c0_g3_i3;TRINITY_DN15546_c0_g3_i4;TRINITY_DN15546_c0_g3_i5;TRINITY_DN15546_c0_g3_i6;TRINITY_DN15546_c0_g3_i7	PREDICTED: catalase isozyme 1 [Vitis vinifera]	CAT1	Catalase isozyme 1 OS=Gossypium hirsutum GN=CAT1 PE=2 SV=2	GO:0004096(catalase activity);GO:0005737(cytoplasm);GO:0020037(heme binding);GO:0042542(response to hydrogen peroxide);GO:0042744(hydrogen peroxide catabolic process)	COG0753(Catalase)	K03781	catalase	EC:1.11.1.6	vvi00630(Glyoxylate and dicarboxylate metabolism);vvi00380(Tryptophan metabolism);vvi04016(MAPK signaling pathway - plant);vvi04146(Peroxisome)	F6I0K4.1 PF00199.17;Catalase;	no	no
TRINITY_DN15551_c0_g1	1915	TRINITY_DN15551_c0_g1_i1;TRINITY_DN15551_c0_g1_i2;TRINITY_DN15551_c0_g1_i3	PREDICTED: photosystem I reaction center subunit N, chloroplastic-like [Nelumbo nucifera]	PSAN	Photosystem I reaction center subunit N, chloroplastic OS=Arabidopsis thaliana GN=PSAN PE=1 SV=2	GO:0005516(calmodulin binding);GO:0009507(chloroplast);GO:0009522(photosystem I);GO:0009534(chloroplast thylakoid);GO:0009535(chloroplast thylakoid membrane);GO:0009543(chloroplast thylakoid lumen);GO:0009579(thylakoid);GO:0009773(photosynthetic electron	ENOG411281Y(Photosystem I reaction center subunit)	K02701	photosystem I subunit PsaN	-	nnu00195(Photosynthesis)	A0A067L5Q4.1 PF05479.9;PsaN;	no	no
TRINITY_DN15560_c0_g2	720	TRINITY_DN15560_c0_g2_i1;TRINITY_DN15560_c0_g2_i2	putative histone H2A 6 [Helianthus annuus]	At5g27670	Probable histone H2A.5 OS=Arabidopsis thaliana GN=At5g27670 PE=1 SV=1	GO:0000786(nucleosome);GO:0000790(nuclear chromatin);GO:0000792(heterochromatin);GO:0003677(DNA binding);GO:0003682(chromatin binding);GO:0005634(nucleus);GO:0005730(nucleolus);GO:0006325(chromatin organization);GO:0006342(chromatin silencing);GO:0046982(	COG5262(histone h2a)	NA	NA	NA	NA(NA)	A5B8T6.1 PF00125.22;Histone;	down	yes
TRINITY_DN15572_c0_g4	1691	TRINITY_DN15572_c0_g4_i1	uncharacterized protein LOC110600765 [Manihot esculenta]	asd	Aspartate-semialdehyde dehydrogenase OS=Synechocystis sp. (strain PCC 6803 / Kazusa) GN=asd PE=3 SV=2	GO:0004073(aspartate-semialdehyde dehydrogenase activity);GO:0005739(mitochondrion);GO:0006520(cellular amino acid metabolic process);GO:0009507(chloroplast);GO:0009536(plastid);GO:0009570(chloroplast stroma);GO:0016620(oxidoreductase activity, acting on	COG0136(Catalyzes the NADPH-dependent formation of L-aspartate- semialdehyde (L-ASA) by the reductive dephosphorylation of L- aspartyl-4-phosphate (By similarity))	K00133	aspartate-semialdehyde dehydrogenase	EC:1.2.1.11	hbr00260(Glycine, serine and threonine metabolism);hbr00270(Cysteine and methionine metabolism);hbr00300(Lysine biosynthesis);hbr00261(Monobactam biosynthesis)	B9HJH4.1 PF02774.16;Semialdhyde_dhC;	down	yes
TRINITY_DN15573_c0_g1	2086	TRINITY_DN15573_c0_g1_i1;TRINITY_DN15573_c0_g1_i10;TRINITY_DN15573_c0_g1_i11;TRINITY_DN15573_c0_g1_i12;TRINITY_DN15573_c0_g1_i13;TRINITY_DN15573_c0_g1_i2;TRINITY_DN15573_c0_g1_i3;TRINITY_DN15573_c0_g1_i4;TRINITY_DN15573_c0_g1_i5;TRINITY_DN15573_c0_g1_i6;T	probable aquaporin PIP2-4 [Populus trichocarpa]	PIP2-2	Probable aquaporin PIP2-2 OS=Oryza sativa subsp. japonica GN=PIP2-2 PE=2 SV=1	GO:0005773(vacuole);GO:0005887(integral component of plasma membrane);GO:0009506(plasmodesma);GO:0009992(cellular water homeostasis);GO:0015250(water channel activity);GO:0015254(glycerol channel activity);GO:0034220(ion transmembrane transport)	COG0580(Channel that permits osmotically driven movement of water in both directions. It is involved in the osmoregulation and in the maintenance of cell turgor during volume expansion in rapidly growing cells. It mediates rapid entry or exit of water in	NA	NA	NA	NA(NA)	V4SL90.1 PF00230.18;MIP;	no	no
TRINITY_DN15579_c0_g5	1885	TRINITY_DN15579_c0_g5_i1	inosine-5'-monophosphate dehydrogenase 2-like [Hevea brasiliensis]	At1g16350	Inosine-5'-monophosphate dehydrogenase 2 OS=Arabidopsis thaliana GN=At1g16350 PE=1 SV=1	GO:0003938(IMP dehydrogenase activity);GO:0005829(cytosol);GO:0006177(GMP biosynthetic process);GO:0009735(response to cytokinin);GO:0046872(metal ion binding);GO:0055114(oxidation-reduction process)	COG0516(Catalyzes the conversion of inosine 5'-phosphate (IMP) to xanthosine 5'-phosphate (XMP), the first committed and rate- limiting step in the de novo synthesis of guanine nucleotides, and therefore plays an important role in the regulation of cell g	K00088	IMP dehydrogenase	EC:1.1.1.205	hbr00230(Purine metabolism)	B9RRP5.1 PF00478.23;IMPDH;	no	no
TRINITY_DN15583_c1_g2	2289	TRINITY_DN15583_c1_g2_i1;TRINITY_DN15583_c1_g2_i2;TRINITY_DN15583_c1_g2_i3;TRINITY_DN15583_c1_g2_i4;TRINITY_DN15583_c1_g2_i5;TRINITY_DN15583_c1_g2_i6;TRINITY_DN15583_c1_g2_i7	ruBisCO large subunit-binding protein subunit alpha [Jatropha curcas]	-	RuBisCO large subunit-binding protein subunit alpha, chloroplastic OS=Pisum sativum PE=1 SV=2	GO:0005524(ATP binding);GO:0005739(mitochondrion);GO:0005829(cytosol);GO:0006457(protein folding);GO:0006458('de novo' protein folding);GO:0007005(mitochondrion organization);GO:0009507(chloroplast);GO:0009570(chloroplast stroma);GO:0009579(thylakoid);GO:	COG0459(Prevents misfolding and promotes the refolding and proper assembly of unfolded polypeptides generated under stress conditions (By similarity))	K04077	chaperonin GroEL	-	ccp03018(RNA degradation)	W9SAI5.1 PF00118.22;Cpn60_TCP1;	no	no
TRINITY_DN15589_c0_g1	2292	TRINITY_DN15589_c0_g1_i1;TRINITY_DN15589_c0_g1_i10;TRINITY_DN15589_c0_g1_i11;TRINITY_DN15589_c0_g1_i12;TRINITY_DN15589_c0_g1_i13;TRINITY_DN15589_c0_g1_i2;TRINITY_DN15589_c0_g1_i3;TRINITY_DN15589_c0_g1_i4;TRINITY_DN15589_c0_g1_i5;TRINITY_DN15589_c0_g1_i6;T	RecName: Full=GTP-binding nuclear protein Ran1A	RAN1A	GTP-binding nuclear protein Ran1A (Fragment) OS=Lotus japonicus GN=RAN1A PE=2 SV=1	GO:0000054(ribosomal subunit export from nucleus);GO:0003924(GTPase activity);GO:0005634(nucleus);GO:0005737(cytoplasm);GO:0006606(protein import into nucleus)	ENOG410XNRS(GTP-binding nuclear protein)	K07936	GTP-binding nuclear protein Ran	-	adu03013(RNA transport);adu03008(Ribosome biogenesis in eukaryotes)	A0A067GNU0.1 PF00071.20;Ras;	no	no
TRINITY_DN10853_c0_g1	1744	TRINITY_DN10853_c0_g1_i1;TRINITY_DN10853_c0_g1_i2;TRINITY_DN10853_c0_g1_i3	acetyl-CoA acetyltransferase, cytosolic 1 [Jatropha curcas]	AAT1	Acetyl-CoA acetyltransferase, cytosolic 1 OS=Arabidopsis thaliana GN=AAT1 PE=2 SV=1	GO:0003985(acetyl-CoA C-acetyltransferase activity);GO:0005737(cytoplasm);GO:0005739(mitochondrion);GO:0005777(peroxisome);GO:0005829(cytosol);GO:0005886(plasma membrane);GO:0006635(fatty acid beta-oxidation);GO:0008299(isoprenoid biosynthetic process);GO	COG0183(acetyl-coa acetyltransferase)	K00626	acetyl-CoA C-acetyltransferase	EC:2.3.1.9	jcu00620(Pyruvate metabolism);jcu00630(Glyoxylate and dicarboxylate metabolism);jcu00640(Propanoate metabolism);jcu00650(Butanoate metabolism);jcu00071(Fatty acid degradation);jcu00072(Synthesis and degradation of ketone bodies);jcu00280(Valine, leucine a	A0A067KCI0.1 PF00108.21;Thiolase_N;	no	no
TRINITY_DN10853_c0_g2	1667	TRINITY_DN10853_c0_g2_i1	acetyl-CoA acetyltransferase, cytosolic 1 [Hevea brasiliensis]	AAT1	Acetyl-CoA acetyltransferase, cytosolic 1 OS=Arabidopsis thaliana GN=AAT1 PE=2 SV=1	GO:0003985(acetyl-CoA C-acetyltransferase activity);GO:0005737(cytoplasm);GO:0005739(mitochondrion);GO:0005777(peroxisome);GO:0005829(cytosol);GO:0005886(plasma membrane);GO:0006635(fatty acid beta-oxidation);GO:0008299(isoprenoid biosynthetic process);GO	COG0183(acetyl-coa acetyltransferase)	K00626	acetyl-CoA C-acetyltransferase	EC:2.3.1.9	hbr00620(Pyruvate metabolism);hbr00630(Glyoxylate and dicarboxylate metabolism);hbr00640(Propanoate metabolism);hbr00650(Butanoate metabolism);hbr00071(Fatty acid degradation);hbr00072(Synthesis and degradation of ketone bodies);hbr00280(Valine, leucine a	A0A067KCI0.1 PF00108.21;Thiolase_N;	no	no
TRINITY_DN15616_c0_g5	1313	TRINITY_DN15616_c0_g5_i1;TRINITY_DN15616_c0_g5_i2	histone H1.2 [Prunus persica]	At2g30620	Histone H1.2 OS=Arabidopsis thaliana GN=At2g30620 PE=1 SV=1	GO:0000786(nucleosome);GO:0003677(DNA binding);GO:0005634(nucleus);GO:0005730(nucleolus);GO:0005739(mitochondrion);GO:0006334(nucleosome assembly)	ENOG410XYG5(histone h1)	NA	NA	NA	NA(NA)	A0A0A0KDR2.1 PF00538.17;Linker_histone;	up	yes
TRINITY_DN15634_c0_g2	1229	TRINITY_DN15634_c0_g2_i1	PREDICTED: eukaryotic translation initiation factor 3 subunit G-B [Vitis vinifera]	eif3g	Eukaryotic translation initiation factor 3 subunit G OS=Xenopus tropicalis GN=eif3g PE=2 SV=1	GO:0003723(RNA binding);GO:0003729(mRNA binding);GO:0003743(translation initiation factor activity);GO:0005737(cytoplasm);GO:0005852(eukaryotic translation initiation factor 3 complex);GO:0005886(plasma membrane);GO:0006413(translational initiation)	ENOG410Y3CW(Component of the eukaryotic translation initiation factor 3 (eIF-3) complex)	K03248	translation initiation factor 3 subunit G	-	vvi03013(RNA transport)	F6GUX9.1 PF12353.6;eIF3g;	no	no
TRINITY_DN15651_c0_g1	4044	TRINITY_DN15651_c0_g1_i1;TRINITY_DN15651_c0_g1_i2;TRINITY_DN15651_c0_g1_i3;TRINITY_DN15651_c0_g1_i4;TRINITY_DN15651_c0_g1_i5	aconitate hydratase, cytoplasmic [Jatropha curcas]	ACO2	Aconitate hydratase 2, mitochondrial OS=Arabidopsis thaliana GN=ACO2 PE=1 SV=2	GO:0003994(aconitate hydratase activity);GO:0005507(copper ion binding);GO:0005515(protein binding);GO:0005524(ATP binding);GO:0005618(cell wall);GO:0005737(cytoplasm);GO:0005739(mitochondrion);GO:0005774(vacuolar membrane);GO:0005794(Golgi apparatus);GO:	COG1048(aconitate hydratase)	K01681	aconitate hydratase	EC:4.2.1.3	jcu00020(Citrate cycle (TCA cycle));jcu00630(Glyoxylate and dicarboxylate metabolism)	A0A067F5Z2.1 PF00330.18;Aconitase;	no	no
TRINITY_DN15653_c0_g1	2512	TRINITY_DN15653_c0_g1_i1;TRINITY_DN15653_c0_g1_i10;TRINITY_DN15653_c0_g1_i11;TRINITY_DN15653_c0_g1_i12;TRINITY_DN15653_c0_g1_i13;TRINITY_DN15653_c0_g1_i14;TRINITY_DN15653_c0_g1_i15;TRINITY_DN15653_c0_g1_i2;TRINITY_DN15653_c0_g1_i3;TRINITY_DN15653_c0_g1_i4	PREDICTED: luminal-binding protein 5-like [Populus euphratica]	BIP5	Luminal-binding protein 5 OS=Nicotiana tabacum GN=BIP5 PE=2 SV=1	GO:0005783(endoplasmic reticulum)	COG0443(Heat shock protein)	K09490	heat shock 70kDa protein 5	-	jcu03060(Protein export);jcu04141(Protein processing in endoplasmic reticulum)	I1K668.2 PF00012.18;HSP70;	no	no
TRINITY_DN15655_c0_g2	1222	TRINITY_DN15655_c0_g2_i1;TRINITY_DN15655_c0_g2_i10;TRINITY_DN15655_c0_g2_i11;TRINITY_DN15655_c0_g2_i12;TRINITY_DN15655_c0_g2_i13;TRINITY_DN15655_c0_g2_i14;TRINITY_DN15655_c0_g2_i15;TRINITY_DN15655_c0_g2_i16;TRINITY_DN15655_c0_g2_i17;TRINITY_DN15655_c0_g2_	60S ribosomal protein L5-like [Populus trichocarpa]	RPL5	60S ribosomal protein L5 OS=Cucumis sativus GN=RPL5 PE=2 SV=1	GO:0000027(ribosomal large subunit assembly);GO:0003735(structural constituent of ribosome);GO:0006412(translation);GO:0008097(5S rRNA binding);GO:0022625(cytosolic large ribosomal subunit)	COG0256(This is one of the proteins that binds and probably mediates the attachment of the 5S RNA into the large ribosomal subunit, where it forms part of the central protuberance (By similarity))	K02932	large subunit ribosomal protein L5e	-	rcu03010(Ribosome)	B9SEY9.1 PF17144.2;Ribosomal_L5e;	no	no
TRINITY_DN15664_c0_g1	1284	TRINITY_DN15664_c0_g1_i1;TRINITY_DN15664_c0_g1_i10;TRINITY_DN15664_c0_g1_i11;TRINITY_DN15664_c0_g1_i12;TRINITY_DN15664_c0_g1_i13;TRINITY_DN15664_c0_g1_i14;TRINITY_DN15664_c0_g1_i15;TRINITY_DN15664_c0_g1_i16;TRINITY_DN15664_c0_g1_i2;TRINITY_DN15664_c0_g1_i	PREDICTED: cytochrome b6-f complex iron-sulfur subunit, chloroplastic-like [Populus euphratica]	petC	Cytochrome b6-f complex iron-sulfur subunit, chloroplastic OS=Pisum sativum GN=petC PE=2 SV=1	GO:0005515(protein binding);GO:0005886(plasma membrane);GO:0009496(plastoquinol--plastocyanin reductase activity);GO:0009507(chloroplast);GO:0009512(cytochrome b6f complex);GO:0009534(chloroplast thylakoid);GO:0009535(chloroplast thylakoid membrane);GO:00	COG0723(Component of the ubiquinol-cytochrome c reductase complex (complex III or cytochrome b-c1 complex), which is a respiratory chain that generates an electrochemical potential coupled to ATP synthesis (By similarity))	K02636	cytochrome b6-f complex iron-sulfur subunit	EC:1.10.9.1	ccaj00195(Photosynthesis)	W5FLN6.1 PF00355.24;Rieske;	down	yes
TRINITY_DN10861_c0_g2	1167	TRINITY_DN10861_c0_g2_i1;TRINITY_DN10861_c0_g2_i2	probable carboxylesterase 12 [Ricinus communis]	CXE12	Probable carboxylesterase 12 OS=Arabidopsis thaliana GN=CXE12 PE=1 SV=1	GO:0005634(nucleus);GO:0005737(cytoplasm);GO:0005829(cytosol);GO:0009056(catabolic process);GO:0052689(carboxylic ester hydrolase activity)	COG0657(alpha beta hydrolase fold-3 domain protein)	NA	NA	NA	NA(NA)	B9RY25.1 PF07859.11;Abhydrolase_3;	no	no
TRINITY_DN10863_c0_g2	1090	TRINITY_DN10863_c0_g2_i1;TRINITY_DN10863_c0_g2_i2	adenylate kinase 4 [Manihot esculenta]	ADK-B	Adenylate kinase 4 OS=Oryza sativa subsp. japonica GN=ADK-B PE=2 SV=1	GO:0004017(adenylate kinase activity);GO:0006163(purine nucleotide metabolic process)	COG0563(Catalyzes the reversible transfer of the terminal phosphate group between ATP and AMP. Plays an important role in cellular energy homeostasis and in adenine nucleotide metabolism (By similarity))	K00939	adenylate kinase	EC:2.7.4.3	rcu00230(Purine metabolism);rcu00730(Thiamine metabolism)	S8C490.1 PF00406.20;ADK;	no	no
TRINITY_DN15688_c0_g2	3724	TRINITY_DN15688_c0_g2_i1;TRINITY_DN15688_c0_g2_i2;TRINITY_DN15688_c0_g2_i3	KH domain-containing protein At4g18375 [Manihot esculenta]	At4g18375	KH domain-containing protein At4g18375 OS=Arabidopsis thaliana GN=At4g18375 PE=2 SV=1	GO:0003676(nucleic acid binding);GO:0003723(RNA binding);GO:0003729(mRNA binding);GO:0005634(nucleus);GO:0008150(biological_process)	ENOG410XNN8(mRNA transport)	NA	NA	NA	NA(NA)	B9T4F4.1 PF00013.27;KH_1;	no	no
TRINITY_DN15703_c2_g1	1260	TRINITY_DN15703_c2_g1_i1;TRINITY_DN15703_c2_g1_i2;TRINITY_DN15703_c2_g1_i3;TRINITY_DN15703_c2_g1_i4;TRINITY_DN15703_c2_g1_i5;TRINITY_DN15703_c2_g1_i6;TRINITY_DN15703_c2_g1_i7	Elongation factor 1-alpha, partial [Mucuna pruriens]	EF1	Elongation factor 1-alpha OS=Manihot esculenta GN=EF1 PE=3 SV=1	GO:0003746(translation elongation factor activity);GO:0003924(GTPase activity);GO:0005622(intracellular)	COG5256(This protein promotes the GTP-dependent binding of aminoacyl-tRNA to the A-site of ribosomes during protein biosynthesis (By similarity))	K03231	elongation factor 1-alpha	-	jcu03013(RNA transport)	A0A0D2ND66.1 PF00009.25;GTP_EFTU;	no	no
TRINITY_DN15706_c1_g1	3213	TRINITY_DN15706_c1_g1_i1;TRINITY_DN15706_c1_g1_i10;TRINITY_DN15706_c1_g1_i11;TRINITY_DN15706_c1_g1_i2;TRINITY_DN15706_c1_g1_i3;TRINITY_DN15706_c1_g1_i4;TRINITY_DN15706_c1_g1_i5;TRINITY_DN15706_c1_g1_i6;TRINITY_DN15706_c1_g1_i7;TRINITY_DN15706_c1_g1_i8;TRI	uncharacterized protein LOC105645844 [Jatropha curcas]	rps1b	30S ribosomal protein S1 homolog B OS=Synechocystis sp. (strain PCC 6803 / Kazusa) GN=rps1b PE=3 SV=1	GO:0003723(RNA binding);GO:0005730(nucleolus);GO:0032040(small-subunit processome)	COG0539(thus facilitating recognition of the initiation point. It is needed to translate mRNA with a short Shine-Dalgarno (SD) purine-rich sequence (By similarity))	-	-	-	-	D7KPD0.1 PF00829.19;Ribosomal_L21p;	no	no
TRINITY_DN15714_c0_g1	3170	TRINITY_DN15714_c0_g1_i1;TRINITY_DN15714_c0_g1_i2	pumilio homolog 6, chloroplastic isoform X1 [Jatropha curcas]	APUM6	Pumilio homolog 6, chloroplastic OS=Arabidopsis thaliana GN=APUM6 PE=1 SV=1	GO:0003723(RNA binding);GO:0003729(mRNA binding);GO:0006417(regulation of translation);GO:0009507(chloroplast)	COG5099(pumilio homolog)	NA	NA	NA	NA(NA)	A0A067LDW0.1 PF07990.10;NABP;	down	yes
TRINITY_DN15727_c1_g4	1500	TRINITY_DN15727_c1_g4_i1;TRINITY_DN15727_c1_g4_i2	glucan endo-1,3-beta-glucosidase, basic vacuolar isoform-like [Quercus suber]	HGN1	Glucan endo-1,3-beta-glucosidase, basic vacuolar isoform OS=Hevea brasiliensis GN=HGN1 PE=1 SV=2	GO:0004553(hydrolase activity, hydrolyzing O-glycosyl compounds);GO:0030247(polysaccharide binding);GO:0046658(anchored component of plasma membrane)	ENOG410YAHP(glucan endo-1-3-beta-glucosidase)	K19892	glucan endo-1,3-beta-glucosidase 4	EC:3.2.1.39	zma00500(Starch and sucrose metabolism)	B9HWZ4.2 PF00332.16;Glyco_hydro_17;	no	no
TRINITY_DN10866_c0_g1	1005	TRINITY_DN10866_c0_g1_i1;TRINITY_DN10866_c0_g1_i2;TRINITY_DN10866_c0_g1_i3;TRINITY_DN10866_c0_g1_i4;TRINITY_DN10866_c0_g1_i5;TRINITY_DN10866_c0_g1_i6;TRINITY_DN10866_c0_g1_i7;TRINITY_DN10866_c0_g1_i8	nitrogen regulatory protein P-II homolog isoform X1 [Hevea brasiliensis]	GLB1	Nitrogen regulatory protein P-II homolog OS=Arabidopsis thaliana GN=GLB1 PE=1 SV=1	GO:0000287(magnesium ion binding);GO:0005515(protein binding);GO:0005524(ATP binding);GO:0005829(cytosol);GO:0006351(transcription, DNA-templated);GO:0006355(regulation of transcription, DNA-templated);GO:0006807(nitrogen compound metabolic process);GO:00	COG0347(Nitrogen regulatory protein pii)	-	-	-	-	M5XMG7.1 PF00543.20;P-II;	no	no
TRINITY_DN15732_c0_g5	815	TRINITY_DN15732_c0_g5_i1;TRINITY_DN15732_c0_g5_i2	Mms zwei [Theobroma cacao]	UEV1A	Ubiquitin-conjugating enzyme E2 variant 1A OS=Arabidopsis thaliana GN=UEV1A PE=1 SV=1	GO:0005634(nucleus);GO:0005737(cytoplasm);GO:0006301(postreplication repair);GO:0031625(ubiquitin protein ligase binding);GO:0061630(ubiquitin protein ligase activity);GO:0070534(protein K63-linked ubiquitination)	ENOG4111MDW(ubiquitin-conjugating enzyme)	NA	NA	NA	NA(NA)	A0A061E9M9.1 PF00179.24;UQ_con;	no	no
TRINITY_DN15735_c0_g1	2422	TRINITY_DN15735_c0_g1_i1;TRINITY_DN15735_c0_g1_i10;TRINITY_DN15735_c0_g1_i11;TRINITY_DN15735_c0_g1_i12;TRINITY_DN15735_c0_g1_i13;TRINITY_DN15735_c0_g1_i14;TRINITY_DN15735_c0_g1_i15;TRINITY_DN15735_c0_g1_i16;TRINITY_DN15735_c0_g1_i2;TRINITY_DN15735_c0_g1_i	aspartic proteinase [Ricinus communis]	APA1	Aspartic proteinase A1 OS=Arabidopsis thaliana GN=APA1 PE=1 SV=1	GO:0004190(aspartic-type endopeptidase activity);GO:0006508(proteolysis);GO:0030163(protein catabolic process)	ENOG410XNV7(aspartic)	NA	NA	NA	NA(NA)	B9SVA7.1 PF00026.21;Asp;	no	no
TRINITY_DN10869_c0_g4	952	TRINITY_DN10869_c0_g4_i1	glycine-rich RNA-binding protein 3, mitochondrial [Prunus persica]	cirbp	Cold-inducible RNA-binding protein OS=Xenopus tropicalis GN=cirbp PE=2 SV=1	GO:0003723(RNA binding);GO:0005515(protein binding);GO:0006397(mRNA processing);GO:0009507(chloroplast);GO:0016554(cytidine to uridine editing);GO:1900871(chloroplast mRNA modification)	COG0724(Rna-binding protein)	NA	NA	NA	NA(NA)	A0A067LMZ6.1 PF00076.20;RRM_1;	no	no
TRINITY_DN15775_c0_g2	4395	TRINITY_DN15775_c0_g2_i1;TRINITY_DN15775_c0_g2_i2;TRINITY_DN15775_c0_g2_i3	myosin-9-like [Hevea brasiliensis]	-	-	GO:0003674(molecular_function);GO:0005737(cytoplasm)	ENOG410XXAW(NA)	NA	NA	NA	NA(NA)	-	no	no
TRINITY_DN10872_c0_g7	1226	TRINITY_DN10872_c0_g7_i1	electron transfer flavoprotein subunit alpha, mitochondrial-like isoform X1 [Hevea brasiliensis]	ETFA	Electron transfer flavoprotein subunit alpha, mitochondrial OS=Arabidopsis thaliana GN=ETFA PE=1 SV=1	GO:0000062(fatty-acyl-CoA binding);GO:0003995(acyl-CoA dehydrogenase activity);GO:0005739(mitochondrion);GO:0009055(electron transfer activity);GO:0033539(fatty acid beta-oxidation using acyl-CoA dehydrogenase);GO:0050660(flavin adenine dinucleotide bindi	COG2025(Electron transfer flavoprotein)	NA	NA	NA	NA(NA)	A0A067KVP8.1 PF01012.19;ETF;	no	no
TRINITY_DN15781_c0_g2	3634	TRINITY_DN15781_c0_g2_i1;TRINITY_DN15781_c0_g2_i10;TRINITY_DN15781_c0_g2_i11;TRINITY_DN15781_c0_g2_i2;TRINITY_DN15781_c0_g2_i3;TRINITY_DN15781_c0_g2_i4;TRINITY_DN15781_c0_g2_i5;TRINITY_DN15781_c0_g2_i6;TRINITY_DN15781_c0_g2_i7;TRINITY_DN15781_c0_g2_i8;TRI	golgin candidate 5-like isoform X1 [Hevea brasiliensis]	GC5	Golgin candidate 5 OS=Arabidopsis thaliana GN=GC5 PE=1 SV=1	-	ENOG410Y3EG(golgin candidate)	NA	NA	NA	NA(NA)	A0A067KQL6.1 PF12325.6;TMF_TATA_bd;	no	no
TRINITY_DN15785_c0_g3	3180	TRINITY_DN15785_c0_g3_i1;TRINITY_DN15785_c0_g3_i2;TRINITY_DN15785_c0_g3_i3;TRINITY_DN15785_c0_g3_i4;TRINITY_DN15785_c0_g3_i5;TRINITY_DN15785_c0_g3_i6;TRINITY_DN15785_c0_g3_i7	uncharacterized protein LOC105649755 [Jatropha curcas]	-	-	GO:0005634(nucleus)	ENOG410YCKV(function DUF1296 domain containing protein, expressed)	NA	NA	NA	NA(NA)	A0A067GRK0.1 PF06972.9;DUF1296;	no	no
TRINITY_DN15798_c0_g1	3832	TRINITY_DN15798_c0_g1_i1;TRINITY_DN15798_c0_g1_i10;TRINITY_DN15798_c0_g1_i11;TRINITY_DN15798_c0_g1_i12;TRINITY_DN15798_c0_g1_i13;TRINITY_DN15798_c0_g1_i14;TRINITY_DN15798_c0_g1_i15;TRINITY_DN15798_c0_g1_i2;TRINITY_DN15798_c0_g1_i3;TRINITY_DN15798_c0_g1_i4	villin-4 [Ricinus communis]	VLN4	Villin-4 OS=Arabidopsis thaliana GN=VLN4 PE=1 SV=1	GO:0003779(actin binding);GO:0005737(cytoplasm);GO:0005856(cytoskeleton);GO:0007010(cytoskeleton organization);GO:0051015(actin filament binding);GO:0051017(actin filament bundle assembly);GO:0051693(actin filament capping)	ENOG410XR0A(capping protein (actin filament) gelsolin-like)	NA	NA	NA	NA(NA)	W1PJV7.1 PF00626.20;Gelsolin;	no	no
TRINITY_DN15803_c0_g3	622	TRINITY_DN15803_c0_g3_i1	10 kDa chaperonin, mitochondrial-like [Carica papaya]	-	10 kDa chaperonin OS=Brassica napus PE=3 SV=1	GO:0005759(mitochondrial matrix);GO:0006986(response to unfolded protein);GO:0046872(metal ion binding);GO:0051082(unfolded protein binding);GO:0051085(chaperone cofactor-dependent protein refolding);GO:0051087(chaperone binding)	COG0234(Binds to cpn60 in the presence of Mg-ATP and suppresses the ATPase activity of the latter (By similarity))	NA	NA	NA	NA(NA)	K4C2W3.1 PF00166.19;Cpn10;	no	no
TRINITY_DN15804_c0_g1	1139	TRINITY_DN15804_c0_g1_i1	uncharacterized protein LOC7493994 [Populus trichocarpa]	-	-	GO:0005618(cell wall);GO:0005773(vacuole);GO:0008150(biological_process)	ENOG4111WGZ(ribonuclease P MRP 25kDa)	-	-	-	-	B9H523.2 PF13462.4;Thioredoxin_4;	no	no
TRINITY_DN15807_c0_g1	1547	TRINITY_DN15807_c0_g1_i1;TRINITY_DN15807_c0_g1_i10;TRINITY_DN15807_c0_g1_i11;TRINITY_DN15807_c0_g1_i12;TRINITY_DN15807_c0_g1_i13;TRINITY_DN15807_c0_g1_i14;TRINITY_DN15807_c0_g1_i15;TRINITY_DN15807_c0_g1_i16;TRINITY_DN15807_c0_g1_i2;TRINITY_DN15807_c0_g1_i	unknown [Populus trichocarpa]	EO	2-methylene-furan-3-one reductase OS=Solanum lycopersicum GN=EO PE=1 SV=1	GO:0008270(zinc ion binding);GO:0009409(response to cold);GO:0009507(chloroplast);GO:0009570(chloroplast stroma);GO:0009579(thylakoid);GO:0009941(chloroplast envelope);GO:0010319(stromule);GO:0035671(enone reductase activity);GO:0035798(2-alkenal reductas	COG0604(alcohol dehydrogenase)	NA	NA	NA	NA(NA)	M5X5S7.1 PF08240.10;ADH_N;	no	no
TRINITY_DN15811_c0_g1	1904	TRINITY_DN15811_c0_g1_i1;TRINITY_DN15811_c0_g1_i10;TRINITY_DN15811_c0_g1_i2;TRINITY_DN15811_c0_g1_i3;TRINITY_DN15811_c0_g1_i4;TRINITY_DN15811_c0_g1_i5;TRINITY_DN15811_c0_g1_i6;TRINITY_DN15811_c0_g1_i7;TRINITY_DN15811_c0_g1_i8;TRINITY_DN15811_c0_g1_i9	cathepsin b-like protein cysteine protease, partial [Passiflora edulis]	CTSB	Cathepsin B OS=Macaca fascicularis GN=CTSB PE=2 SV=1	GO:0004197(cysteine-type endopeptidase activity);GO:0005615(extracellular space);GO:0005764(lysosome);GO:0051603(proteolysis involved in cellular protein catabolic process)	COG4870(cathepsin)	NA	NA	NA	NA(NA)	A0A067K985.1 PF00112.21;Peptidase_C1;	no	no
TRINITY_DN15840_c0_g1	5232	TRINITY_DN15840_c0_g1_i1;TRINITY_DN15840_c0_g1_i2;TRINITY_DN15840_c0_g1_i3	far upstream element-binding protein 2-like isoform X1 [Hevea brasiliensis]	FUBP3	Far upstream element-binding protein 3 OS=Homo sapiens GN=FUBP3 PE=1 SV=2	GO:0003676(nucleic acid binding);GO:0005634(nucleus);GO:0008150(biological_process)	ENOG410XZYE(Far upstream element (FUSE) binding protein)	NA	NA	NA	NA(NA)	A0A067LLH6.1 PF00013.27;KH_1;	down	yes
TRINITY_DN15852_c1_g1	1355	TRINITY_DN15852_c1_g1_i1;TRINITY_DN15852_c1_g1_i2;TRINITY_DN15852_c1_g1_i3;TRINITY_DN15852_c1_g1_i4	probable cysteine protease RD21B [Populus trichocarpa]	RD21B	Probable cysteine protease RD21B OS=Arabidopsis thaliana GN=RD21B PE=1 SV=1	GO:0004197(cysteine-type endopeptidase activity);GO:0005615(extracellular space);GO:0005764(lysosome);GO:0051603(proteolysis involved in cellular protein catabolic process)	COG4870(cathepsin)	NA	NA	NA	NA(NA)	B9R777.1 PF00112.21;Peptidase_C1;	down	yes
TRINITY_DN15852_c1_g2	1578	TRINITY_DN15852_c1_g2_i1;TRINITY_DN15852_c1_g2_i2;TRINITY_DN15852_c1_g2_i3;TRINITY_DN15852_c1_g2_i4;TRINITY_DN15852_c1_g2_i5;TRINITY_DN15852_c1_g2_i6	PREDICTED: cysteine proteinase RD21a [Populus euphratica]	RD21B	Probable cysteine protease RD21B OS=Arabidopsis thaliana GN=RD21B PE=1 SV=1	GO:0004197(cysteine-type endopeptidase activity);GO:0005615(extracellular space);GO:0005764(lysosome);GO:0051603(proteolysis involved in cellular protein catabolic process)	COG4870(cathepsin)	NA	NA	NA	NA(NA)	A9PFF7.1 PF00112.21;Peptidase_C1;	no	no
TRINITY_DN15879_c0_g1	1292	TRINITY_DN15879_c0_g1_i1	pyridoxal 5'-phosphate synthase-like subunit PDX1.2 [Populus trichocarpa]	PDX12	Pyridoxal 5'-phosphate synthase-like subunit PDX1.2 OS=Arabidopsis thaliana GN=PDX12 PE=1 SV=1	GO:0003824(catalytic activity);GO:0005515(protein binding);GO:0005737(cytoplasm);GO:0005829(cytosol);GO:0042823(pyridoxal phosphate biosynthetic process);GO:0046982(protein heterodimerization activity)	COG0214(Involved in the production of pyridoxal phosphate, probably by incorporating ammonia into the pyridine ring (By similarity))	K06215	pyridoxal 5'-phosphate synthase pdxS subunit	EC:4.3.3.6	hbr00750(Vitamin B6 metabolism)	B9GFP4.2 PF01680.15;SOR_SNZ;	no	no
TRINITY_DN15889_c1_g5	3907	TRINITY_DN15889_c1_g5_i1;TRINITY_DN15889_c1_g5_i2;TRINITY_DN15889_c1_g5_i3;TRINITY_DN15889_c1_g5_i4;TRINITY_DN15889_c1_g5_i5	protein transport protein SEC31 homolog B-like [Manihot esculenta]	SEC31B	Protein transport protein SEC31 homolog B OS=Arabidopsis thaliana GN=SEC31B PE=1 SV=1	GO:0003674(molecular_function);GO:0005737(cytoplasm);GO:0005783(endoplasmic reticulum);GO:0005794(Golgi apparatus);GO:0005829(cytosol);GO:0007029(endoplasmic reticulum organization);GO:0009506(plasmodesma);GO:0015031(protein transport);GO:0016020(membrane	ENOG410XQ1D(Component of the coat protein complex II (COPII) which promotes the formation of transport vesicles from the endoplasmic reticulum (ER). The coat has two main functions, the physical deformation of the endoplasmic reticulum membrane into vesic	K14005	protein transport protein SEC31	-	hbr04141(Protein processing in endoplasmic reticulum)	B9SPN4.1 PF12931.5;Sec16_C;	no	no
TRINITY_DN15899_c0_g5	1239	TRINITY_DN15899_c0_g5_i1;TRINITY_DN15899_c0_g5_i2	V-type proton ATPase subunit D [Jatropha curcas]	VHA-D	V-type proton ATPase subunit D OS=Arabidopsis thaliana GN=VHA-D PE=1 SV=2	GO:0000325(plant-type vacuole);GO:0005773(vacuole);GO:0005774(vacuolar membrane);GO:0005794(Golgi apparatus);GO:0005886(plasma membrane);GO:0016020(membrane);GO:0042626(ATPase activity, coupled to transmembrane movement of substances)	COG1394(Produces ATP from ADP in the presence of a proton gradient across the membrane (By similarity))	K02149	V-type H+-transporting ATPase subunit D	-	jcu00190(Oxidative phosphorylation);jcu04145(Phagosome)	W9SN12.1 PF01813.15;ATP-synt_D;	no	no
TRINITY_DN15899_c0_g2	6524	TRINITY_DN15899_c0_g2_i1;TRINITY_DN15899_c0_g2_i2	nuclear-pore anchor isoform X1 [Populus trichocarpa]	NUA	Nuclear-pore anchor OS=Arabidopsis thaliana GN=NUA PE=1 SV=1	GO:0005643(nuclear pore);GO:0006913(nucleocytoplasmic transport);GO:0007094(mitotic spindle assembly checkpoint)	ENOG410ZXZD(NA)	K09291	nucleoprotein TPR	-	ghi03013(RNA transport)	D7T103.1 PF07926.10;TPR_MLP1_2;	no	no
TRINITY_DN10883_c0_g3	1357	TRINITY_DN10883_c0_g3_i1	GDSL esterase/lipase At5g14450-like [Hevea brasiliensis]	At5g14450	GDSL esterase/lipase At5g14450 OS=Arabidopsis thaliana GN=At5g14450 PE=2 SV=1	GO:0005576(extracellular region);GO:0009505(plant-type cell wall);GO:0009506(plasmodesma);GO:0016042(lipid catabolic process);GO:0016788(hydrolase activity, acting on ester bonds);GO:0052689(carboxylic ester hydrolase activity)	ENOG4111BJN(GDSL esterase lipase)	K01206	alpha-L-fucosidase	EC:3.2.1.51	lang00511(Other glycan degradation)	B9S672.1 PF00657.20;Lipase_GDSL;	no	no
TRINITY_DN15904_c0_g2	1141	TRINITY_DN15904_c0_g2_i1;TRINITY_DN15904_c0_g2_i2;TRINITY_DN15904_c0_g2_i3;TRINITY_DN15904_c0_g2_i4;TRINITY_DN15904_c0_g2_i5	proteasome subunit alpha type-5 [Manihot esculenta]	PAE1	Proteasome subunit alpha type-5 OS=Glycine max GN=PAE1 PE=2 SV=1	GO:0000502(proteasome complex);GO:0004298(threonine-type endopeptidase activity);GO:0004540(ribonuclease activity);GO:0005634(nucleus);GO:0005737(cytoplasm);GO:0005829(cytosol);GO:0005839(proteasome core complex);GO:0006511(ubiquitin-dependent protein cat	COG0638(The proteasome is a multicatalytic proteinase complex which is characterized by its ability to cleave peptides with Arg, Phe, Tyr, Leu, and Glu adjacent to the leaving group at neutral or slightly basic pH. The proteasome has an ATP-dependent prot	K02729	20S proteasome subunit alpha 5	EC:3.4.25.1	hbr03050(Proteasome)	A0A061GJW6.1 PF00227.24;Proteasome;	no	no
TRINITY_DN15904_c0_g3	2086	TRINITY_DN15904_c0_g3_i1;TRINITY_DN15904_c0_g3_i2;TRINITY_DN15904_c0_g3_i3	hypothetical protein MANES_09G118700 [Manihot esculenta]	HEXO2	Beta-hexosaminidase 2 OS=Arabidopsis thaliana GN=HEXO2 PE=1 SV=1	GO:0004553(hydrolase activity, hydrolyzing O-glycosyl compounds);GO:0004563(beta-N-acetylhexosaminidase activity);GO:0005576(extracellular region);GO:0005886(plasma membrane);GO:0005975(carbohydrate metabolic process);GO:0015929(hexosaminidase activity);G	COG3525(ec 3.2.1.52)	K12373	hexosaminidase	EC:3.2.1.52	hbr00520(Amino sugar and nucleotide sugar metabolism);hbr00531(Glycosaminoglycan degradation);hbr00603(Glycosphingolipid biosynthesis - globo and isoglobo series);hbr00604(Glycosphingolipid biosynthesis - ganglio series);hbr00511(Other glycan degradation)	B9N6K4.1 PF00728.20;Glyco_hydro_20;	no	no
TRINITY_DN15905_c0_g2	2595	TRINITY_DN15905_c0_g2_i1;TRINITY_DN15905_c0_g2_i2	uncharacterized protein LOC110617626 [Manihot esculenta]	-	-	GO:0003674(molecular_function);GO:0005773(vacuole);GO:0008150(biological_process);GO:0009507(chloroplast)	ENOG4111H2B(Stress up-regulated Nod 19)	-	-	-	-	B9ICC3.2 PF07712.10;SURNod19;	no	no
TRINITY_DN15912_c0_g1	2240	TRINITY_DN15912_c0_g1_i1;TRINITY_DN15912_c0_g1_i2;TRINITY_DN15912_c0_g1_i3;TRINITY_DN15912_c0_g1_i4;TRINITY_DN15912_c0_g1_i5;TRINITY_DN15912_c0_g1_i6;TRINITY_DN15912_c0_g1_i7;TRINITY_DN15912_c0_g1_i8	dihydrolipoyl dehydrogenase 1, mitochondrial [Jatropha curcas]	LPD1	Dihydrolipoyl dehydrogenase 1, mitochondrial OS=Arabidopsis thaliana GN=LPD1 PE=1 SV=2	GO:0004148(dihydrolipoyl dehydrogenase activity);GO:0005507(copper ion binding);GO:0005524(ATP binding);GO:0005739(mitochondrion);GO:0005747(mitochondrial respiratory chain complex I);GO:0005759(mitochondrial matrix);GO:0005794(Golgi apparatus);GO:0008270	COG1249(dihydrolipoyl dehydrogenase)	K00382	dihydrolipoamide dehydrogenase	EC:1.8.1.4	jcu00010(Glycolysis / Gluconeogenesis);jcu00020(Citrate cycle (TCA cycle));jcu00620(Pyruvate metabolism);jcu00630(Glyoxylate and dicarboxylate metabolism);jcu00640(Propanoate metabolism);jcu00260(Glycine, serine and threonine metabolism);jcu00280(Valine,	A0A067JVH4.1 PF07992.12;Pyr_redox_2;	no	no
TRINITY_DN15929_c0_g3	1379	TRINITY_DN15929_c0_g3_i1;TRINITY_DN15929_c0_g3_i2;TRINITY_DN15929_c0_g3_i3;TRINITY_DN15929_c0_g3_i4	ATP-dependent Clp protease proteolytic subunit 2, mitochondrial [Populus trichocarpa]	CLPP2	ATP-dependent Clp protease proteolytic subunit 2, mitochondrial OS=Arabidopsis thaliana GN=CLPP2 PE=1 SV=1	GO:0004252(serine-type endopeptidase activity);GO:0005739(mitochondrion);GO:0005759(mitochondrial matrix);GO:0006508(proteolysis);GO:0008270(zinc ion binding);GO:0009532(plastid stroma);GO:0009535(chloroplast thylakoid membrane);GO:0009570(chloroplast str	COG0740(Cleaves peptides in various proteins in a process that requires ATP hydrolysis. Has a chymotrypsin-like activity. Plays a major role in the degradation of misfolded proteins (By similarity))	NA	NA	NA	NA(NA)	V4KWW3.1 PF00574.21;CLP_protease;	no	no
TRINITY_DN15929_c0_g8	749	TRINITY_DN15929_c0_g8_i1	ATP-dependent Clp protease proteolytic subunit 2, mitochondrial [Vitis vinifera]	CLPP2	ATP-dependent Clp protease proteolytic subunit 2, mitochondrial OS=Arabidopsis thaliana GN=CLPP2 PE=1 SV=1	GO:0004252(serine-type endopeptidase activity);GO:0005739(mitochondrion);GO:0005759(mitochondrial matrix);GO:0006508(proteolysis);GO:0008270(zinc ion binding);GO:0009532(plastid stroma);GO:0009535(chloroplast thylakoid membrane);GO:0009570(chloroplast str	COG0740(Cleaves peptides in various proteins in a process that requires ATP hydrolysis. Has a chymotrypsin-like activity. Plays a major role in the degradation of misfolded proteins (By similarity))	NA	NA	NA	NA(NA)	V4KWW3.1 PF00574.21;CLP_protease;	no	no
TRINITY_DN15935_c1_g3	1178	TRINITY_DN15935_c1_g3_i1;TRINITY_DN15935_c1_g3_i2	CDGSH iron-sulfur domain-containing protein NEET [Hevea brasiliensis]	NEET	CDGSH iron-sulfur domain-containing protein NEET OS=Arabidopsis thaliana GN=NEET PE=1 SV=1	GO:0005739(mitochondrion);GO:0009507(chloroplast);GO:0009570(chloroplast stroma);GO:0010150(leaf senescence);GO:0046872(metal ion binding);GO:0051537(2 iron, 2 sulfur cluster binding);GO:0055072(iron ion homeostasis);GO:0072593(reactive oxygen species met	ENOG41122II(CDGSH iron sulfur domain)	-	-	-	-	A0A067JHV2.1 PF09360.8;zf-CDGSH;	no	no
TRINITY_DN15947_c0_g3	745	TRINITY_DN15947_c0_g3_i1;TRINITY_DN15947_c0_g3_i2;TRINITY_DN15947_c0_g3_i3;TRINITY_DN15947_c0_g3_i4;TRINITY_DN15947_c0_g3_i5	uncharacterized protein LOC105174340 [Sesamum indicum]	SDR1	(+)-neomenthol dehydrogenase OS=Arabidopsis thaliana GN=SDR1 PE=1 SV=1	GO:0005737(cytoplasm);GO:0009505(plant-type cell wall);GO:0016491(oxidoreductase activity)	COG1028(Dehydrogenase reductase)	K15095	(+)-neomenthol dehydrogenase	EC:1.1.1.208	sind00902(Monoterpenoid biosynthesis)	A0A0D2TC95.1 PF13561.4;adh_short_C2;	no	no
TRINITY_DN15956_c1_g3	774	TRINITY_DN15956_c1_g3_i1	17.3 kDa class I heat shock protein [Jatropha curcas]	HSP17.5-M	17.5 kDa class I heat shock protein OS=Glycine max GN=HSP17.5-M PE=3 SV=1	GO:0003674(molecular_function);GO:0005737(cytoplasm);GO:0006979(response to oxidative stress);GO:0009408(response to heat);GO:0009644(response to high light intensity);GO:0042542(response to hydrogen peroxide)	COG0071(response to heat)	K13993	HSP20 family protein	-	jcu04141(Protein processing in endoplasmic reticulum)	C6SXG1.1 PF00011.19;HSP20;	no	no
TRINITY_DN15979_c0_g1	1282	TRINITY_DN15979_c0_g1_i1;TRINITY_DN15979_c0_g1_i10;TRINITY_DN15979_c0_g1_i11;TRINITY_DN15979_c0_g1_i12;TRINITY_DN15979_c0_g1_i13;TRINITY_DN15979_c0_g1_i14;TRINITY_DN15979_c0_g1_i15;TRINITY_DN15979_c0_g1_i16;TRINITY_DN15979_c0_g1_i2;TRINITY_DN15979_c0_g1_i	PREDICTED: glucose and ribitol dehydrogenase-like [Populus euphratica]	CAISE5	Glucose and ribitol dehydrogenase OS=Daucus carota GN=CAISE5 PE=2 SV=1	GO:0009507(chloroplast);GO:0016491(oxidoreductase activity);GO:0055114(oxidation-reduction process)	COG1028(Dehydrogenase reductase)	K13237	peroxisomal 2,4-dienoyl-CoA reductase	EC:1.3.1.34	han04146(Peroxisome)	A0A067L6K5.1 PF13561.4;adh_short_C2;	no	no
TRINITY_DN10893_c0_g8	1189	TRINITY_DN10893_c0_g8_i1;TRINITY_DN10893_c0_g8_i2;TRINITY_DN10893_c0_g8_i3;TRINITY_DN10893_c0_g8_i4	PREDICTED: protein SPIRAL1-like 1 [Juglans regia]	SP1L1	Protein SPIRAL1-like 1 OS=Arabidopsis thaliana GN=SP1L1 PE=2 SV=1	GO:0005874(microtubule);GO:0005886(plasma membrane)	ENOG410XU77(in maintaining the cortical microtubules organization essential for anisotropic cell growth)	NA	NA	NA	NA(NA)	-	no	no
TRINITY_DN15995_c0_g2	1297	TRINITY_DN15995_c0_g2_i1;TRINITY_DN15995_c0_g2_i2;TRINITY_DN15995_c0_g2_i3;TRINITY_DN15995_c0_g2_i4;TRINITY_DN15995_c0_g2_i5;TRINITY_DN15995_c0_g2_i6	(+)-neomenthol dehydrogenase [Populus trichocarpa]	SALR	Salutaridine reductase OS=Papaver bracteatum GN=SALR PE=1 SV=1	GO:0047037(salutaridine reductase (NADPH) activity);GO:0050661(NADP binding);GO:0097295(morphine biosynthetic process)	COG1028(Dehydrogenase reductase)	K15095	(+)-neomenthol dehydrogenase	EC:1.1.1.208	hbr00902(Monoterpenoid biosynthesis)	B9GPY4.1 PF00106.23;adh_short;	no	no
TRINITY_DN10894_c0_g2	994	TRINITY_DN10894_c0_g2_i1	50S ribosomal protein L11, chloroplastic [Populus trichocarpa]	RPL11	50S ribosomal protein L11, chloroplastic OS=Arabidopsis thaliana GN=RPL11 PE=2 SV=1	GO:0000027(ribosomal large subunit assembly);GO:0003735(structural constituent of ribosome);GO:0005762(mitochondrial large ribosomal subunit);GO:0006412(translation);GO:0019843(rRNA binding)	COG0080(This protein binds directly to 23S ribosomal RNA (By similarity))	K02867	large subunit ribosomal protein L11	-	jcu03010(Ribosome)	B9RYX3.1 PF00298.17;Ribosomal_L11;	no	no
TRINITY_DN16019_c1_g4	1829	TRINITY_DN16019_c1_g4_i1	3-oxoacyl-[acyl-carrier-protein] synthase I, chloroplastic [Populus trichocarpa]	KAS1	3-oxoacyl-[acyl-carrier-protein] synthase I, chloroplastic OS=Arabidopsis thaliana GN=KAS1 PE=1 SV=2	GO:0004312(fatty acid synthase activity);GO:0004315(3-oxoacyl-[acyl-carrier-protein] synthase activity);GO:0006633(fatty acid biosynthetic process);GO:0006636(unsaturated fatty acid biosynthetic process);GO:0009507(chloroplast);GO:0009536(plastid);GO:0009	COG0304(Catalyzes the condensation reaction of fatty acid synthesis by the addition to an acyl acceptor of two carbons from malonyl-ACP (By similarity))	K09458	3-oxoacyl-[acyl-carrier-protein] synthase II	EC:2.3.1.179	rcu00061(Fatty acid biosynthesis);rcu00780(Biotin metabolism)	A0A078CKD1.1 PF00109.24;ketoacyl-synt;	no	no
TRINITY_DN16032_c0_g1	1545	TRINITY_DN16032_c0_g1_i1;TRINITY_DN16032_c0_g1_i10;TRINITY_DN16032_c0_g1_i2;TRINITY_DN16032_c0_g1_i3;TRINITY_DN16032_c0_g1_i4;TRINITY_DN16032_c0_g1_i5;TRINITY_DN16032_c0_g1_i6;TRINITY_DN16032_c0_g1_i7;TRINITY_DN16032_c0_g1_i8;TRINITY_DN16032_c0_g1_i9	basic 7S globulin [Ricinus communis]	BG	Basic 7S globulin OS=Glycine max GN=BG PE=1 SV=2	GO:0004190(aspartic-type endopeptidase activity);GO:0006508(proteolysis);GO:0030163(protein catabolic process)	ENOG410XNV7(aspartic)	-	-	-	-	B9RTV5.1 PF14543.4;TAXi_N;	no	no
TRINITY_DN16035_c0_g5	953	TRINITY_DN16035_c0_g5_i1;TRINITY_DN16035_c0_g5_i2	selenoprotein H-like [Hevea brasiliensis]	-	-	GO:0005634(nucleus)	ENOG4112AU7(NA)	-	-	-	-	A0A022QR24.1 PF10262.7;Rdx;	no	no
TRINITY_DN16039_c0_g2	1034	TRINITY_DN16039_c0_g2_i1;TRINITY_DN16039_c0_g2_i2;TRINITY_DN16039_c0_g2_i3	Ribosomal protein L5 [Corchorus olitorius]	RPL5	50S ribosomal protein L5, chloroplastic OS=Arabidopsis thaliana GN=RPL5 PE=2 SV=1	GO:0000027(ribosomal large subunit assembly);GO:0003735(structural constituent of ribosome);GO:0006412(translation);GO:0022625(cytosolic large ribosomal subunit)	COG0094(This is 1 of the proteins that binds and probably mediates the attachment of the 5S RNA into the large ribosomal subunit, where it forms part of the central protuberance. In the 70S ribosome it contacts protein S13 of the 30S subunit (bridge B1b),	K02931	large subunit ribosomal protein L5	-	hbr03010(Ribosome)	A0A0D2QR65.1 PF00673.19;Ribosomal_L5_C;	no	no
TRINITY_DN16049_c0_g3	1100	TRINITY_DN16049_c0_g3_i1	hypothetical protein DVH24_042367 [Malus domestica]	-	Isoflavone reductase homolog OS=Solanum tuberosum PE=2 SV=1	GO:0005737(cytoplasm);GO:0009807(lignan biosynthetic process);GO:0032442(phenylcoumaran benzylic ether reductase activity);GO:0046686(response to cadmium ion);GO:0050664(oxidoreductase activity, acting on NAD(P)H, oxygen as acceptor);GO:0055114(oxidation-	ENOG410Y0DY(Isoflavone reductase)	NA	NA	NA	NA(NA)	M5VMM7.1 PF05368.11;NmrA;	no	no
TRINITY_DN16096_c0_g2	2975	TRINITY_DN16096_c0_g2_i1;TRINITY_DN16096_c0_g2_i2;TRINITY_DN16096_c0_g2_i3;TRINITY_DN16096_c0_g2_i4;TRINITY_DN16096_c0_g2_i5;TRINITY_DN16096_c0_g2_i6;TRINITY_DN16096_c0_g2_i7;TRINITY_DN16096_c0_g2_i8	elongation factor 2 [Hevea brasiliensis]	LOS1	Elongation factor 2 OS=Arabidopsis thaliana GN=LOS1 PE=1 SV=1	GO:0003924(GTPase activity);GO:0005622(intracellular);GO:0006412(translation)	COG0480(Catalyzes the GTP-dependent ribosomal translocation step during translation elongation. During this step, the ribosome changes from the pre-translocational (PRE) to the post- translocational (POST) state as the newly formed A-site-bound peptidyl-t	NA	NA	NA	NA(NA)	R0GL75.1 PF00009.25;GTP_EFTU;	no	no
TRINITY_DN16118_c0_g4	834	TRINITY_DN16118_c0_g4_i1;TRINITY_DN16118_c0_g4_i2	embryo-specific protein ATS3A isoform X1 [Citrus sinensis]	ATS3A	Embryo-specific protein ATS3A OS=Arabidopsis thaliana GN=ATS3A PE=1 SV=1	GO:0005515(protein binding);GO:0005576(extracellular region);GO:0008150(biological_process);GO:0009506(plasmodesma)	ENOG410YRBB(Embryo-specific protein 3, (ATS3))	-	-	-	-	B9SES4.1 PF06232.9;ATS3;	no	no
TRINITY_DN16124_c0_g1	3445	TRINITY_DN16124_c0_g1_i1;TRINITY_DN16124_c0_g1_i2;TRINITY_DN16124_c0_g1_i3;TRINITY_DN16124_c0_g1_i4;TRINITY_DN16124_c0_g1_i5;TRINITY_DN16124_c0_g1_i6;TRINITY_DN16124_c0_g1_i7;TRINITY_DN16124_c0_g1_i8	dynamin-2A-like [Manihot esculenta]	DRP2A	Dynamin-2A OS=Arabidopsis thaliana GN=DRP2A PE=1 SV=2	GO:0000139(Golgi membrane);GO:0000266(mitochondrial fission);GO:0003924(GTPase activity);GO:0005525(GTP binding);GO:0005737(cytoplasm);GO:0005774(vacuolar membrane);GO:0005794(Golgi apparatus);GO:0005829(cytosol);GO:0005874(microtubule);GO:0005886(plasma	COG0699(Dynamin family)	K01528	dynamin GTPase	EC:3.6.5.5	hbr04144(Endocytosis)	W9SHM5.1 PF01031.18;Dynamin_M;	no	no
TRINITY_DN16129_c0_g2	1609	TRINITY_DN16129_c0_g2_i1;TRINITY_DN16129_c0_g2_i2;TRINITY_DN16129_c0_g2_i3;TRINITY_DN16129_c0_g2_i4;TRINITY_DN16129_c0_g2_i5;TRINITY_DN16129_c0_g2_i6	chitinase 2 [Populus x canadensis]	CHIA	Acidic mammalian chitinase OS=Bos taurus GN=CHIA PE=1 SV=1	GO:0004568(chitinase activity);GO:0005576(extracellular region);GO:0006032(chitin catabolic process);GO:0008061(chitin binding)	COG3325(chitinase)	K01183	chitinase	EC:3.2.1.14	rcu00520(Amino sugar and nucleotide sugar metabolism)	B9HAQ4.1 PF00704.26;Glyco_hydro_18;	no	no
TRINITY_DN16132_c1_g4	4619	TRINITY_DN16132_c1_g4_i1;TRINITY_DN16132_c1_g4_i2	enhancer of mRNA-decapping protein 4-like isoform X1 [Hevea brasiliensis]	VCS	Enhancer of mRNA-decapping protein 4 OS=Arabidopsis thaliana GN=VCS PE=1 SV=1	GO:0000166(nucleotide binding);GO:0000932(P-body);GO:0003729(mRNA binding);GO:0005515(protein binding);GO:0005634(nucleus);GO:0005829(cytosol);GO:0006397(mRNA processing);GO:0006402(mRNA catabolic process);GO:0009791(post-embryonic development);GO:0009965	ENOG410XP6V(Enhancer of mRNA decapping 4)	K12616	enhancer of mRNA-decapping protein 4	-	hbr03018(RNA degradation)	A0A067K941.1 PF16529.3;Ge1_WD40;	no	no
TRINITY_DN16147_c0_g5	1158	TRINITY_DN16147_c0_g5_i1;TRINITY_DN16147_c0_g5_i2	zinc finger CCCH domain-containing protein 44-like [Manihot esculenta]	TRI1	Protein TRI1 OS=Saccharomyces cerevisiae (strain ATCC 204508 / S288c) GN=TRI1 PE=1 SV=1	GO:0003674(molecular_function);GO:0005634(nucleus);GO:0008150(biological_process)	COG5531(SWI SNF related, matrix associated, actin dependent regulator of chromatin, subfamily d, member)	NA	NA	NA	NA(NA)	B9RY66.1 PF02201.16;SWIB;	no	no
TRINITY_DN10911_c0_g5	1676	TRINITY_DN10911_c0_g5_i1	succinate dehydrogenase subunit 5, mitochondrial [Populus trichocarpa]	SDH5	Succinate dehydrogenase subunit 5, mitochondrial OS=Arabidopsis thaliana GN=SDH5 PE=1 SV=1	GO:0003674(molecular_function);GO:0005634(nucleus);GO:0005739(mitochondrion);GO:0005749(mitochondrial respiratory chain complex II, succinate dehydrogenase complex (ubiquinone));GO:0006099(tricarboxylic acid cycle);GO:0009735(response to cytokinin);GO:004	ENOG4111Y8T(NA)	-	-	-	-	A9P908.1 PF14290.4;DUF4370;	up	yes
TRINITY_DN16168_c0_g3	3116	TRINITY_DN16168_c0_g3_i1;TRINITY_DN16168_c0_g3_i2;TRINITY_DN16168_c0_g3_i3;TRINITY_DN16168_c0_g3_i4;TRINITY_DN16168_c0_g3_i5	heat shock 70 kDa protein 15-like [Ziziphus jujuba]	HSP70-14	Heat shock 70 kDa protein 14 OS=Arabidopsis thaliana GN=HSP70-14 PE=2 SV=1	GO:0005515(protein binding);GO:0005524(ATP binding);GO:0005634(nucleus);GO:0005737(cytoplasm);GO:0005829(cytosol);GO:0005886(plasma membrane);GO:0006457(protein folding);GO:0009408(response to heat);GO:0046686(response to cadmium ion)	COG0443(Heat shock protein)	NA	NA	NA	NA(NA)	B9SQC9.1 PF00012.18;HSP70;	no	no
TRINITY_DN16175_c1_g1	1350	TRINITY_DN16175_c1_g1_i1;TRINITY_DN16175_c1_g1_i2;TRINITY_DN16175_c1_g1_i3;TRINITY_DN16175_c1_g1_i4;TRINITY_DN16175_c1_g1_i5	polyadenylate-binding protein-interacting protein 6 [Jatropha curcas]	CID5	Polyadenylate-binding protein-interacting protein 5 OS=Arabidopsis thaliana GN=CID5 PE=2 SV=1	GO:0005515(protein binding);GO:0005634(nucleus);GO:0008150(biological_process)	ENOG41114K2(NA)	-	-	-	-	A0A059CRC5.1 PF02845.14;CUE;	up	yes
TRINITY_DN16180_c0_g7	3155	TRINITY_DN16180_c0_g7_i1	PREDICTED: chaperone protein ClpB1 [Populus euphratica]	CLPB1	Chaperone protein ClpB1 OS=Arabidopsis thaliana GN=CLPB1 PE=1 SV=2	GO:0005515(protein binding);GO:0005524(ATP binding);GO:0005634(nucleus);GO:0005737(cytoplasm);GO:0005829(cytosol);GO:0009408(response to heat);GO:0009570(chloroplast stroma);GO:0009644(response to high light intensity);GO:0009941(chloroplast envelope);GO:	COG0542(ATP-dependent CLP protease ATP-binding subunit)	NA	NA	NA	NA(NA)	B9RLP7.1 PF07724.12;AAA_2;	no	no
TRINITY_DN16186_c0_g1	4379	TRINITY_DN16186_c0_g1_i1;TRINITY_DN16186_c0_g1_i10;TRINITY_DN16186_c0_g1_i11;TRINITY_DN16186_c0_g1_i12;TRINITY_DN16186_c0_g1_i13;TRINITY_DN16186_c0_g1_i14;TRINITY_DN16186_c0_g1_i15;TRINITY_DN16186_c0_g1_i2;TRINITY_DN16186_c0_g1_i3;TRINITY_DN16186_c0_g1_i4	putative LOV domain-containing protein [Passiflora caerulea]	PHOT2	Phototropin-2 OS=Arabidopsis thaliana GN=PHOT2 PE=1 SV=2	GO:0004674(protein serine/threonine kinase activity);GO:0005634(nucleus);GO:0005737(cytoplasm);GO:0005886(plasma membrane);GO:0035556(intracellular signal transduction)	COG2202(Histidine kinase)	NA	NA	NA	NA(NA)	A0A067LQ39.1 PF00069.23;Pkinase;	no	no
TRINITY_DN16196_c0_g5	741	TRINITY_DN16196_c0_g5_i1	WPP domain-containing protein 1-like [Hevea brasiliensis]	MAF1	MFP1 attachment factor 1 OS=Solanum lycopersicum GN=MAF1 PE=1 SV=1	GO:0005515(protein binding)	ENOG410YXFU(MFP1 attachment factor)	K14319	Ran GTPase-activating protein 1	-	egr03013(RNA transport)	A0A067LAZ8.1 PF13943.4;WPP;	no	no
TRINITY_DN16200_c0_g1	2003	TRINITY_DN16200_c0_g1_i1;TRINITY_DN16200_c0_g1_i2;TRINITY_DN16200_c0_g1_i3	PREDICTED: THO complex subunit 4B-like [Populus euphratica]	ALY1	THO complex subunit 4A OS=Arabidopsis thaliana GN=ALY1 PE=1 SV=1	GO:0003676(nucleic acid binding);GO:0003729(mRNA binding);GO:0005515(protein binding);GO:0005654(nucleoplasm);GO:0051028(mRNA transport)	ENOG4111JAW(Polymerase (DNA-directed), delta interacting protein 3)	K12881	THO complex subunit 4	-	tcc03040(Spliceosome);tcc03013(RNA transport);tcc03015(mRNA surveillance pathway)	U5FKQ8.1 PF00076.20;RRM_1;	no	no
TRINITY_DN16213_c0_g2	2138	TRINITY_DN16213_c0_g2_i1;TRINITY_DN16213_c0_g2_i2	PREDICTED: ricin-like [Elaeis guineensis]	-	Ricin OS=Ricinus communis PE=1 SV=1	GO:0005515(protein binding);GO:0005783(endoplasmic reticulum);GO:0031640(killing of cells of other organism)	-	-	-	-	-	I3V672.1 PF00161.17;RIP;	down	yes
TRINITY_DN16230_c0_g1	5481	TRINITY_DN16230_c0_g1_i1;TRINITY_DN16230_c0_g1_i10;TRINITY_DN16230_c0_g1_i11;TRINITY_DN16230_c0_g1_i12;TRINITY_DN16230_c0_g1_i13;TRINITY_DN16230_c0_g1_i14;TRINITY_DN16230_c0_g1_i2;TRINITY_DN16230_c0_g1_i3;TRINITY_DN16230_c0_g1_i4;TRINITY_DN16230_c0_g1_i5;	uncharacterized protein LOC7489624 isoform X1 [Populus trichocarpa]	-	-	GO:0003674(molecular_function);GO:0005634(nucleus);GO:0008150(biological_process)	ENOG4111MW7(PWWP domaincontaining protein)	K17398	DNA (cytosine-5)-methyltransferase 3A	EC:2.1.1.37	mdm00270(Cysteine and methionine metabolism)	F6HNK4.1 PF00855.15;PWWP;	no	no
TRINITY_DN16244_c0_g2	1757	TRINITY_DN16244_c0_g2_i1;TRINITY_DN16244_c0_g2_i2;TRINITY_DN16244_c0_g2_i3;TRINITY_DN16244_c0_g2_i4;TRINITY_DN16244_c0_g2_i5;TRINITY_DN16244_c0_g2_i6	PREDICTED: uncharacterized protein LOC100247377 [Vitis vinifera]	IRC24	Benzil reductase ((S)-benzoin forming) IRC24 OS=Saccharomyces cerevisiae (strain ATCC 204508 / S288c) GN=IRC24 PE=1 SV=1	GO:0009507(chloroplast);GO:0016491(oxidoreductase activity);GO:0055114(oxidation-reduction process)	ENOG4111VKY(Dehydrogenase)	-	-	-	-	D7TKS1.1 PF00106.23;adh_short;	no	no
TRINITY_DN16252_c0_g1	2104	TRINITY_DN16252_c0_g1_i1;TRINITY_DN16252_c0_g1_i2;TRINITY_DN16252_c0_g1_i3;TRINITY_DN16252_c0_g1_i4;TRINITY_DN16252_c0_g1_i5	PREDICTED: aldehyde dehydrogenase family 2 member B4, mitochondrial-like [Populus euphratica]	ALDH2B4	Aldehyde dehydrogenase family 2 member B4, mitochondrial OS=Arabidopsis thaliana GN=ALDH2B4 PE=2 SV=1	GO:0004029(aldehyde dehydrogenase (NAD) activity)	COG1012(Dehydrogenase)	K00128	aldehyde dehydrogenase (NAD+)	EC:1.2.1.3	egr00010(Glycolysis / Gluconeogenesis);egr00053(Ascorbate and aldarate metabolism);egr00620(Pyruvate metabolism);egr00071(Fatty acid degradation);egr00561(Glycerolipid metabolism);egr00280(Valine, leucine and isoleucine degradation);egr00310(Lysine degrad	A0A059CZ25.1 PF00171.20;Aldedh;	no	no
TRINITY_DN16260_c0_g1	874	TRINITY_DN16260_c0_g1_i1	uncharacterized protein LOC105629456 [Jatropha curcas]	-	-	GO:0003674(molecular_function);GO:0005634(nucleus);GO:0008150(biological_process)	ENOG410ZDFZ(BEST Arabidopsis thaliana protein match is oxidoreductase, acting on NADH or NADPH (TAIR AT1G75260.1))	-	-	-	-	-	no	no
TRINITY_DN16269_c0_g1	3675	TRINITY_DN16269_c0_g1_i1;TRINITY_DN16269_c0_g1_i2;TRINITY_DN16269_c0_g1_i3;TRINITY_DN16269_c0_g1_i4;TRINITY_DN16269_c0_g1_i5;TRINITY_DN16269_c0_g1_i6	26S proteasome non-ATPase regulatory subunit 1 homolog A [Populus trichocarpa]	RPN2A	26S proteasome non-ATPase regulatory subunit 1 homolog A OS=Arabidopsis thaliana GN=RPN2A PE=1 SV=1	GO:0004175(endopeptidase activity);GO:0005634(nucleus);GO:0008540(proteasome regulatory particle, base subcomplex);GO:0034515(proteasome storage granule);GO:0043161(proteasome-mediated ubiquitin-dependent protein catabolic process)	COG5116(26s proteasome)	K03032	26S proteasome regulatory subunit N2	-	hbr03050(Proteasome)	I1QGL9.1 PF13646.4;HEAT_2;	no	no
TRINITY_DN16278_c1_g2	1059	TRINITY_DN16278_c1_g2_i1;TRINITY_DN16278_c1_g2_i2;TRINITY_DN16278_c1_g2_i3	endochitinase [Ricinus communis]	CHI2	Endochitinase A2 OS=Pisum sativum GN=CHI2 PE=1 SV=2	GO:0004568(chitinase activity);GO:0050832(defense response to fungus)	COG3979(chitinase)	K20547	basic endochitinase B	EC:3.2.1.14	rcu00520(Amino sugar and nucleotide sugar metabolism);rcu04016(MAPK signaling pathway - plant)	B9SIC4.1 PF00182.17;Glyco_hydro_19;	no	no
TRINITY_DN16292_c0_g5	1704	TRINITY_DN16292_c0_g5_i1	6-phosphogluconate dehydrogenase, putative [Ricinus communis]	At5g41670	6-phosphogluconate dehydrogenase, decarboxylating 2, chloroplastic OS=Arabidopsis thaliana GN=At5g41670 PE=1 SV=1	GO:0004616(phosphogluconate dehydrogenase (decarboxylating) activity);GO:0005515(protein binding);GO:0005737(cytoplasm);GO:0005739(mitochondrion);GO:0005829(cytosol);GO:0008114(phosphogluconate 2-dehydrogenase activity);GO:0009051(pentose-phosphate shunt,	COG0362(Catalyzes the oxidative decarboxylation of 6- phosphogluconate to ribulose 5-phosphate and CO(2), with concomitant reduction of NADP to NADPH (By similarity))	K00033	6-phosphogluconate dehydrogenase	EC:1.1.1.44 1.1.1.343	hbr00030(Pentose phosphate pathway);hbr00480(Glutathione metabolism)	B9GL99.1 PF00393.17;6PGD;	no	no
TRINITY_DN10925_c0_g2	1806	TRINITY_DN10925_c0_g2_i1;TRINITY_DN10925_c0_g2_i2;TRINITY_DN10925_c0_g2_i3;TRINITY_DN10925_c0_g2_i4;TRINITY_DN10925_c0_g2_i5;TRINITY_DN10925_c0_g2_i6	oxygen-evolving enhancer protein 1, chloroplastic [Ziziphus jujuba]	PSBO	Oxygen-evolving enhancer protein 1, chloroplastic OS=Nicotiana tabacum GN=PSBO PE=2 SV=1	GO:0005509(calcium ion binding);GO:0005515(protein binding);GO:0008266(poly(U) RNA binding);GO:0009507(chloroplast);GO:0009534(chloroplast thylakoid);GO:0009535(chloroplast thylakoid membrane);GO:0009543(chloroplast thylakoid lumen);GO:0009570(chloroplast	ENOG410XP4G(photosystem II manganese-stabilizing)	K02716	photosystem II oxygen-evolving enhancer protein 1	-	zju00195(Photosynthesis)	A0A0B0NFV8.1 PF01716.16;MSP;	down	yes
TRINITY_DN16328_c1_g1	1368	TRINITY_DN16328_c1_g1_i1;TRINITY_DN16328_c1_g1_i10;TRINITY_DN16328_c1_g1_i11;TRINITY_DN16328_c1_g1_i2;TRINITY_DN16328_c1_g1_i3;TRINITY_DN16328_c1_g1_i4;TRINITY_DN16328_c1_g1_i5;TRINITY_DN16328_c1_g1_i6;TRINITY_DN16328_c1_g1_i7;TRINITY_DN16328_c1_g1_i8;TRI	class i chitinase, partial [Passiflora edulis]	CHIA1	Endochitinase 1 OS=Theobroma cacao GN=CHIA1 PE=2 SV=1	GO:0004568(chitinase activity);GO:0005576(extracellular region);GO:0008061(chitin binding);GO:0016998(cell wall macromolecule catabolic process);GO:0050832(defense response to fungus)	COG3979(chitinase)	K20547	basic endochitinase B	EC:3.2.1.14	zju00520(Amino sugar and nucleotide sugar metabolism);zju04016(MAPK signaling pathway - plant)	W9RHR3.1 PF00187.17;Chitin_bind_1;	no	no
TRINITY_DN10927_c0_g5	1770	TRINITY_DN10927_c0_g5_i1	indole-3-glycerol phosphate synthase, chloroplastic [Herrania umbratica]	IGPS	Indole-3-glycerol phosphate synthase, chloroplastic OS=Arabidopsis thaliana GN=IGPS PE=1 SV=2	GO:0000162(tryptophan biosynthetic process);GO:0004425(indole-3-glycerol-phosphate synthase activity);GO:0004640(phosphoribosylanthranilate isomerase activity)	COG0134(indole-3-glycerol phosphate synthase)	K01609	indole-3-glycerol phosphate synthase	EC:4.1.1.48	ghi00400(Phenylalanine, tyrosine and tryptophan biosynthesis)	A0A0D2QSM4.1 PF00218.19;IGPS;	no	no
TRINITY_DN16334_c1_g2	3803	TRINITY_DN16334_c1_g2_i1;TRINITY_DN16334_c1_g2_i2;TRINITY_DN16334_c1_g2_i3;TRINITY_DN16334_c1_g2_i4;TRINITY_DN16334_c1_g2_i5;TRINITY_DN16334_c1_g2_i6;TRINITY_DN16334_c1_g2_i7	glycine dehydrogenase (decarboxylating), mitochondrial [Jatropha curcas]	GDCSP	Glycine dehydrogenase (decarboxylating), mitochondrial OS=Solanum tuberosum GN=GDCSP PE=2 SV=1	GO:0004375(glycine dehydrogenase (decarboxylating) activity);GO:0005739(mitochondrion);GO:0005829(cytosol);GO:0005960(glycine cleavage complex);GO:0016594(glycine binding);GO:0019464(glycine decarboxylation via glycine cleavage system)	COG0403(The glycine cleavage system catalyzes the degradation of glycine. The P protein binds the alpha-amino group of glycine through its pyridoxal phosphate cofactor);COG1003(The glycine cleavage system catalyzes the degradation of glycine. The P protei	K00281	glycine dehydrogenase	EC:1.4.4.2	jcu00630(Glyoxylate and dicarboxylate metabolism);jcu00260(Glycine, serine and threonine metabolism)	W9RBP3.1 PF02347.14;GDC-P;	no	no
TRINITY_DN16337_c2_g1	10014	TRINITY_DN16337_c2_g1_i1;TRINITY_DN16337_c2_g1_i2	hypothetical protein, partial [Plantago major]	-	Genome polyprotein OS=Soybean mosaic virus (strain N) PE=1 SV=2	GO:0005515(protein binding)	-	-	-	-	-	P18247.2 PF00680.18;RdRP_1;	no	no
TRINITY_DN16341_c0_g3	666	TRINITY_DN16341_c0_g3_i1	GDP-mannose 3,5-epimerase 1 isoform X3 [Amborella trichopoda]	GME-2	GDP-mannose 3,5-epimerase 2 OS=Oryza sativa subsp. japonica GN=GME-2 PE=2 SV=2	GO:0003824(catalytic activity);GO:0005737(cytoplasm);GO:0005829(cytosol);GO:0009225(nucleotide-sugar metabolic process);GO:0019853(L-ascorbic acid biosynthetic process);GO:0047918(GDP-mannose 3,5-epimerase activity);GO:0051287(NAD binding)	COG0451(Nad-dependent epimerase dehydratase)	K10046	GDP-D-mannose 3', 5'-epimerase	EC:5.1.3.18 5.1.3.-	atr00053(Ascorbate and aldarate metabolism);atr00520(Amino sugar and nucleotide sugar metabolism)	R5J3J9.1 PF16363.3;GDP_Man_Dehyd;	no	no
TRINITY_DN16349_c0_g1	872	TRINITY_DN16349_c0_g1_i1;TRINITY_DN16349_c0_g1_i2;TRINITY_DN16349_c0_g1_i3	hypothetical protein B456_006G060200 [Gossypium raimondii]	RPS7	40S ribosomal protein S7 OS=Avicennia marina GN=RPS7 PE=2 SV=1	GO:0006364(rRNA processing);GO:0022627(cytosolic small ribosomal subunit);GO:0030686(90S preribosome);GO:0032040(small-subunit processome);GO:0042274(ribosomal small subunit biogenesis)	ENOG410ZYKB(ribosomal protein S7)	K02993	small subunit ribosomal protein S7e	-	gra03010(Ribosome)	A0A0B0PQR6.1 PF01251.16;Ribosomal_S7e;	no	no
TRINITY_DN16356_c1_g2	5474	TRINITY_DN16356_c1_g2_i1;TRINITY_DN16356_c1_g2_i10;TRINITY_DN16356_c1_g2_i2;TRINITY_DN16356_c1_g2_i3;TRINITY_DN16356_c1_g2_i4;TRINITY_DN16356_c1_g2_i5;TRINITY_DN16356_c1_g2_i6;TRINITY_DN16356_c1_g2_i7;TRINITY_DN16356_c1_g2_i8;TRINITY_DN16356_c1_g2_i9	ferredoxin-dependent glutamate synthase, chloroplastic [Jatropha curcas]	GLU1	Ferredoxin-dependent glutamate synthase 1, chloroplastic/mitochondrial OS=Arabidopsis thaliana GN=GLU1 PE=1 SV=3	GO:0005737(cytoplasm);GO:0006537(glutamate biosynthetic process);GO:0015930(glutamate synthase activity);GO:0019676(ammonia assimilation cycle)	COG0067(glutamate synthase);COG0069(glutamate synthase);COG0070(glutamate synthase)	K00284	glutamate synthase (ferredoxin)	EC:1.4.7.1	jcu00630(Glyoxylate and dicarboxylate metabolism);jcu00910(Nitrogen metabolism)	W9RZU3.1 PF00310.19;GATase_2;	no	no
TRINITY_DN16363_c0_g1	1025	TRINITY_DN16363_c0_g1_i1;TRINITY_DN16363_c0_g1_i2;TRINITY_DN16363_c0_g1_i3	uncharacterized protein LOC110618255 [Manihot esculenta]	-	-	GO:0005515(protein binding);GO:0005634(nucleus);GO:0005829(cytosol);GO:0009646(response to absence of light);GO:0016853(isomerase activity);GO:0090549(response to carbon starvation)	ENOG410XQZZ(programmed cell death 4 (Neoplastic transformation inhibitor))	-	-	-	-	A0A059A688.1 PF02847.15;MA3;	up	yes
TRINITY_DN16365_c0_g1	447	TRINITY_DN16365_c0_g1_i1;TRINITY_DN16365_c0_g1_i2;TRINITY_DN16365_c0_g1_i3;TRINITY_DN16365_c0_g1_i4;TRINITY_DN16365_c0_g1_i5;TRINITY_DN16365_c0_g1_i6;TRINITY_DN16365_c0_g1_i7;TRINITY_DN16365_c0_g1_i8;TRINITY_DN16365_c0_g1_i9	miraculin-like protein, partial [Passiflora edulis]	-	-	-	-	-	-	-	-	-	no	no
TRINITY_DN16373_c1_g2	4060	TRINITY_DN16373_c1_g2_i1;TRINITY_DN16373_c1_g2_i10;TRINITY_DN16373_c1_g2_i11;TRINITY_DN16373_c1_g2_i12;TRINITY_DN16373_c1_g2_i13;TRINITY_DN16373_c1_g2_i2;TRINITY_DN16373_c1_g2_i3;TRINITY_DN16373_c1_g2_i4;TRINITY_DN16373_c1_g2_i5;TRINITY_DN16373_c1_g2_i6;T	PREDICTED: protein CHUP1, chloroplastic [Populus euphratica]	CHUP1	Protein CHUP1, chloroplastic OS=Arabidopsis thaliana GN=CHUP1 PE=1 SV=1	GO:0009658(chloroplast organization);GO:0009707(chloroplast outer membrane)	ENOG4111F63(Chloroplast unusual positioning)	-	-	-	-	-	no	no
TRINITY_DN16381_c0_g1	4408	TRINITY_DN16381_c0_g1_i1;TRINITY_DN16381_c0_g1_i10;TRINITY_DN16381_c0_g1_i11;TRINITY_DN16381_c0_g1_i12;TRINITY_DN16381_c0_g1_i13;TRINITY_DN16381_c0_g1_i14;TRINITY_DN16381_c0_g1_i15;TRINITY_DN16381_c0_g1_i16;TRINITY_DN16381_c0_g1_i17;TRINITY_DN16381_c0_g1_	putative LOV domain-containing protein [Passiflora caerulea]	PHOT1	Phototropin-1 OS=Arabidopsis thaliana GN=PHOT1 PE=1 SV=1	GO:0004674(protein serine/threonine kinase activity);GO:0005634(nucleus);GO:0005737(cytoplasm);GO:0005886(plasma membrane);GO:0035556(intracellular signal transduction)	COG2202(Histidine kinase)	NA	NA	NA	NA(NA)	A0A0A0KG03.1 PF00069.23;Pkinase;	up	yes
TRINITY_DN16390_c0_g6	3834	TRINITY_DN16390_c0_g6_i1;TRINITY_DN16390_c0_g6_i2	protein WEAK CHLOROPLAST MOVEMENT UNDER BLUE LIGHT 1 isoform X1 [Populus trichocarpa]	WEB1	Protein WEAK CHLOROPLAST MOVEMENT UNDER BLUE LIGHT 1 OS=Arabidopsis thaliana GN=WEB1 PE=1 SV=1	GO:0005829(cytosol);GO:0009903(chloroplast avoidance movement);GO:0009904(chloroplast accumulation movement)	ENOG410YG1U(Pfam:DUF827)	-	-	-	-	V4T4A5.1 PF05701.9;WEMBL;	no	no
TRINITY_DN16392_c0_g1	977	TRINITY_DN16392_c0_g1_i1;TRINITY_DN16392_c0_g1_i10;TRINITY_DN16392_c0_g1_i2;TRINITY_DN16392_c0_g1_i3;TRINITY_DN16392_c0_g1_i4;TRINITY_DN16392_c0_g1_i5;TRINITY_DN16392_c0_g1_i6;TRINITY_DN16392_c0_g1_i7;TRINITY_DN16392_c0_g1_i8;TRINITY_DN16392_c0_g1_i9	miraculin-like protein, partial [Passiflora edulis]	-	-	-	-	-	-	-	-	-	no	no
TRINITY_DN10936_c0_g1	2097	TRINITY_DN10936_c0_g1_i1;TRINITY_DN10936_c0_g1_i2;TRINITY_DN10936_c0_g1_i3;TRINITY_DN10936_c0_g1_i4	probable aldehyde dehydrogenase isoform X2 [Hevea brasiliensis]	ALDH12A1	Delta-1-pyrroline-5-carboxylate dehydrogenase 12A1, mitochondrial OS=Arabidopsis thaliana GN=ALDH12A1 PE=2 SV=1	GO:0003842(1-pyrroline-5-carboxylate dehydrogenase activity);GO:0004028(3-chloroallyl aldehyde dehydrogenase activity);GO:0004029(aldehyde dehydrogenase (NAD) activity)	COG4230(proline dehydrogenase, pyrroline-5-carboxylate dehydrogenase)	K00294	1-pyrroline-5-carboxylate dehydrogenase	EC:1.2.1.88	hbr00250(Alanine, aspartate and glutamate metabolism);hbr00330(Arginine and proline metabolism)	A0A067K8B0.1 PF00171.20;Aldedh;	no	no
TRINITY_DN16423_c0_g5	2719	TRINITY_DN16423_c0_g5_i1	cell division cycle protein 48 homolog [Hevea brasiliensis]	CDC48	Cell division cycle protein 48 homolog OS=Glycine max GN=CDC48 PE=2 SV=1	GO:0005515(protein binding);GO:0005524(ATP binding);GO:0005618(cell wall);GO:0005634(nucleus);GO:0005794(Golgi apparatus);GO:0005829(cytosol);GO:0005856(cytoskeleton);GO:0007049(cell cycle);GO:0009524(phragmoplast);GO:0015031(protein transport);GO:0016787	COG0464(Aaa atpase)	K13525	transitional endoplasmic reticulum ATPase	-	hbr04141(Protein processing in endoplasmic reticulum)	K4C9L4.1 PF00004.27;AAA;	down	yes
TRINITY_DN16426_c1_g3	9495	TRINITY_DN16426_c1_g3_i1;TRINITY_DN16426_c1_g3_i2	hypothetical protein, partial [Plantago major]	-	Genome polyprotein OS=Soybean mosaic virus (strain N) PE=1 SV=2	GO:0005515(protein binding)	-	-	-	-	-	P18247.2 PF00680.18;RdRP_1;	up	yes
TRINITY_DN10941_c0_g3	1402	TRINITY_DN10941_c0_g3_i1;TRINITY_DN10941_c0_g3_i2;TRINITY_DN10941_c0_g3_i3;TRINITY_DN10941_c0_g3_i4;TRINITY_DN10941_c0_g3_i5	PREDICTED: protein transport protein SEC13 homolog B [Vitis vinifera]	SEC13B	Protein transport protein SEC13 homolog B OS=Arabidopsis thaliana GN=SEC13B PE=1 SV=1	GO:0000166(nucleotide binding);GO:0005198(structural molecule activity);GO:0005635(nuclear envelope);GO:0005643(nuclear pore);GO:0005730(nucleolus);GO:0005737(cytoplasm);GO:0005783(endoplasmic reticulum);GO:0005829(cytosol);GO:0005834(heterotrimeric G-pro	ENOG410XPFM(Component of the coat protein complex II (COPII) which promotes the formation of transport vesicles from the endoplasmic reticulum (ER). The coat has two main functions, the physical deformation of the endoplasmic reticulum membrane into vesic	K14004	protein transport protein SEC13	-	vvi03013(RNA transport);vvi04141(Protein processing in endoplasmic reticulum)	W9R5V5.1 PF00400.30;WD40;	no	no
TRINITY_DN16469_c1_g1	1309	TRINITY_DN16469_c1_g1_i1;TRINITY_DN16469_c1_g1_i2;TRINITY_DN16469_c1_g1_i3;TRINITY_DN16469_c1_g1_i4;TRINITY_DN16469_c1_g1_i5;TRINITY_DN16469_c1_g1_i6;TRINITY_DN16469_c1_g1_i7;TRINITY_DN16469_c1_g1_i8;TRINITY_DN16469_c1_g1_i9	hypothetical protein CUMW_056150 [Citrus unshiu]	FUM1	Fumarate hydratase 1, mitochondrial OS=Arabidopsis thaliana GN=FUM1 PE=1 SV=2	GO:0004333(fumarate hydratase activity);GO:0005739(mitochondrion);GO:0005829(cytosol);GO:0006099(tricarboxylic acid cycle);GO:0006106(fumarate metabolic process);GO:0006108(malate metabolic process);GO:0051262(protein tetramerization)	COG0114(fumarate hydratase class II)	K01679	fumarate hydratase, class II	EC:4.2.1.2	tcc00020(Citrate cycle (TCA cycle));tcc00620(Pyruvate metabolism)	A0A0J8F116.1 PF00206.18;Lyase_1;	no	no
TRINITY_DN16471_c0_g1	1812	TRINITY_DN16471_c0_g1_i1;TRINITY_DN16471_c0_g1_i2;TRINITY_DN16471_c0_g1_i3;TRINITY_DN16471_c0_g1_i4;TRINITY_DN16471_c0_g1_i5	hypothetical protein B456_013G160200 [Gossypium raimondii]	RBP45	Polyadenylate-binding protein RBP45 OS=Nicotiana plumbaginifolia GN=RBP45 PE=1 SV=1	GO:0005634(nucleus);GO:0008143(poly(A) binding)	COG0724(Rna-binding protein)	K03231	elongation factor 1-alpha	-	cam03013(RNA transport)	B9I0E1.2 PF00076.20;RRM_1;	no	no
TRINITY_DN16482_c1_g1	6697	TRINITY_DN16482_c1_g1_i1;TRINITY_DN16482_c1_g1_i10;TRINITY_DN16482_c1_g1_i2;TRINITY_DN16482_c1_g1_i3;TRINITY_DN16482_c1_g1_i4;TRINITY_DN16482_c1_g1_i5;TRINITY_DN16482_c1_g1_i6;TRINITY_DN16482_c1_g1_i7;TRINITY_DN16482_c1_g1_i8;TRINITY_DN16482_c1_g1_i9	PREDICTED: microtubule-associated protein futsch-like isoform X3 [Populus euphratica]	-	-	-	ENOG410ZVAE(NA)	NA	NA	NA	NA(NA)	-	no	no
TRINITY_DN16491_c0_g6	2126	TRINITY_DN16491_c0_g6_i1	ATPase subunit 1 (mitochondrion) [Humulus lupulus]	ATPA	ATP synthase subunit alpha, mitochondrial OS=Beta vulgaris GN=ATPA PE=3 SV=1	GO:0000275(mitochondrial proton-transporting ATP synthase complex, catalytic core F(1));GO:0005739(mitochondrion);GO:0006754(ATP biosynthetic process)	COG0056(Produces ATP from ADP in the presence of a proton gradient across the membrane. The alpha chain is a regulatory subunit (By similarity))	K02132	F-type H+-transporting ATPase subunit alpha	-	bvg00190(Oxidative phosphorylation)	W5CAT7.1 PF00006.23;ATP-synt_ab;	no	no
TRINITY_DN16492_c1_g1	7196	TRINITY_DN16492_c1_g1_i1;TRINITY_DN16492_c1_g1_i10;TRINITY_DN16492_c1_g1_i11;TRINITY_DN16492_c1_g1_i12;TRINITY_DN16492_c1_g1_i13;TRINITY_DN16492_c1_g1_i14;TRINITY_DN16492_c1_g1_i15;TRINITY_DN16492_c1_g1_i16;TRINITY_DN16492_c1_g1_i2;TRINITY_DN16492_c1_g1_i	uncharacterized protein LOC110651242 isoform X2 [Hevea brasiliensis]	-	-	GO:0005634(nucleus);GO:0009506(plasmodesma)	ENOG410YJ5A(Agenet domain)	-	-	-	-	U5GMA4.1 PF05641.10;Agenet;	no	no
TRINITY_DN10947_c0_g2	1507	TRINITY_DN10947_c0_g2_i1;TRINITY_DN10947_c0_g2_i2	uncharacterized protein At1g32220, chloroplastic-like [Hevea brasiliensis]	At1g32220	Uncharacterized protein At1g32220, chloroplastic OS=Arabidopsis thaliana GN=At1g32220 PE=2 SV=1	GO:0003954(NADH dehydrogenase activity);GO:1901006(ubiquinone-6 biosynthetic process)	COG0702(epimerase dehydratase)	-	-	-	-	B9RNR1.1 PF13460.4;NAD_binding_10;	no	no
TRINITY_DN16511_c1_g1	4349	TRINITY_DN16511_c1_g1_i1;TRINITY_DN16511_c1_g1_i10;TRINITY_DN16511_c1_g1_i2;TRINITY_DN16511_c1_g1_i3;TRINITY_DN16511_c1_g1_i4;TRINITY_DN16511_c1_g1_i5;TRINITY_DN16511_c1_g1_i6;TRINITY_DN16511_c1_g1_i7;TRINITY_DN16511_c1_g1_i8;TRINITY_DN16511_c1_g1_i9	PREDICTED: ABC transporter G family member 35 [Theobroma cacao]	ABCG36	ABC transporter G family member 36 OS=Arabidopsis thaliana GN=ABCG36 PE=1 SV=1	GO:0005886(plasma membrane);GO:0016021(integral component of membrane);GO:0042626(ATPase activity, coupled to transmembrane movement of substances)	COG0842((ABC) transporter)	K05681	ATP-binding cassette, subfamily G (WHITE), member 2	-	cvr02010(ABC transporters)	B9GGM3.1 PF01061.22;ABC2_membrane;	no	no
TRINITY_DN16518_c0_g1	9504	TRINITY_DN16518_c0_g1_i1;TRINITY_DN16518_c0_g1_i2;TRINITY_DN16518_c0_g1_i3;TRINITY_DN16518_c0_g1_i4;TRINITY_DN16518_c0_g1_i5;TRINITY_DN16518_c0_g1_i6	hypothetical protein POPTR_010G019150 [Populus trichocarpa]	SYD	Chromatin structure-remodeling complex protein SYD OS=Arabidopsis thaliana GN=SYD PE=1 SV=1	GO:0003682(chromatin binding);GO:0005634(nucleus);GO:0005829(cytosol);GO:0009611(response to wounding);GO:0009908(flower development);GO:0010199(organ boundary specification between lateral organs and the meristem);GO:0016887(ATPase activity);GO:0040029(r	COG0553(helicase)	NA	NA	NA	NA(NA)	A0A022S4L5.1 PF00176.21;SNF2_N;	no	no
TRINITY_DN10951_c0_g1	1872	TRINITY_DN10951_c0_g1_i1;TRINITY_DN10951_c0_g1_i2	26S proteasome non-ATPase regulatory subunit 4 homolog isoform X1 [Morus notabilis]	RPN10	26S proteasome non-ATPase regulatory subunit 4 homolog OS=Arabidopsis thaliana GN=RPN10 PE=1 SV=1	GO:0005634(nucleus);GO:0005829(cytosol);GO:0008540(proteasome regulatory particle, base subcomplex);GO:0031593(polyubiquitin modification-dependent protein binding);GO:0043161(proteasome-mediated ubiquitin-dependent protein catabolic process);GO:0043248(p	COG5148(26S proteasome nonATPase regulatory subunit)	K03029	26S proteasome regulatory subunit N10	-	hbr03050(Proteasome)	U5GAB8.1 PF13519.4;VWA_2;	no	no
TRINITY_DN16571_c1_g5	2044	TRINITY_DN16571_c1_g5_i1	heat shock cognate 70 kDa protein [Jatropha curcas]	Hspa8	Heat shock cognate 71 kDa protein OS=Mus musculus GN=Hspa8 PE=1 SV=1	GO:0000151(ubiquitin ligase complex);GO:0001664(G-protein coupled receptor binding);GO:0005524(ATP binding);GO:0005814(centriole);GO:0005829(cytosol);GO:0005925(focal adhesion);GO:0016234(inclusion body);GO:0031072(heat shock protein binding);GO:0031397(n	COG0443(Heat shock protein)	K03283	heat shock 70kDa protein 1/2/6/8	-	jcu03040(Spliceosome);jcu04141(Protein processing in endoplasmic reticulum);jcu04144(Endocytosis)	F7AUW2.1 PF00012.18;HSP70;	no	no
TRINITY_DN16571_c1_g9	1334	TRINITY_DN16571_c1_g9_i1	PREDICTED: uncharacterized protein LOC105126277 [Populus euphratica]	pod	Peroxidase 15 OS=Ipomoea batatas GN=pod PE=1 SV=1	GO:0004601(peroxidase activity);GO:0020037(heme binding)	ENOG41119N5(Removal of H(2)O(2), oxidation of toxic reductants, biosynthesis and degradation of lignin, suberization, auxin catabolism, response to environmental stresses such as wounding, pathogen attack and oxidative stress. These functions might be dep	K00430	peroxidase	EC:1.11.1.7	jcu00940(Phenylpropanoid biosynthesis)	A0A067L780.1 PF00141.21;peroxidase;	down	yes
TRINITY_DN10954_c1_g6	953	TRINITY_DN10954_c1_g6_i1	thylakoid lumenal 19 kDa protein, chloroplastic [Populus trichocarpa]	At3g63540	Thylakoid lumenal 19 kDa protein, chloroplastic OS=Arabidopsis thaliana GN=At3g63540 PE=1 SV=2	-	ENOG4111I6X(Thylakoid lumenal 19 kDa protein)	-	-	-	-	B9SL97.1 PF01789.14;PsbP;	down	yes
TRINITY_DN16602_c1_g1	1178	TRINITY_DN16602_c1_g1_i1	Alpha/beta-Hydrolases superfamily protein [Theobroma cacao]	HIDM	2-hydroxyisoflavanone dehydratase OS=Glycyrrhiza echinata GN=HIDM PE=1 SV=1	GO:0009717(isoflavonoid biosynthetic process);GO:0033987(2-hydroxyisoflavanone dehydratase activity);GO:0046287(isoflavonoid metabolic process);GO:0052689(carboxylic ester hydrolase activity)	COG0657(alpha beta hydrolase fold-3 domain protein)	K13258	2-hydroxyisoflavanone dehydratase	EC:4.2.1.105	lang00943(Isoflavonoid biosynthesis)	A0A061EKQ6.1 PF07859.11;Abhydrolase_3;	no	no
TRINITY_DN16718_c0_g1	638	TRINITY_DN16718_c0_g1_i1	PREDICTED: 60S ribosomal protein L9-like [Musa acuminata subsp. malaccensis]	Rpl9	60S ribosomal protein L9 OS=Mus musculus GN=Rpl9 PE=2 SV=2	GO:0002181(cytoplasmic translation);GO:0003723(RNA binding);GO:0003735(structural constituent of ribosome);GO:0005622(intracellular);GO:0005840(ribosome);GO:0006412(translation);GO:0019843(rRNA binding);GO:0022625(cytosolic large ribosomal subunit);GO:003	COG0097(This protein binds to the 23S rRNA, and is important in its secondary structure. It is located near the subunit interface in the base of the L7 L12 stalk, and near the tRNA binding site of the peptidyltransferase center (By similarity))	K02940	large subunit ribosomal protein L9e	-	mus03010(Ribosome)	F6YIK2.1 PF00347.21;Ribosomal_L6;	no	no
TRINITY_DN17277_c0_g1	744	TRINITY_DN17277_c0_g1_i1	Photosystem II Pbs27 [Corchorus capsularis]	PSB27-1	Photosystem II repair protein PSB27-H1, chloroplastic OS=Arabidopsis thaliana GN=PSB27-1 PE=1 SV=1	GO:0008375(acetylglucosaminyltransferase activity);GO:0009507(chloroplast);GO:0009534(chloroplast thylakoid);GO:0009535(chloroplast thylakoid membrane);GO:0009543(chloroplast thylakoid lumen);GO:0009579(thylakoid);GO:0010206(photosystem II repair);GO:0010	ENOG4111SBP(Photosystem II)	K08902	photosystem II Psb27 protein	-	mdm00195(Photosynthesis)	A0A061EAQ4.1 PF13326.4;PSII_Pbs27;	no	no
TRINITY_DN3035_c0_g1	989	TRINITY_DN3035_c0_g1_i1	fructose-bisphosphate aldolase 5, cytosolic [Eutrema salsugineum]	Aldoa	Fructose-bisphosphate aldolase A OS=Mus musculus GN=Aldoa PE=1 SV=2	GO:0002020(protease binding);GO:0004332(fructose-bisphosphate aldolase activity);GO:0005615(extracellular space);GO:0005720(nuclear heterochromatin);GO:0005737(cytoplasm);GO:0005739(mitochondrion);GO:0005829(cytosol);GO:0006000(fructose metabolic process)	COG3588(fructose-bisphosphate aldolase)	K01623	fructose-bisphosphate aldolase, class I	EC:4.1.2.13	eus00010(Glycolysis / Gluconeogenesis);eus00030(Pentose phosphate pathway);eus00051(Fructose and mannose metabolism);eus00710(Carbon fixation in photosynthetic organisms)	G1PHQ0.1 PF00274.17;Glycolytic;	no	no
TRINITY_DN3534_c0_g1	571	TRINITY_DN3534_c0_g1_i1;TRINITY_DN3534_c0_g1_i2	unknown [Medicago truncatula]	crp-28	40S ribosomal protein S23 OS=Neurospora crassa (strain ATCC 24698 / 74-OR23-1A / CBS 708.71 / DSM 1257 / FGSC 987) GN=crp-28 PE=3 SV=1	GO:0003735(structural constituent of ribosome);GO:0006412(translation);GO:0022627(cytosolic small ribosomal subunit)	COG0048(Interacts with and stabilizes bases of the 16S rRNA that are involved in tRNA selection in the A site and with the mRNA backbone. Located at the interface of the 30S and 50S subunits, it traverses the body of the 30S subunit contacting proteins on	K02973	small subunit ribosomal protein S23e	-	mdm03010(Ribosome)	A0A060SA14.1 PF00164.23;Ribosom_S12_S23;	up	yes
TRINITY_DN10967_c0_g2	1112	TRINITY_DN10967_c0_g2_i1	30S ribosomal protein 2, chloroplastic isoform X1 [Jatropha curcas]	PSRP2	30S ribosomal protein 2, chloroplastic OS=Spinacia oleracea GN=PSRP2 PE=1 SV=1	GO:0003697(single-stranded DNA binding);GO:0003723(RNA binding);GO:0005840(ribosome);GO:0009409(response to cold);GO:0009414(response to water deprivation);GO:0009507(chloroplast);GO:0009535(chloroplast thylakoid membrane);GO:0009570(chloroplast stroma);G	ENOG410YC5S(RNA recognition motif (RRM)-containing protein)	K13126	polyadenylate-binding protein	-	jcu03013(RNA transport);jcu03015(mRNA surveillance pathway);jcu03018(RNA degradation)	B9HNK5.1 PF00076.20;RRM_1;	no	no
TRINITY_DN1096_c0_g2	485	TRINITY_DN1096_c0_g2_i1	oxygen-evolving enhancer protein 3-2, chloroplastic [Vigna radiata var. radiata]	PSBQ	Oxygen-evolving enhancer protein 3, chloroplastic OS=Spinacia oleracea GN=PSBQ PE=1 SV=1	GO:0005509(calcium ion binding);GO:0009507(chloroplast);GO:0009534(chloroplast thylakoid);GO:0009535(chloroplast thylakoid membrane);GO:0009543(chloroplast thylakoid lumen);GO:0009570(chloroplast stroma);GO:0009579(thylakoid);GO:0009654(photosystem II oxy	ENOG4111SJA(oxygen-evolving enhancer protein)	K08901	photosystem II oxygen-evolving enhancer protein 3	-	vra00195(Photosynthesis)	V7AQK1.1 PF05757.9;PsbQ;	no	no
TRINITY_DN10976_c0_g3	825	TRINITY_DN10976_c0_g3_i1;TRINITY_DN10976_c0_g3_i2	small nuclear ribonucleoprotein SmD3b [Jatropha curcas]	SMD3B	Small nuclear ribonucleoprotein SmD3b OS=Arabidopsis thaliana GN=SMD3B PE=2 SV=1	GO:0000243(commitment complex);GO:0000245(spliceosomal complex assembly);GO:0000387(spliceosomal snRNP assembly);GO:0003723(RNA binding);GO:0005682(U5 snRNP);GO:0005685(U1 snRNP);GO:0005686(U2 snRNP);GO:0005687(U4 snRNP);GO:0005689(U12-type spliceosomal c	COG1958(small nuclear ribonucleoprotein)	K11088	small nuclear ribonucleoprotein D3	-	jcu03040(Spliceosome)	A0A022Q0Q0.1 PF01423.20;LSM;	no	no
TRINITY_DN6168_c0_g1	546	TRINITY_DN6168_c0_g1_i1	hypothetical protein PHAVU_010G148800g [Phaseolus vulgaris]	PSAH	Photosystem I reaction center subunit VI, chloroplastic OS=Spinacia oleracea GN=PSAH PE=1 SV=1	GO:0003674(molecular_function);GO:0009507(chloroplast);GO:0009534(chloroplast thylakoid);GO:0009535(chloroplast thylakoid membrane);GO:0009538(photosystem I reaction center);GO:0009579(thylakoid);GO:0009735(response to cytokinin);GO:0010287(plastoglobule)	ENOG4112D30(Photosystem I reaction center subunit)	K02695	photosystem I subunit VI	-	pvu00195(Photosynthesis)	C6SWI9.1 PF03244.12;PSI_PsaH;	no	no
TRINITY_DN10191_c0_g2	1425	TRINITY_DN10191_c0_g2_i1;TRINITY_DN10191_c0_g2_i2	PREDICTED: 33 kDa ribonucleoprotein, chloroplastic-like [Populus euphratica]	CP33	RNA-binding protein CP33, chloroplastic OS=Arabidopsis thaliana GN=CP33 PE=2 SV=1	GO:0003723(RNA binding);GO:0003729(mRNA binding);GO:0006397(mRNA processing);GO:0009507(chloroplast);GO:0009570(chloroplast stroma);GO:0009579(thylakoid);GO:0031425(chloroplast RNA processing);GO:1901259(chloroplast rRNA processing)	COG0724(Rna-binding protein)	NA	NA	NA	NA(NA)	A0A061ETW1.1 PF00076.20;RRM_1;	no	no
TRINITY_DN8617_c0_g1	389	TRINITY_DN8617_c0_g1_i1	glycine-rich protein 2-like [Manihot esculenta]	GRP-2	Glycine-rich protein 2 OS=Nicotiana sylvestris GN=GRP-2 PE=2 SV=1	GO:0004477(methenyltetrahydrofolate cyclohydrolase activity);GO:0004488(methylenetetrahydrofolate dehydrogenase (NADP+) activity);GO:0005829(cytosol);GO:0006730(one-carbon metabolic process)	COG1278(Cold shock protein)	NA	NA	NA	NA(NA)	A0A067K074.1 PF00313.20;CSD;	no	no
TRINITY_DN8951_c1_g1	2050	TRINITY_DN8951_c1_g1_i1;TRINITY_DN8951_c1_g1_i2	multicopper oxidase LPR1-like [Hevea brasiliensis]	LPR1	Multicopper oxidase LPR1 OS=Arabidopsis thaliana GN=LPR1 PE=2 SV=1	GO:0005507(copper ion binding);GO:0016722(oxidoreductase activity, oxidizing metal ions)	COG2132(Multicopper oxidase)	-	-	-	-	I1LEL1.2 PF07731.12;Cu-oxidase_2;	no	no
TRINITY_DN11106_c0_g8	834	TRINITY_DN11106_c0_g8_i1	histone H2AX-like [Carica papaya]	HIS2A	Histone H2AX OS=Cicer arietinum GN=HIS2A PE=2 SV=1	GO:0000790(nuclear chromatin);GO:0003677(DNA binding);GO:0006342(chromatin silencing)	COG5262(histone h2a)	NA	NA	NA	NA(NA)	V7BM87.1 PF00125.22;Histone;	no	no
TRINITY_DN9366_c0_g1	1097	TRINITY_DN9366_c0_g1_i1;TRINITY_DN9366_c0_g1_i2	Vesicle coat protein clathrin, light chain [Handroanthus impetiginosus]	Os04g0679100	Clathrin light chain 1 OS=Oryza sativa subsp. japonica GN=Os04g0679100 PE=2 SV=1	GO:0005198(structural molecule activity);GO:0030125(clathrin vesicle coat);GO:0032050(clathrin heavy chain binding);GO:0072583(clathrin-dependent endocytosis)	ENOG410YMJV(Clathrin is the major protein of the polyhedral coat of coated pits and vesicles)	K04645	clathrin light chain B	-	brp04144(Endocytosis)	A0A067JKF0.1 PF01086.15;Clathrin_lg_ch;	no	no
TRINITY_DN9429_c0_g1	895	TRINITY_DN9429_c0_g1_i1;TRINITY_DN9429_c0_g1_i2;TRINITY_DN9429_c0_g1_i3	PREDICTED: non-symbiotic hemoglobin 2-like [Nelumbo nucifera]	HB2	Non-symbiotic hemoglobin 2 OS=Gossypium hirsutum GN=HB2 PE=3 SV=1	GO:0005344(oxygen carrier activity);GO:0005737(cytoplasm);GO:0006631(fatty acid metabolic process);GO:0009735(response to cytokinin);GO:0015671(oxygen transport);GO:0019432(triglyceride biosynthetic process);GO:0019825(oxygen binding);GO:0020037(heme bind	COG1018(Is involved in NO detoxification in an aerobic process, termed nitric oxide dioxygenase (NOD) reaction that utilizes O(2) and NAD(P)H to convert NO to nitrate, which protects the bacterium from various noxious nitrogen compounds. Therefore, plays	NA	NA	NA	NA(NA)	A0A067LCU3.1 PF00042.20;Globin;	no	no
TRINITY_DN9675_c0_g1	1144	TRINITY_DN9675_c0_g1_i1;TRINITY_DN9675_c0_g1_i2	peroxidase N1-like [Durio zibethinus]	poxN1	Peroxidase N1 OS=Nicotiana tabacum GN=poxN1 PE=1 SV=1	GO:0004601(peroxidase activity);GO:0009505(plant-type cell wall);GO:0009664(plant-type cell wall organization)	ENOG4111ADF(Cationic peroxidase)	K00430	peroxidase	EC:1.11.1.7	rcu00940(Phenylpropanoid biosynthesis)	F6H1N5.1 PF00141.21;peroxidase;	no	no
TRINITY_DN9702_c0_g1	1239	TRINITY_DN9702_c0_g1_i1;TRINITY_DN9702_c0_g1_i2	50S ribosomal protein L10, chloroplastic [Hevea brasiliensis]	RPL10	50S ribosomal protein L10, chloroplastic OS=Arabidopsis thaliana GN=RPL10 PE=2 SV=1	GO:0003735(structural constituent of ribosome);GO:0005840(ribosome);GO:0006412(translation);GO:0009507(chloroplast);GO:0009570(chloroplast stroma);GO:0009941(chloroplast envelope);GO:0015934(large ribosomal subunit);GO:0019843(rRNA binding);GO:0022626(cyt	COG0244(50s ribosomal protein L10)	K02864	large subunit ribosomal protein L10	-	hbr03010(Ribosome)	B9RY97.1 PF00466.18;Ribosomal_L10;	no	no
TRINITY_DN9764_c0_g1	916	TRINITY_DN9764_c0_g1_i1	30S ribosomal protein S20, chloroplastic [Jatropha curcas]	RPS20	30S ribosomal protein S20, chloroplastic OS=Arabidopsis thaliana GN=RPS20 PE=2 SV=1	GO:0003735(structural constituent of ribosome);GO:0005840(ribosome);GO:0006412(translation);GO:0009507(chloroplast);GO:0009570(chloroplast stroma);GO:0009941(chloroplast envelope);GO:0016020(membrane);GO:0019843(rRNA binding);GO:0042254(ribosome biogenesi	ENOG41129UT(ribosomal protein S20)	K02968	small subunit ribosomal protein S20	-	jcu03010(Ribosome)	W9S1K3.1 PF01649.16;Ribosomal_S20p;	no	no
TRINITY_DN9780_c0_g1	986	TRINITY_DN9780_c0_g1_i1	uncharacterized protein LOC110612317 [Manihot esculenta]	-	-	GO:0005634(nucleus)	ENOG4112AU7(NA)	-	-	-	-	U5FI91.1 PF10262.7;Rdx;	no	no
TRINITY_DN9869_c0_g1	1098	TRINITY_DN9869_c0_g1_i1;TRINITY_DN9869_c0_g1_i2;TRINITY_DN9869_c0_g1_i3	peroxidase 4-like [Hevea brasiliensis]	GSVIVT00023967001	Peroxidase 4 OS=Vitis vinifera GN=GSVIVT00023967001 PE=1 SV=1	GO:0004601(peroxidase activity);GO:0005515(protein binding);GO:0005576(extracellular region);GO:0005618(cell wall);GO:0005794(Golgi apparatus);GO:0005829(cytosol);GO:0006979(response to oxidative stress);GO:0009809(lignin biosynthetic process);GO:0010089(	ENOG410YAKJ(peroxidase)	K00430	peroxidase	EC:1.11.1.7	hbr00940(Phenylpropanoid biosynthesis)	B9I6X2.2 PF00141.21;peroxidase;	no	no
TRINITY_DN9910_c0_g1	873	TRINITY_DN9910_c0_g1_i1;TRINITY_DN9910_c0_g1_i2	PREDICTED: somatic embryogenesis receptor kinase 1-like [Populus euphratica]	SERK2	Somatic embryogenesis receptor kinase 2 OS=Arabidopsis thaliana GN=SERK2 PE=1 SV=1	GO:0004675(transmembrane receptor protein serine/threonine kinase activity);GO:0005515(protein binding);GO:0005524(ATP binding);GO:0005886(plasma membrane);GO:0006468(protein phosphorylation);GO:0007166(cell surface receptor signaling pathway);GO:0008289(	ENOG410YHAC(receptor kinase)	K13416	brassinosteroid insensitive 1-associated receptor kinase 1	EC:2.7.10.1 2.7.11.1	cit04016(MAPK signaling pathway - plant);cit04075(Plant hormone signal transduction);cit04626(Plant-pathogen interaction)	V4SWK8.1 PF08263.10;LRRNT_2;	no	no
TRINITY_DN9954_c0_g1	1236	TRINITY_DN9954_c0_g1_i1	DNA damage-repair/toleration protein DRT102 [Populus trichocarpa]	DRT102	DNA-damage-repair/toleration protein DRT102 OS=Arabidopsis thaliana GN=DRT102 PE=1 SV=2	GO:0000719(photoreactive repair);GO:0005634(nucleus);GO:0005737(cytoplasm);GO:0005829(cytosol);GO:0005975(carbohydrate metabolic process);GO:0006281(DNA repair);GO:0009409(response to cold);GO:0009411(response to UV);GO:0016853(isomerase activity)	COG0698(Isomerase)	-	-	-	-	M5WC00.1 PF02502.16;LacAB_rpiB;	no	no
TRINITY_DN11018_c0_g4	1187	TRINITY_DN11018_c0_g4_i1;TRINITY_DN11018_c0_g4_i2;TRINITY_DN11018_c0_g4_i3	PREDICTED: 40S ribosomal protein S4 [Nicotiana tomentosiformis]	RPS4	40S ribosomal protein S4 OS=Solanum tuberosum GN=RPS4 PE=2 SV=1	GO:0003735(structural constituent of ribosome);GO:0006412(translation);GO:0022627(cytosolic small ribosomal subunit)	COG1471((ribosomal) protein)	K02987	small subunit ribosomal protein S4e	-	nta03010(Ribosome)	S8D001.1 PF00900.18;Ribosomal_S4e;	no	no
TRINITY_DN11029_c0_g1	771	TRINITY_DN11029_c0_g1_i1	uncharacterized protein LOC110650207 [Hevea brasiliensis]	-	-	GO:0003674(molecular_function);GO:0009507(chloroplast);GO:0055114(oxidation-reduction process)	ENOG411229A(glutaredoxin 2)	-	-	-	-	B9GU56.1 PF05768.12;DUF836;	no	no
TRINITY_DN11032_c0_g1	1002	TRINITY_DN11032_c0_g1_i1;TRINITY_DN11032_c0_g1_i2	PREDICTED: putative 12-oxophytodienoate reductase 11 [Theobroma cacao]	OPR1	12-oxophytodienoate reductase 1 OS=Arabidopsis thaliana GN=OPR1 PE=1 SV=2	GO:0003959(NADPH dehydrogenase activity);GO:0005622(intracellular);GO:0055114(oxidation-reduction process)	COG1902(NADH flavin oxidoreductase, NADH oxidase)	K05894	12-oxophytodienoic acid reductase	EC:1.3.1.42	tcc00592(alpha-Linolenic acid metabolism)	A0A061GGA0.1 PF00724.18;Oxidored_FMN;	no	no
TRINITY_DN11044_c0_g2	2181	TRINITY_DN11044_c0_g2_i1;TRINITY_DN11044_c0_g2_i2;TRINITY_DN11044_c0_g2_i3	dihydrolipoyllysine-residue acetyltransferase component 2 of pyruvate dehydrogenase complex, mitochondrial isoform X4 [Populus trichocarpa]	At3g13930	Dihydrolipoyllysine-residue acetyltransferase component 2 of pyruvate dehydrogenase complex, mitochondrial OS=Arabidopsis thaliana GN=At3g13930 PE=1 SV=2	GO:0004742(dihydrolipoyllysine-residue acetyltransferase activity);GO:0005739(mitochondrion);GO:0005759(mitochondrial matrix);GO:0006096(glycolytic process);GO:0045254(pyruvate dehydrogenase complex)	COG0508(Dehydrogenase)	K00627	pyruvate dehydrogenase E2 component (dihydrolipoamide acetyltransferase)	EC:2.3.1.12	hbr00010(Glycolysis / Gluconeogenesis);hbr00020(Citrate cycle (TCA cycle));hbr00620(Pyruvate metabolism)	A0A061GJE7.1 PF00198.21;2-oxoacid_dh;	no	no
TRINITY_DN11044_c0_g3	528	TRINITY_DN11044_c0_g3_i1	hypothetical protein AMTR_s00065p00209640 [Amborella trichopoda]	LAP1	Leucine aminopeptidase 1 OS=Arabidopsis thaliana GN=LAP1 PE=1 SV=1	GO:0004177(aminopeptidase activity);GO:0005737(cytoplasm);GO:0005773(vacuole);GO:0005829(cytosol);GO:0006508(proteolysis);GO:0008235(metalloexopeptidase activity);GO:0009507(chloroplast);GO:0009570(chloroplast stroma);GO:0016805(dipeptidase activity);GO:0	COG0260(Presumably involved in the processing and regular turnover of intracellular proteins. Catalyzes the removal of unsubstituted N-terminal amino acids from various peptides (By similarity))	K01255	leucyl aminopeptidase	EC:3.4.11.1	atr00480(Glutathione metabolism)	U5D909.1 PF00883.19;Peptidase_M17;	no	no
TRINITY_DN11047_c0_g1	1919	TRINITY_DN11047_c0_g1_i1	aminoacylase-1 [Populus trichocarpa]	Acy1	Aminoacylase-1 OS=Mus musculus GN=Acy1 PE=1 SV=1	GO:0004046(aminoacylase activity);GO:0005783(endoplasmic reticulum);GO:0006520(cellular amino acid metabolic process);GO:0009507(chloroplast)	COG0624(succinyl-diaminopimelate desuccinylase activity)	K14677	aminoacylase	EC:3.5.1.14	hbr00220(Arginine biosynthesis)	B9GU58.2 PF01546.26;Peptidase_M20;	no	no
TRINITY_DN11065_c0_g5	866	TRINITY_DN11065_c0_g5_i1;TRINITY_DN11065_c0_g5_i2	pyruvate dehydrogenase E1 component subunit beta, mitochondrial isoform X1 [Populus trichocarpa]	Os08g0536000	Pyruvate dehydrogenase E1 component subunit beta-1, mitochondrial OS=Oryza sativa subsp. japonica GN=Os08g0536000 PE=2 SV=1	GO:0004674(protein serine/threonine kinase activity);GO:0004739(pyruvate dehydrogenase (acetyl-transferring) activity);GO:0005524(ATP binding);GO:0005730(nucleolus);GO:0005739(mitochondrion);GO:0005759(mitochondrial matrix);GO:0005774(vacuolar membrane);G	COG0022(Dehydrogenase, E1 component)	K00162	pyruvate dehydrogenase E1 component beta subunit	EC:1.2.4.1	cit00010(Glycolysis / Gluconeogenesis);cit00020(Citrate cycle (TCA cycle));cit00620(Pyruvate metabolism)	M0ZZ08.1 PF02780.18;Transketolase_C;	no	no
TRINITY_DN11066_c0_g3	2705	TRINITY_DN11066_c0_g3_i1;TRINITY_DN11066_c0_g3_i10;TRINITY_DN11066_c0_g3_i11;TRINITY_DN11066_c0_g3_i12;TRINITY_DN11066_c0_g3_i13;TRINITY_DN11066_c0_g3_i14;TRINITY_DN11066_c0_g3_i15;TRINITY_DN11066_c0_g3_i2;TRINITY_DN11066_c0_g3_i3;TRINITY_DN11066_c0_g3_i4	beta-fructofuranosidase, cell wall isozyme-like [Hevea brasiliensis]	CWINV1	Beta-fructofuranosidase, insoluble isoenzyme CWINV1 OS=Arabidopsis thaliana GN=CWINV1 PE=1 SV=1	GO:0004553(hydrolase activity, hydrolyzing O-glycosyl compounds);GO:0004564(beta-fructofuranosidase activity);GO:0004575(sucrose alpha-glucosidase activity);GO:0005515(protein binding);GO:0005576(extracellular region);GO:0005618(cell wall);GO:0005886(plas	COG1621(Hydrolase)	K01193	beta-fructofuranosidase	EC:3.2.1.26	hbr00052(Galactose metabolism);hbr00500(Starch and sucrose metabolism)	A0A059BUY2.1 PF00251.18;Glyco_hydro_32N;	no	no
TRINITY_DN11073_c0_g12	1313	TRINITY_DN11073_c0_g12_i1;TRINITY_DN11073_c0_g12_i2	U2 small nuclear ribonucleoprotein A' [Hevea brasiliensis]	At1g09760	U2 small nuclear ribonucleoprotein A' OS=Arabidopsis thaliana GN=At1g09760 PE=2 SV=2	GO:0000398(mRNA splicing, via spliceosome)	COG4886(leucine Rich Repeat)	K11092	U2 small nuclear ribonucleoprotein A'	-	hbr03040(Spliceosome)	W9S9M5.1 PF14580.4;LRR_9;	no	no
TRINITY_DN10214_c1_g3	1396	TRINITY_DN10214_c1_g3_i1	uncharacterized oxidoreductase At4g09670 [Ricinus communis]	At4g09670	Uncharacterized oxidoreductase At4g09670 OS=Arabidopsis thaliana GN=At4g09670 PE=1 SV=1	GO:0016491(oxidoreductase activity);GO:0055114(oxidation-reduction process)	COG0673(oxidoreductase)	-	-	-	-	B9SMA3.1 PF01408.20;GFO_IDH_MocA;	no	no
TRINITY_DN11086_c0_g1	1261	TRINITY_DN11086_c0_g1_i1;TRINITY_DN11086_c0_g1_i2	RNA-binding protein 1-like isoform X2 [Manihot esculenta]	NSRB	Nuclear speckle RNA-binding protein B OS=Arabidopsis thaliana GN=NSRB PE=2 SV=1	GO:0000398(mRNA splicing, via spliceosome);GO:0035614(snRNA stem-loop binding)	ENOG41127HC(RNA recognition motif containing protein)	-	-	-	-	B9I1Z7.1 PF00076.20;RRM_1;	no	no
TRINITY_DN11116_c0_g1	1701	TRINITY_DN11116_c0_g1_i1;TRINITY_DN11116_c0_g1_i2	pyridine nucleotide-disulfide oxidoreductase family protein [Populus tomentosa]	CHLP	Geranylgeranyl diphosphate reductase, chloroplastic OS=Arabidopsis thaliana GN=CHLP PE=1 SV=1	GO:0005515(protein binding);GO:0009507(chloroplast);GO:0009534(chloroplast thylakoid);GO:0009535(chloroplast thylakoid membrane);GO:0009941(chloroplast envelope);GO:0010189(vitamin E biosynthetic process);GO:0015979(photosynthesis);GO:0015995(chlorophyll	COG0644(geranylgeranyl reductase)	K10960	geranylgeranyl diphosphate/geranylgeranyl-bacteriochlorophyllide a reductase	EC:1.3.1.83 1.3.1.111	jcu00860(Porphyrin and chlorophyll metabolism);jcu00900(Terpenoid backbone biosynthesis)	Q7U789.1 PF01494.17;FAD_binding_3;	no	no
TRINITY_DN11121_c0_g2	798	TRINITY_DN11121_c0_g2_i1	mitochondrial glycine decarboxylase complex P-protein [Populus tremuloides]	GLDP1	Glycine dehydrogenase (decarboxylating) 1, mitochondrial OS=Arabidopsis thaliana GN=GLDP1 PE=1 SV=2	GO:0004375(glycine dehydrogenase (decarboxylating) activity);GO:0005739(mitochondrion);GO:0005829(cytosol);GO:0005960(glycine cleavage complex);GO:0016594(glycine binding);GO:0019464(glycine decarboxylation via glycine cleavage system)	COG0403(The glycine cleavage system catalyzes the degradation of glycine. The P protein binds the alpha-amino group of glycine through its pyridoxal phosphate cofactor);COG1003(The glycine cleavage system catalyzes the degradation of glycine. The P protei	K00281	glycine dehydrogenase	EC:1.4.4.2	hbr00630(Glyoxylate and dicarboxylate metabolism);hbr00260(Glycine, serine and threonine metabolism)	W9RBP3.1 PF02347.14;GDC-P;	no	no
TRINITY_DN11125_c1_g4	755	TRINITY_DN11125_c1_g4_i1;TRINITY_DN11125_c1_g4_i2	PREDICTED: uncharacterized protein LOC108457983 [Gossypium arboreum]	-	-	GO:0004848(ureidoglycolate hydrolase activity);GO:0005829(cytosol);GO:0008150(biological_process)	ENOG4111K8A(NA)	-	-	-	-	A0A0J8D0Q5.1 PF04115.10;Ureidogly_lyase;	no	no
TRINITY_DN11132_c0_g3	1859	TRINITY_DN11132_c0_g3_i1;TRINITY_DN11132_c0_g3_i2	protein CURVATURE THYLAKOID 1D, chloroplastic-like isoform X2 [Hevea brasiliensis]	CURT1D	Protein CURVATURE THYLAKOID 1D, chloroplastic OS=Arabidopsis thaliana GN=CURT1D PE=1 SV=1	GO:0009507(chloroplast);GO:0009535(chloroplast thylakoid membrane);GO:0009579(thylakoid);GO:0016021(integral component of membrane)	ENOG4111UCM(NA)	K01092	myo-inositol-1(or 4)-monophosphatase	EC:3.1.3.25	boe00562(Inositol phosphate metabolism);boe04070(Phosphatidylinositol signaling system)	B9SXI0.1 PF14159.4;CAAD;	no	no
TRINITY_DN11140_c0_g6	812	TRINITY_DN11140_c0_g6_i1;TRINITY_DN11140_c0_g6_i2;TRINITY_DN11140_c0_g6_i3	miraculin-like protein, partial [Passiflora edulis]	-	-	-	-	-	-	-	-	-	no	no
TRINITY_DN11143_c1_g3	1663	TRINITY_DN11143_c1_g3_i1	SH3 domain-containing protein 3-like [Manihot esculenta]	SH3P3	SH3 domain-containing protein 3 OS=Arabidopsis thaliana GN=SH3P3 PE=1 SV=1	GO:0030136(clathrin-coated vesicle);GO:0030276(clathrin binding)	ENOG410ZK1G(SH3 domain)	K11247	endophilin-A	-	vra04144(Endocytosis)	K4CDF5.1 PF03114.16;BAR;	no	no
TRINITY_DN11146_c0_g3	933	TRINITY_DN11146_c0_g3_i1;TRINITY_DN11146_c0_g3_i2	uncharacterized protein LOC7492896 [Populus trichocarpa]	-	-	GO:0003674(molecular_function);GO:0008150(biological_process);GO:0009507(chloroplast)	ENOG41126CI(NA)	-	-	-	-	-	no	no
TRINITY_DN11153_c0_g2	2063	TRINITY_DN11153_c0_g2_i1;TRINITY_DN11153_c0_g2_i2;TRINITY_DN11153_c0_g2_i3;TRINITY_DN11153_c0_g2_i4;TRINITY_DN11153_c0_g2_i5;TRINITY_DN11153_c0_g2_i6;TRINITY_DN11153_c0_g2_i7	PREDICTED: probable pectinesterase/pectinesterase inhibitor 35 [Populus euphratica]	PME35	Probable pectinesterase/pectinesterase inhibitor 35 OS=Arabidopsis thaliana GN=PME35 PE=2 SV=1	GO:0030599(pectinesterase activity);GO:0046910(pectinesterase inhibitor activity);GO:0071944(cell periphery)	COG4677(pectinesterase)	K01051	pectinesterase	EC:3.1.1.11	pxb00040(Pentose and glucuronate interconversions)	B9IAC3.2 PF01095.17;Pectinesterase;	no	no
TRINITY_DN11158_c1_g2	1210	TRINITY_DN11158_c1_g2_i1;TRINITY_DN11158_c1_g2_i2;TRINITY_DN11158_c1_g2_i3;TRINITY_DN11158_c1_g2_i4;TRINITY_DN11158_c1_g2_i5;TRINITY_DN11158_c1_g2_i6	hypothetical protein DVH24_006704 [Malus domestica]	At2g18110	Elongation factor 1-delta 2 OS=Arabidopsis thaliana GN=At2g18110 PE=1 SV=1	GO:0003746(translation elongation factor activity);GO:0005829(cytosol);GO:0005840(ribosome);GO:0005853(eukaryotic translation elongation factor 1 complex);GO:0005886(plasma membrane);GO:0006414(translational elongation);GO:0009808(lignin metabolic process	COG2092(Promotes the exchange of GDP for GTP in EF-1-alpha GDP, thus allowing the regeneration of EF-1-alpha GTP that could then be used to form the ternary complex EF-1-alpha GTP AAtRNA (By similarity))	NA	NA	NA	NA(NA)	A0A0D2N272.1 PF00736.17;EF1_GNE;	no	no
TRINITY_DN11176_c0_g10	870	TRINITY_DN11176_c0_g10_i1;TRINITY_DN11176_c0_g10_i2	peptidyl-prolyl cis-trans isomerase FKBP13, chloroplastic [Populus trichocarpa]	FKBP13	Peptidyl-prolyl cis-trans isomerase FKBP13, chloroplastic OS=Arabidopsis thaliana GN=FKBP13 PE=1 SV=2	GO:0003755(peptidyl-prolyl cis-trans isomerase activity);GO:0005528(FK506 binding);GO:0005789(endoplasmic reticulum membrane);GO:0061077(chaperone-mediated protein folding)	COG0545(Peptidyl-prolyl cis-trans isomerase)	NA	NA	NA	NA(NA)	M5X2D8.1 PF00254.26;FKBP_C;	no	no
TRINITY_DN11181_c0_g5	1292	TRINITY_DN11181_c0_g5_i1;TRINITY_DN11181_c0_g5_i2	ubiquitin-fold modifier 1 isoform X2 [Populus trichocarpa]	At1g77710	Ubiquitin-fold modifier 1 OS=Arabidopsis thaliana GN=At1g77710 PE=3 SV=1	GO:0005634(nucleus);GO:0005737(cytoplasm);GO:1990592(protein K69-linked ufmylation)	ENOG4111TVI(Ubiquitin-fold modifier 1)	NA	NA	NA	NA(NA)	A0A0D2SJQ0.1 PF03671.12;Ufm1;	no	no
TRINITY_DN11191_c0_g1	2330	TRINITY_DN11191_c0_g1_i1;TRINITY_DN11191_c0_g1_i2	filament-like plant protein 3 [Populus trichocarpa]	FPP3	Filament-like plant protein 3 OS=Arabidopsis thaliana GN=FPP3 PE=2 SV=2	GO:0005515(protein binding);GO:0030674(protein binding, bridging);GO:0031410(cytoplasmic vesicle);GO:0060178(regulation of exocyst localization)	ENOG410YAAZ(filament-like plant protein)	NA	NA	NA	NA(NA)	F6H0L3.1 PF05911.9;FPP;	no	no
TRINITY_DN11219_c0_g1	2607	TRINITY_DN11219_c0_g1_i1	subtilisin-like protease SBT1.7 [Populus trichocarpa]	SBT1.7	Subtilisin-like protease SBT1.7 OS=Arabidopsis thaliana GN=SBT1.7 PE=1 SV=1	GO:0004252(serine-type endopeptidase activity);GO:0005618(cell wall)	COG1404(peptidase (S8 and S53, subtilisin, kexin, sedolisin)	NA	NA	NA	NA(NA)	U5FNN2.1 PF00082.20;Peptidase_S8;	no	no
TRINITY_DN10247_c2_g3	886	TRINITY_DN10247_c2_g3_i1;TRINITY_DN10247_c2_g3_i2;TRINITY_DN10247_c2_g3_i3;TRINITY_DN10247_c2_g3_i4	hypothetical protein CISIN_1g032389mg [Citrus sinensis]	WIN2	Wound-induced protein WIN2 OS=Solanum tuberosum GN=WIN2 PE=2 SV=1	GO:0000325(plant-type vacuole);GO:0004540(ribonuclease activity);GO:0004568(chitinase activity);GO:0005576(extracellular region);GO:0008061(chitin binding);GO:0009615(response to virus);GO:0009627(systemic acquired resistance);GO:0009651(response to salt	COG3979(chitinase)	-	-	-	-	V4S9X8.1 PF00967.15;Barwin;	no	no
TRINITY_DN10029_c1_g3	863	TRINITY_DN10029_c1_g3_i1	PREDICTED: small heat shock protein, chloroplastic-like [Populus euphratica]	HSP21	Small heat shock protein, chloroplastic OS=Solanum lycopersicum GN=HSP21 PE=2 SV=1	GO:0000427(plastid-encoded plastid RNA polymerase complex);GO:0005515(protein binding);GO:0006351(transcription, DNA-templated);GO:0006355(regulation of transcription, DNA-templated);GO:0009408(response to heat);GO:0009416(response to light stimulus);GO:0	COG0071(response to heat)	K13993	HSP20 family protein	-	cmo04141(Protein processing in endoplasmic reticulum)	B9HTE1.2 PF00011.19;HSP20;	no	no
TRINITY_DN10247_c2_g8	974	TRINITY_DN10247_c2_g8_i1	PREDICTED: uncharacterized protein LOC105115908 [Populus euphratica]	-	-	-	ENOG4111C0Z(NA)	-	-	-	-	-	no	no
TRINITY_DN11245_c0_g2	1663	TRINITY_DN11245_c0_g2_i1;TRINITY_DN11245_c0_g2_i2	PREDICTED: catalase isozyme 1 [Vitis vinifera]	CAT1	Catalase isozyme 1 (Fragment) OS=Nicotiana plumbaginifolia GN=CAT1 PE=2 SV=1	GO:0004096(catalase activity);GO:0005737(cytoplasm);GO:0020037(heme binding);GO:0042542(response to hydrogen peroxide);GO:0042744(hydrogen peroxide catabolic process)	COG0753(Catalase)	K03781	catalase	EC:1.11.1.6	vvi00630(Glyoxylate and dicarboxylate metabolism);vvi00380(Tryptophan metabolism);vvi04016(MAPK signaling pathway - plant);vvi04146(Peroxisome)	F6I0K4.1 PF00199.17;Catalase;	no	no
TRINITY_DN11249_c0_g5	1636	TRINITY_DN11249_c0_g5_i1;TRINITY_DN11249_c0_g5_i2	COBW domain-containing protein 1-like [Manihot esculenta]	CBWD1	COBW domain-containing protein 1 OS=Homo sapiens GN=CBWD1 PE=2 SV=1	GO:0009295(nucleoid);GO:0009507(chloroplast);GO:0009508(plastid chromosome);GO:0009570(chloroplast stroma)	COG0523(cobalamin synthesis protein)	NA	NA	NA	NA(NA)	U5GLM4.1 PF02492.17;cobW;	no	no
TRINITY_DN11297_c1_g1	1963	TRINITY_DN11297_c1_g1_i1;TRINITY_DN11297_c1_g1_i2	DEAD-box ATP-dependent RNA helicase 20 [Manihot esculenta]	RH20	DEAD-box ATP-dependent RNA helicase 20 OS=Arabidopsis thaliana GN=RH20 PE=2 SV=1	GO:0004004(ATP-dependent RNA helicase activity);GO:0010501(RNA secondary structure unwinding)	COG0513(purine NTP-dependent helicase activity)	K12823	ATP-dependent RNA helicase DDX5/DBP2	EC:3.6.4.13	rcu03040(Spliceosome)	A0A067FQ40.1 PF00270.27;DEAD;	no	no
TRINITY_DN11297_c1_g3	2759	TRINITY_DN11297_c1_g3_i1;TRINITY_DN11297_c1_g3_i2;TRINITY_DN11297_c1_g3_i3	PREDICTED: subtilisin-like protease [Populus euphratica]	SBT1.4	Subtilisin-like protease SBT1.4 OS=Arabidopsis thaliana GN=SBT1.4 PE=2 SV=1	GO:0004252(serine-type endopeptidase activity);GO:0005618(cell wall)	COG1404(peptidase (S8 and S53, subtilisin, kexin, sedolisin)	NA	NA	NA	NA(NA)	B9HS19.1 PF00082.20;Peptidase_S8;	no	no
TRINITY_DN11324_c1_g7	1258	TRINITY_DN11324_c1_g7_i1	hypothetical protein POPTR_006G142600 [Populus trichocarpa]	ABP19A	Auxin-binding protein ABP19a OS=Prunus persica GN=ABP19A PE=3 SV=1	GO:0005618(cell wall);GO:0033609(oxalate metabolic process);GO:0046564(oxalate decarboxylase activity)	ENOG410YB6M(germin-like protein)	-	-	-	-	U5GAZ1.1 PF00190.20;Cupin_1;	no	no
TRINITY_DN11350_c1_g1	2598	TRINITY_DN11350_c1_g1_i1;TRINITY_DN11350_c1_g1_i2;TRINITY_DN11350_c1_g1_i3;TRINITY_DN11350_c1_g1_i4;TRINITY_DN11350_c1_g1_i5;TRINITY_DN11350_c1_g1_i6	2-methylene-furan-3-one reductase [Jatropha curcas]	At1g23740	Quinone oxidoreductase-like protein At1g23740, chloroplastic OS=Arabidopsis thaliana GN=At1g23740 PE=2 SV=2	GO:0008270(zinc ion binding);GO:0009409(response to cold);GO:0009507(chloroplast);GO:0009570(chloroplast stroma);GO:0009579(thylakoid);GO:0009941(chloroplast envelope);GO:0010319(stromule);GO:0035671(enone reductase activity);GO:0035798(2-alkenal reductas	COG0604(alcohol dehydrogenase)	NA	NA	NA	NA(NA)	F6HHU0.1 PF13602.4;ADH_zinc_N_2;	no	no
TRINITY_DN11353_c0_g1	848	TRINITY_DN11353_c0_g1_i1;TRINITY_DN11353_c0_g1_i2;TRINITY_DN11353_c0_g1_i3;TRINITY_DN11353_c0_g1_i4;TRINITY_DN11353_c0_g1_i5	18.5 kDa class I heat shock protein-like [Cicer arietinum]	HSP18.2	18.2 kDa class I heat shock protein OS=Medicago sativa GN=HSP18.2 PE=2 SV=1	GO:0003674(molecular_function);GO:0005737(cytoplasm);GO:0006979(response to oxidative stress);GO:0009408(response to heat);GO:0009644(response to high light intensity);GO:0042542(response to hydrogen peroxide)	COG0071(response to heat)	K13993	HSP20 family protein	-	cam04141(Protein processing in endoplasmic reticulum)	D6BR57.1 PF00011.19;HSP20;	no	no
TRINITY_DN11355_c0_g1	1041	TRINITY_DN11355_c0_g1_i1;TRINITY_DN11355_c0_g1_i2;TRINITY_DN11355_c0_g1_i3;TRINITY_DN11355_c0_g1_i4;TRINITY_DN11355_c0_g1_i5;TRINITY_DN11355_c0_g1_i6;TRINITY_DN11355_c0_g1_i7	60S ribosomal protein L11 [Jatropha curcas]	RPL11A	60S ribosomal protein L11-1 OS=Arabidopsis thaliana GN=RPL11A PE=2 SV=2	GO:0000027(ribosomal large subunit assembly);GO:0003735(structural constituent of ribosome);GO:0006412(translation);GO:0022625(cytosolic large ribosomal subunit)	COG0094(This is 1 of the proteins that binds and probably mediates the attachment of the 5S RNA into the large ribosomal subunit, where it forms part of the central protuberance. In the 70S ribosome it contacts protein S13 of the 30S subunit (bridge B1b),	K02868	large subunit ribosomal protein L11e	-	jcu03010(Ribosome)	B9R7U8.1 PF00673.19;Ribosomal_L5_C;	no	no
TRINITY_DN11363_c0_g4	2261	TRINITY_DN11363_c0_g4_i1	chaperonin CPN60-2, mitochondrial [Jatropha curcas]	CPN60-2	Chaperonin CPN60-2, mitochondrial OS=Cucurbita maxima GN=CPN60-2 PE=1 SV=1	GO:0005507(copper ion binding);GO:0005524(ATP binding);GO:0005739(mitochondrion);GO:0005759(mitochondrial matrix);GO:0005774(vacuolar membrane);GO:0005794(Golgi apparatus);GO:0005829(cytosol);GO:0006458('de novo' protein folding);GO:0007005(mitochondrion	COG0459(Prevents misfolding and promotes the refolding and proper assembly of unfolded polypeptides generated under stress conditions (By similarity))	K04077	chaperonin GroEL	-	jcu03018(RNA degradation)	A0A067K3N8.1 PF00118.22;Cpn60_TCP1;	no	no
TRINITY_DN11406_c0_g1	2208	TRINITY_DN11406_c0_g1_i1;TRINITY_DN11406_c0_g1_i10;TRINITY_DN11406_c0_g1_i11;TRINITY_DN11406_c0_g1_i2;TRINITY_DN11406_c0_g1_i3;TRINITY_DN11406_c0_g1_i4;TRINITY_DN11406_c0_g1_i5;TRINITY_DN11406_c0_g1_i6;TRINITY_DN11406_c0_g1_i7;TRINITY_DN11406_c0_g1_i8;TRI	2,3-bisphosphoglycerate-independent phosphoglycerate mutase [Manihot esculenta]	-	2,3-bisphosphoglycerate-independent phosphoglycerate mutase OS=Ricinus communis PE=1 SV=2	GO:0005737(cytoplasm);GO:0005740(mitochondrial envelope);GO:0005829(cytosol);GO:0005886(plasma membrane);GO:0006007(glucose catabolic process);GO:0006096(glycolytic process);GO:0009409(response to cold);GO:0009506(plasmodesma);GO:0009507(chloroplast);GO:0	COG0696(Catalyzes the interconversion of 2-phosphoglycerate and 3-phosphoglycerate (By similarity))	K15633	2,3-bisphosphoglycerate-independent phosphoglycerate mutase	EC:5.4.2.12	jcu00010(Glycolysis / Gluconeogenesis);jcu00260(Glycine, serine and threonine metabolism)	B9S1V6.1 PF01676.16;Metalloenzyme;	no	no
TRINITY_DN11415_c1_g1	1399	TRINITY_DN11415_c1_g1_i1;TRINITY_DN11415_c1_g1_i2;TRINITY_DN11415_c1_g1_i3;TRINITY_DN11415_c1_g1_i4;TRINITY_DN11415_c1_g1_i5;TRINITY_DN11415_c1_g1_i6;TRINITY_DN11415_c1_g1_i7;TRINITY_DN11415_c1_g1_i8	40S ribosomal protein SA [Jatropha curcas]	179B	40S ribosomal protein SA OS=Daucus carota GN=179B PE=2 SV=1	GO:0000028(ribosomal small subunit assembly);GO:0000447(endonucleolytic cleavage in ITS1 to separate SSU-rRNA from 5.8S rRNA and LSU-rRNA from tricistronic rRNA transcript (SSU-rRNA, 5.8S rRNA, LSU-rRNA));GO:0000461(endonucleolytic cleavage to generate ma	COG0052(30S ribosomal protein S2)	K02998	small subunit ribosomal protein SAe	-	jcu03010(Ribosome)	G8A187.1 PF00318.18;Ribosomal_S2;	no	no
TRINITY_DN11420_c1_g3	4686	TRINITY_DN11420_c1_g3_i1	photosystem II CP43 chlorophyll apoprotein (chloroplast) [Passiflora edulis]	psbC	Photosystem II CP43 reaction center protein OS=Cucumis sativus GN=psbC PE=3 SV=1	GO:0009536(plastid)	ENOG410XQVF(Photosystem II)	K02705	photosystem II CP43 chlorophyll apoprotein	-	ccaj00195(Photosynthesis)	H6CSR4.1 PF00421.17;PSII;	no	no
TRINITY_DN11426_c0_g2	723	TRINITY_DN11426_c0_g2_i1;TRINITY_DN11426_c0_g2_i2	serine--tRNA ligase [Jatropha curcas]	-	Serine--tRNA ligase OS=Helianthus annuus PE=2 SV=1	GO:0004828(serine-tRNA ligase activity);GO:0005737(cytoplasm);GO:0006434(seryl-tRNA aminoacylation)	COG0172(Catalyzes the attachment of serine to tRNA(Ser). Is also able to aminoacylate tRNA(Sec) with serine, to form the misacylated tRNA L-seryl-tRNA(Sec), which will be further converted into selenocysteinyl-tRNA(Sec) (By similarity))	K01875	seryl-tRNA synthetase	EC:6.1.1.11	jcu00970(Aminoacyl-tRNA biosynthesis)	M5VY64.1 PF02403.20;Seryl_tRNA_N;	no	no
TRINITY_DN11428_c0_g3	3187	TRINITY_DN11428_c0_g3_i1;TRINITY_DN11428_c0_g3_i2	pre-mRNA-splicing factor SYF1-like [Manihot esculenta]	Xab2	Pre-mRNA-splicing factor SYF1 OS=Mus musculus GN=Xab2 PE=1 SV=1	GO:0000349(generation of catalytic spliceosome for first transesterification step);GO:0000974(Prp19 complex);GO:0071010(prespliceosome);GO:0071012(catalytic step 1 spliceosome);GO:0071013(catalytic step 2 spliceosome);GO:0071014(post-mRNA release spliceos	ENOG410XPD9(pre-mRNA-splicing factor SYF1)	K12867	pre-mRNA-splicing factor SYF1	-	hbr03040(Spliceosome)	A0A022QK02.1 PF13429.4;TPR_15;	no	no
TRINITY_DN11435_c0_g1	1581	TRINITY_DN11435_c0_g1_i1;TRINITY_DN11435_c0_g1_i2;TRINITY_DN11435_c0_g1_i3;TRINITY_DN11435_c0_g1_i4	ricin B-like lectin R40G3 [Ricinus communis]	EULS3	Ricin B-like lectin EULS3 OS=Arabidopsis thaliana GN=EULS3 PE=1 SV=1	GO:0005515(protein binding);GO:0005634(nucleus);GO:0005737(cytoplasm);GO:0030246(carbohydrate binding);GO:0042742(defense response to bacterium);GO:0090332(stomatal closure)	ENOG410YRN6(Stress responsive protein)	-	-	-	-	A0A078C9S1.1 PF14200.4;RicinB_lectin_2;	no	no
TRINITY_DN11435_c0_g2	2251	TRINITY_DN11435_c0_g2_i1;TRINITY_DN11435_c0_g2_i2	aspartyl protease AED3 [Ricinus communis]	AED3	Aspartyl protease AED3 OS=Arabidopsis thaliana GN=AED3 PE=1 SV=1	GO:0004190(aspartic-type endopeptidase activity);GO:0006508(proteolysis);GO:0030163(protein catabolic process)	ENOG410XNV7(aspartic)	NA	NA	NA	NA(NA)	A0A067L7Q3.1 PF14543.4;TAXi_N;	no	no
TRINITY_DN11435_c0_g3	1203	TRINITY_DN11435_c0_g3_i1;TRINITY_DN11435_c0_g3_i2;TRINITY_DN11435_c0_g3_i3	ricin B-like lectin R40G3 isoform X3 [Populus trichocarpa]	EULS3	Ricin B-like lectin EULS3 OS=Arabidopsis thaliana GN=EULS3 PE=1 SV=1	GO:0005515(protein binding);GO:0005634(nucleus);GO:0005737(cytoplasm);GO:0030246(carbohydrate binding);GO:0042742(defense response to bacterium);GO:0090332(stomatal closure)	ENOG410YRN6(Stress responsive protein)	-	-	-	-	A0A078C9S1.1 PF14200.4;RicinB_lectin_2;	no	no
TRINITY_DN10293_c1_g5	2004	TRINITY_DN10293_c1_g5_i1	ATP synthase CF1 beta subunit (chloroplast) [Passiflora edulis]	atpB	ATP synthase subunit beta, chloroplastic OS=Manihot esculenta GN=atpB PE=3 SV=1	GO:0009536(plastid)	COG0055(Produces ATP from ADP in the presence of a proton gradient across the membrane. The catalytic sites are hosted primarily by the beta subunits (By similarity))	K02112	F-type H+-transporting ATPase subunit beta	EC:3.6.3.14	vvi00190(Oxidative phosphorylation);vvi00195(Photosynthesis)	A0A096TUT3.1 PF00006.23;ATP-synt_ab;	no	no
TRINITY_DN11464_c0_g2	1846	TRINITY_DN11464_c0_g2_i1;TRINITY_DN11464_c0_g2_i2;TRINITY_DN11464_c0_g2_i3;TRINITY_DN11464_c0_g2_i4	PREDICTED: probable ADP-ribosylation factor GTPase-activating protein AGD8 [Populus euphratica]	AGD8	Probable ADP-ribosylation factor GTPase-activating protein AGD8 OS=Arabidopsis thaliana GN=AGD8 PE=1 SV=1	GO:0003677(DNA binding);GO:0005096(GTPase activator activity);GO:0005634(nucleus);GO:0005829(cytosol);GO:0046872(metal ion binding)	COG5347(domain, ankyrin repeat and PH domain)	K12493	ADP-ribosylation factor GTPase-activating protein 2/3	-	rcu04144(Endocytosis)	M0SSZ9.1 PF01412.16;ArfGap;	no	no
TRINITY_DN11479_c0_g5	1277	TRINITY_DN11479_c0_g5_i1;TRINITY_DN11479_c0_g5_i2;TRINITY_DN11479_c0_g5_i3;TRINITY_DN11479_c0_g5_i4;TRINITY_DN11479_c0_g5_i5;TRINITY_DN11479_c0_g5_i6;TRINITY_DN11479_c0_g5_i7;TRINITY_DN11479_c0_g5_i8;TRINITY_DN11479_c0_g5_i9	PREDICTED: oxygen-evolving enhancer protein 2, chloroplastic-like [Populus euphratica]	PSBP	Oxygen-evolving enhancer protein 2, chloroplastic OS=Pisum sativum GN=PSBP PE=1 SV=1	GO:0005509(calcium ion binding);GO:0008266(poly(U) RNA binding);GO:0009507(chloroplast);GO:0009534(chloroplast thylakoid);GO:0009535(chloroplast thylakoid membrane);GO:0009543(chloroplast thylakoid lumen);GO:0009570(chloroplast stroma);GO:0009579(thylakoi	ENOG4110ARY(Oxygen-evolving enhancer protein 2)	K02717	photosystem II oxygen-evolving enhancer protein 2	-	ghi00195(Photosynthesis)	A9PGP9.1 PF01789.14;PsbP;	down	yes
TRINITY_DN11483_c1_g3	3750	TRINITY_DN11483_c1_g3_i1;TRINITY_DN11483_c1_g3_i2;TRINITY_DN11483_c1_g3_i3	PREDICTED: villin-3-like isoform X1 [Populus euphratica]	VLN2	Villin-2 OS=Arabidopsis thaliana GN=VLN2 PE=1 SV=2	GO:0003779(actin binding);GO:0005515(protein binding);GO:0005737(cytoplasm);GO:0005829(cytosol);GO:0005856(cytoskeleton);GO:0007010(cytoskeleton organization);GO:0051015(actin filament binding);GO:0051017(actin filament bundle assembly);GO:0051693(actin f	ENOG410XR0A(capping protein (actin filament) gelsolin-like)	NA	NA	NA	NA(NA)	D7THV1.1 PF00626.20;Gelsolin;	no	no
TRINITY_DN11484_c0_g4	1437	TRINITY_DN11484_c0_g4_i1;TRINITY_DN11484_c0_g4_i2;TRINITY_DN11484_c0_g4_i3	NADH-cytochrome b5 reductase-like protein isoform X1 [Hevea brasiliensis]	CBR2	NADH-cytochrome b5 reductase-like protein OS=Arabidopsis thaliana GN=CBR2 PE=1 SV=2	GO:0004128(cytochrome-b5 reductase activity, acting on NAD(P)H);GO:0005507(copper ion binding);GO:0005739(mitochondrion);GO:0005758(mitochondrial intermembrane space);GO:0005794(Golgi apparatus);GO:0009505(plant-type cell wall);GO:0009651(response to salt	COG0543(cytochrome-b5 reductase activity, acting on NAD(P)H)	K00326	cytochrome-b5 reductase	EC:1.6.2.2	hbr00520(Amino sugar and nucleotide sugar metabolism)	B9HCP8.2 PF00175.19;NAD_binding_1;	no	no
TRINITY_DN11536_c0_g2	1593	TRINITY_DN11536_c0_g2_i1;TRINITY_DN11536_c0_g2_i2;TRINITY_DN11536_c0_g2_i3;TRINITY_DN11536_c0_g2_i4	malate dehydrogenase, glyoxysomal [Ricinus communis]	-	Malate dehydrogenase, glyoxysomal OS=Citrullus lanatus PE=1 SV=1	GO:0005737(cytoplasm);GO:0005777(peroxisome);GO:0006097(glyoxylate cycle);GO:0006099(tricarboxylic acid cycle);GO:0006108(malate metabolic process);GO:0009507(chloroplast);GO:0016615(malate dehydrogenase activity);GO:0030060(L-malate dehydrogenase activit	COG0039(Catalyzes the reversible oxidation of malate to oxaloacetate (By similarity))	K00026	malate dehydrogenase	EC:1.1.1.37	rcu00020(Citrate cycle (TCA cycle));rcu00620(Pyruvate metabolism);rcu00630(Glyoxylate and dicarboxylate metabolism);rcu00710(Carbon fixation in photosynthetic organisms);rcu00270(Cysteine and methionine metabolism)	B9T172.1 PF02866.16;Ldh_1_C;	no	no
TRINITY_DN11546_c0_g3	1930	TRINITY_DN11546_c0_g3_i1;TRINITY_DN11546_c0_g3_i2	methyl-CpG-binding domain-containing protein 11 [Ricinus communis]	MBD10	Methyl-CpG-binding domain-containing protein 10 OS=Arabidopsis thaliana GN=MBD10 PE=1 SV=1	GO:0003677(DNA binding);GO:0005634(nucleus);GO:0005829(cytosol);GO:0006351(transcription, DNA-templated);GO:0006355(regulation of transcription, DNA-templated);GO:0008327(methyl-CpG binding)	ENOG410YRVP(methyl-CpG binding)	-	-	-	-	W1NE73.1 PF01429.17;MBD;	no	no
TRINITY_DN11547_c0_g2	1600	TRINITY_DN11547_c0_g2_i1;TRINITY_DN11547_c0_g2_i2;TRINITY_DN11547_c0_g2_i3	PREDICTED: phosphoserine aminotransferase 2, chloroplastic-like [Populus euphratica]	PSAT1	Phosphoserine aminotransferase 1, chloroplastic OS=Arabidopsis thaliana GN=PSAT1 PE=1 SV=1	GO:0004648(O-phospho-L-serine:2-oxoglutarate aminotransferase activity)	COG1932(Catalyzes the reversible conversion of 3- phosphohydroxypyruvate to phosphoserine and of 3-hydroxy-2-oxo-4- phosphonooxybutanoate to phosphohydroxythreonine (By similarity))	K00831	phosphoserine aminotransferase	EC:2.6.1.52	hbr00260(Glycine, serine and threonine metabolism);hbr00750(Vitamin B6 metabolism)	B9H657.2 PF00266.17;Aminotran_5;	no	no
TRINITY_DN11551_c0_g6	1573	TRINITY_DN11551_c0_g6_i1	PREDICTED: proteasome subunit alpha type-4 [Gossypium raimondii]	PAC1	Proteasome subunit alpha type-4 OS=Spinacia oleracea GN=PAC1 PE=2 SV=1	GO:0000502(proteasome complex);GO:0004298(threonine-type endopeptidase activity);GO:0005634(nucleus);GO:0005773(vacuole);GO:0005829(cytosol);GO:0005839(proteasome core complex);GO:0006511(ubiquitin-dependent protein catabolic process);GO:0008233(peptidase	COG0638(The proteasome is a multicatalytic proteinase complex which is characterized by its ability to cleave peptides with Arg, Phe, Tyr, Leu, and Glu adjacent to the leaving group at neutral or slightly basic pH. The proteasome has an ATP-dependent prot	K02728	20S proteasome subunit alpha 3	EC:3.4.25.1	gra03050(Proteasome)	I1KKK1.1 PF00227.24;Proteasome;	no	no
TRINITY_DN11568_c0_g4	2399	TRINITY_DN11568_c0_g4_i1;TRINITY_DN11568_c0_g4_i2;TRINITY_DN11568_c0_g4_i3	PREDICTED: trigger factor-like protein TIG, Chloroplastic [Populus euphratica]	TIG	Trigger factor-like protein TIG, Chloroplastic OS=Arabidopsis thaliana GN=TIG PE=1 SV=1	GO:0003755(peptidyl-prolyl cis-trans isomerase activity);GO:0006457(protein folding);GO:0009507(chloroplast);GO:0009570(chloroplast stroma);GO:0009941(chloroplast envelope);GO:0015031(protein transport)	COG0544(Involved in protein export. Acts as a chaperone by maintaining the newly synthesized protein in an open conformation)	NA	NA	NA	NA(NA)	B9IEG6.1 PF05698.12;Trigger_C;	no	no
TRINITY_DN10327_c0_g6	1926	TRINITY_DN10327_c0_g6_i1;TRINITY_DN10327_c0_g6_i2	chaperone protein dnaJ A6, chloroplastic [Jatropha curcas]	DJA6	Chaperone protein dnaJ A6, chloroplastic OS=Arabidopsis thaliana GN=DJA6 PE=2 SV=2	GO:0005524(ATP binding);GO:0005739(mitochondrion);GO:0006457(protein folding);GO:0009408(response to heat);GO:0009507(chloroplast);GO:0009535(chloroplast thylakoid membrane);GO:0009941(chloroplast envelope);GO:0031072(heat shock protein binding);GO:004687	COG0484(ATP binding to DnaK triggers the release of the substrate protein, thus completing the reaction cycle. Several rounds of ATP-dependent interactions between DnaJ, DnaK and GrpE are required for fully efficient folding. Also involved, together with	NA	NA	NA	NA(NA)	A0A059A7T3.1 PF01556.16;DnaJ_C;	no	no
TRINITY_DN11615_c1_g2	1733	TRINITY_DN11615_c1_g2_i1	transcription factor VIP1-like [Manihot esculenta]	VIP1	Transcription factor VIP1 OS=Arabidopsis thaliana GN=VIP1 PE=1 SV=1	GO:0003700(DNA binding transcription factor activity);GO:0005634(nucleus)	ENOG410YA2S(Transcription factor)	K20557	transcription factor VIP1	-	ghi04016(MAPK signaling pathway - plant)	A0A072V2G2.1 PF00170.19;bZIP_1;	no	no
TRINITY_DN11618_c1_g3	716	TRINITY_DN11618_c1_g3_i1;TRINITY_DN11618_c1_g3_i2;TRINITY_DN11618_c1_g3_i3	hypothetical protein PHAVU_002G233500g, partial [Phaseolus vulgaris]	RPL38A	60S ribosomal protein L38 OS=Arabidopsis thaliana GN=RPL38A PE=3 SV=1	GO:0003723(RNA binding);GO:0003735(structural constituent of ribosome);GO:0006412(translation);GO:0022618(ribonucleoprotein complex assembly);GO:0022625(cytosolic large ribosomal subunit)	ENOG4112229(Ribosomal protein L38)	K02923	large subunit ribosomal protein L38e	-	pvu03010(Ribosome)	M0RFA2.1 PF01781.16;Ribosomal_L38e;	no	no
TRINITY_DN11632_c0_g1	1058	TRINITY_DN11632_c0_g1_i1	C2 calcium-dependent membrane targeting [Macleaya cordata]	-	-	GO:0003674(molecular_function);GO:0005575(cellular_component);GO:0008150(biological_process)	ENOG410YIGG(C2 domain-containing protein)	NA	NA	NA	NA(NA)	M1AMV5.1 PF00168.28;C2;	no	no
TRINITY_DN11634_c0_g1	3013	TRINITY_DN11634_c0_g1_i1;TRINITY_DN11634_c0_g1_i10;TRINITY_DN11634_c0_g1_i11;TRINITY_DN11634_c0_g1_i12;TRINITY_DN11634_c0_g1_i13;TRINITY_DN11634_c0_g1_i14;TRINITY_DN11634_c0_g1_i15;TRINITY_DN11634_c0_g1_i16;TRINITY_DN11634_c0_g1_i2;TRINITY_DN11634_c0_g1_i	uncharacterized oxidoreductase At1g06690, chloroplastic [Populus trichocarpa]	At1g06690	Uncharacterized oxidoreductase At1g06690, chloroplastic OS=Arabidopsis thaliana GN=At1g06690 PE=1 SV=1	GO:0004033(aldo-keto reductase (NADP) activity);GO:0005737(cytoplasm);GO:0008270(zinc ion binding);GO:0009507(chloroplast);GO:0009535(chloroplast thylakoid membrane);GO:0009941(chloroplast envelope);GO:0010287(plastoglobule);GO:0016491(oxidoreductase acti	COG0667(Aldo keto reductase)	K05275	pyridoxine 4-dehydrogenase	EC:1.1.1.65	mus00750(Vitamin B6 metabolism)	M5WU68.1 PF00248.19;Aldo_ket_red;	no	no
TRINITY_DN11663_c1_g8	2829	TRINITY_DN11663_c1_g8_i1;TRINITY_DN11663_c1_g8_i2	hypothetical protein VITISV_025150 [Vitis vinifera]	RNP1	Heterogeneous nuclear ribonucleoprotein 1 OS=Arabidopsis thaliana GN=RNP1 PE=1 SV=1	GO:0003723(RNA binding);GO:0003729(mRNA binding);GO:0005634(nucleus);GO:0005681(spliceosomal complex);GO:0005829(cytosol);GO:0006397(mRNA processing);GO:0008380(RNA splicing);GO:0010228(vegetative to reproductive phase transition of meristem);GO:0051028(m	ENOG410YA8Z(Rna-binding protein)	K14411	RNA-binding protein Musashi	-	vvi03015(mRNA surveillance pathway)	A0A022PVM0.1 PF00076.20;RRM_1;	no	no
TRINITY_DN10345_c0_g1	1266	TRINITY_DN10345_c0_g1_i1;TRINITY_DN10345_c0_g1_i2	mitochondrial ADP/ATP translocator protein [Klebsormidium nitens]	ABT	ADP,ATP carrier protein OS=Chlamydomonas reinhardtii GN=ABT PE=2 SV=1	GO:0003735(structural constituent of ribosome);GO:0006412(translation)	ENOG410XNW0(transmembrane transport)	NA	NA	NA	NA(NA)	I2G6Q6.1 PF00153.25;Mito_carr;	no	no
TRINITY_DN11684_c0_g3	1442	TRINITY_DN11684_c0_g3_i1;TRINITY_DN11684_c0_g3_i2;TRINITY_DN11684_c0_g3_i3;TRINITY_DN11684_c0_g3_i4;TRINITY_DN11684_c0_g3_i5;TRINITY_DN11684_c0_g3_i6	PREDICTED: 28 kDa ribonucleoprotein, chloroplastic-like [Populus euphratica]	CP33	RNA-binding protein CP33, chloroplastic OS=Arabidopsis thaliana GN=CP33 PE=2 SV=1	GO:0003723(RNA binding);GO:0003729(mRNA binding);GO:0005634(nucleus);GO:0008150(biological_process);GO:0009507(chloroplast);GO:0009570(chloroplast stroma);GO:0009941(chloroplast envelope)	COG0724(Rna-binding protein)	K13126	polyadenylate-binding protein	-	rcu03013(RNA transport);rcu03015(mRNA surveillance pathway);rcu03018(RNA degradation)	A0A067JWQ8.1 PF00076.20;RRM_1;	no	no
TRINITY_DN11690_c0_g1	836	TRINITY_DN11690_c0_g1_i1;TRINITY_DN11690_c0_g1_i2;TRINITY_DN11690_c0_g1_i3;TRINITY_DN11690_c0_g1_i4;TRINITY_DN11690_c0_g1_i5;TRINITY_DN11690_c0_g1_i6	uncharacterized protein LOC110809579 [Carica papaya]	-	-	GO:0005576(extracellular region);GO:0005773(vacuole);GO:0008150(biological_process)	ENOG410YN13(Protein of unknown function, DUF538)	-	-	-	-	M5W1G2.1 PF04398.10;DUF538;	no	no
TRINITY_DN11690_c0_g2	823	TRINITY_DN11690_c0_g2_i1	uncharacterized protein LOC110809579 [Carica papaya]	-	-	GO:0005576(extracellular region);GO:0005773(vacuole);GO:0008150(biological_process)	ENOG410YN13(Protein of unknown function, DUF538)	-	-	-	-	W9RQ50.1 PF04398.10;DUF538;	no	no
TRINITY_DN11697_c0_g1	3629	TRINITY_DN11697_c0_g1_i1;TRINITY_DN11697_c0_g1_i2;TRINITY_DN11697_c0_g1_i3;TRINITY_DN11697_c0_g1_i4;TRINITY_DN11697_c0_g1_i5	PREDICTED: trihelix transcription factor GTL1-like isoform X4 [Populus euphratica]	GTL1	Trihelix transcription factor GTL1 OS=Arabidopsis thaliana GN=GTL1 PE=1 SV=2	GO:0003677(DNA binding);GO:0003700(DNA binding transcription factor activity);GO:0005634(nucleus);GO:0006351(transcription, DNA-templated);GO:0006355(regulation of transcription, DNA-templated)	ENOG410YYXY(Transcription factor)	K01051	pectinesterase	EC:3.1.1.11	var00040(Pentose and glucuronate interconversions)	V4SWV0.1 PF13837.4;Myb_DNA-bind_4;	no	no
TRINITY_DN11703_c0_g2	759	TRINITY_DN11703_c0_g2_i1	miraculin-like protein, partial [Passiflora edulis]	-	-	-	-	-	-	-	-	-	no	no
TRINITY_DN11716_c0_g6	876	TRINITY_DN11716_c0_g6_i1	hypothetical protein CDL15_Pgr015516 [Punica granatum]	-	Profilin-5 OS=Corylus avellana PE=1 SV=1	GO:0003785(actin monomer binding);GO:0005938(cell cortex);GO:0015629(actin cytoskeleton);GO:0042989(sequestering of actin monomers)	ENOG41126PD(Binds to actin and affects the structure of the cytoskeleton. At high concentrations, profilin prevents the polymerization of actin, whereas it enhances it at low concentrations (By)	NA	NA	NA	NA(NA)	Q8VWR0.1 PF00235.17;Profilin;	down	yes
TRINITY_DN11716_c0_g8	990	TRINITY_DN11716_c0_g8_i1	unknown [Populus trichocarpa x Populus deltoides]	rps7-A	30S ribosomal protein S7, chloroplastic OS=Acorus americanus GN=rps7-A PE=3 SV=1	GO:0000028(ribosomal small subunit assembly);GO:0003729(mRNA binding);GO:0003735(structural constituent of ribosome);GO:0005840(ribosome);GO:0006412(translation);GO:0019843(rRNA binding)	COG0049(One of the primary rRNA binding proteins, it binds directly to 16S rRNA where it nucleates assembly of the head domain of the 30S subunit. Is located at the subunit interface close to the decoding center, probably blocks exit of the E-site tRNA (B	K02992	small subunit ribosomal protein S7	-	rcu03010(Ribosome)	U5GIT3.1 PF00177.19;Ribosomal_S7;	no	no
TRINITY_DN11728_c0_g2	922	TRINITY_DN11728_c0_g2_i1;TRINITY_DN11728_c0_g2_i2;TRINITY_DN11728_c0_g2_i3;TRINITY_DN11728_c0_g2_i4;TRINITY_DN11728_c0_g2_i5;TRINITY_DN11728_c0_g2_i6;TRINITY_DN11728_c0_g2_i7;TRINITY_DN11728_c0_g2_i8	miraculin-like protein, partial [Passiflora edulis]	-	-	-	-	-	-	-	-	-	up	yes
TRINITY_DN11728_c0_g3	844	TRINITY_DN11728_c0_g3_i1	miraculin-like protein, partial [Passiflora edulis]	-	-	-	-	-	-	-	-	-	no	no
TRINITY_DN11729_c1_g4	1966	TRINITY_DN11729_c1_g4_i1;TRINITY_DN11729_c1_g4_i2;TRINITY_DN11729_c1_g4_i3	PREDICTED: uncharacterized protein LOC105125506 isoform X1 [Populus euphratica]	-	-	-	ENOG410Z6YY(NA)	-	-	-	-	-	no	no
TRINITY_DN11737_c0_g3	1885	TRINITY_DN11737_c0_g3_i1;TRINITY_DN11737_c0_g3_i2	membrane steroid-binding protein 1 [Populus trichocarpa]	MSBP2	Membrane steroid-binding protein 2 OS=Arabidopsis thaliana GN=MSBP2 PE=1 SV=1	GO:0012505(endomembrane system);GO:0016020(membrane);GO:0020037(heme binding)	ENOG4111UG0(progesterone receptor membrane component)	NA	NA	NA	NA(NA)	W9RWR8.1 PF00173.26;Cyt-b5;	no	no
TRINITY_DN11763_c0_g1	1310	TRINITY_DN11763_c0_g1_i1;TRINITY_DN11763_c0_g1_i2	uncharacterized protein LOC110826025 [Carica papaya]	-	-	-	ENOG41122DF(NA)	-	-	-	-	A0A0J8FCH1.1 PF07468.9;Agglutinin;	up	yes
TRINITY_DN11768_c0_g2	804	TRINITY_DN11768_c0_g2_i1	60S ribosomal protein L17-2-like [Durio zibethinus]	RPL17B	60S ribosomal protein L17-2 OS=Arabidopsis thaliana GN=RPL17B PE=2 SV=2	GO:0003735(structural constituent of ribosome);GO:0005730(nucleolus);GO:0005737(cytoplasm);GO:0005773(vacuole);GO:0005794(Golgi apparatus);GO:0005829(cytosol);GO:0005840(ribosome);GO:0006412(translation);GO:0009506(plasmodesma);GO:0015934(large ribosomal	COG0091(The globular domain of the protein is located near the polypeptide exit tunnel on the outside of the subunit, while an extended beta-hairpin is found that lines the wall of the exit tunnel in the center of the 70S ribosome (By similarity))	K02880	large subunit ribosomal protein L17e	-	tcc03010(Ribosome)	A0A0J8C136.1 PF00237.17;Ribosomal_L22;	no	no
TRINITY_DN11788_c2_g3	2412	TRINITY_DN11788_c2_g3_i1;TRINITY_DN11788_c2_g3_i2;TRINITY_DN11788_c2_g3_i3;TRINITY_DN11788_c2_g3_i4	PREDICTED: plasminogen activator inhibitor 1 RNA-binding protein [Vitis vinifera]	RGGB	RGG repeats nuclear RNA binding protein B OS=Arabidopsis thaliana GN=RGGB PE=1 SV=1	GO:0003723(RNA binding);GO:0003729(mRNA binding);GO:0005634(nucleus);GO:0005777(peroxisome);GO:0005829(cytosol);GO:0009735(response to cytokinin);GO:0048471(perinuclear region of cytoplasm)	ENOG410YBHR(SERPINE1 mRNA binding protein 1)	NA	NA	NA	NA(NA)	A0A0D2R606.1 PF04774.13;HABP4_PAI-RBP1;	no	no
TRINITY_DN11795_c0_g6	927	TRINITY_DN11795_c0_g6_i1	thylakoid lumenal 17.4 kDa protein, chloroplastic [Quercus suber]	TL17	Thylakoid lumenal 17.4 kDa protein, chloroplastic OS=Arabidopsis thaliana GN=TL17 PE=1 SV=2	-	ENOG4111SC3(thylakoid lumenal 17.4 kDa protein)	-	-	-	-	-	no	no
TRINITY_DN11797_c0_g1	1745	TRINITY_DN11797_c0_g1_i1	stomatin-like protein 2, mitochondrial [Hevea brasiliensis]	Stoml2	Stomatin-like protein 2, mitochondrial OS=Mus musculus GN=Stoml2 PE=1 SV=1	GO:0005739(mitochondrion);GO:0008270(zinc ion binding);GO:0016020(membrane);GO:0097250(mitochondrial respiratory chain supercomplex assembly)	COG0330(Band 7 protein)	NA	NA	NA	NA(NA)	A0A0B0NLB7.1 PF01145.23;Band_7;	no	no
TRINITY_DN11799_c0_g3	1914	TRINITY_DN11799_c0_g3_i1;TRINITY_DN11799_c0_g3_i2;TRINITY_DN11799_c0_g3_i3	phosphoglycerate kinase, cytosolic-like [Sesamum indicum]	-	Phosphoglycerate kinase, cytosolic OS=Nicotiana tabacum PE=2 SV=1	GO:0002237(response to molecule of bacterial origin);GO:0004618(phosphoglycerate kinase activity);GO:0004672(protein kinase activity);GO:0005524(ATP binding);GO:0005634(nucleus);GO:0005737(cytoplasm);GO:0005774(vacuolar membrane);GO:0005794(Golgi apparatu	COG0126(phosphoglycerate kinase)	K00927	phosphoglycerate kinase	EC:2.7.2.3	sind00010(Glycolysis / Gluconeogenesis);sind00710(Carbon fixation in photosynthetic organisms)	B9HY30.1 PF00162.17;PGK;	no	no
TRINITY_DN11799_c0_g7	1593	TRINITY_DN11799_c0_g7_i1	phosphoglycerate kinase, cytosolic [Populus trichocarpa]	-	Phosphoglycerate kinase, cytosolic OS=Nicotiana tabacum PE=2 SV=1	GO:0002237(response to molecule of bacterial origin);GO:0004618(phosphoglycerate kinase activity);GO:0004672(protein kinase activity);GO:0005524(ATP binding);GO:0005634(nucleus);GO:0005737(cytoplasm);GO:0005774(vacuolar membrane);GO:0005794(Golgi apparatu	COG0126(phosphoglycerate kinase)	K00927	phosphoglycerate kinase	EC:2.7.2.3	jcu00010(Glycolysis / Gluconeogenesis);jcu00710(Carbon fixation in photosynthetic organisms)	B9HY30.1 PF00162.17;PGK;	no	no
TRINITY_DN11811_c0_g4	1535	TRINITY_DN11811_c0_g4_i1	60S ribosomal protein L4 [Manihot esculenta]	RPL4	60S ribosomal protein L4 OS=Prunus armeniaca GN=RPL4 PE=2 SV=1	GO:0003735(structural constituent of ribosome);GO:0022625(cytosolic large ribosomal subunit)	COG0088(One of the primary rRNA binding proteins, this protein initially binds near the 5'-end of the 23S rRNA. It is important during the early stages of 50S assembly. It makes multiple contacts with different domains of the 23S rRNA in the assembled 50S	K02930	large subunit ribosomal protein L4e	-	hbr03010(Ribosome)	B9SGS2.1 PF00573.20;Ribosomal_L4;	no	no
TRINITY_DN11814_c0_g7	2083	TRINITY_DN11814_c0_g7_i1;TRINITY_DN11814_c0_g7_i2	hypothetical protein POPTR_007G107300 [Populus trichocarpa]	PME51	Probable pectinesterase/pectinesterase inhibitor 51 OS=Arabidopsis thaliana GN=PME51 PE=2 SV=1	GO:0030599(pectinesterase activity);GO:0046910(pectinesterase inhibitor activity);GO:0071944(cell periphery)	COG4677(pectinesterase)	K01051	pectinesterase	EC:3.1.1.11	smo00040(Pentose and glucuronate interconversions)	B9H471.2 PF01095.17;Pectinesterase;	no	no
TRINITY_DN11826_c0_g2	1301	TRINITY_DN11826_c0_g2_i1;TRINITY_DN11826_c0_g2_i2	photosynthetic NDH subunit of lumenal location 5, chloroplastic isoform X2 [Jatropha curcas]	PNSL5	Photosynthetic NDH subunit of lumenal location 5, chloroplastic OS=Arabidopsis thaliana GN=PNSL5 PE=1 SV=1	GO:0003755(peptidyl-prolyl cis-trans isomerase activity)	ENOG410Z0G4(PPIases accelerate the folding of proteins (By similarity))	NA	NA	NA	NA(NA)	Q75M32.1 PF00160.19;Pro_isomerase;	no	no
TRINITY_DN11830_c0_g3	2040	TRINITY_DN11830_c0_g3_i1;TRINITY_DN11830_c0_g3_i2	probable amidase At4g34880 isoform X1 [Citrus sinensis]	SPAC869.01	Putative amidase C869.01 OS=Schizosaccharomyces pombe (strain 972 / ATCC 24843) GN=SPAC869.01 PE=3 SV=1	GO:0004040(amidase activity)	COG0154(Allows the formation of correctly charged Gln-tRNA(Gln) through the transamidation of misacylated Glu-tRNA(Gln) in organisms which lack glutaminyl-tRNA synthetase. The reaction takes place in the presence of glutamine and ATP through an activated	K01426	amidase	EC:3.5.1.4	cic00330(Arginine and proline metabolism);cic00360(Phenylalanine metabolism);cic00380(Tryptophan metabolism)	B9SQK5.1 PF01425.19;Amidase;	no	no
TRINITY_DN10375_c1_g1	1295	TRINITY_DN10375_c1_g1_i1	uncharacterized protein LOC110626779 [Manihot esculenta]	Dml	2,3-dimethylmalate lyase OS=Eubacterium barkeri GN=Dml PE=1 SV=1	GO:0005737(cytoplasm);GO:0006097(glyoxylate cycle);GO:0046912(transferase activity, transferring acyl groups, acyl groups converted into alkyl on transfer)	COG2513(methylisocitrate lyase)	-	-	-	-	A0A061ERJ7.1 PF13714.4;PEP_mutase;	up	yes
TRINITY_DN10375_c1_g3	2360	TRINITY_DN10375_c1_g3_i1;TRINITY_DN10375_c1_g3_i2;TRINITY_DN10375_c1_g3_i3	uncharacterized protein LOC110643581 [Hevea brasiliensis]	Dml	2,3-dimethylmalate lyase OS=Eubacterium barkeri GN=Dml PE=1 SV=1	GO:0005737(cytoplasm);GO:0006097(glyoxylate cycle);GO:0046912(transferase activity, transferring acyl groups, acyl groups converted into alkyl on transfer)	COG2513(methylisocitrate lyase)	-	-	-	-	A0A061ERJ7.1 PF13714.4;PEP_mutase;	no	no
TRINITY_DN11834_c0_g6	1490	TRINITY_DN11834_c0_g6_i1;TRINITY_DN11834_c0_g6_i2	cysteine synthase-like isoform X1 [Quercus suber]	-	Cysteine synthase OS=Citrullus lanatus PE=1 SV=1	GO:0004124(cysteine synthase activity);GO:0005737(cytoplasm);GO:0006535(cysteine biosynthetic process from serine);GO:0030170(pyridoxal phosphate binding)	COG0031(cysteine biosynthetic process from serine)	K01738	cysteine synthase	EC:2.5.1.47	pxb00920(Sulfur metabolism);pxb00270(Cysteine and methionine metabolism)	B9HJY5.1 PF00291.23;PALP;	no	no
TRINITY_DN11841_c0_g1	1896	TRINITY_DN11841_c0_g1_i1;TRINITY_DN11841_c0_g1_i10;TRINITY_DN11841_c0_g1_i2;TRINITY_DN11841_c0_g1_i3;TRINITY_DN11841_c0_g1_i4;TRINITY_DN11841_c0_g1_i5;TRINITY_DN11841_c0_g1_i6;TRINITY_DN11841_c0_g1_i7;TRINITY_DN11841_c0_g1_i8;TRINITY_DN11841_c0_g1_i9	PREDICTED: glutamate dehydrogenase 2 [Nelumbo nucifera]	GDH2	Glutamate dehydrogenase 2 OS=Arabidopsis thaliana GN=GDH2 PE=1 SV=1	GO:0004352(glutamate dehydrogenase (NAD+) activity);GO:0004353(glutamate dehydrogenase [NAD(P)+] activity);GO:0005507(copper ion binding);GO:0005524(ATP binding);GO:0005737(cytoplasm);GO:0005739(mitochondrion);GO:0005774(vacuolar membrane);GO:0005794(Golg	COG0334(oxidoreductase activity, acting on the CH-NH2 group of donors, NAD or NADP as acceptor)	K00261	glutamate dehydrogenase (NAD(P)+)	EC:1.4.1.3	nnu00910(Nitrogen metabolism);nnu00250(Alanine, aspartate and glutamate metabolism);nnu00220(Arginine biosynthesis);nnu00471(D-Glutamine and D-glutamate metabolism)	B9RA12.1 PF00208.19;ELFV_dehydrog;	down	yes
TRINITY_DN11859_c0_g4	1020	TRINITY_DN11859_c0_g4_i1;TRINITY_DN11859_c0_g4_i2	40S ribosomal protein S12 [Jatropha curcas]	RPS12	40S ribosomal protein S12 OS=Hordeum vulgare GN=RPS12 PE=2 SV=1	GO:0003735(structural constituent of ribosome);GO:0022627(cytosolic small ribosomal subunit)	COG1358((ribosomal) protein)	K02951	small subunit ribosomal protein S12e	-	jcu03010(Ribosome)	A9P9I0.1 PF01248.24;Ribosomal_L7Ae;	no	no
TRINITY_DN11859_c0_g6	1126	TRINITY_DN11859_c0_g6_i1;TRINITY_DN11859_c0_g6_i2	40S ribosomal protein S12 [Ricinus communis]	RPS12	40S ribosomal protein S12 OS=Hordeum vulgare GN=RPS12 PE=2 SV=1	GO:0003735(structural constituent of ribosome);GO:0022627(cytosolic small ribosomal subunit)	COG1358((ribosomal) protein)	K02951	small subunit ribosomal protein S12e	-	rcu03010(Ribosome)	A9P9I0.1 PF01248.24;Ribosomal_L7Ae;	no	no
TRINITY_DN10379_c0_g4	2005	TRINITY_DN10379_c0_g4_i1	RAN GTPase-activating protein 1 [Ziziphus jujuba]	RANGAP2	RAN GTPase-activating protein 2 OS=Arabidopsis thaliana GN=RANGAP2 PE=1 SV=2	GO:0005096(GTPase activator activity);GO:0005635(nuclear envelope);GO:0005774(vacuolar membrane);GO:0005783(endoplasmic reticulum);GO:0005819(spindle);GO:0006913(nucleocytoplasmic transport);GO:0009507(chloroplast);GO:0009524(phragmoplast);GO:0009651(resp	COG5238(RAN GTPase activating protein 1)	K14319	Ran GTPase-activating protein 1	-	zju03013(RNA transport)	B9RTY6.1 PF13943.4;WPP;	no	no
TRINITY_DN11871_c0_g3	1323	TRINITY_DN11871_c0_g3_i1;TRINITY_DN11871_c0_g3_i2	histone H1-like [Hevea brasiliensis]	At2g30620	Histone H1.2 OS=Arabidopsis thaliana GN=At2g30620 PE=1 SV=1	GO:0000786(nucleosome);GO:0003677(DNA binding);GO:0005634(nucleus);GO:0005730(nucleolus);GO:0005739(mitochondrion);GO:0006334(nucleosome assembly)	ENOG410XYG5(histone h1)	NA	NA	NA	NA(NA)	A0A0A0KDR2.1 PF00538.17;Linker_histone;	no	no
TRINITY_DN11877_c0_g5	1469	TRINITY_DN11877_c0_g5_i1;TRINITY_DN11877_c0_g5_i2;TRINITY_DN11877_c0_g5_i3	hypothetical protein CDL15_Pgr016086 [Punica granatum]	RPL31	60S ribosomal protein L31 OS=Perilla frutescens GN=RPL31 PE=2 SV=1	GO:0002181(cytoplasmic translation);GO:0003735(structural constituent of ribosome);GO:0022625(cytosolic large ribosomal subunit)	COG2097((ribosomal) protein)	K02910	large subunit ribosomal protein L31e	-	cit03010(Ribosome)	B9GFQ5.1 PF01198.17;Ribosomal_L31e;	no	no
TRINITY_DN11885_c0_g12	1337	TRINITY_DN11885_c0_g12_i1	PREDICTED: S-adenosylmethionine synthase 2 [Gossypium raimondii]	SAMS2	S-adenosylmethionine synthase 2 OS=Elaeagnus umbellata GN=SAMS2 PE=2 SV=1	GO:0004478(methionine adenosyltransferase activity);GO:0005829(cytosol)	COG0192(Catalyzes the formation of S-adenosylmethionine from methionine and ATP)	K00789	S-adenosylmethionine synthetase	EC:2.5.1.6	gra00270(Cysteine and methionine metabolism)	I1NBG9.1 PF02773.14;S-AdoMet_synt_C;	no	no
TRINITY_DN11892_c0_g3	729	TRINITY_DN11892_c0_g3_i1;TRINITY_DN11892_c0_g3_i2;TRINITY_DN11892_c0_g3_i3;TRINITY_DN11892_c0_g3_i4	histone H2B [Jatropha curcas]	HIS2B	Histone H2B OS=Capsicum annuum GN=HIS2B PE=2 SV=3	GO:0000788(nuclear nucleosome);GO:0003677(DNA binding);GO:0006334(nucleosome assembly)	ENOG4111NV5(Core component of nucleosome. Nucleosomes wrap and compact DNA into chromatin, limiting DNA accessibility to the cellular machineries which require DNA as a template. Histones thereby play a central role in transcription regulation, DNA repair	NA	NA	NA	NA(NA)	A0A067L9C8.1 PF00125.22;Histone;	no	no
TRINITY_DN11892_c0_g6	694	TRINITY_DN11892_c0_g6_i1	histone H2B [Jatropha curcas]	HIS2B	Histone H2B OS=Capsicum annuum GN=HIS2B PE=2 SV=3	GO:0000788(nuclear nucleosome);GO:0003677(DNA binding);GO:0006334(nucleosome assembly)	ENOG4111NV5(Core component of nucleosome. Nucleosomes wrap and compact DNA into chromatin, limiting DNA accessibility to the cellular machineries which require DNA as a template. Histones thereby play a central role in transcription regulation, DNA repair	NA	NA	NA	NA(NA)	A0A067L9C8.1 PF00125.22;Histone;	no	no
TRINITY_DN11894_c0_g5	1196	TRINITY_DN11894_c0_g5_i1;TRINITY_DN11894_c0_g5_i2	-	-	-	-	-	-	-	-	-	-	no	no
TRINITY_DN11894_c0_g6	1426	TRINITY_DN11894_c0_g6_i1;TRINITY_DN11894_c0_g6_i2	-	-	-	-	-	-	-	-	-	-	no	no
TRINITY_DN11923_c1_g1	3203	TRINITY_DN11923_c1_g1_i1;TRINITY_DN11923_c1_g1_i10;TRINITY_DN11923_c1_g1_i11;TRINITY_DN11923_c1_g1_i2;TRINITY_DN11923_c1_g1_i3;TRINITY_DN11923_c1_g1_i4;TRINITY_DN11923_c1_g1_i5;TRINITY_DN11923_c1_g1_i6;TRINITY_DN11923_c1_g1_i7;TRINITY_DN11923_c1_g1_i8;TRI	LOW QUALITY PROTEIN: flavin-containing monooxygenase FMO GS-OX-like 4 [Hevea brasiliensis]	At1g62620	Flavin-containing monooxygenase FMO GS-OX-like 3 OS=Arabidopsis thaliana GN=At1g62620 PE=2 SV=2	GO:0004497(monooxygenase activity);GO:0055114(oxidation-reduction process)	COG2072(Monooxygenase)	K11816	indole-3-pyruvate monooxygenase	EC:1.14.13.168	aip00380(Tryptophan metabolism)	V4KH20.1 PF07992.12;Pyr_redox_2;	no	no
TRINITY_DN11926_c0_g6	1398	TRINITY_DN11926_c0_g6_i1	subtilisin-like protease SBT1.7 [Manihot esculenta]	SBT1.7	Subtilisin-like protease SBT1.7 OS=Arabidopsis thaliana GN=SBT1.7 PE=1 SV=1	GO:0004252(serine-type endopeptidase activity);GO:0005618(cell wall)	COG1404(peptidase (S8 and S53, subtilisin, kexin, sedolisin)	NA	NA	NA	NA(NA)	V4RWQ6.1 PF00082.20;Peptidase_S8;	no	no
TRINITY_DN11933_c0_g2	1470	TRINITY_DN11933_c0_g2_i1;TRINITY_DN11933_c0_g2_i10;TRINITY_DN11933_c0_g2_i11;TRINITY_DN11933_c0_g2_i12;TRINITY_DN11933_c0_g2_i13;TRINITY_DN11933_c0_g2_i14;TRINITY_DN11933_c0_g2_i2;TRINITY_DN11933_c0_g2_i3;TRINITY_DN11933_c0_g2_i4;TRINITY_DN11933_c0_g2_i5;	hypothetical protein CDL15_Pgr003218 [Punica granatum]	UEV1C	Ubiquitin-conjugating enzyme E2 variant 1C OS=Arabidopsis thaliana GN=UEV1C PE=1 SV=1	GO:0005634(nucleus);GO:0005737(cytoplasm);GO:0006301(postreplication repair);GO:0031625(ubiquitin protein ligase binding);GO:0061630(ubiquitin protein ligase activity);GO:0070534(protein K63-linked ubiquitination)	ENOG4111MDW(ubiquitin-conjugating enzyme)	NA	NA	NA	NA(NA)	A9PCP1.1 PF00179.24;UQ_con;	no	no
TRINITY_DN10047_c0_g1	1556	TRINITY_DN10047_c0_g1_i1	putative aspartic proteinase nepenthesin-1 precursor [Vernicia fordii]	AED3	Aspartyl protease AED3 OS=Arabidopsis thaliana GN=AED3 PE=1 SV=1	GO:0004190(aspartic-type endopeptidase activity);GO:0006508(proteolysis);GO:0030163(protein catabolic process)	ENOG410XNV7(aspartic)	NA	NA	NA	NA(NA)	B9RJV7.1 PF14541.4;TAXi_C;	up	yes
TRINITY_DN11942_c0_g1	1354	TRINITY_DN11942_c0_g1_i1;TRINITY_DN11942_c0_g1_i2;TRINITY_DN11942_c0_g1_i3	hypothetical protein CISIN_1g026399mg [Citrus sinensis]	NDPK3	Nucleoside diphosphate kinase III, chloroplastic/mitochondrial OS=Arabidopsis thaliana GN=NDPK3 PE=1 SV=1	GO:0004550(nucleoside diphosphate kinase activity);GO:0005622(intracellular);GO:0006163(purine nucleotide metabolic process);GO:0006220(pyrimidine nucleotide metabolic process);GO:0009142(nucleoside triphosphate biosynthetic process)	COG0105(Major role in the synthesis of nucleoside triphosphates other than ATP. The ATP gamma phosphate is transferred to the NDP beta phosphate via a ping-pong mechanism, using a phosphorylated active-site intermediate (By similarity))	K00940	nucleoside-diphosphate kinase	EC:2.7.4.6	cit00230(Purine metabolism);cit00240(Pyrimidine metabolism);cit04016(MAPK signaling pathway - plant)	A0A067GMJ8.1 PF00334.17;NDK;	no	no
TRINITY_DN11942_c0_g7	1748	TRINITY_DN11942_c0_g7_i1;TRINITY_DN11942_c0_g7_i2;TRINITY_DN11942_c0_g7_i3;TRINITY_DN11942_c0_g7_i4	dihydropyrimidine dehydrogenase (NADP(+)), chloroplastic-like [Cucurbita pepo subsp. pepo]	PYD1	Dihydropyrimidine dehydrogenase (NADP(+)), chloroplastic OS=Arabidopsis thaliana GN=PYD1 PE=1 SV=1	GO:0004152(dihydroorotate dehydrogenase activity);GO:0005737(cytoplasm);GO:0006207('de novo' pyrimidine nucleobase biosynthetic process)	COG0167(Catalyzes the conversion of dihydroorotate to orotate)	K00207	dihydropyrimidine dehydrogenase (NADP+)	EC:1.3.1.2	jcu00240(Pyrimidine metabolism);jcu00410(beta-Alanine metabolism);jcu00770(Pantothenate and CoA biosynthesis)	B9T6I2.1 PF01180.19;DHO_dh;	up	yes
TRINITY_DN11950_c0_g5	1663	TRINITY_DN11950_c0_g5_i1;TRINITY_DN11950_c0_g5_i2	uncharacterized protein LOC110668576 [Hevea brasiliensis]	-	-	-	ENOG4111E6J(NA)	-	-	-	-	-	no	no
TRINITY_DN10401_c0_g1	1320	TRINITY_DN10401_c0_g1_i1;TRINITY_DN10401_c0_g1_i2;TRINITY_DN10401_c0_g1_i3	mitochondrial carnitine/acylcarnitine carrier-like protein [Jatropha curcas]	BOU	Mitochondrial carnitine/acylcarnitine carrier-like protein OS=Arabidopsis thaliana GN=BOU PE=1 SV=1	GO:0003735(structural constituent of ribosome);GO:0006412(translation)	ENOG410XS86(Solute carrier family 25)	NA	NA	NA	NA(NA)	A0A0A0L3Z6.1 PF00153.25;Mito_carr;	no	no
TRINITY_DN11957_c0_g4	849	TRINITY_DN11957_c0_g4_i1;TRINITY_DN11957_c0_g4_i2	hypothetical protein CFOL_v3_29741 [Cephalotus follicularis]	At2g27730	Uncharacterized protein At2g27730, mitochondrial OS=Arabidopsis thaliana GN=At2g27730 PE=1 SV=1	GO:0005507(copper ion binding);GO:0005730(nucleolus);GO:0005739(mitochondrion);GO:0005747(mitochondrial respiratory chain complex I);GO:0005773(vacuole);GO:0009853(photorespiration);GO:0031966(mitochondrial membrane);GO:0045271(respiratory chain complex I	ENOG410Y847(NA)	-	-	-	-	A0A022RAW2.1 PF04568.10;IATP;	no	no
TRINITY_DN10402_c0_g2	820	TRINITY_DN10402_c0_g2_i1;TRINITY_DN10402_c0_g2_i2;TRINITY_DN10402_c0_g2_i3	PREDICTED: major allergen Pru ar 1-like [Nelumbo nucifera]	BETV1M	Major pollen allergen Bet v 1-M/N OS=Betula pendula GN=BETV1M PE=1 SV=2	GO:0004864(protein phosphatase inhibitor activity);GO:0005634(nucleus);GO:0005737(cytoplasm);GO:0009738(abscisic acid-activated signaling pathway);GO:0010427(abscisic acid binding);GO:0080163(regulation of protein serine/threonine phosphatase activity)	ENOG410YZ38(Pathogenesis-related protein)	-	-	-	-	A0A059B5M2.1 PF00407.17;Bet_v_1;	no	no
TRINITY_DN11965_c0_g2	3838	TRINITY_DN11965_c0_g2_i1;TRINITY_DN11965_c0_g2_i10;TRINITY_DN11965_c0_g2_i2;TRINITY_DN11965_c0_g2_i3;TRINITY_DN11965_c0_g2_i4;TRINITY_DN11965_c0_g2_i5;TRINITY_DN11965_c0_g2_i6;TRINITY_DN11965_c0_g2_i7;TRINITY_DN11965_c0_g2_i8;TRINITY_DN11965_c0_g2_i9	linoleate 13S-lipoxygenase 2-1, chloroplastic-like [Hevea brasiliensis]	LOX2.1	Linoleate 13S-lipoxygenase 2-1, chloroplastic OS=Solanum tuberosum GN=LOX2.1 PE=1 SV=1	GO:0016165(linoleate 13S-lipoxygenase activity)	ENOG410YN4N(Plant lipoxygenase may be involved in a number of diverse aspects of plant physiology including growth and development, pest resistance, and senescence or responses to wounding (By similarity))	K00454	lipoxygenase	EC:1.13.11.12	hbr00591(Linoleic acid metabolism);hbr00592(alpha-Linolenic acid metabolism)	A0A067JBW7.1 PF00305.17;Lipoxygenase;	no	no
TRINITY_DN11979_c0_g2	2551	TRINITY_DN11979_c0_g2_i1;TRINITY_DN11979_c0_g2_i2	PREDICTED: WEB family protein At5g55860 [Eucalyptus grandis]	At5g55860	WEB family protein At5g55860 OS=Arabidopsis thaliana GN=At5g55860 PE=1 SV=1	GO:0005829(cytosol);GO:0009903(chloroplast avoidance movement);GO:0009904(chloroplast accumulation movement)	-	K00787	farnesyl diphosphate synthase	EC:2.5.1.1 2.5.1.10	csat00900(Terpenoid backbone biosynthesis)	A0A059BR35.1 PF05701.9;WEMBL;	no	no
TRINITY_DN10405_c0_g4	2090	TRINITY_DN10405_c0_g4_i1	eukaryotic translation initiation factor 4B2-like isoform X1 [Manihot esculenta]	EIF4B1	Eukaryotic translation initiation factor 4B1 OS=Arabidopsis thaliana GN=EIF4B1 PE=1 SV=1	GO:0003729(mRNA binding);GO:0003743(translation initiation factor activity);GO:0005634(nucleus);GO:0006413(translational initiation)	ENOG4112ABA(eukaryotic translation initiation factor)	-	-	-	-	B9HTR6.1 PF06273.9;eIF-4B;	up	yes
TRINITY_DN10405_c0_g5	1266	TRINITY_DN10405_c0_g5_i1;TRINITY_DN10405_c0_g5_i2	proteasome subunit beta type-5-like [Hevea brasiliensis]	PBE2	Proteasome subunit beta type-5-B OS=Arabidopsis thaliana GN=PBE2 PE=1 SV=1	GO:0000502(proteasome complex);GO:0004175(endopeptidase activity);GO:0004298(threonine-type endopeptidase activity);GO:0005634(nucleus);GO:0005737(cytoplasm);GO:0005839(proteasome core complex);GO:0006511(ubiquitin-dependent protein catabolic process);GO:	ENOG410XQRP(The proteasome is a multicatalytic proteinase complex which is characterized by its ability to cleave peptides with Arg, Phe, Tyr, Leu, and Glu adjacent to the leaving group at neutral or slightly basic pH. The proteasome has an ATP-dependent	K02737	20S proteasome subunit beta 5	EC:3.4.25.1	hbr03050(Proteasome)	A0A078GJD0.1 PF00227.24;Proteasome;	no	no
TRINITY_DN11996_c0_g2	1832	TRINITY_DN11996_c0_g2_i1;TRINITY_DN11996_c0_g2_i10;TRINITY_DN11996_c0_g2_i2;TRINITY_DN11996_c0_g2_i3;TRINITY_DN11996_c0_g2_i4;TRINITY_DN11996_c0_g2_i5;TRINITY_DN11996_c0_g2_i6;TRINITY_DN11996_c0_g2_i7;TRINITY_DN11996_c0_g2_i8;TRINITY_DN11996_c0_g2_i9	PREDICTED: protein disulfide-isomerase [Populus euphratica]	-	Protein disulfide-isomerase OS=Ricinus communis PE=2 SV=1	GO:0005788(endoplasmic reticulum lumen)	COG0526(Thioredoxin)	K09580	protein disulfide-isomerase A1	EC:5.3.4.1	rcu04141(Protein processing in endoplasmic reticulum)	B9GU26.1 PF13848.4;Thioredoxin_6;	no	no
TRINITY_DN12003_c0_g6	1543	TRINITY_DN12003_c0_g6_i1;TRINITY_DN12003_c0_g6_i2;TRINITY_DN12003_c0_g6_i3;TRINITY_DN12003_c0_g6_i4	PREDICTED: protease Do-like 1, chloroplastic [Nelumbo nucifera]	DEGP1	Protease Do-like 1, chloroplastic OS=Arabidopsis thaliana GN=DEGP1 PE=1 SV=2	GO:0004252(serine-type endopeptidase activity);GO:0005515(protein binding);GO:0005634(nucleus);GO:0005739(mitochondrion);GO:0006508(proteolysis);GO:0008236(serine-type peptidase activity);GO:0009507(chloroplast);GO:0009534(chloroplast thylakoid);GO:000953	COG0265(Serine protease)	NA	NA	NA	NA(NA)	A0A0D2TAU2.1 PF13365.4;Trypsin_2;	no	no
TRINITY_DN10410_c0_g3	1077	TRINITY_DN10410_c0_g3_i1;TRINITY_DN10410_c0_g3_i2;TRINITY_DN10410_c0_g3_i3	protein PROTON GRADIENT REGULATION 5, chloroplastic [Herrania umbratica]	PGR5	Protein PROTON GRADIENT REGULATION 5, chloroplastic OS=Arabidopsis thaliana GN=PGR5 PE=1 SV=1	GO:0005515(protein binding);GO:0009055(electron transfer activity);GO:0009414(response to water deprivation);GO:0009507(chloroplast);GO:0009534(chloroplast thylakoid);GO:0009535(chloroplast thylakoid membrane);GO:0009644(response to high light intensity);	ENOG411252E(protein PROTON GRADIENT REGULATION 5)	-	-	-	-	-	no	no
TRINITY_DN10048_c0_g3	1045	TRINITY_DN10048_c0_g3_i1;TRINITY_DN10048_c0_g3_i2	peroxiredoxin-2F, mitochondrial-like [Hevea brasiliensis]	PRXIIF	Peroxiredoxin-2F, mitochondrial OS=Arabidopsis thaliana GN=PRXIIF PE=1 SV=2	GO:0004601(peroxidase activity);GO:0005739(mitochondrion);GO:0005759(mitochondrial matrix);GO:0006979(response to oxidative stress);GO:0016209(antioxidant activity);GO:0016491(oxidoreductase activity);GO:0045454(cell redox homeostasis);GO:0046686(response	COG0678(peroxiredoxin)	NA	NA	NA	NA(NA)	B9RTW9.1 PF08534.8;Redoxin;	no	no
TRINITY_DN12030_c0_g5	834	TRINITY_DN12030_c0_g5_i1	small heat shock protein, chloroplastic-like isoform X1 [Hevea brasiliensis]	HSP23.6	23.6 kDa heat shock protein, mitochondrial OS=Arabidopsis thaliana GN=HSP23.6 PE=2 SV=1	GO:0003674(molecular_function);GO:0005739(mitochondrion);GO:0009408(response to heat);GO:0046686(response to cadmium ion)	COG0071(response to heat)	K13993	HSP20 family protein	-	hbr04141(Protein processing in endoplasmic reticulum)	M5WBW9.1 PF00011.19;HSP20;	no	no
TRINITY_DN12033_c0_g1	956	TRINITY_DN12033_c0_g1_i1;TRINITY_DN12033_c0_g1_i2;TRINITY_DN12033_c0_g1_i3;TRINITY_DN12033_c0_g1_i4;TRINITY_DN12033_c0_g1_i5;TRINITY_DN12033_c0_g1_i6	PREDICTED: single-stranded DNA-binding protein, mitochondrial [Vitis vinifera]	At4g11060	Single-stranded DNA-binding protein, mitochondrial OS=Arabidopsis thaliana GN=At4g11060 PE=2 SV=1	GO:0003697(single-stranded DNA binding);GO:0005739(mitochondrion)	COG0629(single-stranded DNA-binding protein)	K03111	single-strand DNA-binding protein	-	cit03030(DNA replication);cit03430(Mismatch repair);cit03440(Homologous recombination)	D7U9Z5.1 PF00436.23;SSB;	no	no
TRINITY_DN12034_c0_g1	1543	TRINITY_DN12034_c0_g1_i1;TRINITY_DN12034_c0_g1_i2;TRINITY_DN12034_c0_g1_i3;TRINITY_DN12034_c0_g1_i4;TRINITY_DN12034_c0_g1_i5;TRINITY_DN12034_c0_g1_i6	fructose-bisphosphate aldolase 6, cytosolic [Carica papaya]	FAB6	Fructose-bisphosphate aldolase 6, cytosolic OS=Arabidopsis thaliana GN=FAB6 PE=1 SV=1	GO:0004332(fructose-bisphosphate aldolase activity);GO:0005507(copper ion binding);GO:0005515(protein binding);GO:0005634(nucleus);GO:0005737(cytoplasm);GO:0005739(mitochondrion);GO:0005829(cytosol);GO:0005886(plasma membrane);GO:0006094(gluconeogenesis);	COG3588(fructose-bisphosphate aldolase)	K01623	fructose-bisphosphate aldolase, class I	EC:4.1.2.13	cpap00010(Glycolysis / Gluconeogenesis);cpap00030(Pentose phosphate pathway);cpap00051(Fructose and mannose metabolism);cpap00710(Carbon fixation in photosynthetic organisms)	A9P9U1.1 PF00274.17;Glycolytic;	no	no
[truncated: 18 more rows]
